# Supplementary material for: Combination of RuCl3·xH2O with PEG – a simple and recyclable catalytic system for direct arylation of heteroarenes via C–H bond activation
Source: Royal Society of Chemistry journal article supplement (doi:10.1039/c7ra02638b), 2017-01-01

# Combination of $\text{RuCl}_3 \cdot x\text{H}_2\text{O}$ with PEG-A simple and Recyclable Catalytic System for Direct Arylations of Heteroarenes via C-H Bond Activation

*Lei Jian, Hai-Yu He, Jin Huang, Qian-Hui Wu, Mao-Lin Yuan,\* Hai-Yan Fu, Xue-Li Zheng, Hua Chen, and Rui-Xiang Li\**

*Key lab of Green Chemistry and Technology, Ministry of Education; College of Chemistry, Sichuan University, Chengdu 610064, People's Republic of China*

Fax: (+86)-28-8541-2904; E-mail: [liruixiang@scu.edu.cn](mailto:liruixiang@scu.edu.cn).

## Supplementary Material

### Table of contents

|                                                           |            |
|-----------------------------------------------------------|------------|
| Experimental section                                      | S2 - S3    |
| Experimental data                                         | S4 - S8    |
| X-ray crystallographic data for <b>4ak</b>                | S9 - S10   |
| NMR data of arylated products                             | S10 - S26  |
| Mass spectrum of dehydrogenative cross-coupling products  | S27        |
| Mass Spectrum of the oligomerizations of 2-phenylpyridine | S27        |
| $^1\text{H}$ and $^{13}\text{C}$ NMR spectra              | S28 - S129 |

## EXPERIMENTAL SECTION

**General methods.** All the chemicals were purchased from commercial supplier and used as received without any further purification. All reactions were performed in oven-dried schlenk tube under air. Column chromatography was performed on silica gel (300-400 mesh).  $^1\text{H}$  and  $^{13}\text{C}$  NMR spectra were recorded on a Bruker Avance II-400 MHz in  $\text{CDCl}_3$  or DMSO with TMS as internal standard. HPLC chromatograph analysis was conducted on an YOUNFLIN INSTRUMENT UV730D with an SP-120-5-ODS-AP column of 4.6 mm ID  $\times$  150 mm. Mass Spectra (MS) were performed on a Waters Q-TOF Premier mass spectrometer.

### **Typical experimental procedure for direct arylation of 2-phenylpyridine under**

**air:** An oven-dried and clean round-bottom flask was charged with  $\text{RuCl}_3 \cdot x\text{H}_2\text{O}$  (104 mg, 0.5 mmol) and PEG-400 (10 ml). The mixture was stirred at room temperature until  $\text{RuCl}_3 \cdot x\text{H}_2\text{O}$  was dispersed in PEG-400 completely. 2-phenylpyridine (**1a**, 1 mmol), 1-chloro-3-fluorobenzene (**2a**, 2.3 mmol),  $\text{LiOH} \cdot \text{H}_2\text{O}$  (126 mg, 3 mmol) and PEG-400 (1 mL) containing  $\text{RuCl}_3 \cdot x\text{H}_2\text{O}$  (0.05 mmol) were added to a schlenk tube, respectively. The mixture solution was stirred at 120 °C under air for 24 h. After cooled to room temperature, the reaction mixture was diluted with 10 mL of water. The aqueous layer was extracted with  $\text{Et}_2\text{O}$  (20 mL) and EtOAc (30 mL), respectively. The combined organic phase was washed with  $\text{H}_2\text{O}$  (20 mL), brine (20 mL), dried it with  $\text{Na}_2\text{SO}_4$  and concentrated under reduced pressure. The resulting residue was separated through a flash silica gel column chromatography (petroleum ether/EtOAc = 16:1) to give arylated products (306 mg, 95%). The ratio of mono- to diarylated

product was determined by  $^1\text{H}$  NMR spectroscopy. The arylated products were separated by a silica gel column chromatography (petroleum ether/ $\text{CH}_2\text{Cl}_2 = 1:16$ ) to afford target products **3aa** and **4aa**, respectively. The product was characterized by  $^1\text{H}$  and  $^{13}\text{C}$  NMR spectroscopy.

**Recycling experimental procedures:** In a reaction tube, 2-phenylpyridine (**1a**, 1mmol), 1-chloro-3-fluorobenzene (**2a**, 2.3 mmol),  $\text{LiOH}\cdot\text{H}_2\text{O}$  (126 mg, 3 mmol) and PEG-400 (1 mL) containing  $\text{RuCl}_3\cdot x\text{H}_2\text{O}$  (0.05 mmol) were stirred at  $120\text{ }^\circ\text{C}$  under air for 24 h. At the end of reaction, the reaction mixture was cooled to room temperature and extracted by employing  $\text{Et}_2\text{O}$  (50 ml). And then, 2-phenylpyridine (**1a**, 1 mmol), 1-chloro- 3-fluorobenzene (**2a**, 2.3 mmol),  $\text{LiOH}\cdot\text{H}_2\text{O}$  (126 mg, 3 mmol) was added to the PEG solution again, and the reaction and operation were repeated with the above-mentioned process.

**Table S1.** Effect of the ratio of the substrates on arylation of 2-phenylpyridine with 1-chloro-3-fluorobenzene

| Entry            | A : B (mmol) | conversion[%] | Yield [%] | 3aa/4aa [%] |
|------------------|--------------|---------------|-----------|-------------|
| 1 <sup>[a]</sup> | 1:2.3        | 98            | 94        | 66:34       |
| 2 <sup>[a]</sup> | 1:1.2        | 93            | 91        | 77:23       |
| 3 <sup>[a]</sup> | 1.2:1        | 96            | 93        | 84:16       |
| 4 <sup>[b]</sup> | 1:2.3        | >99           | 98        | 17:83       |
| 5 <sup>[b]</sup> | 1:3          | >99           | 97        | 20:80       |

Reaction conditions: [a] 2-phenylpyridine (A), 3-fluoro-chlorobenzene (B), PEG-400 as reaction medium (1 ml), RuCl<sub>3</sub>.xH<sub>2</sub>O (5 mol-%), and CH<sub>3</sub>COOK (2 equiv) and the reaction mixture was heated to 120°C and 1 h under air, the ratio of mono- and diarylated product determined by HPLC. [b] LiOH.H<sub>2</sub>O (3 equiv) and 24 h.

**Table S2.** Effect of ratio of substrate to catalyst on direct arylation of 2-phenylpyridine with 1-chloro-3-fluorobenzene.

| entry | S/C | Time(h) | Yield[%] | 3aa/4aa [%] |
|-------|-----|---------|----------|-------------|
| 1     | 20  | 24      | 98       | 17:83       |
| 2     | 80  | 24      | 76       | 62:38       |
| 3     | 100 | 24      | 55       | 58:42       |
|       |     | 48      | 58       | 58:42       |

Reaction conditions: 2-phenylpyridine (n mmol), 3-fluoro-chlorobenzene (2n+0.3 mmol), PEG-400 as reaction medium (1 ml), RuCl<sub>3</sub>.xH<sub>2</sub>O (0.05 mmol), and LiOH.xH<sub>2</sub>O (3 equiv) and the reaction mixture was heated to 120 °C under air, the ratio of mono- and diarylated product determined by HPLC.

**Table S3-a.** Effect of the reaction temperature on direct arylation of 2-phenylpyridine with 1-chloro-3-fluorobenzene.

| Entry | T[°C] | Time(h) | Yield[%] | 3aa/4aa [%] |
|-------|-------|---------|----------|-------------|
| 1     | 90    | 1       | 2        | \           |
|       |       | 24      | 22       | 87:13       |
| 2     | 120   | 1       | 91       | 77:23       |
| 3     | 150   | 1       | 79       | 78:22       |

Reaction conditions: 2-phenylpyridine (1 mmol), 3-fluoro-chlorobenzene (1.2 mmol), PEG-400 as reaction medium (1 ml), RuCl<sub>3</sub>.xH<sub>2</sub>O (5 mol-%), and CH<sub>3</sub>COOK (2 equiv) and the reaction mixture was heated under air, the ratio of mono- and diarylated product determined by HPLC.

**Table S3-b.** Effect of the reaction temperature on direct arylation of 2-phenylpyridine with 1-chloro-3-fluorobenzene.

| Entry | T[°C] | Time(h) | Yield[%] | 3aa/4aa [%] |
|-------|-------|---------|----------|-------------|
| 1     | 90    | 5       | 8        | \           |
|       |       | 24      | 13       | \           |
| 2     | 120   | 5       | 96       | 25:75       |
|       |       | 24      | 97       | 15:85       |
| 3     | 150   | 5       | 99       | 44:56       |
|       |       | 24      | 99       | 40:60       |

Reaction conditions: 2-phenylpyridine (1 mmol), 3-fluoro-chlorobenzene (2.3 mmol), PEG-400 as reaction medium (1 ml), RuCl<sub>3</sub>.xH<sub>2</sub>O (5 mol-%), and LiOH.xH<sub>2</sub>O (3 equiv) and the reaction mixture was heated under air, the ratio of mono- and diarylated product determined by HPLC.

**Table S4.** Recyclability of the catalyst for direct the arylation of 2-phenylpyridine with 1-chloro-3-fluorobenzene.

| entry | run | Time[h] | yield [%] | ratio(3aa/4aa) |
|-------|-----|---------|-----------|----------------|
| 1     | 1   | 1       | 91        | 77:23          |
| 2     | 2   | 2       | 25        | 84:16          |
| 3     | 3   | 5       | 6         | 50:50          |
| 4     | 4   | 5       | \         | \              |

Reaction conditions: 2-phenylpyridine (1 mmol), 3-fluoro-chlorobenzene (1.2 mmol), PEG-400 as reaction medium (1 ml),  $\text{RuCl}_3 \cdot x\text{H}_2\text{O}$  (5 mol-%), and  $\text{CH}_3\text{COOK}$  (2 equiv) and the reaction mixture was heated to 120 °C under air, the ratio determined by HPLC and every circulation needing to add equivalent base.



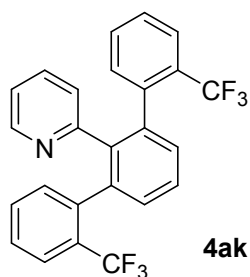

**2-Di[2-(2-trifluoromethylphenyl)]phenylpyridine(4ak).**

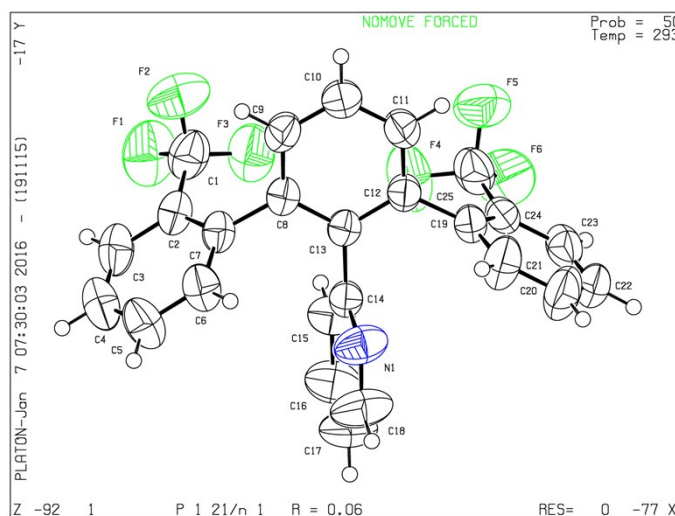

**Table 1 Crystal data and structure refinement for 1.**

|                                      |                                                  |
|--------------------------------------|--------------------------------------------------|
| CCDC number                          | 1481843                                          |
| Identification code                  | 1                                                |
| Empirical formula                    | C <sub>25</sub> H <sub>15</sub> F <sub>6</sub> N |
| Formula weight                       | 443.38                                           |
| Temperature/K                        | 293(2)                                           |
| Crystal system                       | monoclinic                                       |
| Space group                          | P2 <sub>1</sub> /n                               |
| a/Å                                  | 8.6865(3)                                        |
| b/Å                                  | 11.0532(4)                                       |
| c/Å                                  | 22.5491(8)                                       |
| α/°                                  | 90                                               |
| β/°                                  | 95.493(3)                                        |
| γ/°                                  | 90                                               |
| Volume/Å <sup>3</sup>                | 2155.09(14)                                      |
| Z                                    | 4                                                |
| ρ <sub>calc</sub> /g/cm <sup>3</sup> | 1.367                                            |
| μ/mm <sup>-1</sup>                   | 1.006                                            |
| F(000)                               | 904.0                                            |
| Crystal size/mm <sup>3</sup>         | 0.36 × 0.28 × 0.2                                |
| Radiation                            | CuKα (λ = 1.54184)                               |
| 2θ range for data collection/°       | 10.606 to 134.084                                |
| Index ranges                         | -9 ≤ h ≤ 10, -13 ≤ k ≤ 8, -26 ≤ l ≤ 26           |
| Reflections collected                | 11668                                            |

|                                                |                                                                  |
|------------------------------------------------|------------------------------------------------------------------|
| Independent reflections                        | 3844 [ $R_{\text{int}} = 0.0307$ , $R_{\text{sigma}} = 0.0225$ ] |
| Data/restraints/parameters                     | 3844/0/289                                                       |
| Goodness-of-fit on $F^2$                       | 1.045                                                            |
| Final R indexes [ $I \geq 2\sigma(I)$ ]        | $R_1 = 0.0605$ , $wR_2 = 0.1720$                                 |
| Final R indexes [all data]                     | $R_1 = 0.0696$ , $wR_2 = 0.1835$                                 |
| Largest diff. peak/hole / $e \text{ \AA}^{-3}$ | 0.34/-0.26                                                       |

**2-[2-phenyl]phenylpyridine (3ab).** Pale yellow solid. Mp = 89°C.  $^1\text{H}$  NMR (400 MHz,  $\text{CDCl}_3$ )  $\delta$  8.63 (d,  $J = 4.9$  Hz, 1H), 7.73 – 7.68 (m, 1H), 7.49 – 7.42 (m, 3H), 7.38 (m, 1H), 7.25 – 7.21 (m, 3H), 7.16 (m, 2H), 7.13 – 7.08 (m, 1H), 6.89 (d,  $J = 7.9$  Hz, 1H).  $^{13}\text{C}$  NMR (101 MHz,  $\text{CDCl}_3$ )  $\delta$  158.19, 148.32, 140.31, 139.61, 138.37, 134.23, 129.47, 128.68, 127.52, 127.03, 126.63, 125.68, 124.41, 120.33. HRMS (ESI): Calc'd for  $\text{C}_{17}\text{H}_{14}\text{N}$  ( $[\text{M}+\text{H}]^+$ ): 232.1126; found, 232.1097.  $\text{C}_{17}\text{H}_{13}\text{N}$  (231.1048).

**2-Di[2-phenyl]phenylpyridine (4ab).** Pale yellow solid. Mp = 135°C  $^1\text{H}$  NMR (400 MHz,  $\text{CDCl}_3$ )  $\delta$  8.32 – 8.28 (m, 1H), 7.51 (dd,  $J = 8.6, 6.4$  Hz, 1H), 7.46 – 7.42 (m, 2H), 7.28 (td,  $J = 7.7, 1.8$  Hz, 1H), 7.16 – 7.07 (m, 10H), 6.89 (ddd,  $J = 13.7, 8.0, 4.2$  Hz, 2H).  $^{13}\text{C}$  NMR (101 MHz,  $\text{CDCl}_3$ )  $\delta$  157.87, 147.43, 140.81, 140.54, 137.43, 133.86, 128.60, 128.43, 127.15, 126.60, 125.77, 125.24, 119.85. HRMS (ESI): Calc'd for  $\text{C}_{23}\text{H}_{18}\text{N}$  ( $[\text{M}+\text{H}]^+$ ): 308.1439; found, 308.1405.  $\text{C}_{23}\text{H}_{17}\text{N}$  (307.1361).

**2-[2-(2-quinolinyl)]phenylpyridine (3ap).** Yellow oil (103mg, 37%):  $^1\text{H}$  NMR (400 MHz,  $\text{CDCl}_3$ )  $\delta$  8.58 (m, 1H), 8.11 (d,  $J = 8.6$  Hz, 1H), 7.87 (d,  $J = 8.4$  Hz, 1H), 7.84 – 7.80 (m, 1H), 7.74 (m, 2H), 7.69 (m, 1H), 7.58 – 7.53 (m, 2H), 7.50 (m, 1H), 7.37 (td,  $J = 7.7, 1.8$  Hz, 1H), 7.10 (m, 1H), 7.05 (d,  $J = 8.5$  Hz, 1H), 7.01 (dt,  $J = 7.9, 1.0$

Hz, 1H). <sup>13</sup>C NMR (101 MHz, CDCl<sub>3</sub>) δ 159.60, 158.86, 149.38, 148.01, 139.79, 139.66, 135.79, 135.36, 130.72, 130.42, 129.55, 129.46, 129.06, 128.94, 127.49, 126.65, 126.47, 125.33, 123.28, 121.67. HRMS (ESI): Calc'd for C<sub>20</sub>H<sub>15</sub>N<sub>2</sub> ([M+H])<sup>+</sup>: 283.1235; found, 283.1218. C<sub>20</sub>H<sub>14</sub>N<sub>2</sub> (282.1157).

**2-Di[2-(2-quinolinyl)]phenylpyridine (4ap).** Light green solid. Mp=160-161°C. (143mg, 35%): <sup>1</sup>H NMR (400 MHz, CDCl<sub>3</sub>) δ 8.24 – 8.18 (m, 1H), 8.04 (d, *J* = 8.4 Hz, 2H), 7.92 (d, *J* = 7.7 Hz, 2H), 7.84 (dd, *J* = 8.5, 4.0 Hz, 2H), 7.72 (m, 3H), 7.69 – 7.64 (m, 2H), 7.52 – 7.45 (m, 2H), 7.29 (dd, *J* = 7.4, 6.1 Hz, 1H), 7.13 – 7.01 (m, 3H), 6.95 – 6.88 (m, 1H). <sup>13</sup>C NMR (101 MHz, CDCl<sub>3</sub>) δ 159.41, 158.27, 148.33, 147.85, 141.15, 141.11, 135.61, 135.15, 131.02, 129.49, 129.39, 129.02, 127.41, 127.22, 126.45, 126.37, 122.90, 121.32. HRMS (ESI): Calc'd for C<sub>29</sub>H<sub>20</sub>N<sub>3</sub> ([M+H])<sup>+</sup>: 410.1657; found, 410.1652. C<sub>29</sub>H<sub>19</sub>N<sub>3</sub> (409.1579).

**2-[2-(2-thiophenyl)]phenylpyridine (3aq).** White solid. Mp=196°C. <sup>1</sup>H NMR (400 MHz, DMSO) δ 8.61 (m, 1H), 7.69 (td, *J* = 7.7, 1.8 Hz, 1H), 7.59 – 7.55 (m, 1H), 7.53 – 7.46 (m, 3H), 7.45 (m, 1H), 7.32 (m, 1H), 7.21 – 7.17 (d, *J* = 8.0 Hz, 1H), 6.95 (dd, *J* = 5.1, 3.6 Hz, 1H), 6.78 (dd, *J* = 3.5, 1.2 Hz, 1H). <sup>13</sup>C NMR (101 MHz, DMSO) δ 158.99, 149.60, 142.65, 139.90, 136.63, 133.03, 130.94, 130.70, 129.14, 128.35, 127.76, 127.25, 127.15, 125.12, 122.81. HRMS (ESI): Calc'd for C<sub>15</sub>H<sub>12</sub>NS ([M+H])<sup>+</sup>: 238.0690; found, 238.0658. C<sub>15</sub>H<sub>11</sub>NS (237.0612).

**2-Di[2-(2-thiophenyl)]phenylpyridine (4aq).** Yellow oil. <sup>1</sup>H NMR (400 MHz, DMSO) δ 8.55 (d, *J* = 4.2 Hz, 1H), 7.66 – 7.54 (m, 4H), 7.39 (dd, *J* = 5.1, 1.1 Hz, 2H), 7.30 (m, 1H), 7.13 (d, *J* = 7.8 Hz, 1H), 6.88 (dd, *J* = 5.1, 3.6 Hz, 2H), 6.72 (dd, *J* =

3.6, 1.1 Hz, 2H).  $^{13}\text{C}$  NMR (101 MHz, DMSO)  $\delta$  158.18, 149.27, 142.41, 138.33, 136.66, 134.56, 129.86, 129.19, 127.57, 127.41, 127.35, 126.75, 123.36. HRMS (ESI): Calc'd for  $\text{C}_{19}\text{H}_{14}\text{NS}_2$  ( $[\text{M}+\text{H}]^+$ ): 320.0568; found, 320.0538.  $\text{C}_{19}\text{H}_{13}\text{NS}_2$  (319.0489).

**2-[2-(3-thiophenyl)]phenylpyridine (3ar)**. White solid. Mp=197-198°C.  $^1\text{H}$  NMR (400 MHz, DMSO)  $\delta$  8.60 (d,  $J$  = 4.9 Hz, 1H), 7.63 (m, 1H), 7.56 – 7.44 (m, 4H), 7.39 (dd,  $J$  = 5.0, 3.0 Hz, 1H), 7.30 – 7.25 (m, 2H), 7.06 (m, 1H), 6.63 (d,  $J$  = 5.0 Hz, 1H).  $^{13}\text{C}$  NMR (101 MHz, DMSO)  $\delta$  159.25, 149.71, 141.78, 139.73, 136.30, 135.25, 130.76, 130.48, 129.08, 128.98, 127.87, 126.19, 124.94, 123.67, 122.47. HRMS (ESI): Calc'd for  $\text{C}_{15}\text{H}_{12}\text{NS}$  ( $[\text{M}+\text{H}]^+$ ): 238.0690; found, 238.0660.  $\text{C}_{15}\text{H}_{11}\text{NS}$  (237.0612).

**2-Di[2-(3-thiophenyl)]phenylpyridine (4ar)**. Yellow oil.  $^1\text{H}$  NMR (400 MHz, DMSO)  $\delta$  8.48 (d,  $J$  = 4.8 Hz, 1H), 7.57 – 7.47 (m, 4H), 7.31 (m, 2H), 7.20 (m, 1H), 7.08 (dt,  $J$  = 5.9, 2.9 Hz, 2H), 7.00 (d,  $J$  = 7.8 Hz, 1H), 6.62 (d,  $J$  = 5.0 Hz, 2H).  $^{13}\text{C}$  NMR (101 MHz, DMSO)  $\delta$  159.12, 148.97, 141.76, 138.52, 136.51, 136.24, 129.26, 129.04, 128.81, 126.35, 125.62, 123.77, 122.52. HRMS (ESI): Calc'd for  $\text{C}_{19}\text{H}_{14}\text{NS}_2$  ( $[\text{M}+\text{H}]^+$ ): 320.0568; found, 320.0538.  $\text{C}_{19}\text{H}_{13}\text{NS}_2$  (319.0489).

**2-[2-(4-Methoxyphenyl)]phenylpyridine (3ah)**. Light yellow oil. (63mg, 24%): NMR data were consistent with reported data.<sup>1</sup>  $^1\text{H}$  NMR (400 MHz,  $\text{CDCl}_3$ )  $\delta$  8.64 (d,  $J$  = 4.8 Hz, 1H), 7.70 – 7.65 (m, 1H), 7.42 (m, 4H), 7.12 – 7.05 (m, 3H), 6.89 (d,  $J$  = 8.0 Hz), 6.78 (d,  $J$  = 8.8 Hz), 3.78 (s, 3H).  $^{13}\text{C}$  NMR (101 MHz,  $\text{CDCl}_3$ )  $\delta$  159.44, 158.53, 149.41, 140.20, 139.33, 135.29, 133.71, 130.78, 130.51, 130.45, 128.54, 127.32, 125.46, 121.30, 113.55, 55.21.

**2-Di[2-(4-Methoxyphenyl)]phenylpyridine (4ah).** White solid. Mp =162-163 °C.

(244mg, 66%): <sup>1</sup>H NMR (400 MHz, CDCl<sub>3</sub>) δ 8.35 (d, *J* = 4.6 Hz, 1H), 7.51 – 7.45 (m, 1H), 7.40 (d, *J* = 7.7 Hz, 2H), 7.34 (t, *J* = 7.6 Hz, 1H), 7.01 (d, *J* = 8.6 Hz, 4H), 6.97 – 6.91 (m, 1H), 6.88 (d, *J* = 7.8 Hz, 1H), 6.69 (d, *J* = 8.6 Hz, 4H), 3.74 (s, 6H). <sup>13</sup>C NMR (101 MHz, CDCl<sub>3</sub>) δ 158.25, 157.03, 147.53, 140.38, 137.42, 133.98, 133.04, 129.64, 128.15, 127.09, 125.76, 119.77, 112.07, 54.08. HRMS (ESI): Calc'd for C<sub>25</sub>H<sub>22</sub>NO<sub>2</sub> ([M+H])<sup>+</sup>: 368.1651; found, 368.1621. C<sub>25</sub>H<sub>21</sub>NO<sub>2</sub> (367.1572).

**2-[2-(4-acetylphenyl)]phenylpyridine (3ao).** Yellow oil. (80mg, 29%): <sup>1</sup>H NMR (400 MHz, CDCl<sub>3</sub>) δ 8.63 – 8.58 (m, 1H), 7.83 (d, *J* = 8.5 Hz, 2H), 7.73 – 7.67 (m, 1H), 7.54 – 7.47 (m, 2H), 7.46 – 7.39 (m, 2H), 7.25 (d, *J* = 8.8 Hz, 2H), 7.15 – 7.10 (m, 1H), 6.93 (d, *J* = 8.0 Hz, 1H), 2.57 (s, 3H). <sup>13</sup>C NMR (101 MHz, CDCl<sub>3</sub>) δ 197.83, 158.85, 149.49, 146.44, 139.57, 139.50, 135.60, 135.36, 130.65, 130.32, 129.88, 128.69, 128.33, 128.16, 125.23, 121.63, 26.60. HRMS (ESI): Calc'd for C<sub>19</sub>H<sub>16</sub>NO ([M+H])<sup>+</sup>: 274.1232; found, 274.1202. C<sub>19</sub>H<sub>15</sub>NO (273.1154).

**2-Di[2-(4-acetylphenyl)]phenylpyridine (4ao).** Light green solid. Mp = 198 °C.

(242mg, 62%): <sup>1</sup>H NMR (400 MHz, CDCl<sub>3</sub>) δ 8.34 – 8.29 (d, *J* = 5.6 Hz, 1H), 7.76 (d, *J* = 8.4 Hz, 4H), 7.58 (m, 1H), 7.52 – 7.46 (m, 2H), 7.33 (m, 1H), 7.19 (d, *J* = 8.4 Hz, 4H), 6.99 – 6.94 (m, 1H), 6.88 (d, *J* = 7.8 Hz, 1H), 2.55 (s, 6H). <sup>13</sup>C NMR (101 MHz, CDCl<sub>3</sub>) δ 197.83, 157.93, 148.74, 146.32, 140.99, 138.30, 135.42, 135.16, 129.90, 129.79, 128.56, 127.84, 126.73, 121.53, 26.56. HRMS (ESI): Calc'd for C<sub>27</sub>H<sub>22</sub>NO<sub>2</sub> ([M+H])<sup>+</sup>: 392.1651; found, 392.1629. C<sub>27</sub>H<sub>21</sub>NO<sub>2</sub> (391.1572).

**2-[2-(4-Methylphenyl)]phenylpyridine (3ae).** Colorless oil. (80mg, 33%): NMR data were consistent with reported data.<sup>1</sup> <sup>1</sup>H NMR (400 MHz, CDCl<sub>3</sub>) δ 8.63 (d, *J* = 4.8 Hz, 1H), 7.71 – 7.65 (m, 1H), 7.47 – 7.41 (m, 3H), 7.41 – 7.35 (m, 1H), 7.09 (dd, *J* = 7.3, 5.1 Hz, 1H), 7.04 (s, 4H), 6.90 (d, *J* = 7.9 Hz, 1H), 2.31 (s, 3H). <sup>13</sup>C NMR (101 MHz, CDCl<sub>3</sub>) δ 159.43, 149.41, 140.57, 139.41, 138.38, 136.39, 135.25, 130.54, 130.52, 129.59, 128.84, 128.54, 127.45, 125.46, 121.32, 21.14.

**2-Di[2-(4-Methylphenyl)]phenylpyridine (4ae).** White solid. Mp = 148 °C. (171mg, 51%): <sup>1</sup>H NMR (400 MHz, CDCl<sub>3</sub>) δ 8.34 (d, *J* = 4.8 Hz, 1H), 7.49 (m, 1H), 7.43 – 7.39 (m, 2H), 7.33 (t, *J* = 7.6 Hz, 1H), 6.99 (d, *J* = 4.2 Hz, 1H), 6.95 (m, 8H), 6.90 (d, *J* = 7.8 Hz, 1H), 2.26 (s, 6H). <sup>13</sup>C NMR (101 MHz, CDCl<sub>3</sub>) δ 159.26, 148.52, 141.77, 138.74, 138.45, 135.82, 134.96, 129.50, 129.38, 128.39, 128.17, 126.82, 120.83, 21.08. HRMS (ESI): Calc'd for C<sub>25</sub>H<sub>22</sub>N ([M+H])<sup>+</sup> : 336.1752; found, 336.1724. C<sub>25</sub>H<sub>21</sub>N (335.1674).

**2-[2-(3-Methoxyphenyl)]phenylpyridine (3ag).** White solid. Mp = 80 °C. (60mg, 23%): <sup>1</sup>H NMR (400 MHz, CDCl<sub>3</sub>) δ 8.64 (d, *J* = 4.8 Hz, 1H), 7.72 – 7.67 (m, 1H), 7.50 – 7.44 (m, 3H), 7.40 (td, *J* = 7.7, 1.7 Hz, 1H), 7.17 – 7.08 (m, 2H), 6.92 (d, *J* = 7.9 Hz, 1H), 6.77 (m, 2H), 6.70 – 6.65 (s, 1H), 3.63 (s, 3H). <sup>13</sup>C NMR (101 MHz, CDCl<sub>3</sub>) δ 158.24, 158.15, 148.31, 141.65, 139.43, 138.42, 134.27, 129.40, 129.30, 128.04, 127.50, 126.70, 124.34, 121.15, 120.33, 113.87, 111.86, 54.06. HRMS (ESI): Calc'd for C<sub>18</sub>H<sub>16</sub>NO ([M+H])<sup>+</sup> : 262.1232; found, 262.1205. C<sub>18</sub>H<sub>15</sub>NO (261.1154).

**2-Di[2-(3-Methoxyphenyl)]phenylpyridine (4ag).** White solid. Mp = 181 °C.

(198mg, 54%): <sup>1</sup>H NMR (400 MHz, CDCl<sub>3</sub>) δ 8.35 (d, *J* = 4.7 Hz, 1H), 7.53 – 7.44 (m, 3H), 7.32 (t, *J* = 6.9 Hz, 1H), 7.08 (t, *J* = 7.9 Hz, 2H), 6.93 (m, 2H), 6.74 (d, *J* = 7.5 Hz, 2H), 6.69 (m, 2H), 6.60 (d, *J* = 1.5 Hz, 2H), 3.56 (s, 6H). <sup>13</sup>C NMR (101 MHz, CDCl<sub>3</sub>) δ 158.07, 157.81, 147.48, 141.83, 140.66, 137.31, 134.04, 128.41, 127.65, 127.19, 125.69, 121.08, 119.94, 113.63, 111.86, 54.01. HRMS (ESI): Calc'd for C<sub>25</sub>H<sub>22</sub>NO<sub>2</sub> ([M+H])<sup>+</sup>: 368.1651; found, 368.1620. C<sub>25</sub>H<sub>21</sub>NO<sub>2</sub> (367.1572).

**2-[2-(3-acetylphenyl)]phenylpyridine (3an).** White solid. Mp = 105-106 °C. (145mg, 53%): <sup>1</sup>H NMR (400 MHz, CDCl<sub>3</sub>) δ 8.64 – 8.59 (d, *J* = 4.4 Hz, 1H), 7.82 (d, *J* = 7.2 Hz, 1H), 7.75 (t, *J* = 1.4 Hz, 1H), 7.72 – 7.67 (m, 1H), 7.53 – 7.46 (m, 3H), 7.46 – 7.40 (m, 1H), 7.38 – 7.30 (m, 2H), 7.12 (m, 1H), 6.93 (d, *J* = 7.9 Hz, 1H), 2.44 (s, 3H). <sup>13</sup>C NMR (101 MHz, CDCl<sub>3</sub>) δ 197.94, 159.09, 149.45, 141.68, 139.58, 139.54, 136.94, 135.57, 134.26, 130.56, 130.36, 129.93, 128.78, 128.40, 128.13, 126.42, 125.32, 121.57, 26.56. HRMS (ESI): Calc'd for C<sub>19</sub>H<sub>16</sub>NO ([M+H])<sup>+</sup>: 274.1232; found, 274.1203. C<sub>19</sub>H<sub>15</sub>NO (273.1154).

**2-Di[2-(3-acetylphenyl)]phenylpyridine (4an).** White solid. Mp = 86 °C. (152mg, 39%): NMR data were consistent with reported data.<sup>1</sup> <sup>1</sup>H NMR (400 MHz, CDCl<sub>3</sub>) δ 8.38 – 8.33 (d, *J* = 4.6 Hz, 1H), 7.79 – 7.74 (d, *J* = 8.0 Hz, 2H), 7.68 (t, *J* = 1.5 Hz, 2H), 7.58 (m, 1H), 7.53 – 7.49 (m, 2H), 7.39 – 7.31 (m, 3H), 7.28 (t, *J* = 7.7 Hz, 2H), 6.97 – 6.89 (m, 2H), 2.40 (s, 6H). <sup>13</sup>C NMR (101 MHz, CDCl<sub>3</sub>) δ 197.84, 158.45, 148.71, 141.58, 140.94, 138.50, 136.54, 135.44, 134.10, 129.99, 129.78, 128.70, 128.17, 126.88, 126.20, 121.39, 26.54.

**2-[2-(3-Methylphenyl)]phenylpyridine (3ad).** White solid, Mp = 90 °C. NMR data were consistent with reported data.<sup>1</sup> <sup>1</sup>H NMR (400 MHz, CDCl<sub>3</sub>) δ 8.64 (d, *J* = 4.8 Hz, 1H), 7.69 (m, 1H), 7.43 (m, 4H), 7.11 (m, 2H), 7.02 (d, *J* = 10.8 Hz, 2H), 6.91 (d, *J* = 7.9 Hz, 2H), 2.26 (s, 3H).<sup>13</sup>C NMR (101 MHz, CDCl<sub>3</sub>) δ 158.29, 148.27, 140.19, 139.68, 138.37, 136.60, 134.12, 129.41, 129.39, 129.36, 127.43, 126.81, 126.49, 126.38, 125.83, 124.36, 120.25, 20.32.

**2-Di[2-(3-Methylphenyl)]phenylpyridine (4ad).** Pale yellow solid. Mp = 91 °C. NMR data were consistent with reported data.<sup>1</sup> <sup>1</sup>H NMR (400 MHz, CDCl<sub>3</sub>) δ 8.33 – 8.28 (d, *J* = 4.4 Hz, 1H), 7.48 (m, 1H), 7.44 – 7.40 (m, 2H), 7.28 (td, *J* = 7.7, 1.8 Hz, 1H), 6.99 (m, 4H), 6.93 (d, *J* = 7.5 Hz, 2H), 6.90 – 6.83 (m, 4H), 2.19 (s, 6H).<sup>13</sup>C NMR (101 MHz, CDCl<sub>3</sub>) δ 157.95, 147.11, 140.81, 140.38, 137.22, 136.07, 133.90, 129.45, 128.24, 127.09, 126.38, 125.93, 125.76, 125.61, 119.77, 20.22.

**2-[2-(2-Methoxyphenyl)]phenylpyridine (3af).** White solid. Mp = 75-76 °C. (45mg, 17%): NMR data were consistent with reported data.<sup>1</sup> <sup>1</sup>H NMR (400 MHz, CDCl<sub>3</sub>) δ 8.71 – 8.64 (m, 1H), 7.79 (m, 1H), 7.45 (m, 4H), 7.25 – 7.21 (m, 2H), 7.16 (d, *J* = 8.5 Hz, 1H), 6.97 (m, 2H), 6.71 (d, *J* = 8.2 Hz, 1H), 3.36 (s, 3H).<sup>13</sup>C NMR (101 MHz, CDCl<sub>3</sub>) δ 159.35, 156.06, 148.70, 139.82, 137.07, 135.44, 131.47, 131.06, 130.31, 129.68, 128.82, 128.51, 127.77, 123.82, 121.26, 120.72, 110.69, 54.92.

**2-Di[2-(2-Methoxyphenyl)]phenylpyridine (4af).** White solid. Mp = 186-187 °C. (99mg, 27%): NMR data were consistent with reported data.<sup>1</sup> <sup>1</sup>H NMR (400 MHz, DMSO) δ 8.07 (s, 1H), 7.45 (t, *J* = 7.5 Hz, 1H), 7.28 (d, *J* = 7.5 Hz, 3H), 7.13 (t, *J* = 7.6 Hz, 2H), 6.97 (s, 2H), 6.87 (s, 1H), 6.77 (d, *J* = 7.4 Hz, 5H), 3.37 (s, 6H).<sup>13</sup>C



NMR (101 MHz, CDCl<sub>3</sub>)  $\delta$  158.31, 154.93, 146.11, 138.86, 136.94, 132.87, 130.91, 129.64, 129.02, 127.20, 126.67, 124.74, 119.36, 119.11, 109.01, 53.83.

**2-[2-(2-Methylphenyl)]phenylpyridine (3ac).** white solid. Mp = 54 °C (54mg, 22%):

NMR data were consistent with reported data.<sup>1</sup> <sup>1</sup>H NMR (400 MHz, CDCl<sub>3</sub>)  $\delta$  8.60 (d,  $J$  = 4.9Hz, 1H), 7.80 (dd,  $J$  = 7.5, 1.5 Hz, 1H), 7.45 (m, 2H), 7.30 – 7.25 (m, 2H), 7.18 – 7.11 (m, 3H), 7.04 (m, 2H), 6.79 (d,  $J$  = 8.0 Hz, 1H), 1.88 (s, 3H).<sup>13</sup>C NMR (101 MHz, CDCl<sub>3</sub>)  $\delta$  158.69, 149.43, 141.13, 140.15, 139.76, 135.96, 135.17, 130.59, 130.41, 130.04, 129.97, 128.35, 127.77, 127.30, 125.62, 124.58, 121.34, 20.04.

**2-Di[2-(2-Methylphenyl)]phenylpyridine (4ac).** white solid. Mp = 130-131 °C.

(63mg, 19%): <sup>1</sup>H NMR (400 MHz, CDCl<sub>3</sub>)  $\delta$  8.17 – 8.13 (d,  $J$  = 4.8 Hz, 1H), 7.47 (t,  $J$  = 7.6 Hz, 1H), 7.31 (d,  $J$  = 7.6 Hz, 2H), 7.20 – 7.15 (m, 1H), 7.14 – 7.11 (m, 1H), 7.07 – 6.97 (m, 7H), 6.75 (m, 2H), 2.10 (s, 3H), 2.02 (s, 3H).<sup>13</sup>C NMR (101 MHz, CDCl<sub>3</sub>)  $\delta$  157.37, 146.91, 140.25, 140.07, 134.89, 133.27, 129.56, 129.19, 128.30, 128.02, 126.43, 125.70, 124.67, 123.71, 119.59, 19.39. HRMS (ESI): Calc'd for C<sub>25</sub>H<sub>22</sub>N ([M+H])<sup>+</sup>: 336.1752; found, 336.1722. C<sub>25</sub>H<sub>21</sub>N (335.1674).

**2-[2-(4-fluorophenyl)]phenylpyridine (3aj).** white solid. Mp = 84 °C. (94mg, 38%):

<sup>1</sup>H NMR (400 MHz, CDCl<sub>3</sub>)  $\delta$  8.64 (d,  $J$  = 4.7 Hz, 1H), 7.69 (m, 1H), 7.50 – 7.39 (m, 4H), 7.17 – 7.08 (m, 3H), 6.97 – 6.89 (m, 3H).<sup>13</sup>C NMR (101 MHz, CDCl<sub>3</sub>)  $\delta$  161.88(d,  $J$  = 246.9Hz), 159.10, 149.44, 139.56, 139.45, 137.33, 135.46, 131.21(d,  $J$  = 8.0Hz), 130.53, 130.42, 128.63, 127.80, 125.33, 121.47, 115.03(d,  $J$  = 21.5Hz). HRMS (ESI): Calc'd for C<sub>17</sub>H<sub>13</sub>FN ([M+H])<sup>+</sup>: 250.1032; found, 250.0998. C<sub>17</sub>H<sub>12</sub>FN (249.0954).

**2-Di[2-(4-fluorophenyl)]phenylpyridine (4aj).** White solid. Mp = 102 °C. (172mg, 50%): NMR data were consistent with reported data.<sup>1</sup> <sup>1</sup>H NMR (400 MHz, DMSO) δ 8.32 (d, *J* = 4.7 Hz, 1H), 7.61 – 7.55 (m, 1H), 7.48 – 7.41 (m, 3H), 7.06 (m, 5H), 7.00 (t, *J* = 8.9 Hz, 4H), 6.92 (d, *J* = 7.8 Hz, 1H).<sup>13</sup>C NMR (101 MHz, CDCl<sub>3</sub>) δ 161.48(d, *J*=246.7Hz ), 158.60, 148.68, 140.90, 138.56, 137.41, 135.22, 131.15(d, *J*=8.1Hz), 129.52, 128.31, 126.71, 121.12, 114.72(d, *J*=21.4Hz).

**2-[2-(3-fluorophenyl)]phenylpyridine (3aa).** White solid. Mp = 90 °C. <sup>1</sup>H NMR (400 MHz, CDCl<sub>3</sub>) δ 8.65 – 8.60 (d, *J* = 4.6 Hz, 1H), 7.71 – 7.66 (m, 1H), 7.52 – 7.40 (m, 4H), 7.21 – 7.11 (m, 2H), 6.95 – 6.86 (m, 4H). <sup>13</sup>C NMR (101 MHz, CDCl<sub>3</sub>) δ 162.51 (d, *J*=246.5Hz), 158.89, 149.45, 143.68, 139.46, 139.39, 135.50, 130.57, 130.34, 129.53, 128.65, 128.01, 125.55, 125.24, 121.59, 116.54 (d, *J*=21.8Hz), 113.61 (d, *J*=21.2Hz). HRMS (ESI): Calc'd for C<sub>17</sub>H<sub>13</sub>FN ([M+H])<sup>+</sup> : 250.1032; found, 250.1001. C<sub>17</sub>H<sub>12</sub>FN (249.0954).

**2-Di[2-(3-fluorophenyl)]phenylpyridine (4aa).** White solid. Mp = 112 °C. <sup>1</sup>H NMR (400 MHz, CDCl<sub>3</sub>) δ 8.35 (d, *J* = 4.6 Hz, 1H), 7.53 (m, 1H), 7.47 – 7.43 (m, 2H), 7.35 (m, 1H), 7.11 (td, *J* = 7.9, 6.1 Hz, 2H), 6.97 (dd, *J* = 7.5, 4.9 Hz, 1H), 6.84 (m, 7H). <sup>13</sup>C NMR (101 MHz, CDCl<sub>3</sub>) δ 162.27 (d, *J*=246.6Hz), 158.16, 148.73, 143.63, 140.72, 138.42, 135.25, 129.71, 129.07, 128.40, 126.58, 125.41, 121.36, 116.53(d, *J*=22.0Hz), 113.34(d, *J*=21.0Hz). HRMS (ESI): Calc' d for C<sub>23</sub>H<sub>16</sub>F<sub>2</sub>N ([M+H])<sup>+</sup> : 344.1251; found, 344.1232. C<sub>23</sub>H<sub>15</sub>F<sub>2</sub>N (343.1173).

**2-[2-(4-trifluoromethylphenyl)]phenylpyridine. (3am).** Light yellow solid. Mp = 89 °C. (30mg, 10%): NMR data were consistent with reported data.<sup>1</sup> <sup>1</sup>H NMR (400

MHz, DMSO)  $\delta$  8.55 – 8.50 (d,  $J = 4.8$  Hz, 1H), 7.67 – 7.59 (m, 4H), 7.58 – 7.54 (m, 2H), 7.51 – 7.47 (m, 1H), 7.30 (d,  $J = 8.0$  Hz, 2H), 7.28 – 7.24 (m, 1H), 7.10 (d,  $J = 7.9$  Hz, 1H).  $^{13}\text{C}$  NMR (101 MHz, DMSO)  $\delta$  158.13, 149.20, 145.23, 139.35, 138.69, 136.10, 130.50, 130.38, 130.01, 128.73, 128.26, 127.12 (q,  $J = 32.0$  Hz), 124.91 (q,  $J = 37.0$  Hz), 124.73, 124.27 (q,  $J = 273.1$  Hz), 122.01.

**2-Di[2-(4-trifluoromethylphenyl)]phenylpyridine (4am).** White solid. Mp = 138 °C. (354mg, 80%):  $^1\text{H}$  NMR (400 MHz, DMSO)  $\delta$  8.31 (d,  $J = 4.8$  Hz, 1H), 7.71 – 7.64 (m, 1H), 7.59 – 7.53 (m, 6H), 7.48 (m, 1H), 7.26 (d,  $J = 8.1$  Hz, 4H), 7.09 (dd,  $J = 7.5, 4.9$  Hz, 1H), 6.98 (d,  $J = 7.8$  Hz, 1H).  $^{13}\text{C}$  NMR (101 MHz, DMSO)  $\delta$  157.68, 149.05, 145.60, 140.52, 138.86, 136.03, 130.52, 130.40, 129.18, 127.51 (q,  $J = 31.92$ ), 127.11, 125.05 (q,  $J = 3.74$  Hz), 124.69 (q,  $J = 273$ ), 122.35. HRMS (ESI): Calc'd for  $\text{C}_{25}\text{H}_{16}\text{F}_6\text{N}$  ( $[\text{M}+\text{H}]^+$ ): 444.1187; found, 444.1158.  $\text{C}_{25}\text{H}_{15}\text{F}_6\text{N}$  (443.1109).

**2-[2-(3-trifluoromethylphenyl)]phenylpyridine (3al).** Light yellow solid. Mp = 88 °C. (84mg, 28%):  $^1\text{H}$  NMR (400 MHz,  $\text{CDCl}_3$ )  $\delta$  8.60 (d,  $J = 4.3$  Hz, 1H), 7.72 – 7.66 (m, 1H), 7.52 – 7.49 (m, 2H), 7.46 (m, 3H), 7.43 – 7.41 (m, 1H), 7.34 – 7.30 (m, 2H), 7.12 (m, 1H), 6.92 (d,  $J = 7.9$  Hz, 1H).  $^{13}\text{C}$  NMR (101 MHz,  $\text{CDCl}_3$ )  $\delta$  157.76, 148.45, 141.01, 138.62, 138.05, 134.56, 131.94, 129.55, 129.39, 129.30, 127.75, 127.43, 127.26, 125.44 (q,  $J = 3.7$  Hz), 124.13, 122.96 (q,  $J = 243.5$  Hz), 122.38 (q,  $J = 3.8$  Hz), 120.60. HRMS (ESI): Calc'd for  $\text{C}_{18}\text{H}_{13}\text{F}_3\text{N}$  ( $[\text{M}+\text{H}]^+$ ): 300.1000; found, 300.0978.  $\text{C}_{18}\text{H}_{12}\text{F}_3\text{N}$  (299.0922).

**2-Di[2-(3-trifluoromethylphenyl)]phenylpyridine (4al).** Colorless oil. (292mg, 66%):  $^1\text{H}$  NMR (400 MHz,  $\text{CDCl}_3$ )  $\delta$  8.33 (m, 1H), 7.57 (m, 1H), 7.52 – 7.48 (m, 2H),

7.40 (d,  $J = 7.5$  Hz, 2H), 7.32 (m, 7H), 6.95 (m, 1H), 6.85 (d,  $J = 7.8$  Hz, 1H).  $^{13}\text{C}$  NMR (101 MHz,  $\text{CDCl}_3$ )  $\delta$  156.81, 147.79, 140.88, 139.53, 137.69, 134.37, 131.75, 129.05(q,  $J = 32.3$  Hz), 128.82, 127.67, 127.21, 125.61, 125.52(q,  $J = 3.8$  Hz), 122.92(q,  $J = 273.4$  Hz), 122.20(q,  $J = 4.0$  Hz), 120.41. HRMS (ESI): Calc'd for  $\text{C}_{25}\text{H}_{16}\text{F}_6\text{N}$  ( $[\text{M}+\text{H}]^+$ ): 444.1187; found, 444.1158.  $\text{C}_{25}\text{H}_{15}\text{F}_6\text{N}$  (443.1109).

**2-[2-(2-trifluoromethylphenyl)]phenylpyridine (3ak).** light yellow solid. Mp = 110 °C. (48mg, 16%):  $^1\text{H}$  NMR (400 MHz,  $\text{CDCl}_3$ )  $\delta$  8.57 (d,  $J = 4.3$  Hz, 1H), 7.76 (d,  $J = 7.7$  Hz, 1H), 7.71 – 7.66 (m, 1H), 7.52 (m, 1H), 7.43 (m, 1H), 7.38 – 7.31 (m, 4H), 7.09 – 7.01 (m, 2H), 6.89 (d,  $J = 7.9$  Hz, 1H).  $^{13}\text{C}$  NMR (101 MHz,  $\text{CDCl}_3$ )  $\delta$  157.41, 148.21, 139.19, 138.60, 136.73, 134.33, 132.07, 129.86, 129.40(q,  $J = 1.9$  Hz), 128.96, 127.73(q,  $J = 29.8$  Hz), 127.29, 126.58, 126.12, 125.13(q,  $J = 5.2$  Hz), 123.31, 123.16 (q,  $J = 275.1$  Hz), 120.32. HRMS (ESI) : Calc'd for  $\text{C}_{18}\text{H}_{13}\text{F}_3\text{N}$  ( $[\text{M}+\text{H}]^+$ ) : 300.1000; found, 300.0984.  $\text{C}_{18}\text{H}_{12}\text{F}_3\text{N}$  (299.0922).

**2-Di[2-(2-trifluoromethylphenyl)]phenylpyridine(4ak).** White solid. Mp = 109-110 °C. (80mg, 18%):HRMS (ESI) : Calc'd for  $\text{C}_{25}\text{H}_{16}\text{F}_6\text{N}$  ( $[\text{M}+\text{H}]^+$ ) : 444.1187; found, 444.1157.  $\text{C}_{25}\text{H}_{15}\text{F}_6\text{N}$  (443.1109).

**1-[2-(4-trifluoromethylphenyl)]phenylpyrazol (3bm).** Light yellow oil. (120mg, 42%):  $^1\text{H}$  NMR (400 MHz,  $\text{CDCl}_3$ )  $\delta$  7.63 – 7.59 (m, 2H), 7.51 (m, 4H), 7.47 (m, 1H), 7.21 (d,  $J = 8.1$  Hz, 2H), 7.12 (d,  $J = 2.3$  Hz, 1H), 6.23 (t,  $J = 2.1$  Hz, 1H).  $^{13}\text{C}$  NMR (101 MHz,  $\text{CDCl}_3$ )  $\delta$  141.20, 139.53, 137.55, 134.50, 130.18, 129.86, 128.44 (q,  $J = 32.6$  Hz), 128.10, 127.76, 127.57, 125.82, 124.34 (q,  $J = 3.7$  Hz), 123.06 (q,

$J=273.1\text{Hz}$ ), 105.79. HRMS (ESI): Calc'd for  $\text{C}_{16}\text{H}_{12}\text{F}_3\text{N}_2$  ( $[\text{M}+\text{H}]^+$ ) : 289.0953; found, 289.0941.  $\text{C}_{16}\text{H}_{11}\text{F}_3\text{N}_2$  (288.0874).

**1-Di[2-(4-trifluoromethylphenyl)]phenylpyrazol (4bm).** White solid. Mp = 132°C . (130mg, 30%):  $^1\text{H}$  NMR (400 MHz,  $\text{CDCl}_3$ )  $\delta$  7.62 (m, 1H), 7.54 (s, 1H), 7.53 – 7.51 (m, 1H), 7.50 (d,  $J = 8.3$  Hz, 4H), 7.39 (d,  $J = 1.8$  Hz, 1H), 7.23 (d,  $J = 8.2$  Hz, 4H), 7.06 (d,  $J = 2.4$  Hz, 1H), 6.09 (t,  $J = 2.1$  Hz, 1H).  $^{13}\text{C}$  NMR (101 MHz,  $\text{CDCl}_3$ )  $\delta$  141.01, 138.98, 138.20, 135.43, 131.34, 129.63, 128.52, 128.43 (q,  $J=32.6\text{Hz}$ ), 127.54, 124.08 (q,  $J=3.7\text{Hz}$ ), 123.07 (q,  $J=273.1\text{Hz}$ ), 105.80. HRMS (ESI): Calc'd for  $\text{C}_{23}\text{H}_{15}\text{F}_6\text{N}_2$  ( $[\text{M}+\text{H}]^+$ ) : 433.1139; found, 433.1120.  $\text{C}_{23}\text{H}_{14}\text{F}_6\text{N}_2$  (432.1061).

**2-[2-(4-trifluoromethylphenyl)]phenyl-2-oxazoline (3cm).** (128mg, 44%): Yellow oil.  $^1\text{H}$  NMR (400 MHz,  $\text{CDCl}_3$ )  $\delta$  7.82 (d,  $J = 7.7$  Hz, 1H), 7.64 (d,  $J = 8.1$  Hz, 2H), 7.53 – 7.41 (m, 4H), 7.36 (d,  $J = 7.6$  Hz, 1H), 4.17 – 4.09 (m, 2H), 3.91 (m, 2H).  $^{13}\text{C}$  NMR (101 MHz,  $\text{CDCl}_3$ )  $\delta$  164.38, 143.99, 139.43, 129.70, 129.27, 128.24(q,  $J=32.3\text{Hz}$ ), 128.05, 127.69, 126.86, 126.46, 123.92(q,  $J = 3.7\text{Hz}$ ), 123.26(q,  $J = 272.7\text{Hz}$ ), 66.78, 54.03. HRMS (ESI): Calc'd for  $\text{C}_{16}\text{H}_{13}\text{F}_3\text{NO}$  ( $[\text{M}+\text{H}]^+$ ) : 292.0949; found, 292.0934.  $\text{C}_{16}\text{H}_{12}\text{F}_3\text{NO}$  (291.0871).

**2-Di[2-(4-trifluoromethylphenyl)]phenyl-2-oxazoline (4cm).** White solid. Sublimation. (57mg, 13%):  $^1\text{H}$  NMR (400 MHz,  $\text{CDCl}_3$ )  $\delta$  7.66 (d,  $J = 8.2$  Hz, 4H), 7.61 – 7.53 (m, 5H), 7.42 (d,  $J = 7.7$  Hz, 2H), 3.90 (t,  $J = 9.5$  Hz, 2H), 3.61 (t,  $J = 9.5$  Hz, 2H).  $^{13}\text{C}$  NMR (101 MHz,  $\text{CDCl}_3$ )  $\delta$  162.27, 143.21, 143.19, 140.13, 129.01, 128.61 (q,  $J=32.6\text{Hz}$ ), 128.39, 127.88, 126.49, 124.05 (q,  $J=3.7\text{Hz}$ ), 123.19 (q,

$J=273.1\text{Hz}$ ), 66.50, 54.06. HRMS (ESI): Calc'd for  $\text{C}_{23}\text{H}_{16}\text{F}_6\text{NO}$  ( $[\text{M}+\text{H}]^+$ ) : 436.1136; found, 436.1120.  $\text{C}_{23}\text{H}_{15}\text{F}_6\text{NO}$  (435.1058).

**2-[2-(4-trifluoromethylphenyl)]phenyl-beta-picoline (3fm).** Yellow oil. (238mg, 76%): NMR data were consistent with reported data.<sup>2</sup>  $^1\text{H}$  NMR (400 MHz,  $\text{CDCl}_3$ )  $\delta$  8.48 (d,  $J = 4.0$  Hz, 1H), 7.51 – 7.40 (m, 6H), 7.34 (d,  $J = 7.3$  Hz, 1H), 7.24 (d,  $J = 8.1$  Hz, 2H), 7.12 (m, 1H), 1.78 (s, 3H).  $^{13}\text{C}$  NMR (101 MHz,  $\text{CDCl}_3$ )  $\delta$  157.76, 145.62, 143.71, 138.39, 138.20, 136.76, 130.50, 129.01, 128.65, 128.45, 127.67 (q,  $J=32.6\text{Hz}$ ), 127.54, 127.20, 123.70 (q,  $J=3.7\text{Hz}$ ), 123.16 (q,  $J=273.1\text{Hz}$ ), 121.40, 17.79.

**2-Di[2-(4-trifluoromethylphenyl)]phenyl-beta-picoline (4fm).** (18mg, 4%):  $^1\text{H}$  NMR (400 MHz,  $\text{CDCl}_3$ )  $\delta$  8.27 (d,  $J = 3.8$  Hz, 1H), 7.62 – 7.57 (m, 1H), 7.48 (d,  $J = 7.5$  Hz, 2H), 7.41 (d,  $J = 8.1$  Hz, 4H), 7.26 – 7.19 (m, 5H), 6.98 (m, 1H), 1.78 (s, 3H).  $^{13}\text{C}$  NMR (101 MHz,  $\text{CDCl}_3$ )  $\delta$  155.90, 145.00, 143.59, 139.46, 136.64, 128.88, 128.77, 128.52, 127.86, 127.69, 127.54, 123.59 (q,  $J=3.7\text{Hz}$ ), 123.09 (q,  $J=273.1\text{Hz}$ ), 121.46, 17.68. HRMS (ESI): Calc'd for  $\text{C}_{26}\text{H}_{18}\text{F}_6\text{N}$  ( $[\text{M}+\text{H}]^+$ ) : 458.1343; found, 458.1314.  $\text{C}_{26}\text{H}_{17}\text{F}_6\text{N}$  (457.1265).

**2-[(2-(4-trifluoromethylphenyl)-4-methoxyl)phenyl]pyridine (3dm).** White solid. Mp = 93-94 °C. (66mg, 20%):  $^1\text{H}$  NMR (400 MHz,  $\text{CDCl}_3$ )  $\delta$  8.58 (d,  $J = 4.8$  Hz, 1H), 7.66 (d,  $J = 8.5$  Hz, 1H), 7.50 (d,  $J = 8.1$  Hz, 2H), 7.40 (m, 1H), 7.28 (d,  $J = 8.1$  Hz, 2H), 7.12 – 7.07 (m, 1H), 7.05 (m, 1H), 6.94 (d,  $J = 2.6$  Hz, 1H), 6.85 (d,  $J = 7.9$  Hz, 1H), 3.88 (s, 3H).  $^{13}\text{C}$  NMR (101 MHz,  $\text{CDCl}_3$ )  $\delta$  158.73, 157.40, 148.40, 144.09, 139.48, 134.48, 131.25, 131.08, 128.84, 127.92(q,  $J=32.5\text{Hz}$ ), 124.14, 124.02(q,

$J=3.7\text{Hz}$ ), 123.18(q,  $J=273.1\text{Hz}$ ), 120.22, 114.82, 112.71, 54.43. HRMS (ESI): Calc'd for  $\text{C}_{19}\text{H}_{15}\text{F}_3\text{NO}$  ( $[\text{M}+\text{H}]^+$ ): 330.1106; found, 330.1074.  $\text{C}_{19}\text{H}_{14}\text{F}_3\text{NO}$  (329.1027).

**2-[2,2'-di(4-trifluoromethylphenyl)-4-methoxyl]phenylpyridine (4dm).** pale yellow solid. Mp = 176 °C. (340mg, 72%):  $^1\text{H}$  NMR (400 MHz,  $\text{CDCl}_3$ )  $\delta$  8.31 (d,  $J = 4.2$  Hz, 1H), 7.43 (d,  $J = 8.1$  Hz, 4H), 7.33 (t,  $J = 7.5$  Hz, 1H), 7.22 (d,  $J = 8.0$  Hz, 4H), 7.00 (s, 2H), 6.99 – 6.93 (m, 1H), 6.82 (d,  $J = 7.8$  Hz, 1H), 3.92 (s, 3H).  $^{13}\text{C}$  NMR (101 MHz,  $\text{CDCl}_3$ )  $\delta$  158.11, 156.64, 147.76, 143.98, 141.11, 134.33, 130.36, 128.74, 127.72 (q,  $J=32.5\text{Hz}$ ), 125.98, 123.65 (q,  $J=3.7\text{Hz}$ ), 123.16 (q,  $J=273.1\text{Hz}$ ), 120.29, 114.35, 54.55. HRMS (ESI): Calc'd for  $\text{C}_{26}\text{H}_{18}\text{F}_6\text{NO}$  ( $[\text{M}+\text{H}]^+$ ): 474.1293; found, 474.1275.  $\text{C}_{26}\text{H}_{17}\text{F}_6\text{NO}$  (473.1214).

**2-[(2-(4-trifluoromethylphenyl)-4-trifluoromethyl]phenylpyridine (3em).** White solid. Mp = 40.5-41 °C. (191mg, 52%):  $^1\text{H}$  NMR (400 MHz,  $\text{CDCl}_3$ )  $\delta$  8.63 (d,  $J = 4.8\text{Hz}$ , 1H), 7.83 (d,  $J = 8.1$  Hz, 1H), 7.76 (s, 1H), 7.70 (s, 1H), 7.53 (d,  $J = 8.1$  Hz, 2H), 7.48 (m, 1H), 7.32 – 7.27 (m, 2H), 7.18 (m, 1H), 6.96 (d,  $J = 7.9$  Hz, 1H).  $^{13}\text{C}$  NMR (101 MHz,  $\text{CDCl}_3$ )  $\delta$  156.36, 148.74, 142.71, 141.90, 138.89, 134.89, 130.30, 129.83 (q,  $J=32.6\text{Hz}$ ), 128.86, 128.55 (q,  $J=32.6\text{Hz}$ ), 126.20 (q,  $J=3.6\text{Hz}$ ), 124.23 (q,  $J=3.7\text{Hz}$ ), 124.08, 123.97 (q,  $J=3.7\text{Hz}$ ), 123.06 (q,  $J=273.0\text{Hz}$ ), 122.94 (q,  $J=273.1\text{Hz}$ ), 121.34. HRMS (ESI): Calc'd for  $\text{C}_{19}\text{H}_{12}\text{F}_6\text{N}$  ( $[\text{M}+\text{H}]^+$ ): 368.0874; found, 368.0846.  $\text{C}_{19}\text{H}_{11}\text{F}_6\text{N}$  (367.0796).

**2-[2,2'-di(4-trifluoromethylphenyl)-4-Trifluoromethyl]phenylpyridine (4em).** White solid. Mp = 130-131 °C. (164mg, 32%):  $^1\text{H}$  NMR (400 MHz,  $\text{CDCl}_3$ )  $\delta$  8.36 (d,  $J = 4.4$  Hz, 1H), 7.74 (s, 2H), 7.46 (d,  $J = 8.2$  Hz, 4H), 7.39 (m, 1H), 7.23 (d,  $J = 8.1$

Hz, 4H), 7.06 – 7.00 (m, 1H), 6.87 (d,  $J = 7.8$  Hz, 1H).  $^{13}\text{C}$  NMR (101 MHz,  $\text{CDCl}_3$ )  $\delta$  155.49, 148.06, 142.52, 140.70, 140.64, 134.72, 129.87 (q,  $J=33.0\text{Hz}$ ), 128.74, 128.37 (q,  $J=32.7\text{Hz}$ ), 125.56 (q,  $J=3.6\text{Hz}$ ), 125.34, 123.92 (q,  $J=3.6\text{Hz}$ ), 122.95 (q,  $J=273.1\text{Hz}$ ), 122.68 (q,  $J=273.6\text{Hz}$ ), 121.13. HRMS (ESI): Calc'd for  $\text{C}_{26}\text{H}_{15}\text{F}_9\text{N}$  ( $[\text{M}+\text{H}]^+$ ): 512.1061; found, 512.1033.  $\text{C}_{26}\text{H}_{14}\text{F}_9\text{N}$  (511.0983).

**2,2'-di(pyridin-2-yl)-1,1'-biphenyl:**  $^1\text{H}$  NMR (400 MHz,  $\text{CDCl}_3$ )  $\delta$  8.33 (d,  $J = 4.7$  Hz, 2H), 7.55 – 7.52 (m, 2H), 7.45 – 7.39 (m, 6H), 7.33 (td,  $J = 7.8, 1.7$  Hz, 2H), 7.05 – 7.00 (m, 2H), 6.76 (d,  $J = 7.9$  Hz, 2H).  $^{13}\text{C}$  NMR (101 MHz,  $\text{CDCl}_3$ )  $\delta$  156.78, 147.76, 138.73, 138.56, 134.44, 130.27, 129.01, 127.65, 126.79, 123.47, 120.27. HRMS (ESI): Calc'd for  $\text{C}_{22}\text{H}_{17}\text{N}_2$  ( $[\text{M}+\text{H}]^+$ ): 309.1392; found, 309.1381.  $\text{C}_{22}\text{H}_{16}\text{N}_2$  (308.1313).

**2'-(pyridin-2-yl)-[1,1'-biphenyl]-4-carbonitrile (3au).** White solid. Mp = 118 °C. (140mg, 55%):  $^1\text{H}$  NMR (400 MHz,  $\text{CDCl}_3$ )  $\delta$  8.59 (d,  $J = 4.8$  Hz, 1H), 7.72 – 7.65 (m, 1H), 7.57 – 7.46 (m, 5H), 7.41 (m, 1H), 7.25 (d,  $J = 8.8$  Hz, 2H), 7.19 – 7.12 (m, 1H), 6.96 (d,  $J = 7.9$  Hz, 1H).  $^{13}\text{C}$  NMR (101 MHz,  $\text{CDCl}_3$ )  $\delta$  157.55, 148.55, 145.33, 138.58, 137.76, 134.75, 130.82, 129.68, 129.30, 129.20, 127.79, 127.68, 124.02, 120.77, 117.89, 109.41. HRMS (ESI): Calc'd for  $\text{C}_{18}\text{H}_{13}\text{N}_2$  ( $[\text{M}+\text{H}]^+$ ): 257.1079; found, 257.1064.  $\text{C}_{18}\text{H}_{12}\text{N}_2$  (256.1000).

**2'-(pyridin-2-yl)-[1,1':3',1''-terphenyl]-4,4''-dicarbonitrile (4au).** White solid. Mp = 166 °C. (35mg, 10%):  $^1\text{H}$  NMR (400 MHz,  $\text{CDCl}_3$ )  $\delta$  8.36 – 8.30 (d,  $J = 4.8$  Hz, 1H), 7.60 (m, 1H), 7.50 – 7.44 (m, 6H), 7.37 (t,  $J = 7.7$  Hz, 1H), 7.21 – 7.16 (m, 4H), 7.02 (m, 1H), 6.86 – 6.81 (d,  $J = 8.0$  Hz, 1H).  $^{13}\text{C}$  NMR (101 MHz,  $\text{CDCl}_3$ )  $\delta$  156.32,



148.04, 144.94, 139.34, 137.30, 134.57, 130.59, 129.19, 129.07, 127.81, 125.60, 120.78, 117.75, 109.46. HRMS (ESI): Calc' d for  $C_{25}H_{15}N_3Na$  ( $[M+Na]^+$ ): 380.1164; found, 380.1165.  $C_{25}H_{15}N_3$  (357.1266).

**2-(5-methyl-4'-(trifluoromethyl)-[1,1'-biphenyl]-2-yl)pyridine (3gm).** Colorless oil. (187mg, 60%):  $^1H$  NMR (400 MHz,  $CDCl_3$ )  $\delta$  8.59 (d,  $J = 4.3$  Hz, 1H), 7.60 (d,  $J = 7.8$  Hz, 1H), 7.48 (d,  $J = 8.1$  Hz, 2H), 7.41 (td,  $J = 7.7, 1.8$  Hz, 1H), 7.31 (d,  $J = 7.8$  Hz, 1H), 7.29 – 7.21 (m, 3H), 7.09 (m, 1H), 6.88 (d,  $J = 7.9$  Hz, 1H), 2.44 (s, 3H).  $^{13}C$  NMR (101 MHz,  $CDCl_3$ )  $\delta$  157.74, 148.45, 144.26, 138.01, 137.57, 135.83, 134.47, 130.08, 129.61, 128.88, 128.04, 127.69 (q,  $J=32.5$ Hz) , 124.15, 123.93(q,  $J=3.8$ Hz), 123.23(q,  $J=273.1$ Hz), 120.40, 20.15. HRMS (ESI): Calc' d for  $C_{19}H_{15}F_3N$  ( $[M+H]^+$ ): 314.1157; found, 314.1142.  $C_{19}H_{14}F_3N$  (313.1078).

**2-(5'-methyl-4,4''-bis(trifluoromethyl)-[1,1':3',1''-terphenyl]-2'-yl)pyridine (4gm).** White solid. Mp = 145-146 °C. (90mg, 20%):  $^1H$  NMR (400 MHz,  $CDCl_3$ )  $\delta$  8.31 (d,  $J = 4.3$  Hz, 1H), 7.42 (d,  $J = 8.2$  Hz, 4H), 7.36 – 7.28 (m, 3H), 7.20 (d,  $J = 8.0$  Hz, 4H), 6.99 – 6.93 (m, 1H), 6.83 (d,  $J = 7.8$  Hz, 1H), 2.50 (s, 3H).  $^{13}C$  NMR (101 MHz,  $CDCl_3$ )  $\delta$  156.87, 147.80, 144.09, 139.61, 137.40, 134.76, 134.33, 129.66, 128.79, 127.54 (q,  $J=32.5$ Hz) , 125.76, 123.59(q,  $J=3.7$ Hz), 123.16(q,  $J=273.0$ Hz), 120.37, 20.19. HRMS (ESI): Calc' d for  $C_{26}H_{18}F_6N$  ( $[M+H]^+$ ): 458.1343; found, 458.1245.  $C_{26}H_{17}F_6N$  (457.1265).

**2-(3,5-difluoro-4'-(trifluoromethyl)-[1,1'-biphenyl]-2-yl)pyridine (hm).** Colorless oil. (105mg, 32%):  $^1H$  NMR (400 MHz,  $CDCl_3$ )  $\delta$  8.56 (d,  $J = 4.8$  Hz, 1H), 7.59 (t,  $J = 7.7$  Hz, 1H), 7.45 (d,  $J = 8.1$  Hz, 2H), 7.22 – 7.16 (m, 3H), 7.12 (d,  $J = 7.8$  Hz,

1H), 7.03 – 6.94 (m, 2H). <sup>13</sup>C NMR (101 MHz, CDCl<sub>3</sub>) δ 161.72 (dd, *J* = 164.0, 13.0 Hz), 159.31(dd, *J* = 163.7, 13.0 Hz), 151.72, 148.48, 142.12(dd, *J* = 9.5, 4.4 Hz), 141.72, 135.08, 128.58, 128.47 (q, *J* = 32.5 Hz), 125.20, 123.97 (q, *J* = 3.7 Hz), 123.19(dd, *J* = 15.9, 3.8 Hz), 122.95(q, *J* = 273.2 Hz), 121.44, 111.99(dd, *J* = 22.0, 3.5 Hz), 102.75(dd, *J* = 26.8, 25.2 Hz). HRMS (ESI): Calc' d for C<sub>18</sub>H<sub>11</sub>F<sub>5</sub>N ([M+H]<sup>+</sup> : 336.0812; found, 336.0791. C<sub>18</sub>H<sub>10</sub>F<sub>5</sub>N (335.0733).

[1] J. Zhang, Q. Yang, Z. Zhu, M. L. Yuan, H. Y. Fu, X. L. Zheng, H. Chen, R. X. Li, *Eur. J. Org. Chem*, **2012**, 34, 6702-6706.

[2] D. Kalyani, N. R. Deprez, L. V. Desai, M. S. Sanford. *J. Am. Chem. Soc.* **2005**, 127, 7330-7331.

## Mass Spectrum of the dehydrogenative cross-coupling products of 3aa:

### (1) DCCP - 5aa MS(E+)

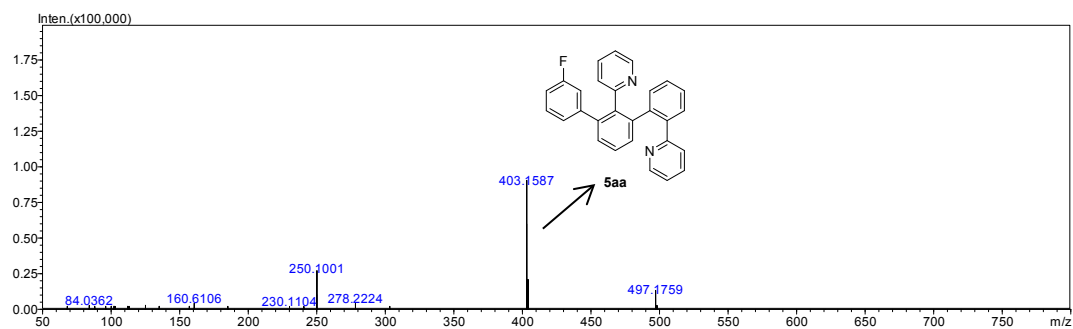

### (2) DCCP - 6aa MS(E+)

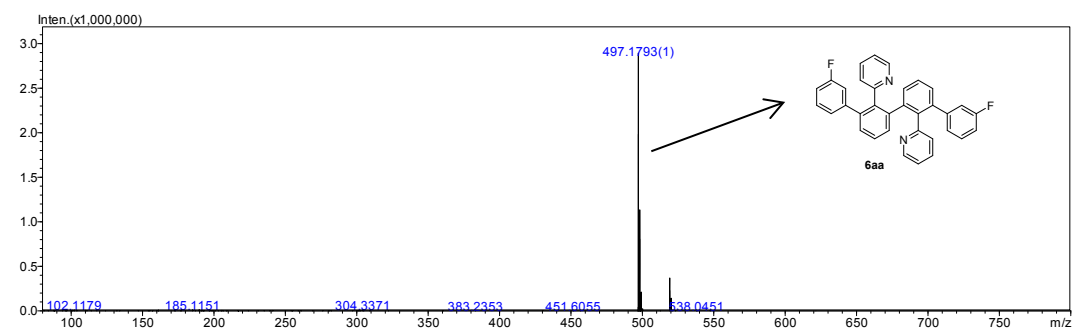

### (3) DCCP - 7aa MS(E+)

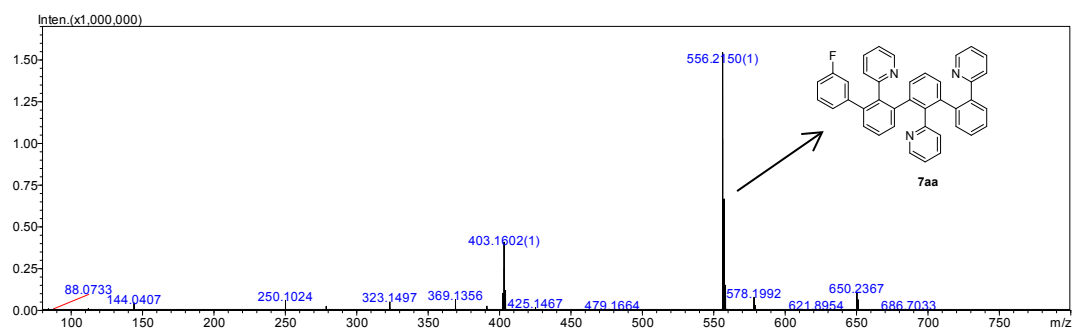

## Mass Spectrum of the the oligomerizations of 2-phenylpyridine

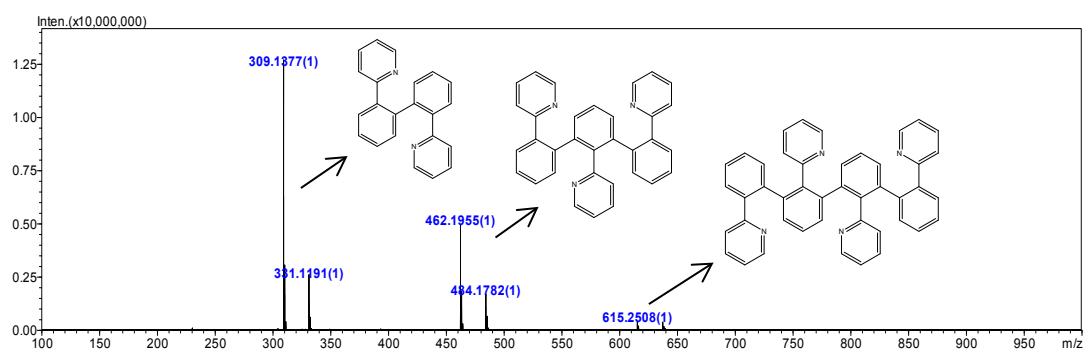

# <sup>1</sup>H NMR Spectrum of the Compound 3af

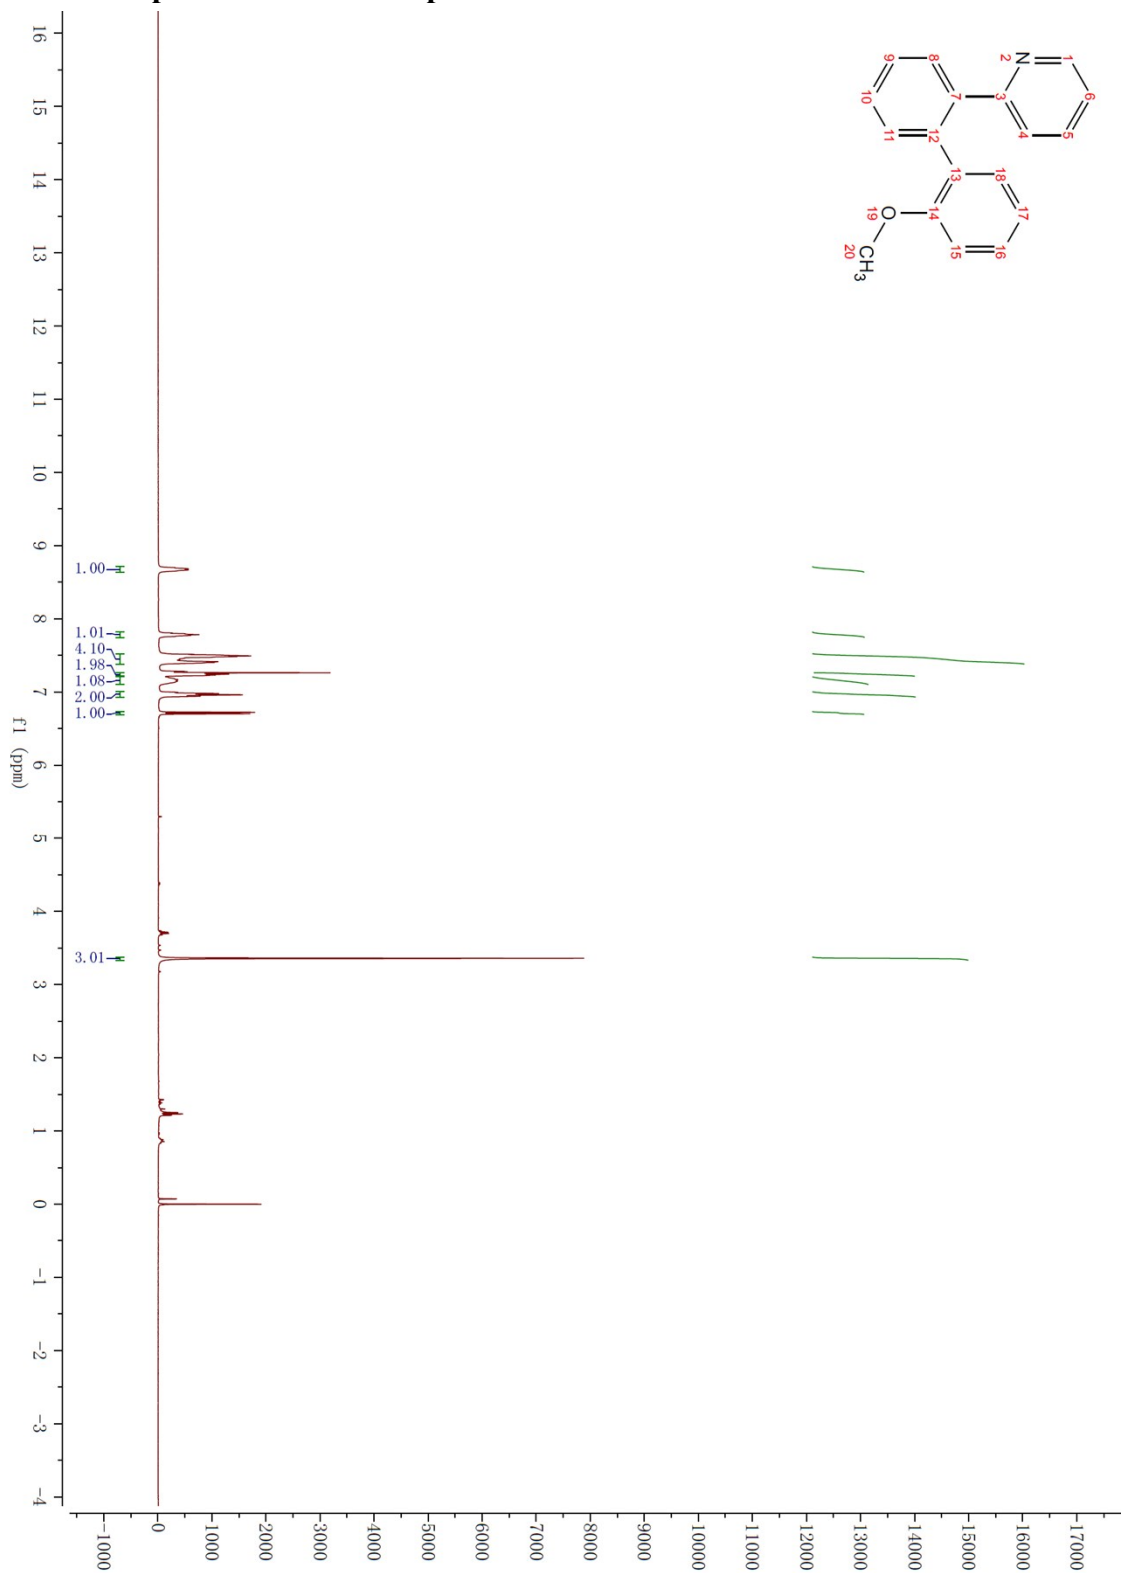

# <sup>13</sup>C NMR Spectrum of the Compound 3af

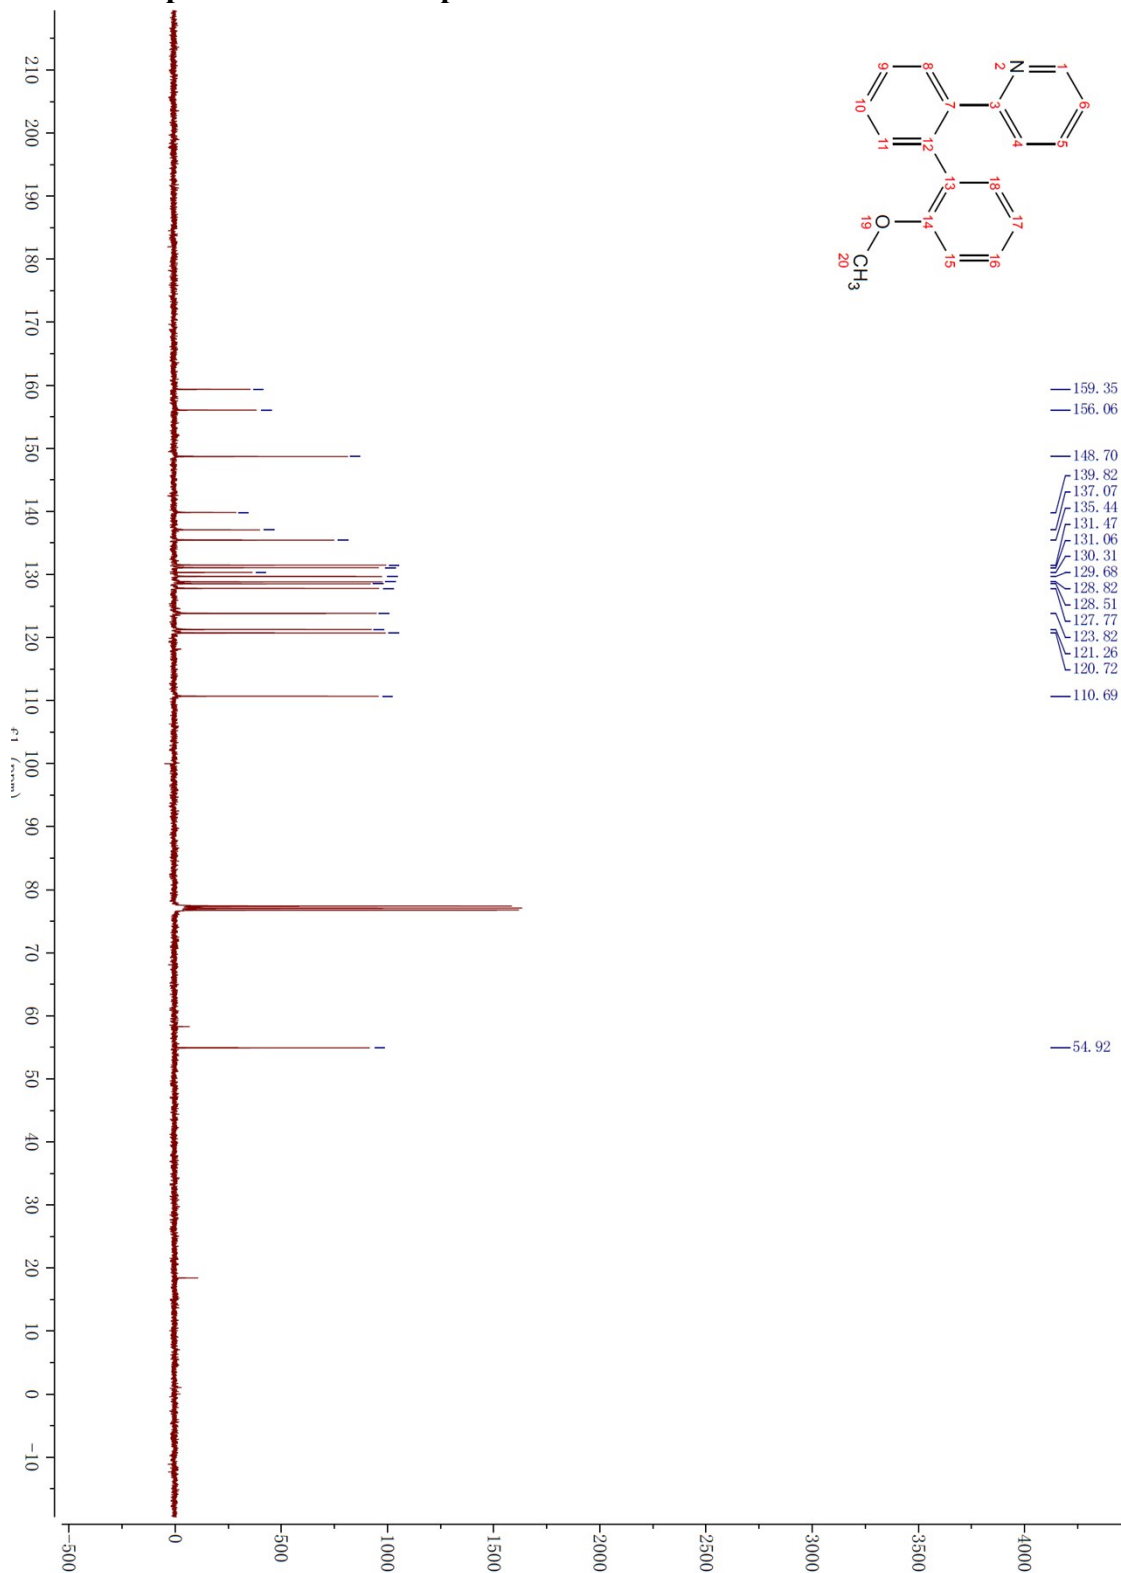

# <sup>1</sup>H NMR Spectrum of the Compound 4af

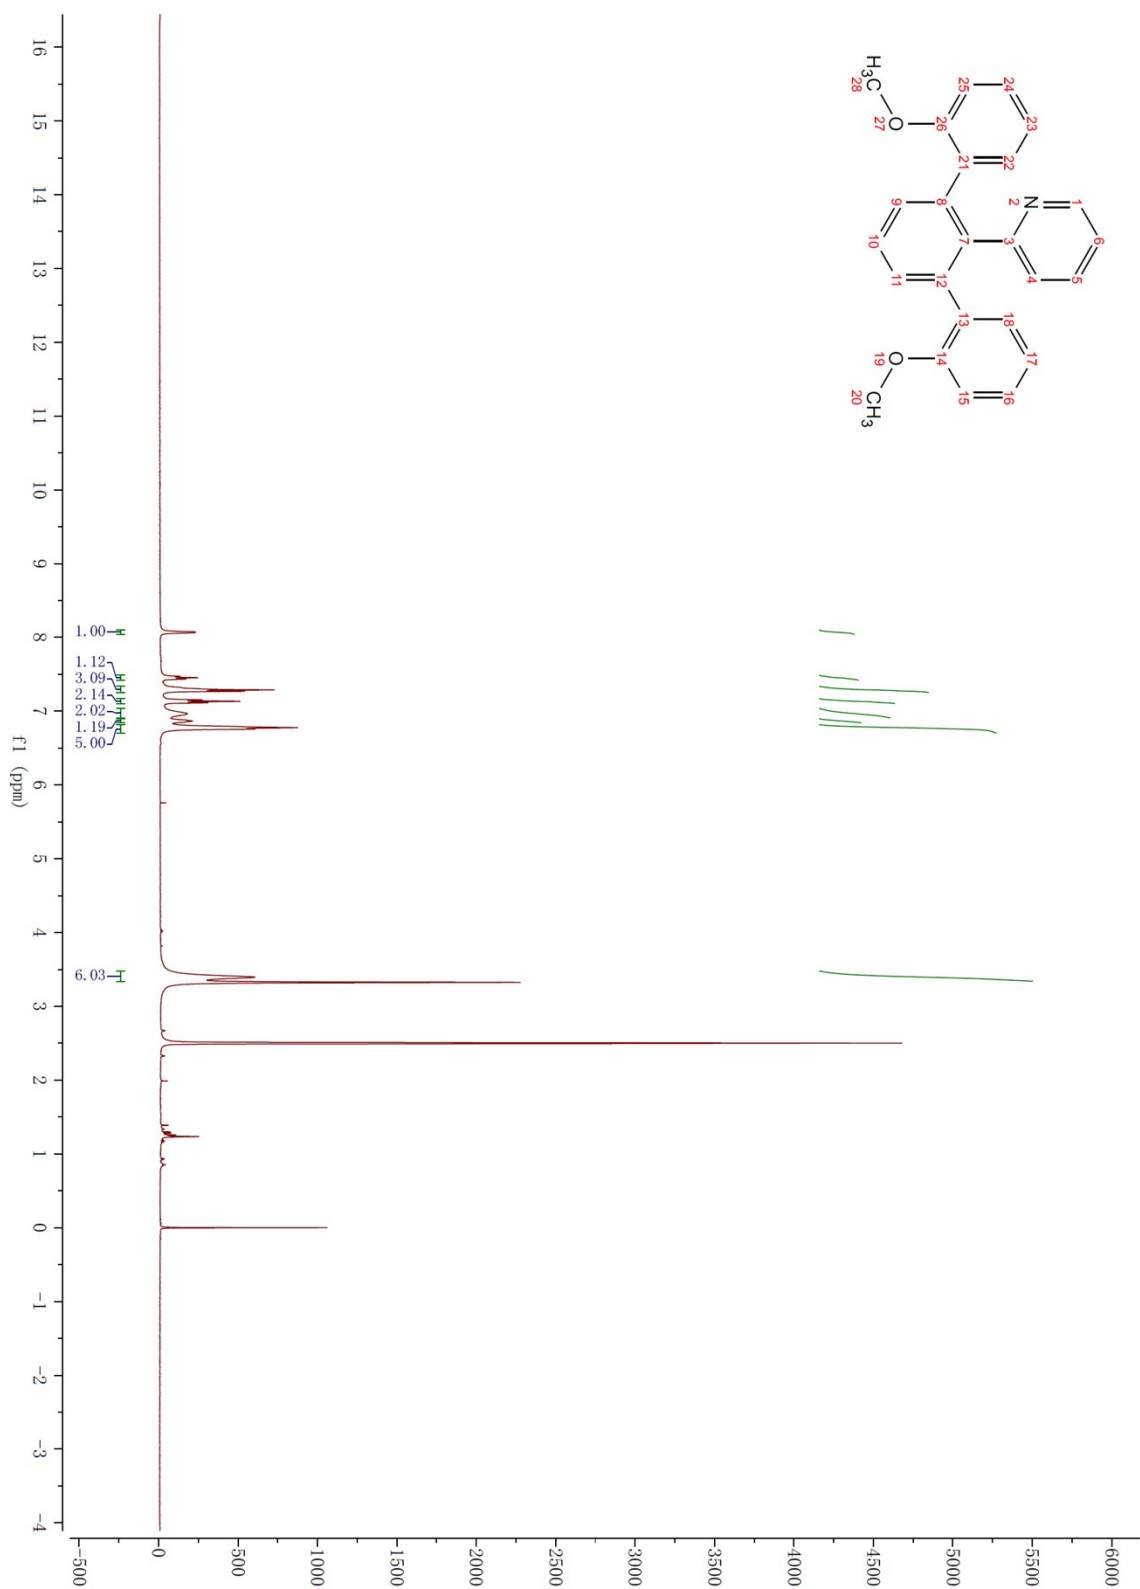

# <sup>13</sup>C NMR Spectrum of the Compound 4af

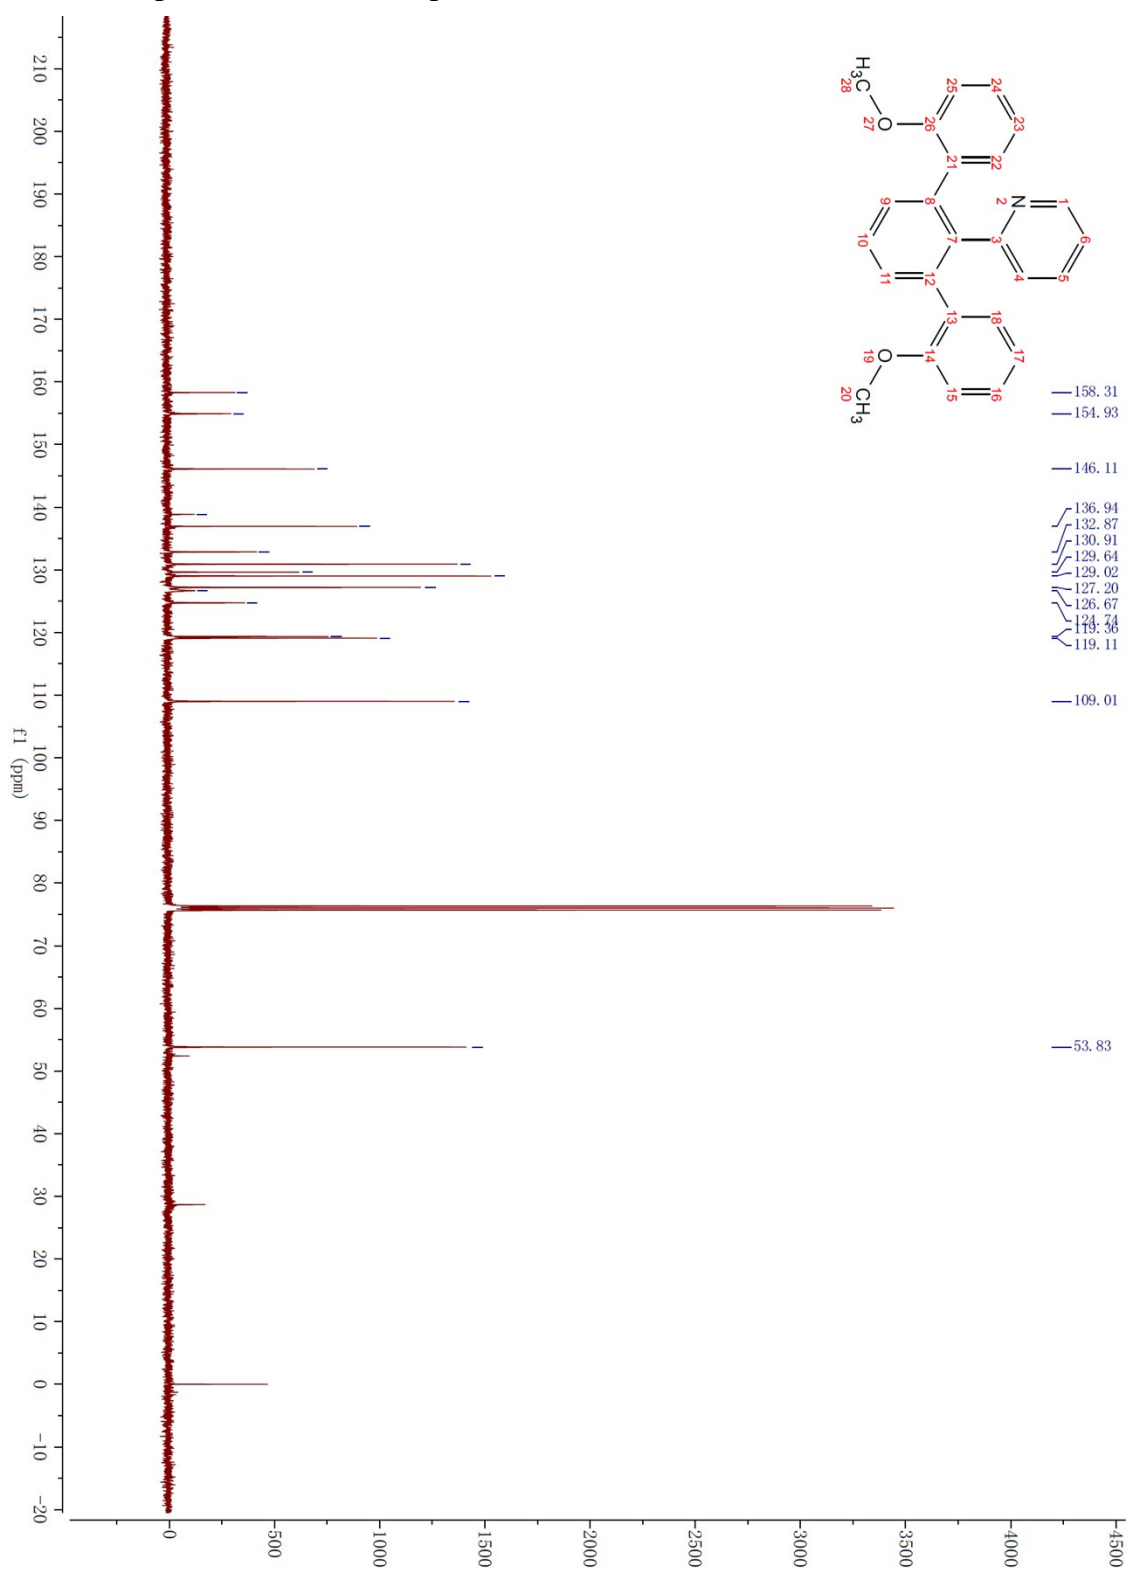

# <sup>1</sup>H NMR Spectrum of the Compound 3ac

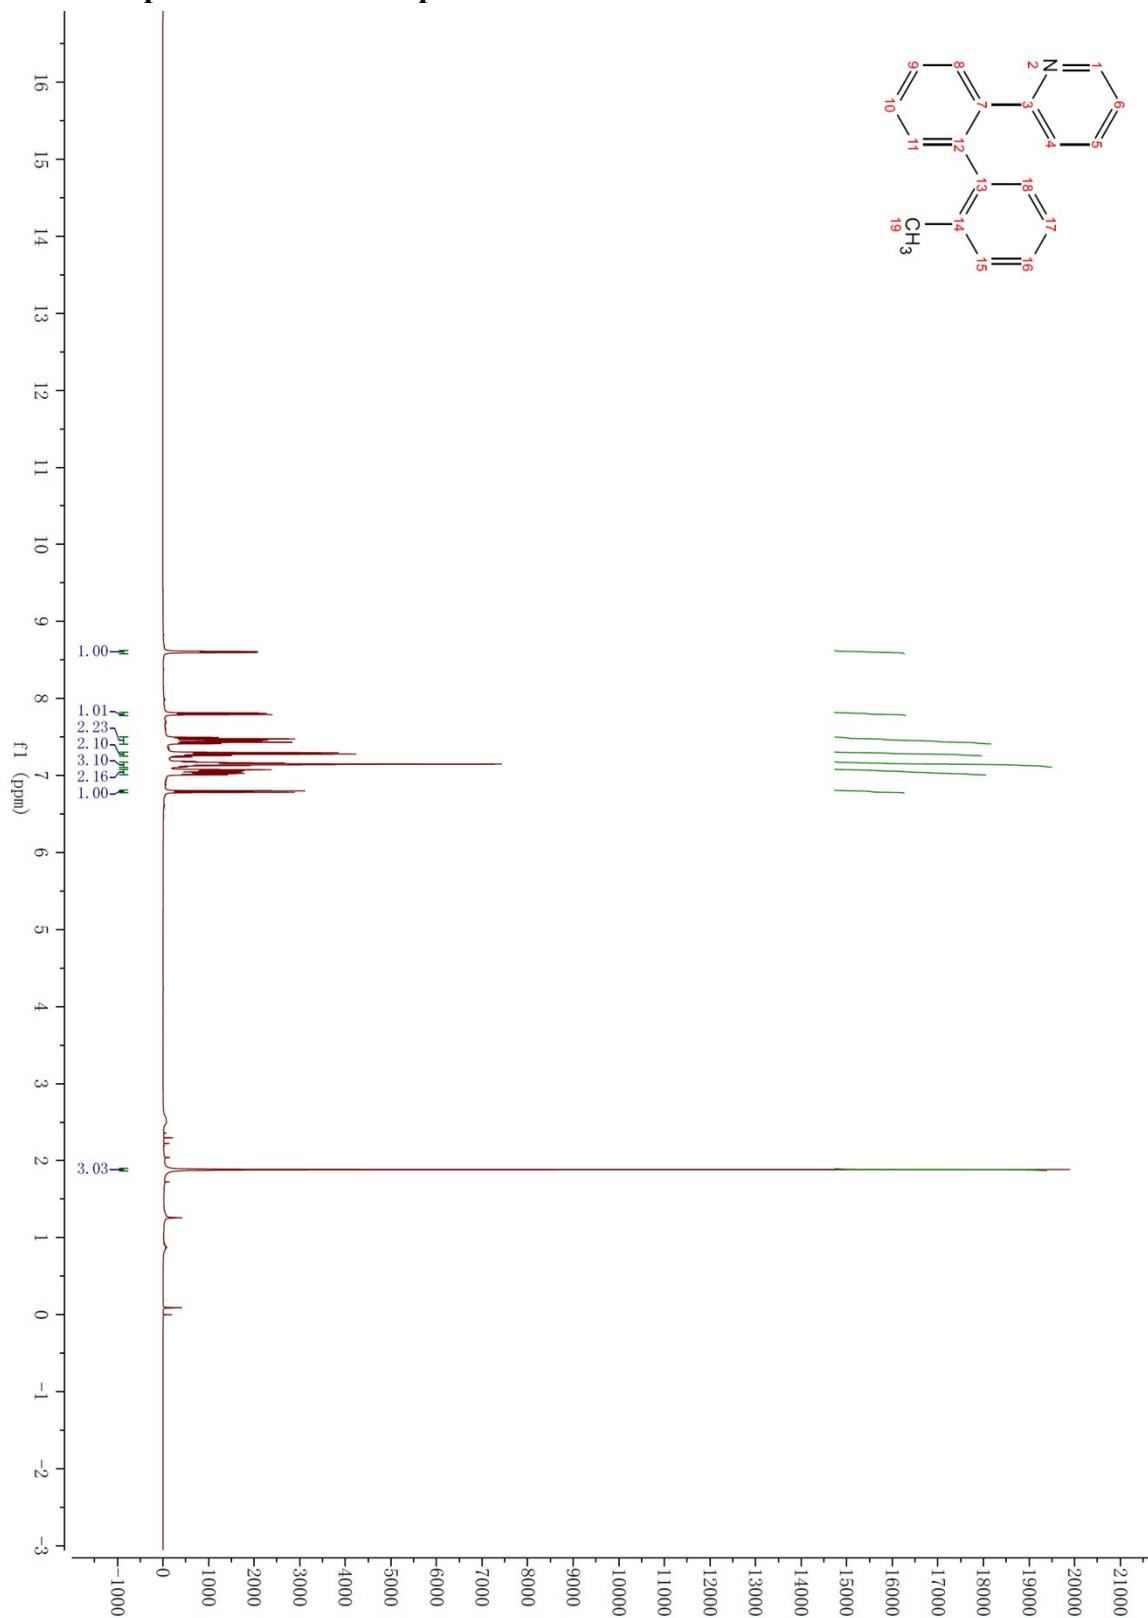



# <sup>13</sup>C NMR Spectrum of the Compound 3ac

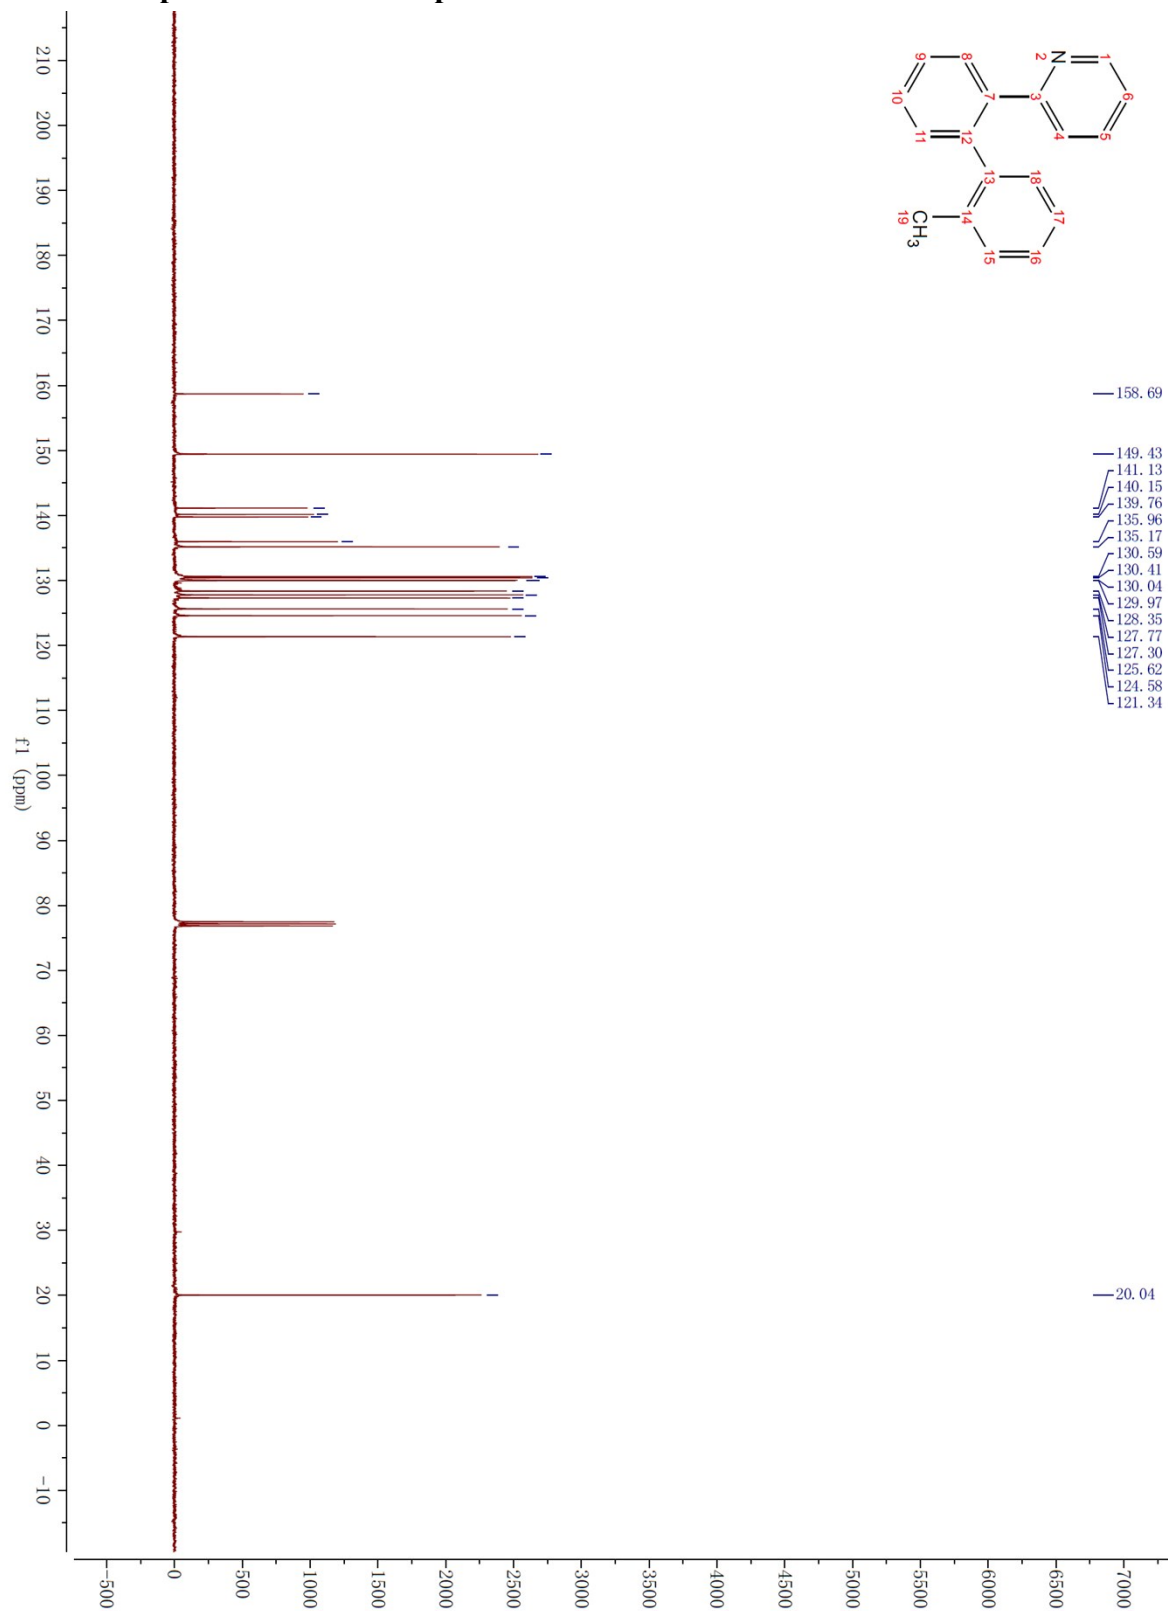

# <sup>1</sup>H NMR Spectrum of the Compound 4ac

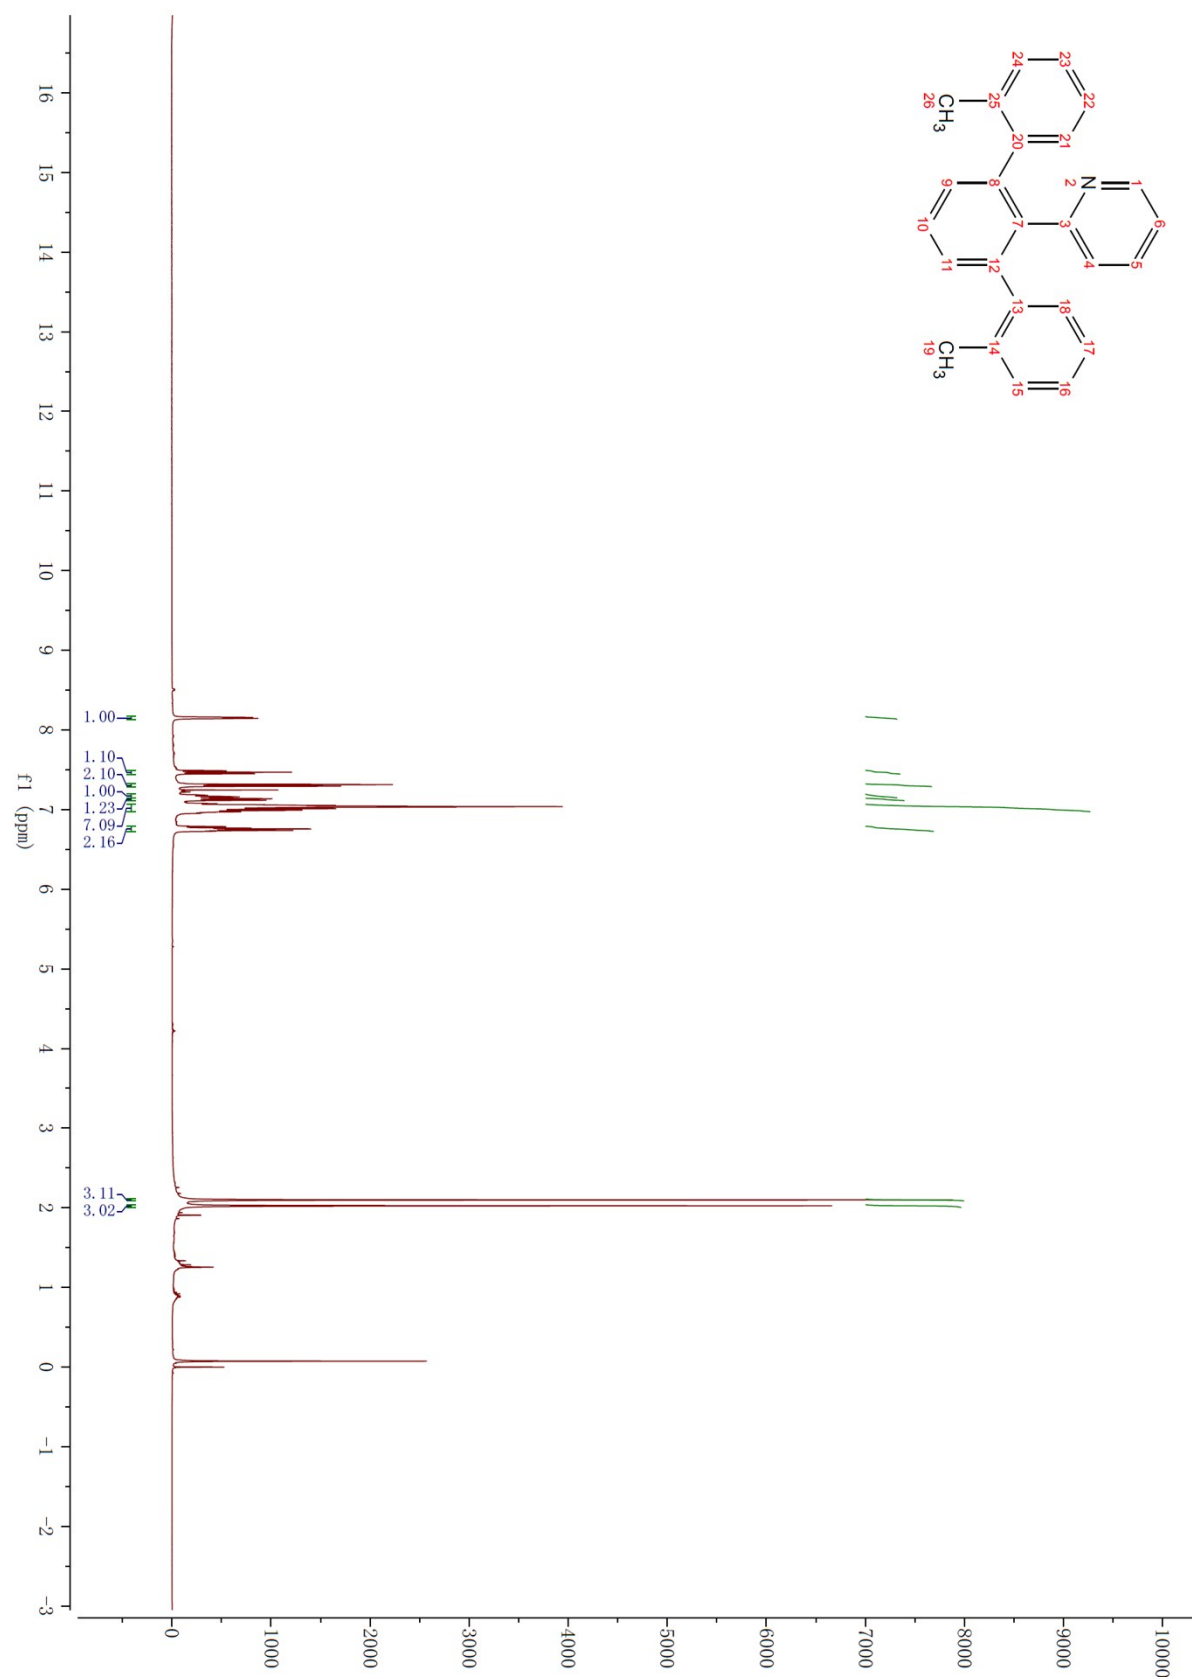

# <sup>13</sup>C NMR Spectrum of the Compound 4ac

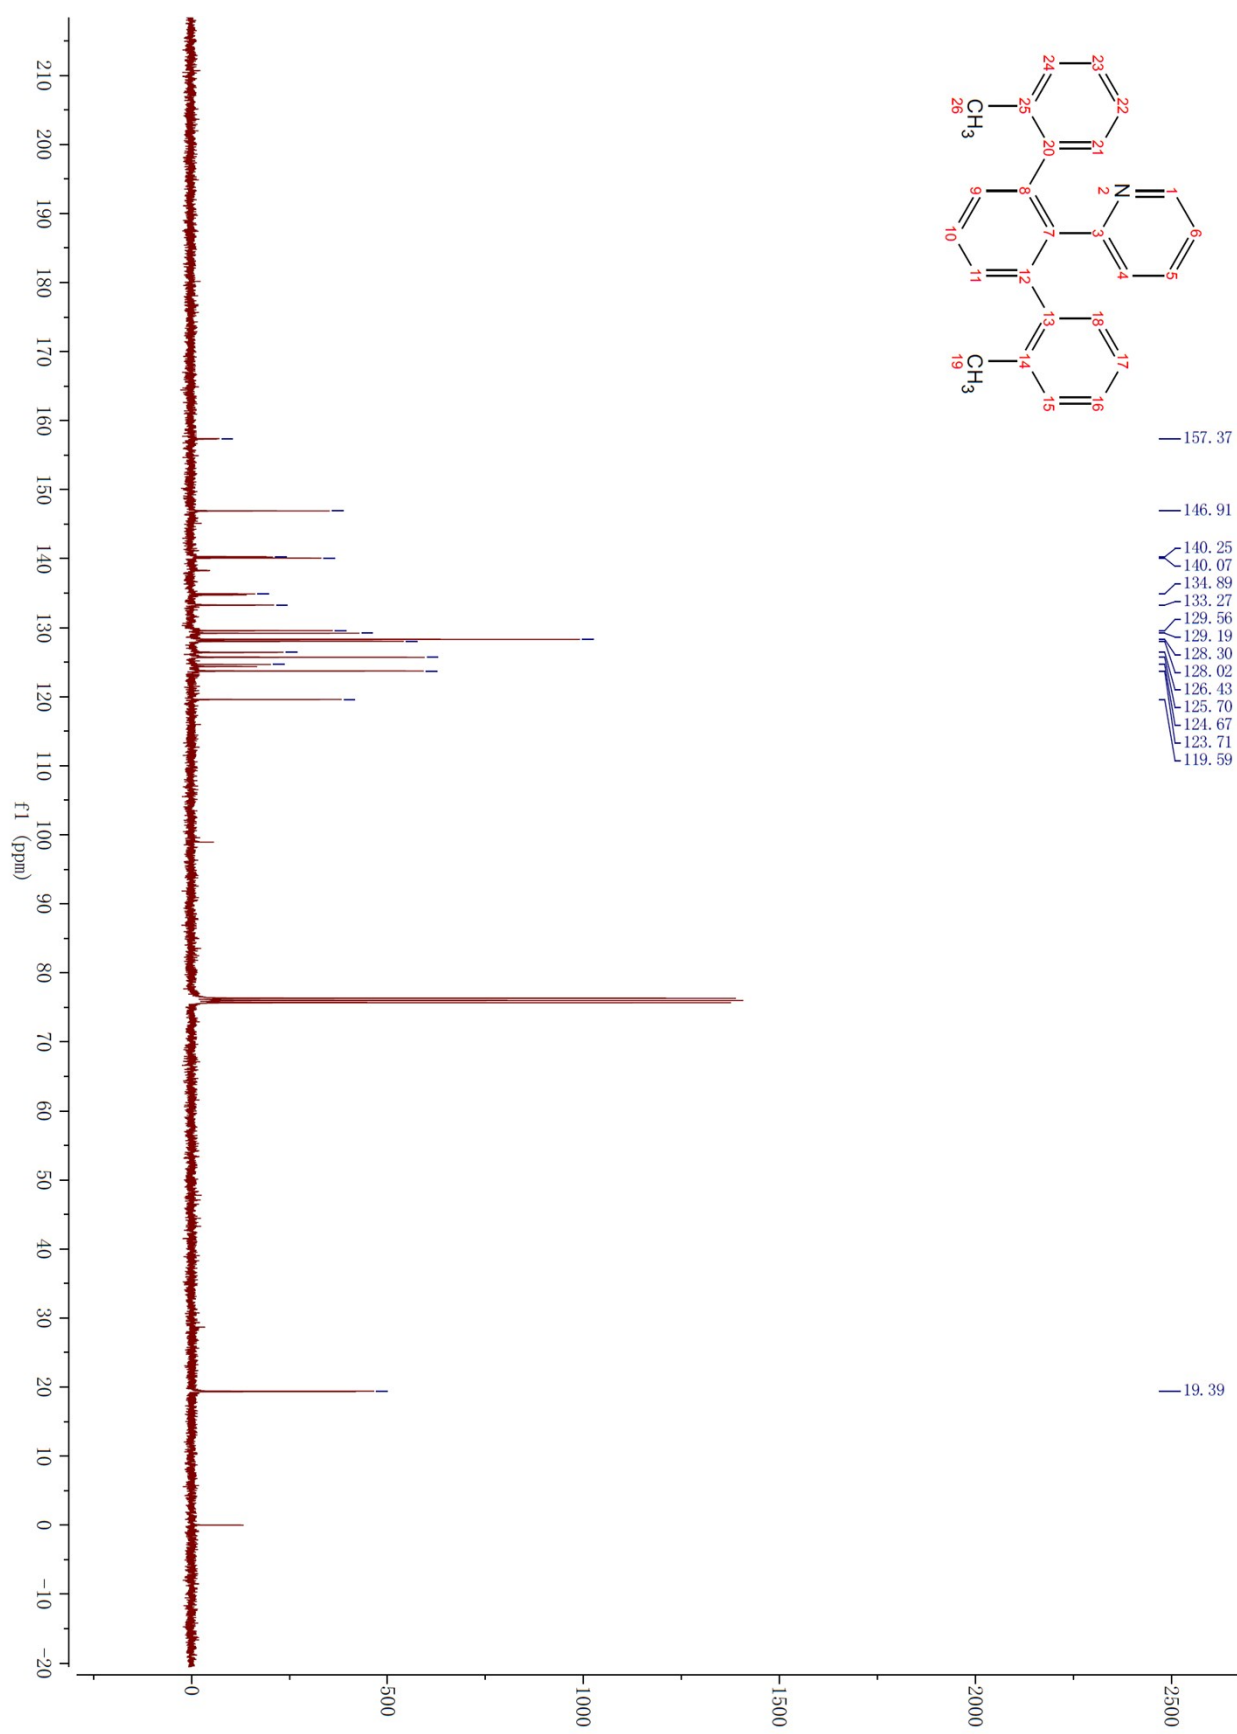

# <sup>1</sup>H NMR Spectrum of the Compound 3ap

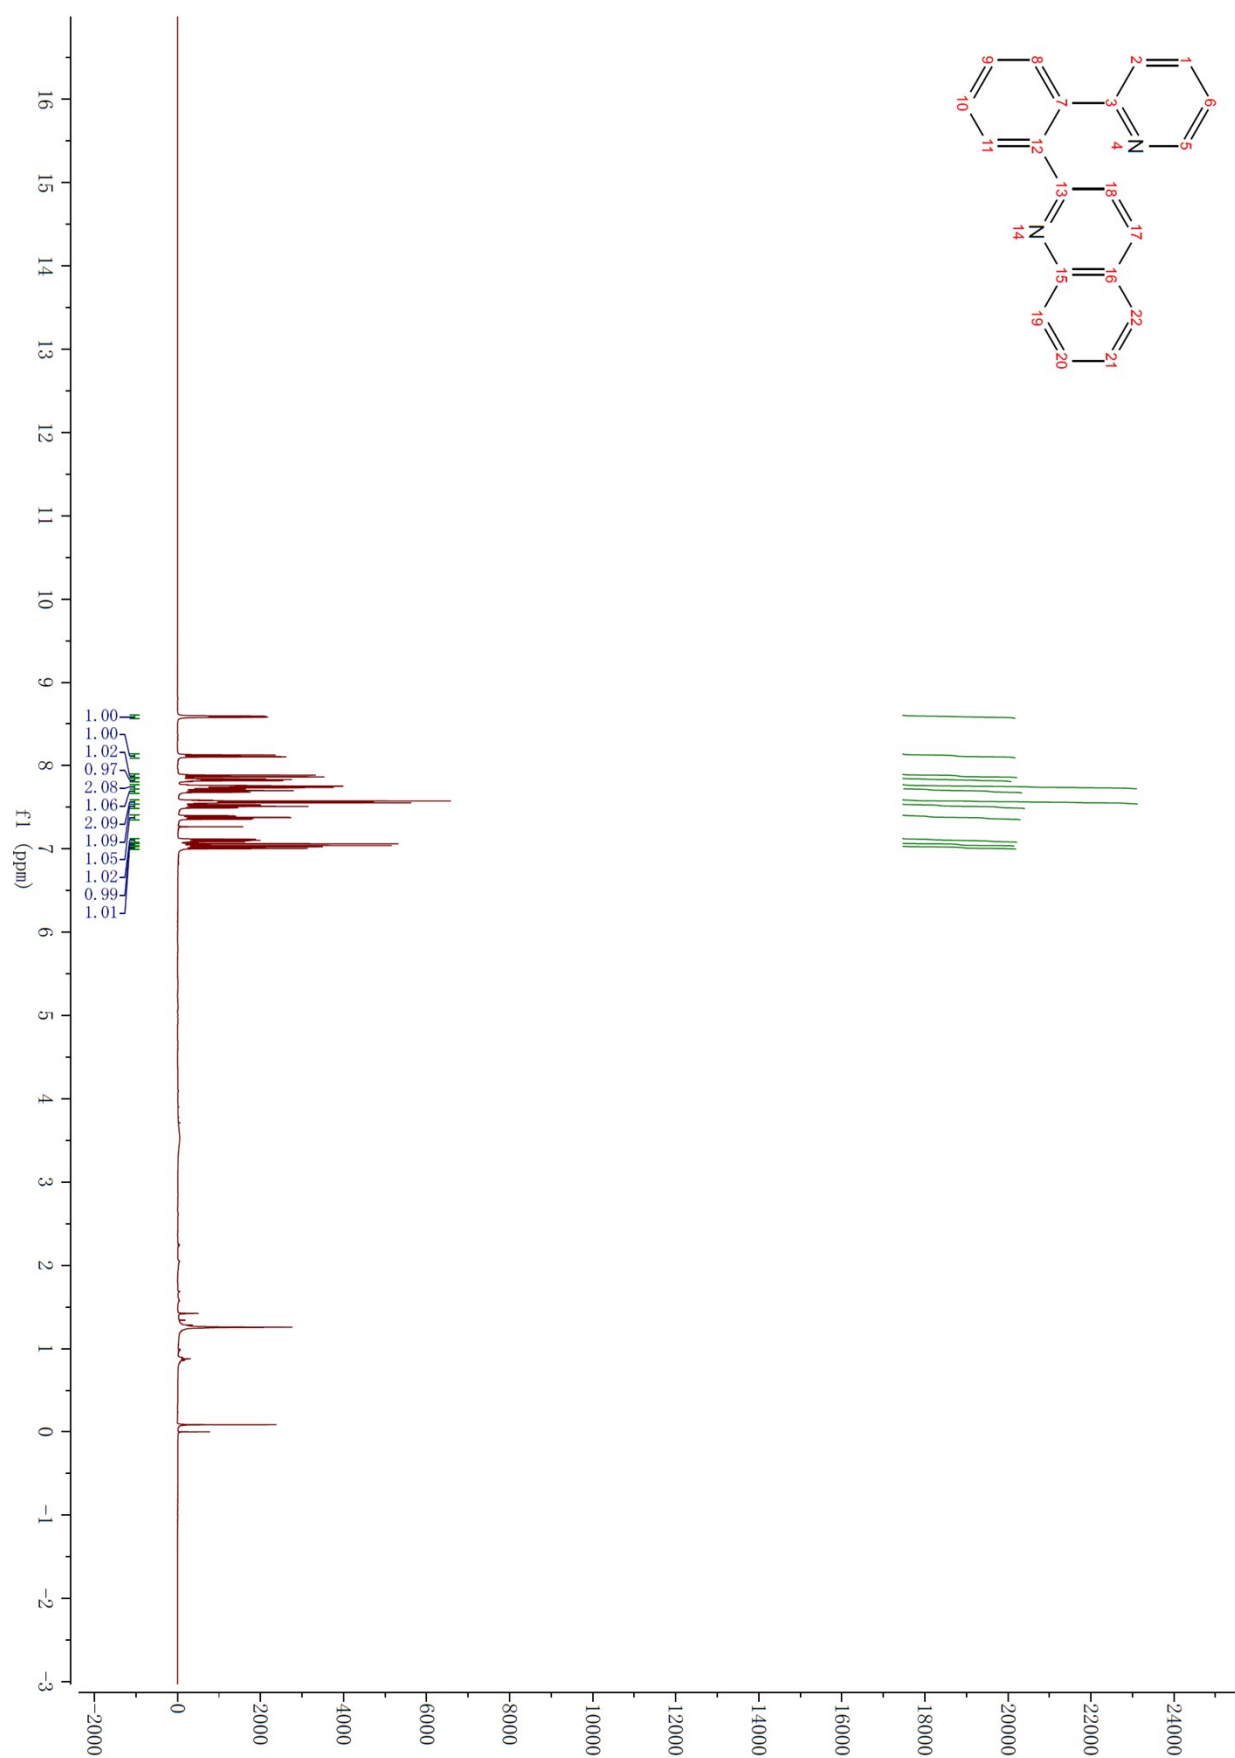

# <sup>13</sup>C NMR Spectrum of the Compound 3ap

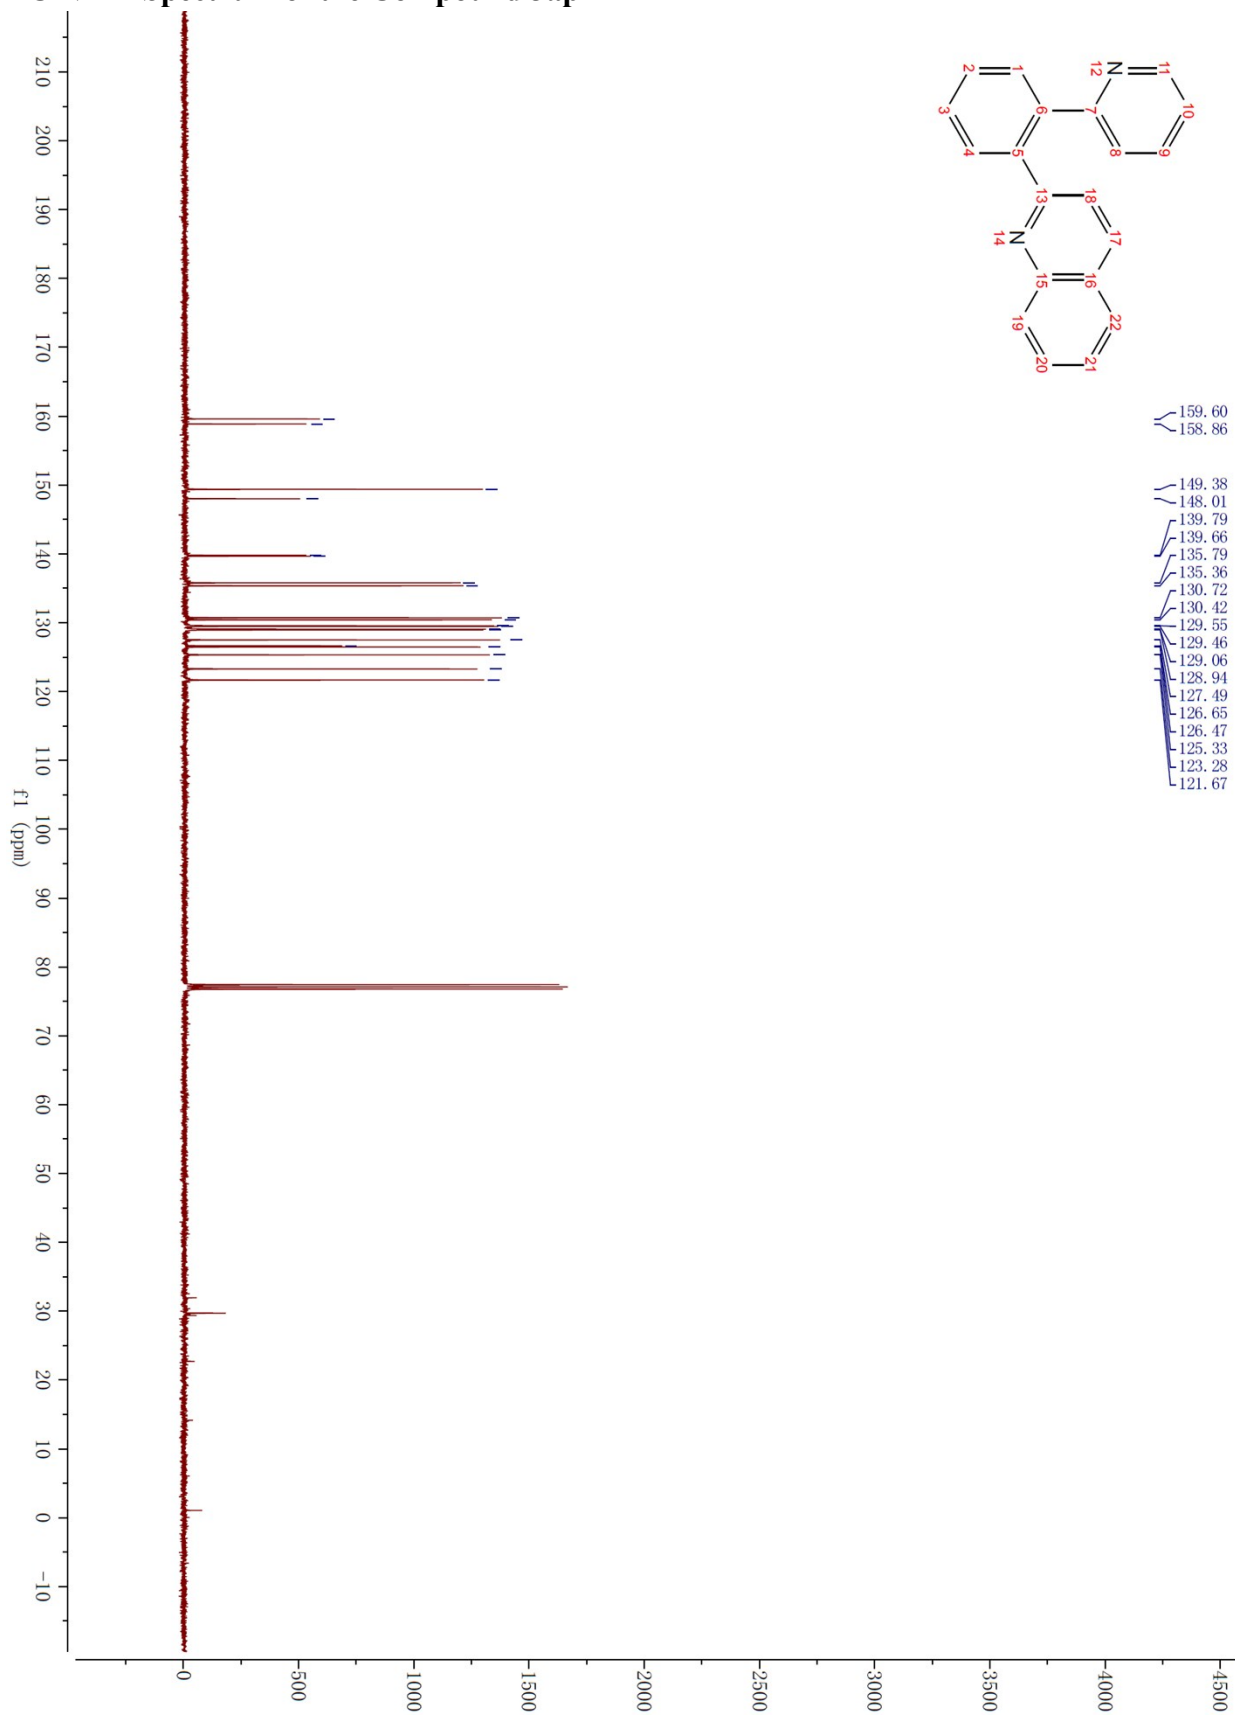

# <sup>1</sup>H NMR Spectrum of the Compound 4ap

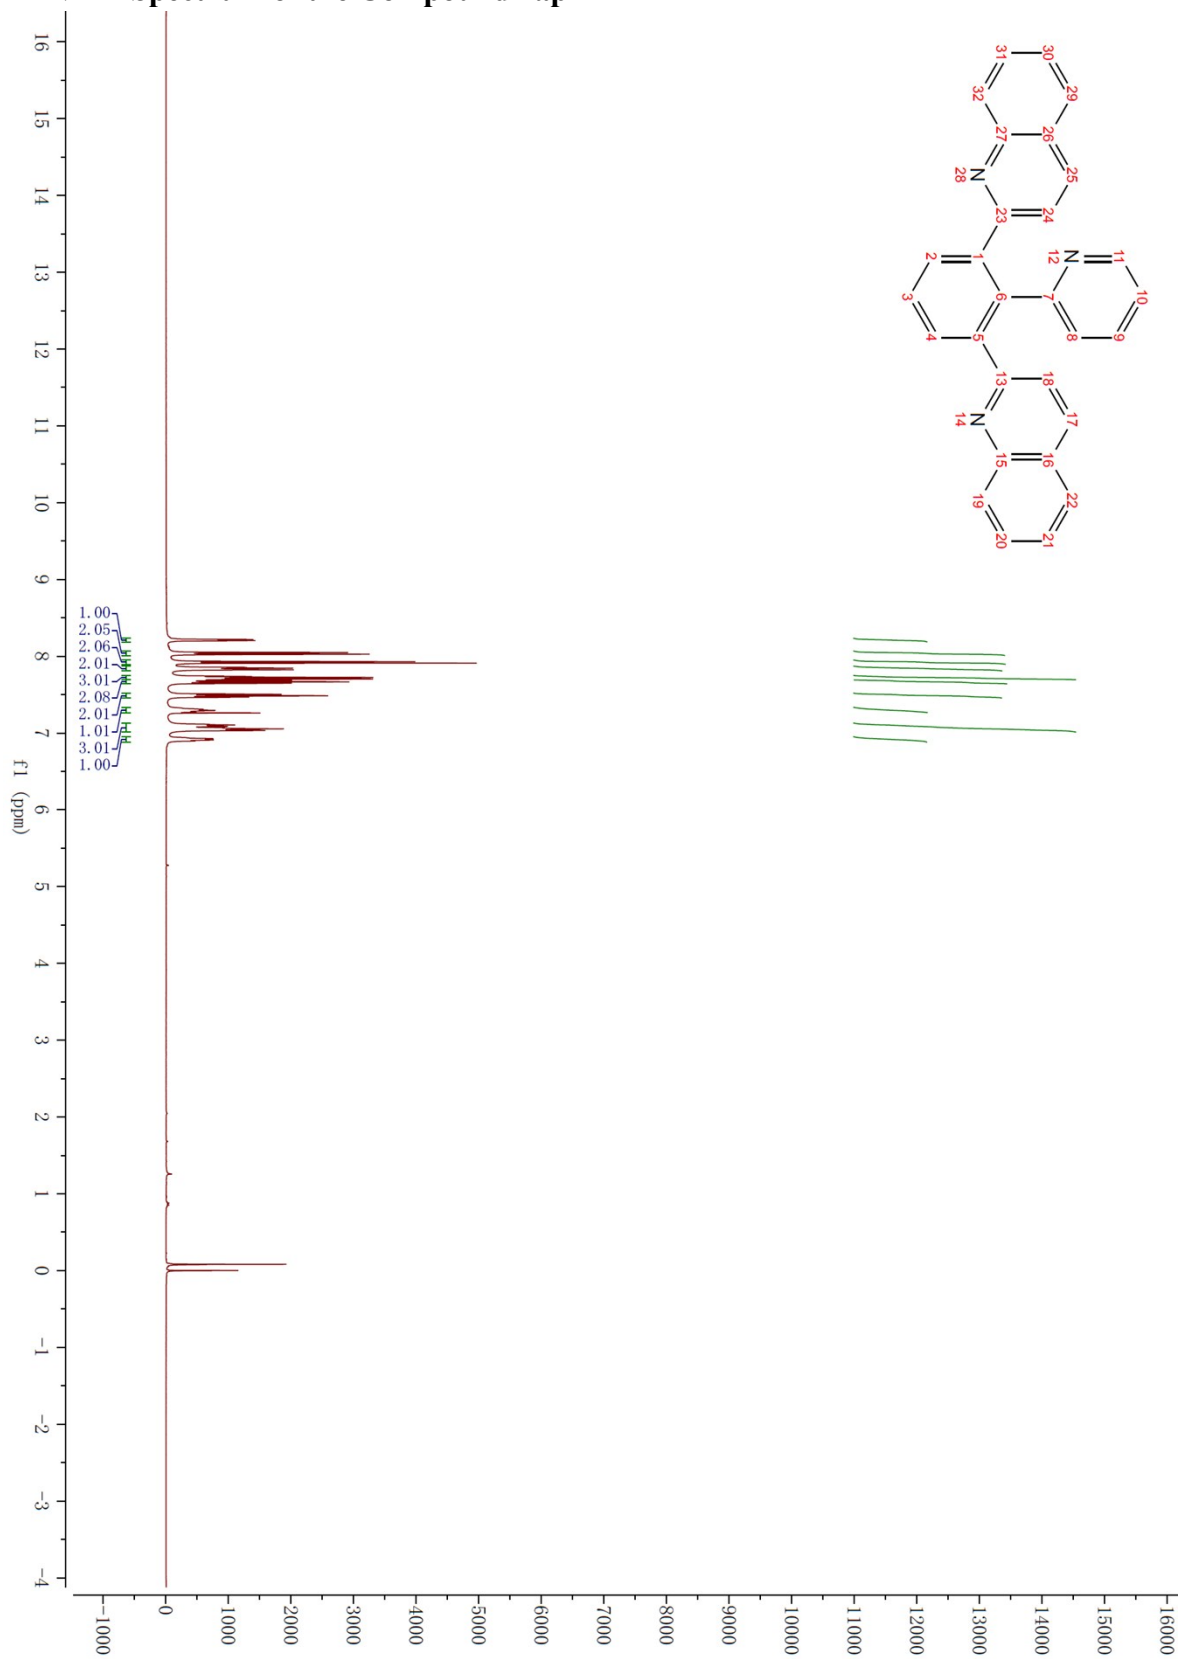

# <sup>13</sup>C NMR Spectrum of the Compound 4ap

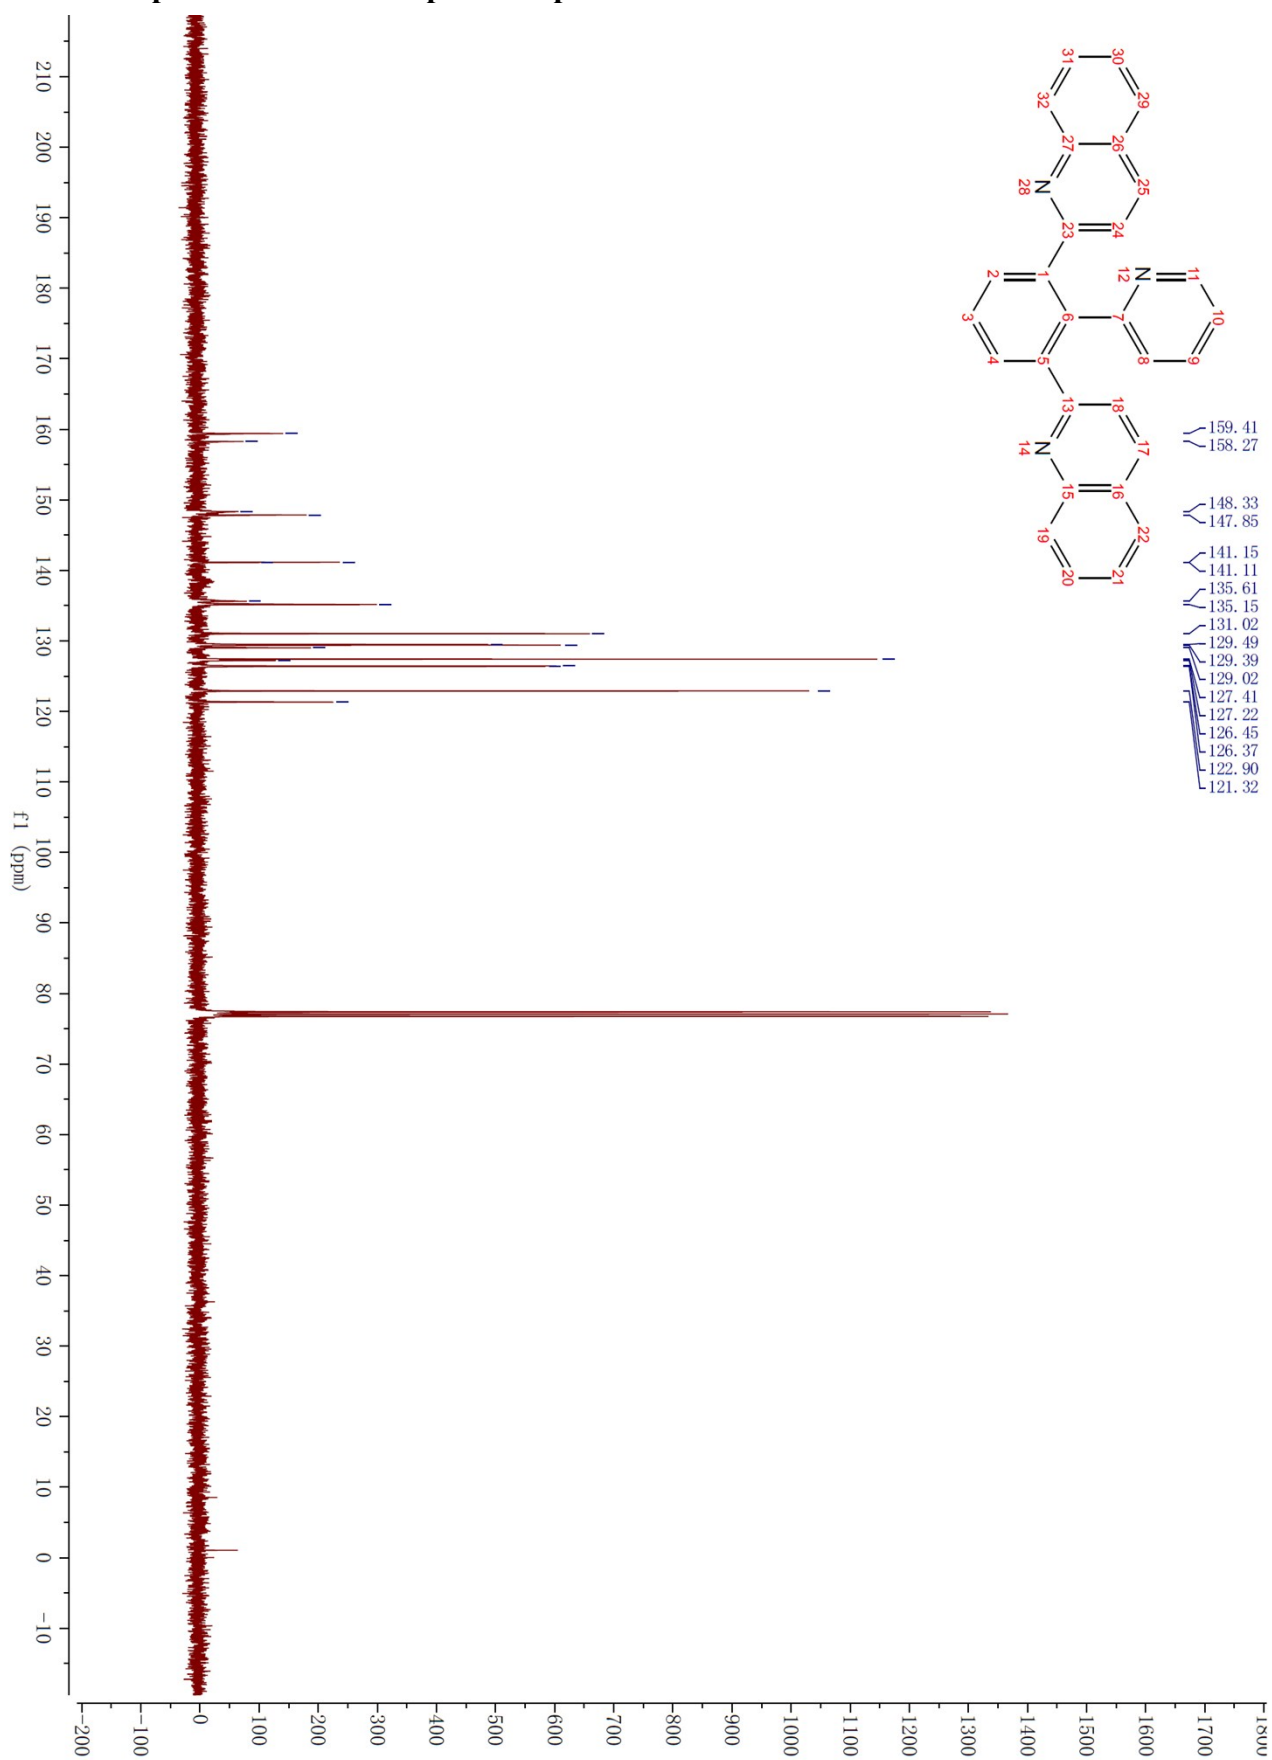

# <sup>1</sup>H NMR Spectrum of the Compound 3aq

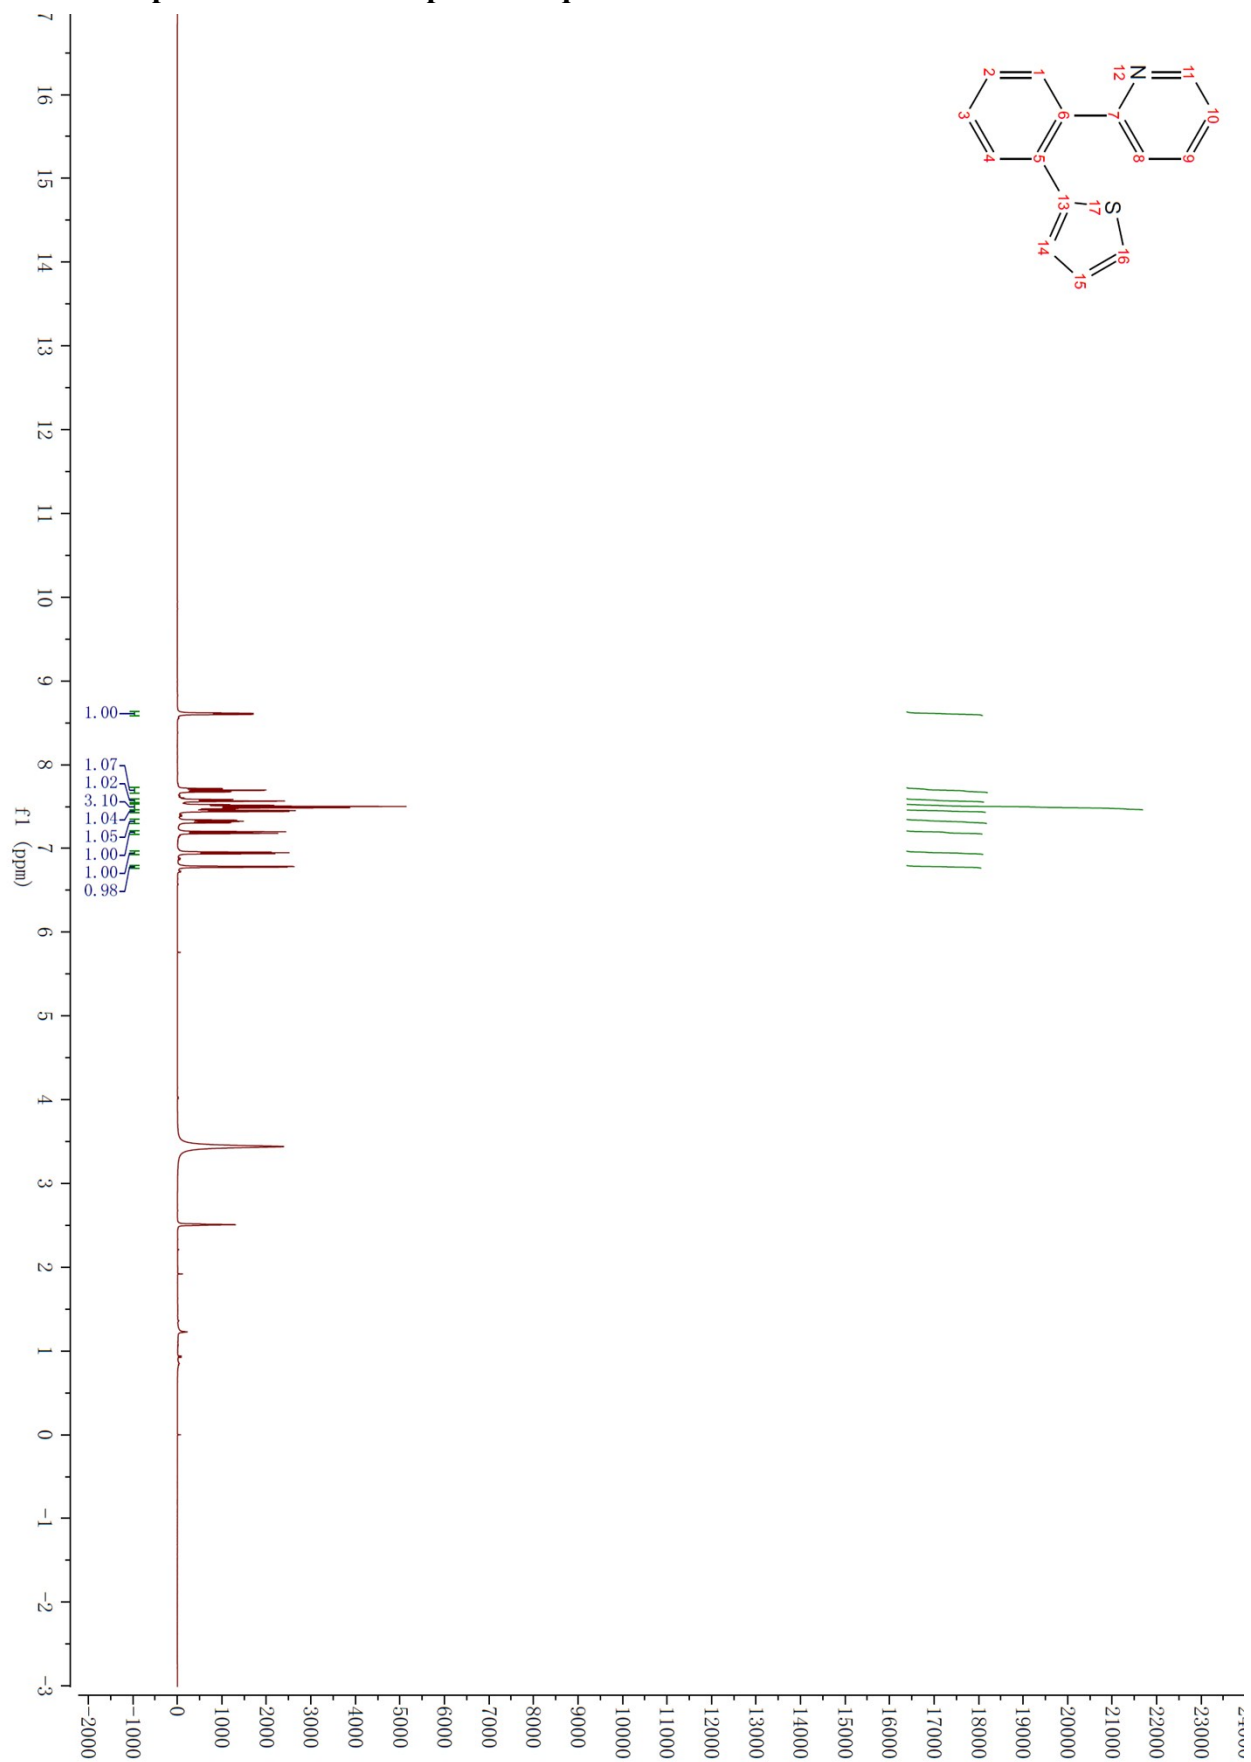



# <sup>13</sup>C NMR Spectrum of the Compound 3aq

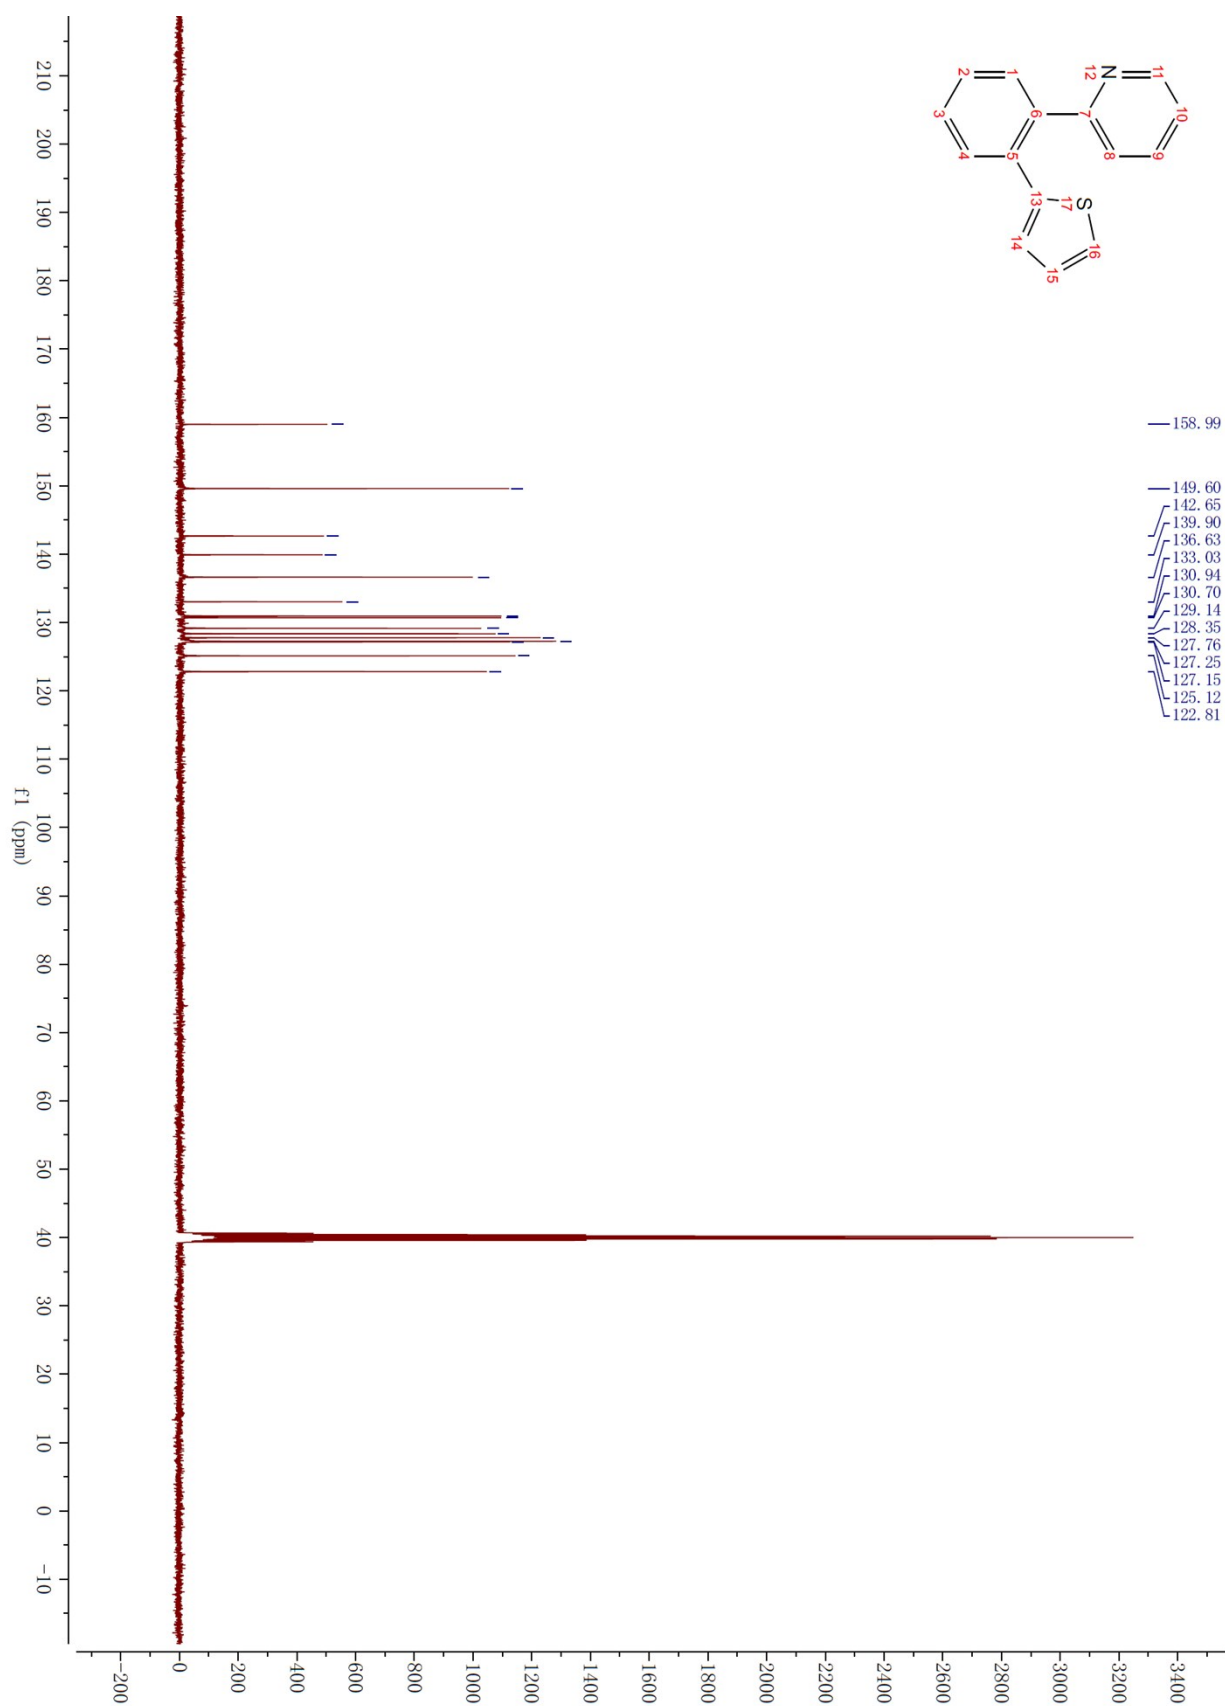

# <sup>1</sup>H NMR Spectrum of the Compound 4aq

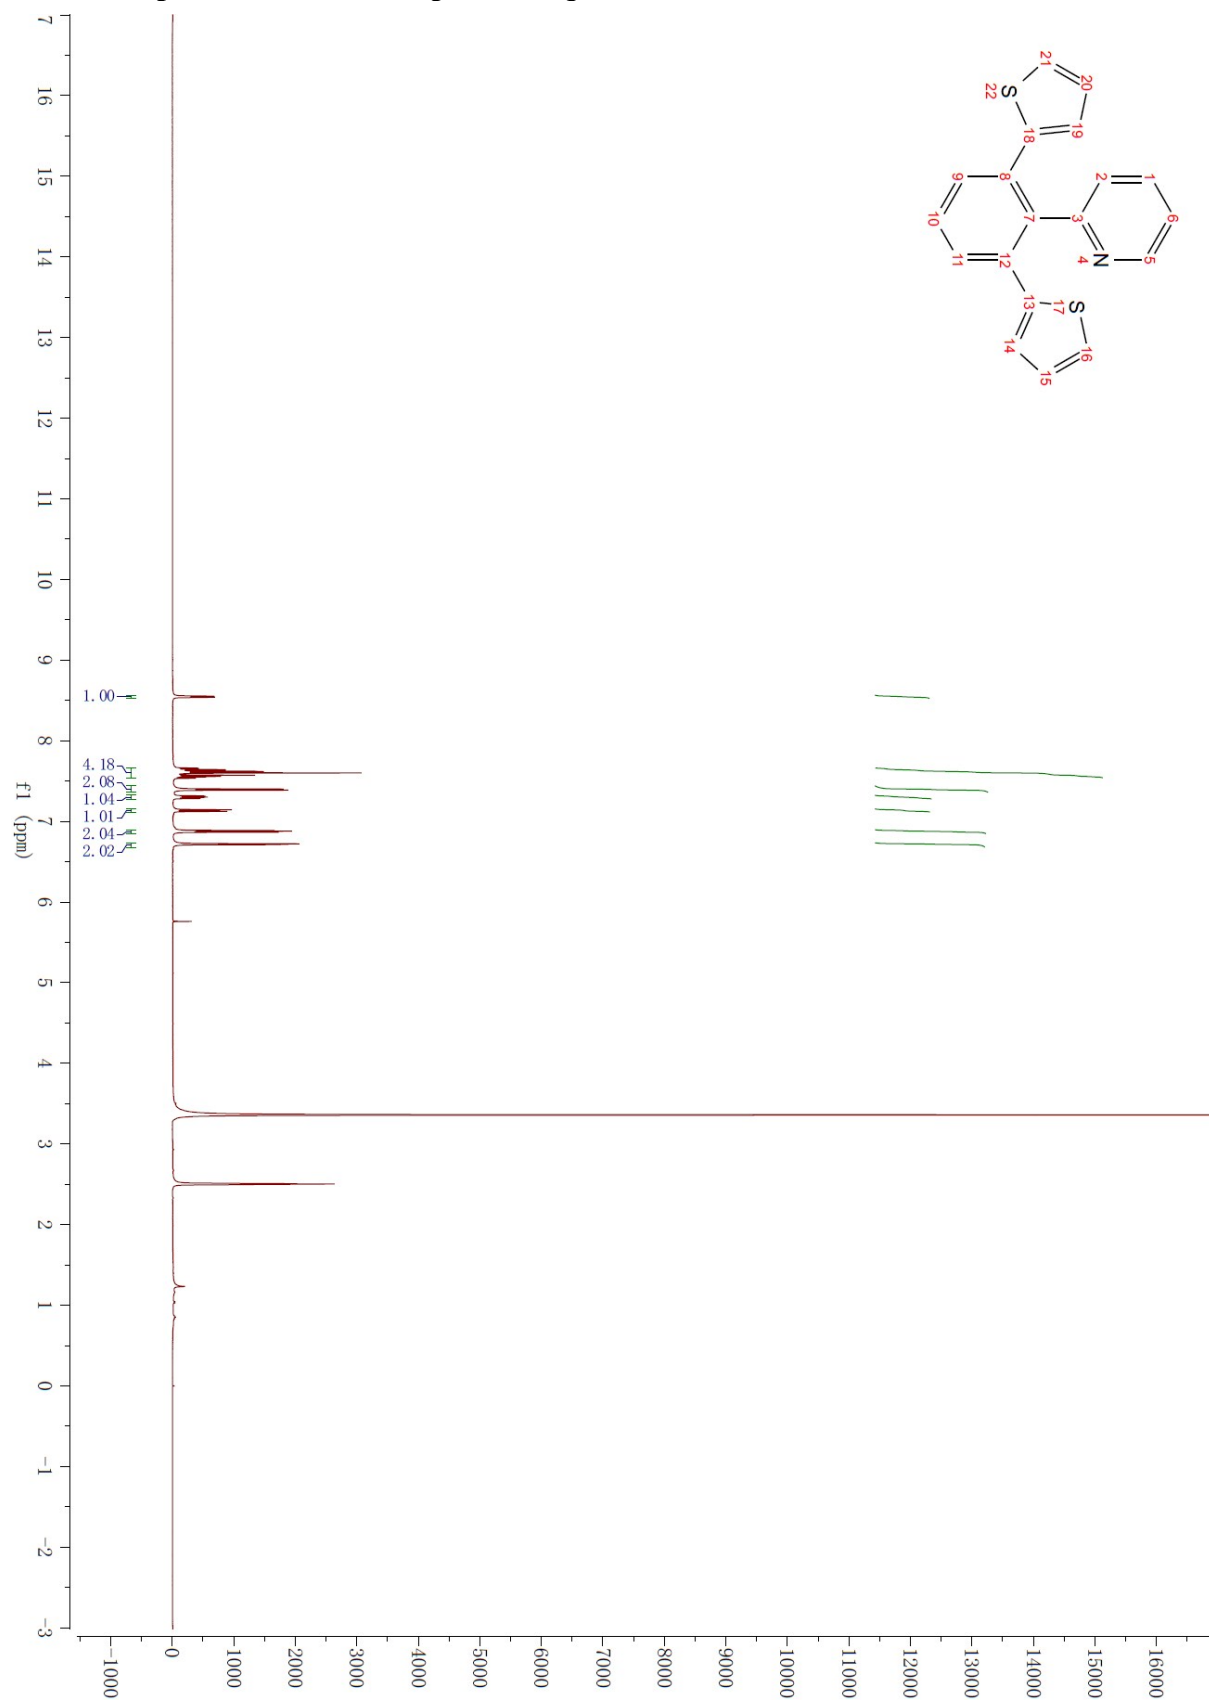

# <sup>13</sup>C NMR Spectrum of the Compound 4aq

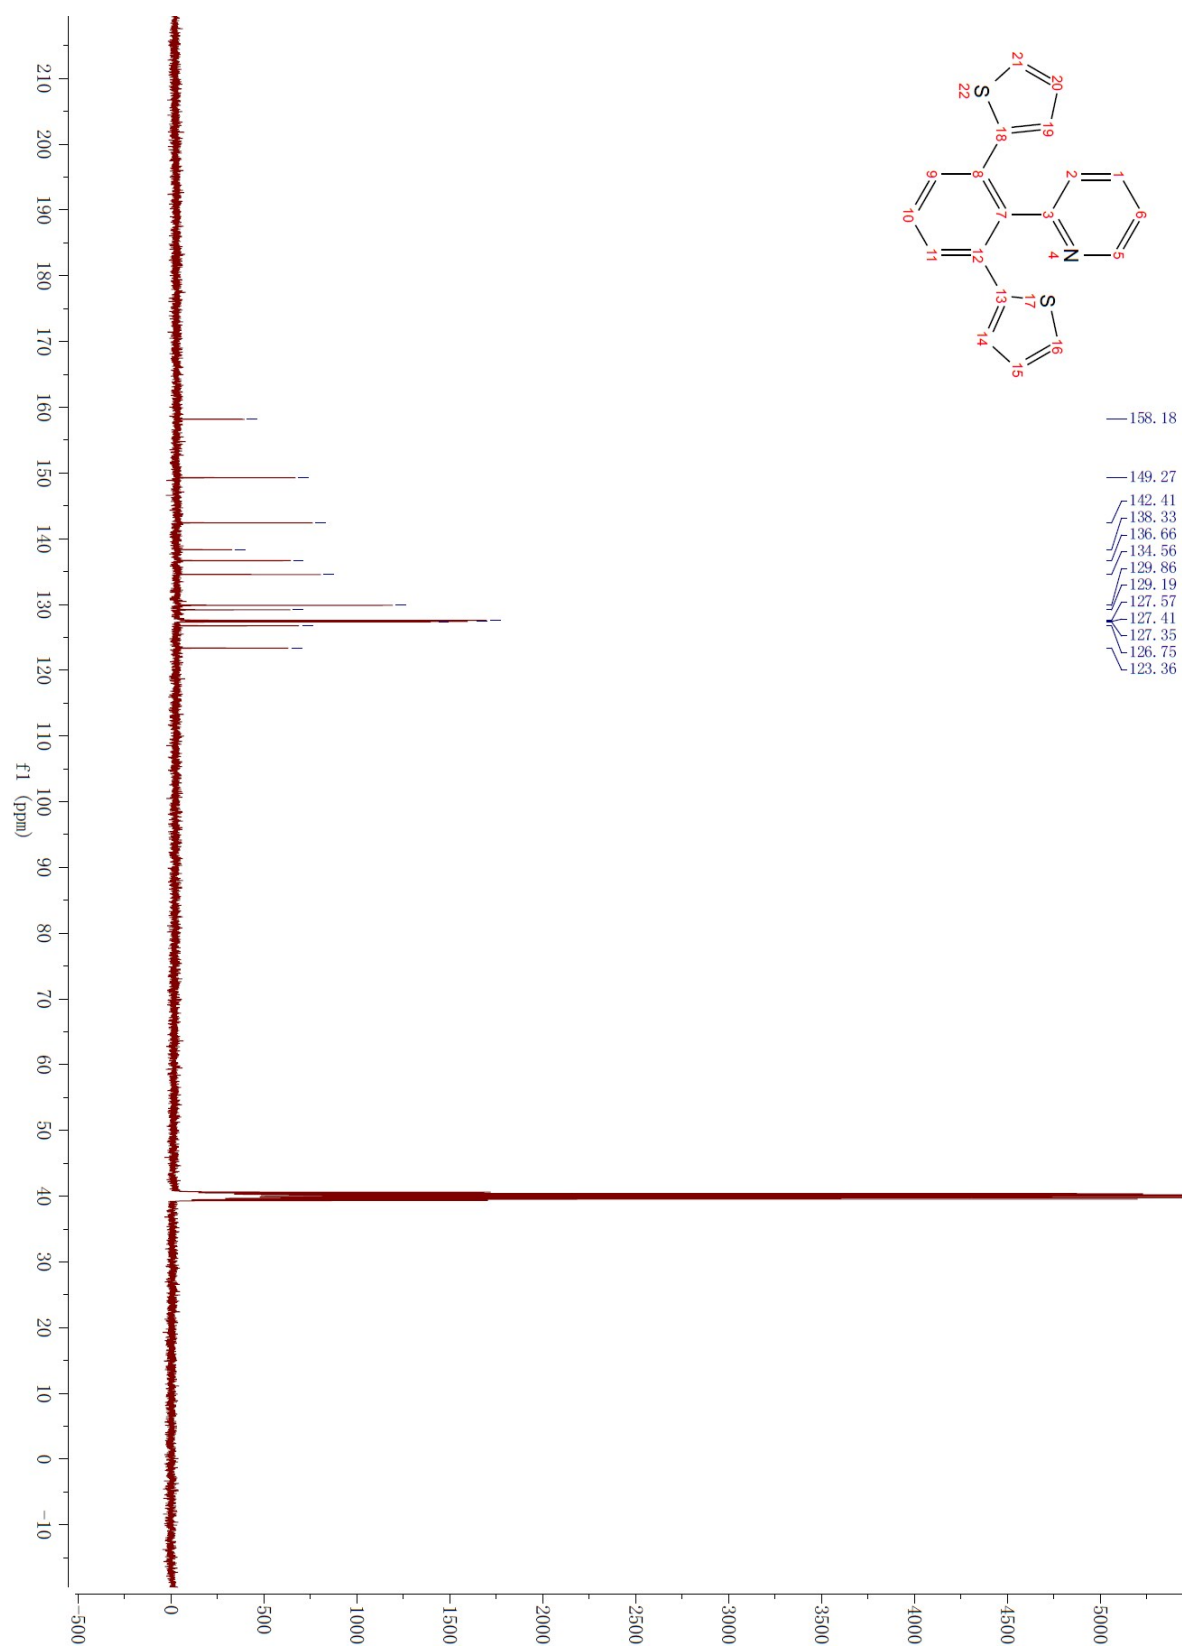

# <sup>1</sup>H NMR Spectrum of the Compound 3ak

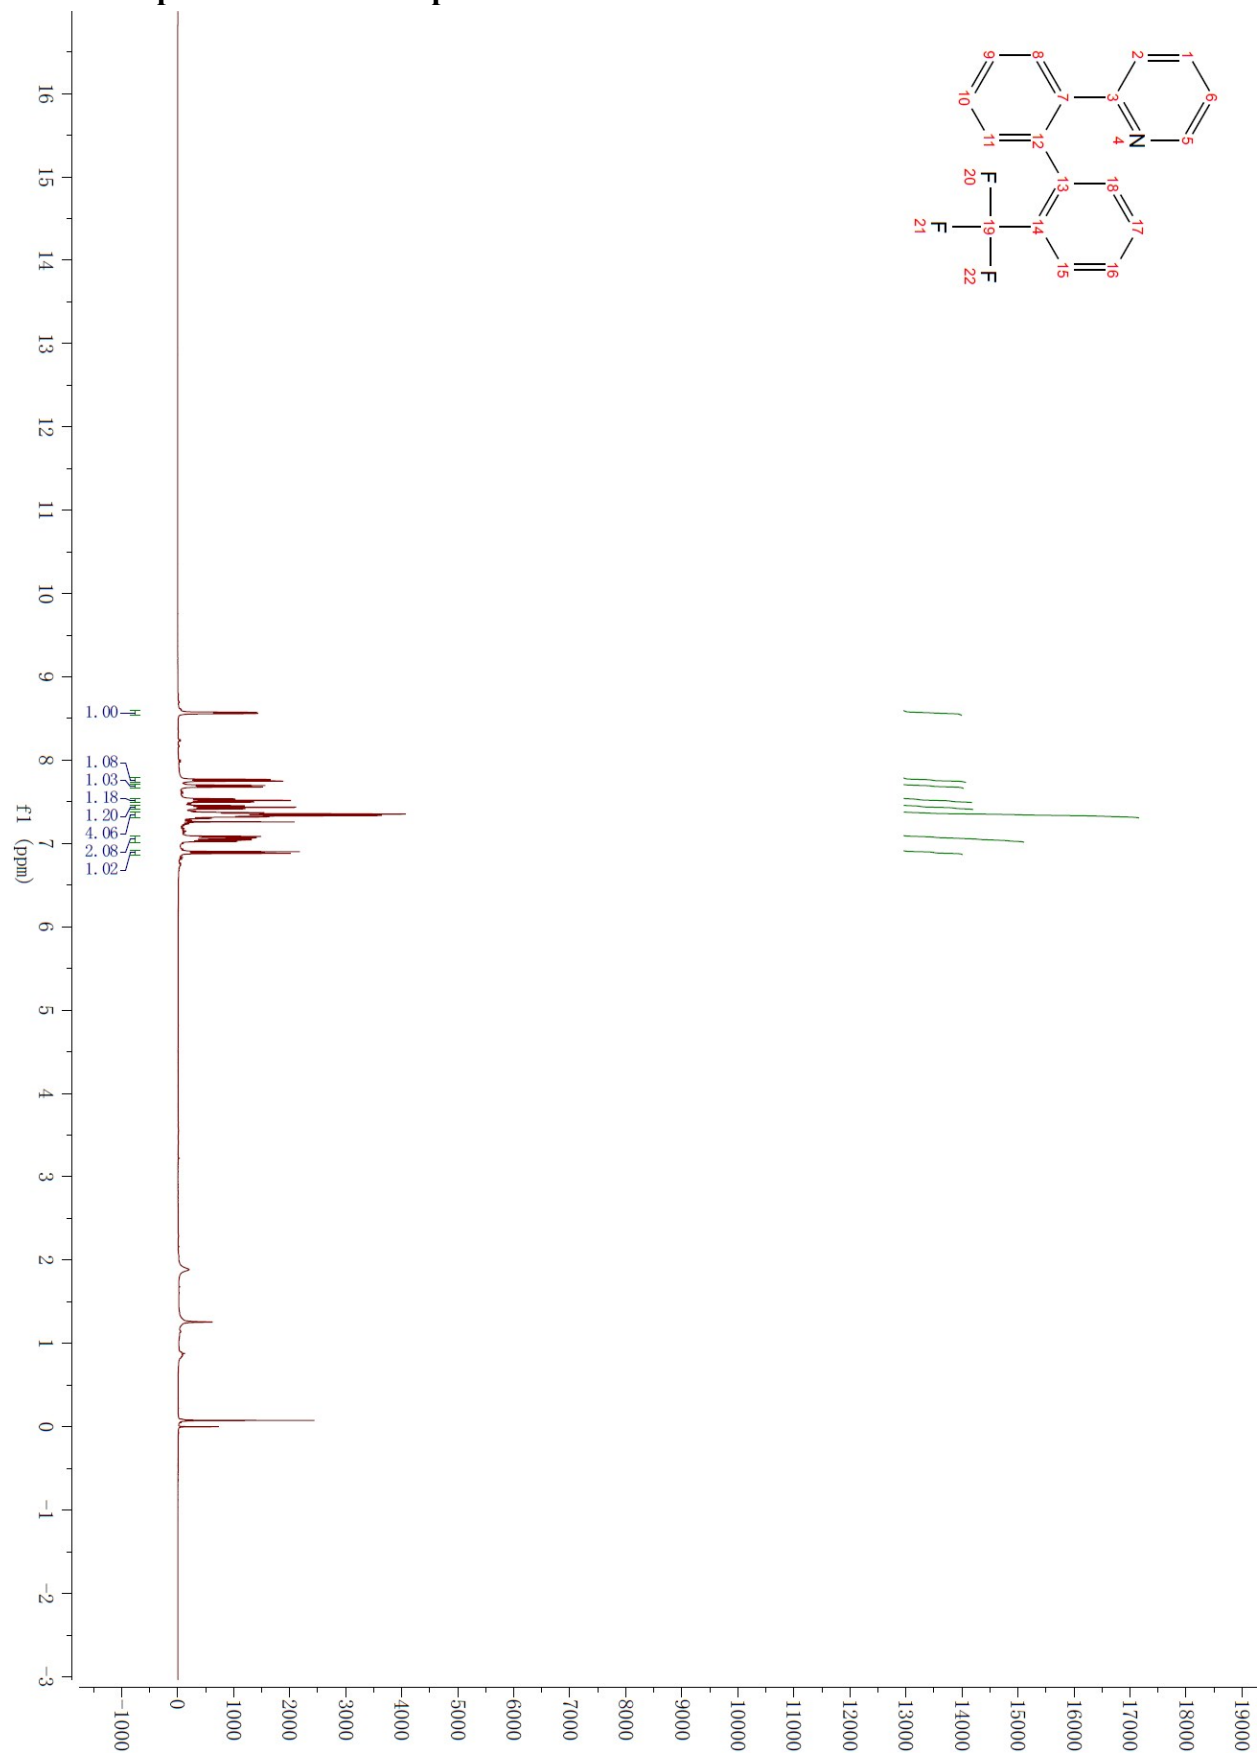

# <sup>13</sup>C NMR Spectrum of the Compound 3ak

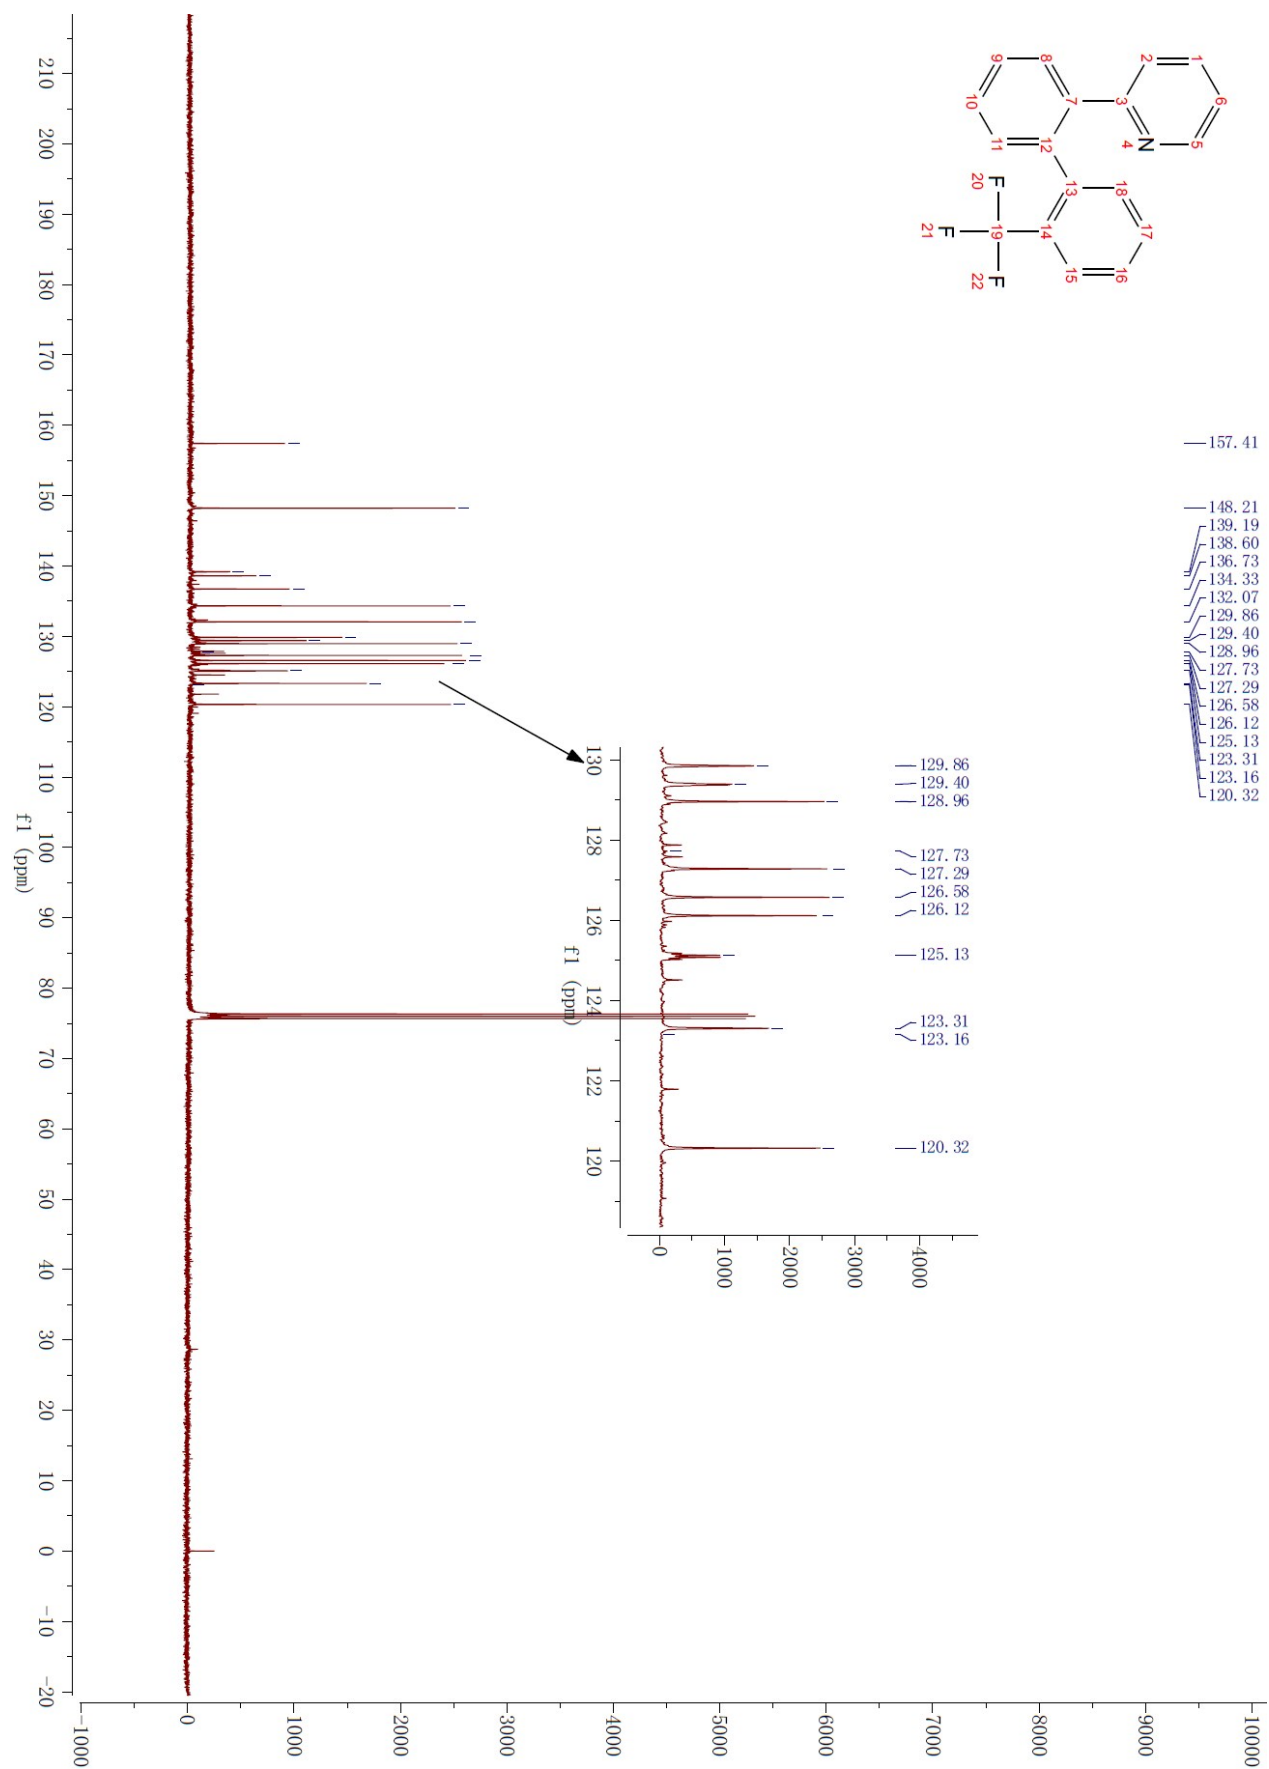

# <sup>1</sup>H NMR Spectrum of the Compound 3an

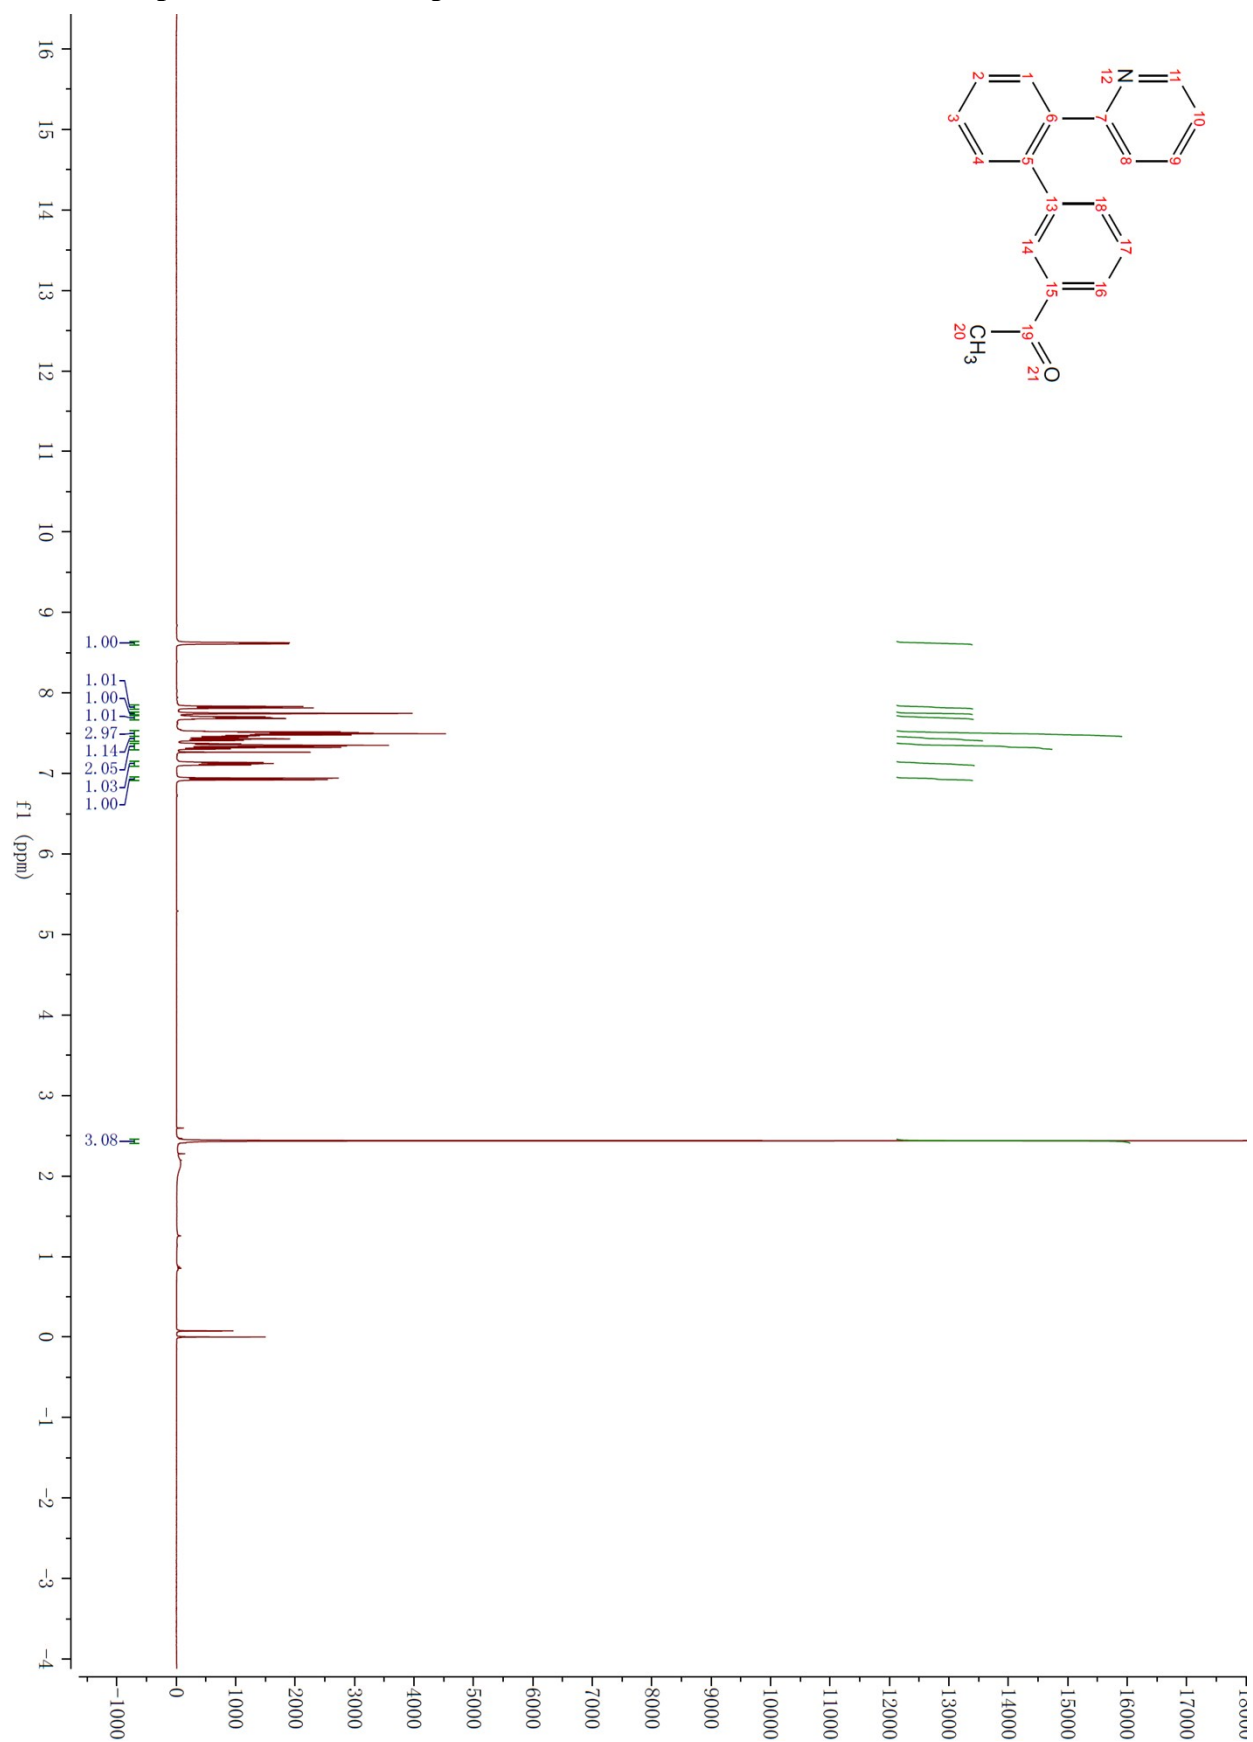

# <sup>13</sup>C NMR Spectrum of the Compound 3an

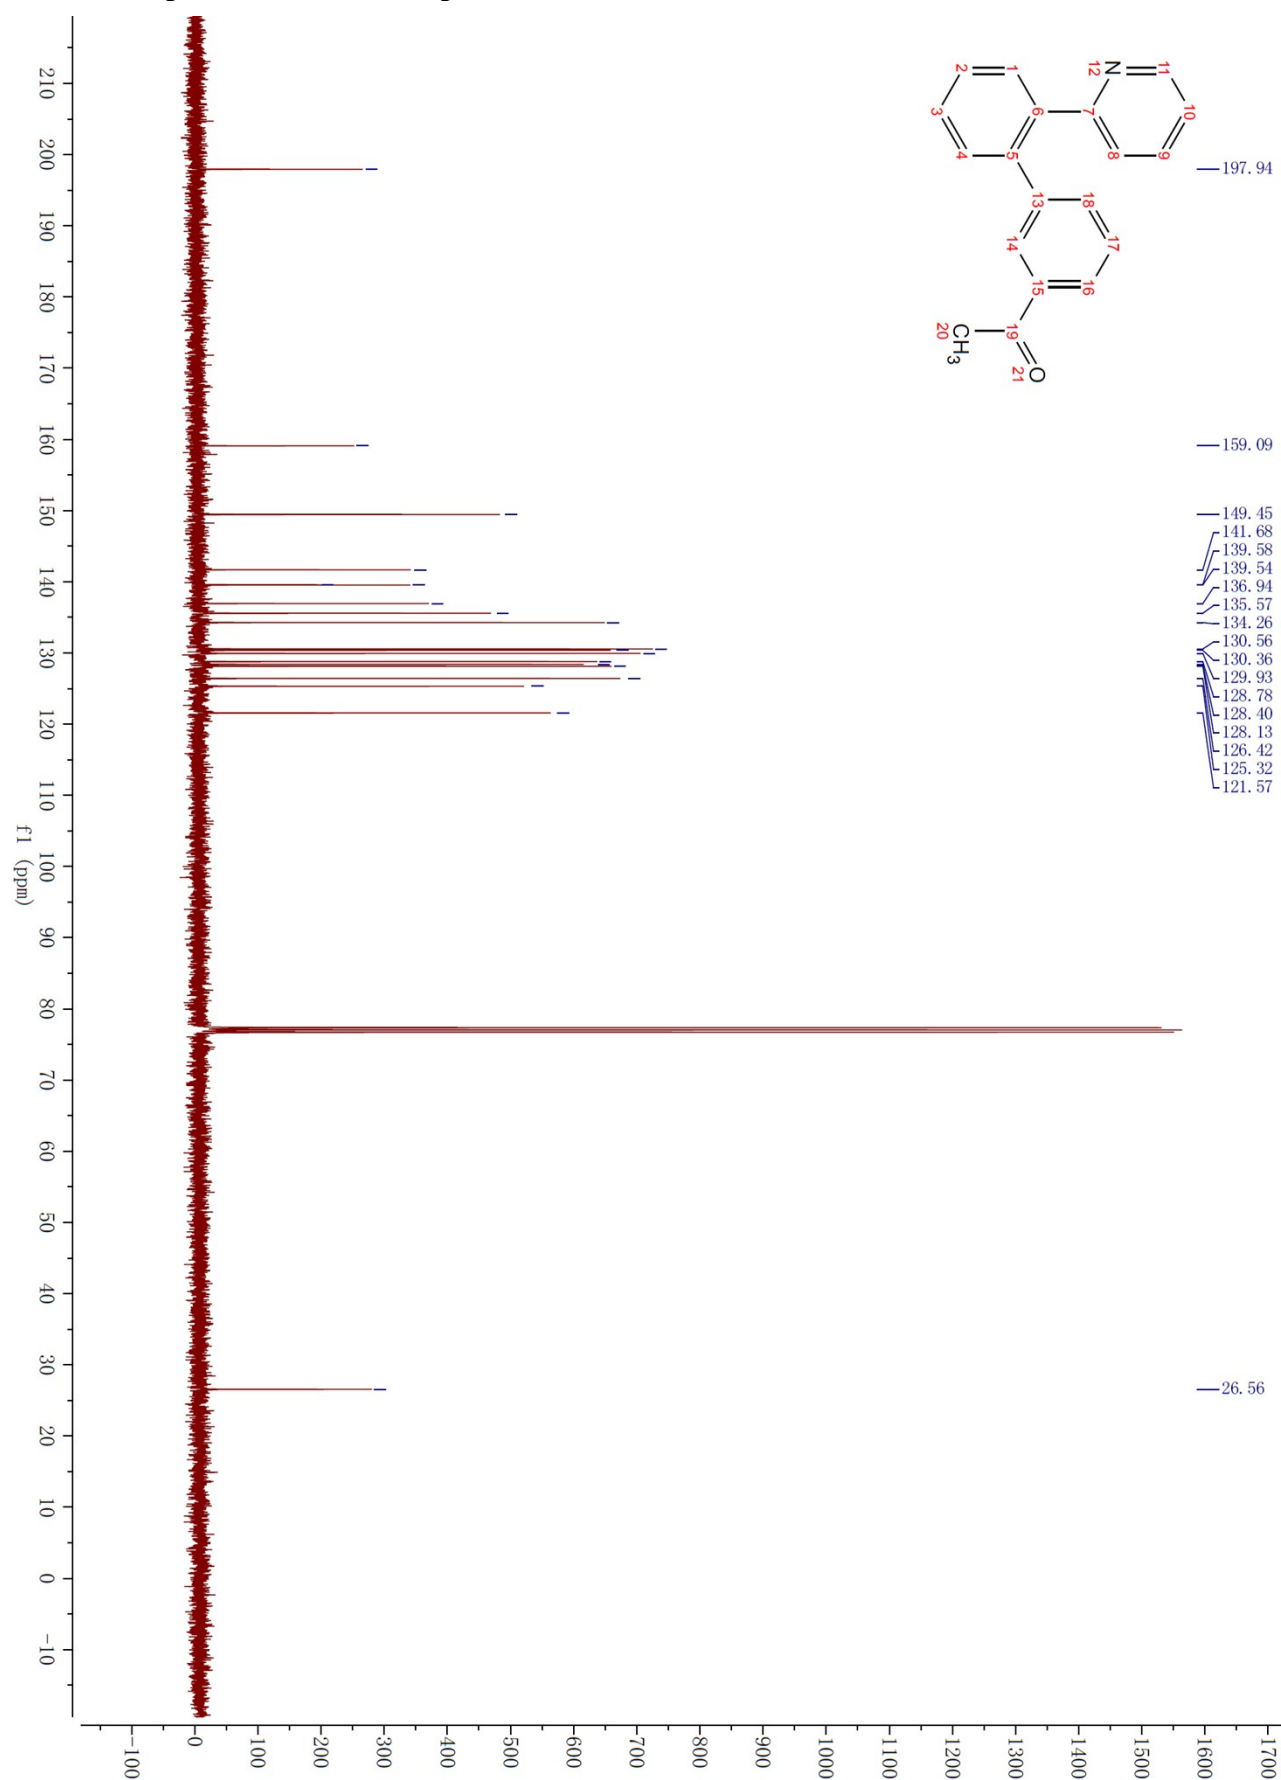

# <sup>1</sup>H NMR Spectrum of the Compound 4an

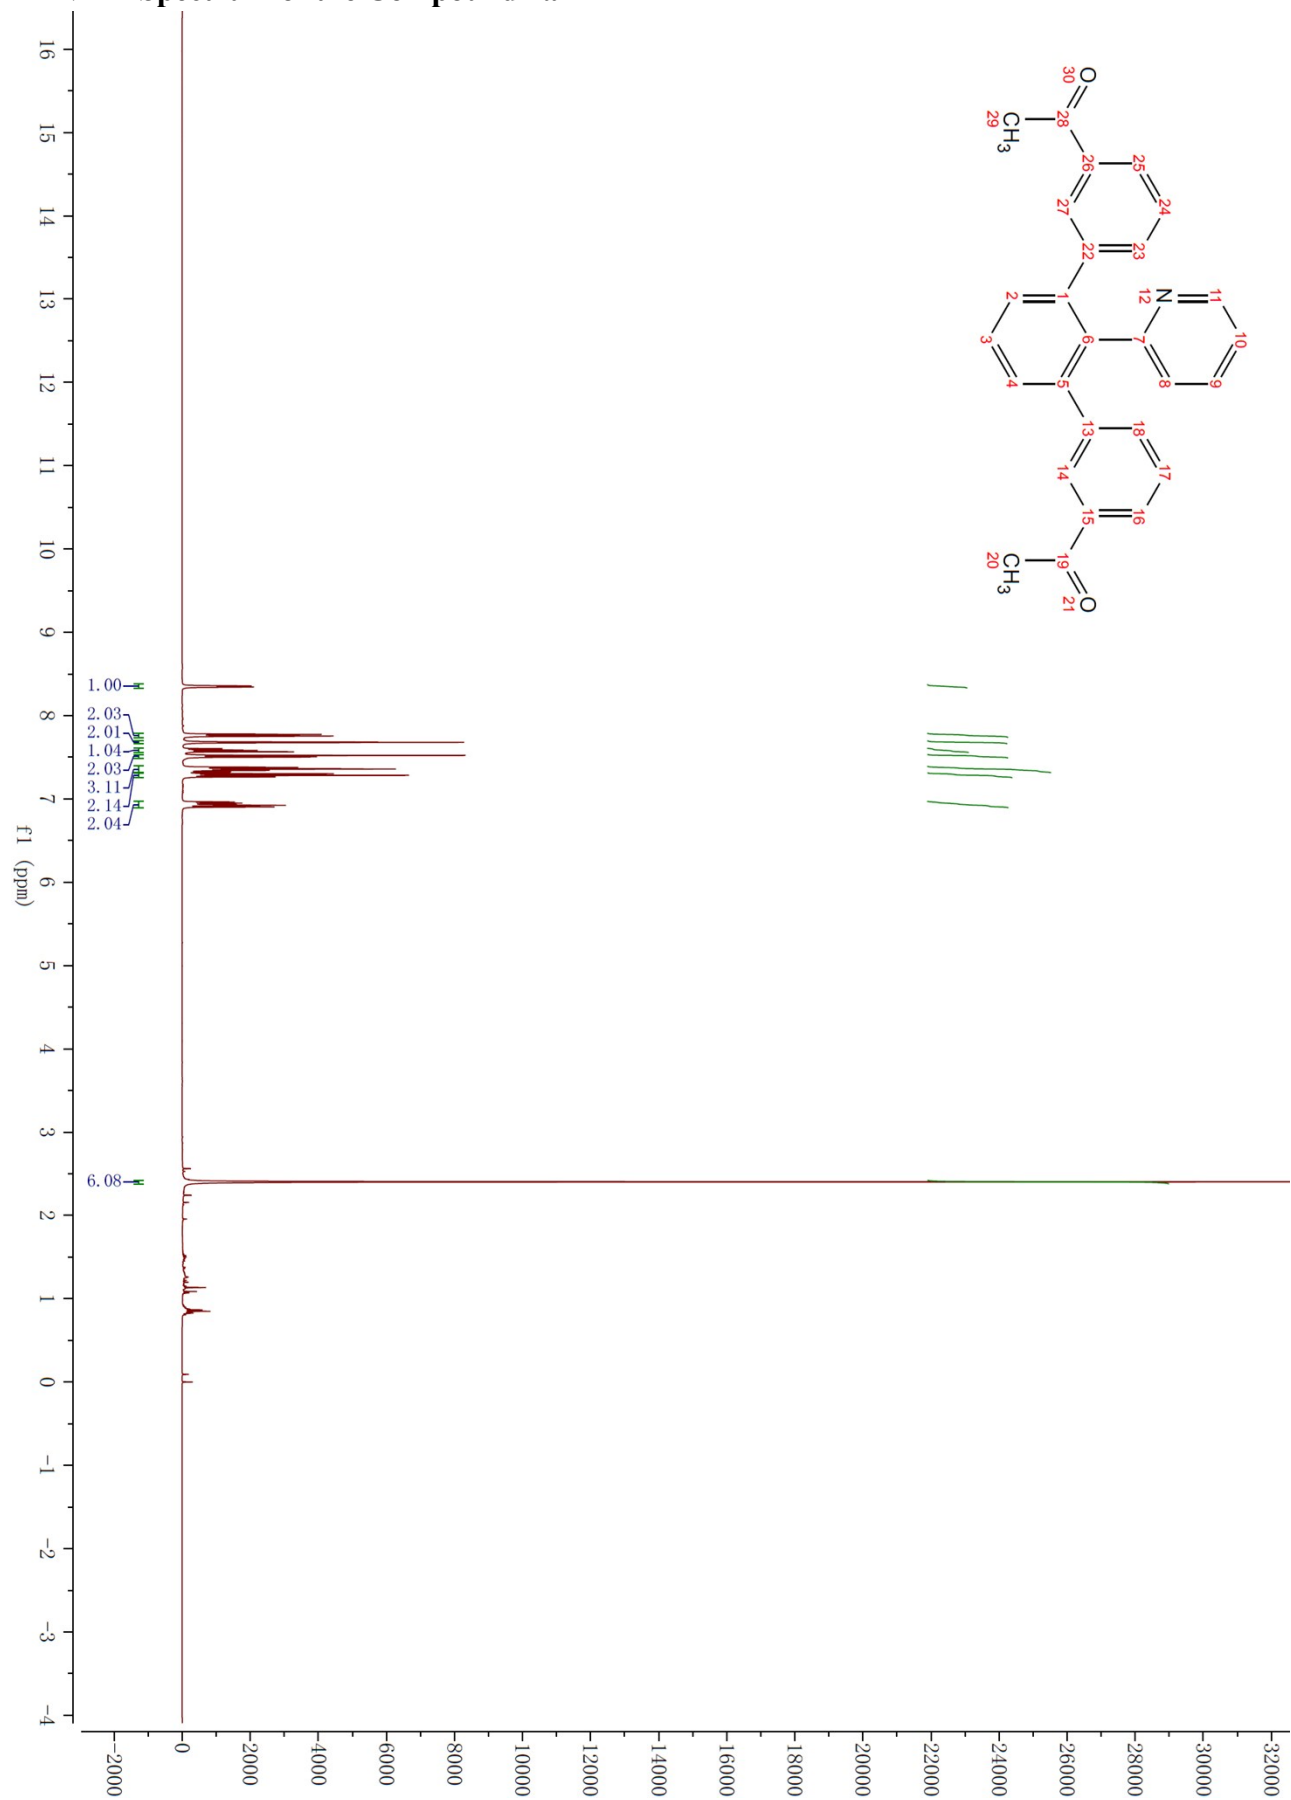



# <sup>13</sup>C NMR Spectrum of the Compound 4an

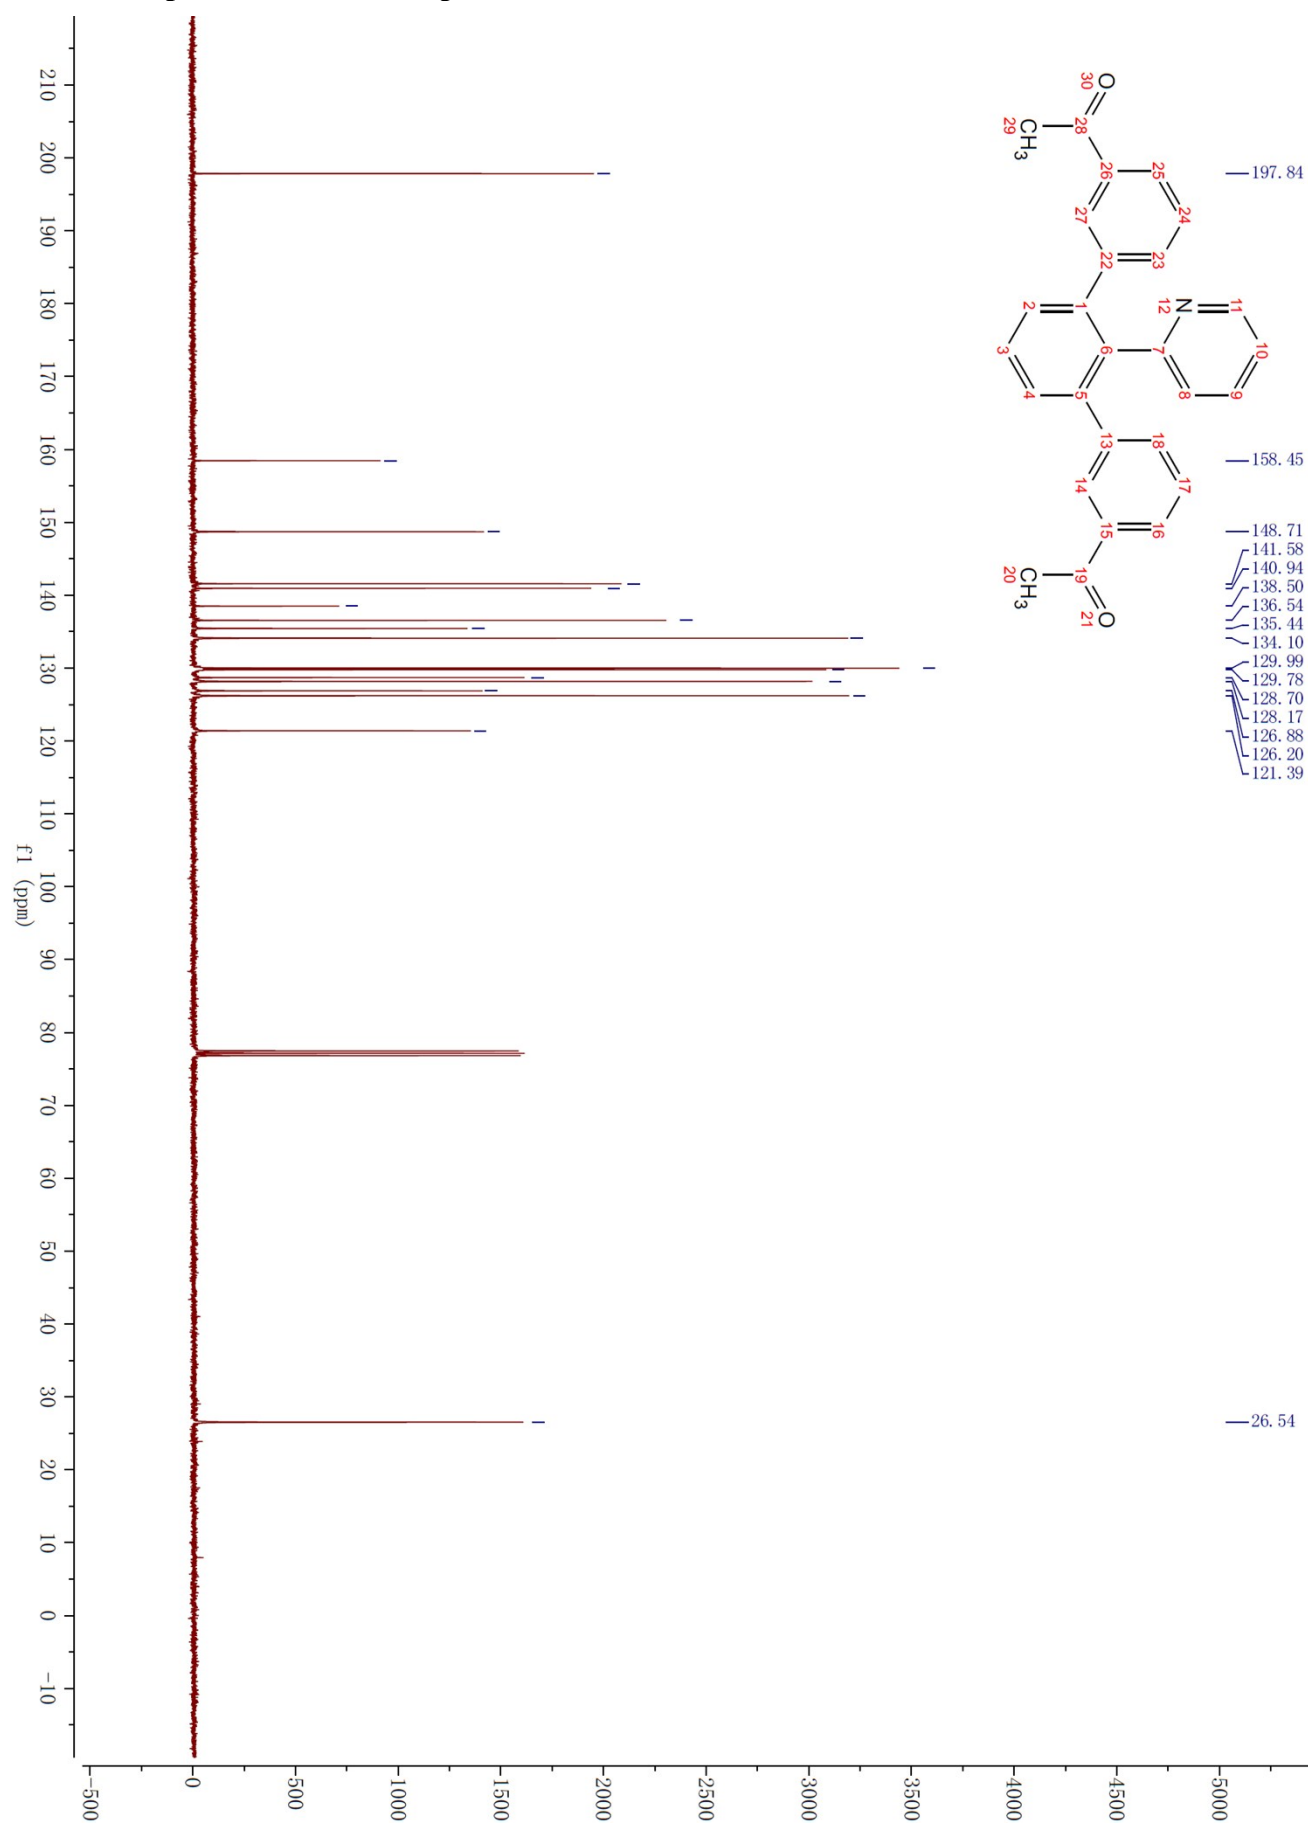

# <sup>1</sup>H NMR Spectrum of the Compound 3ag

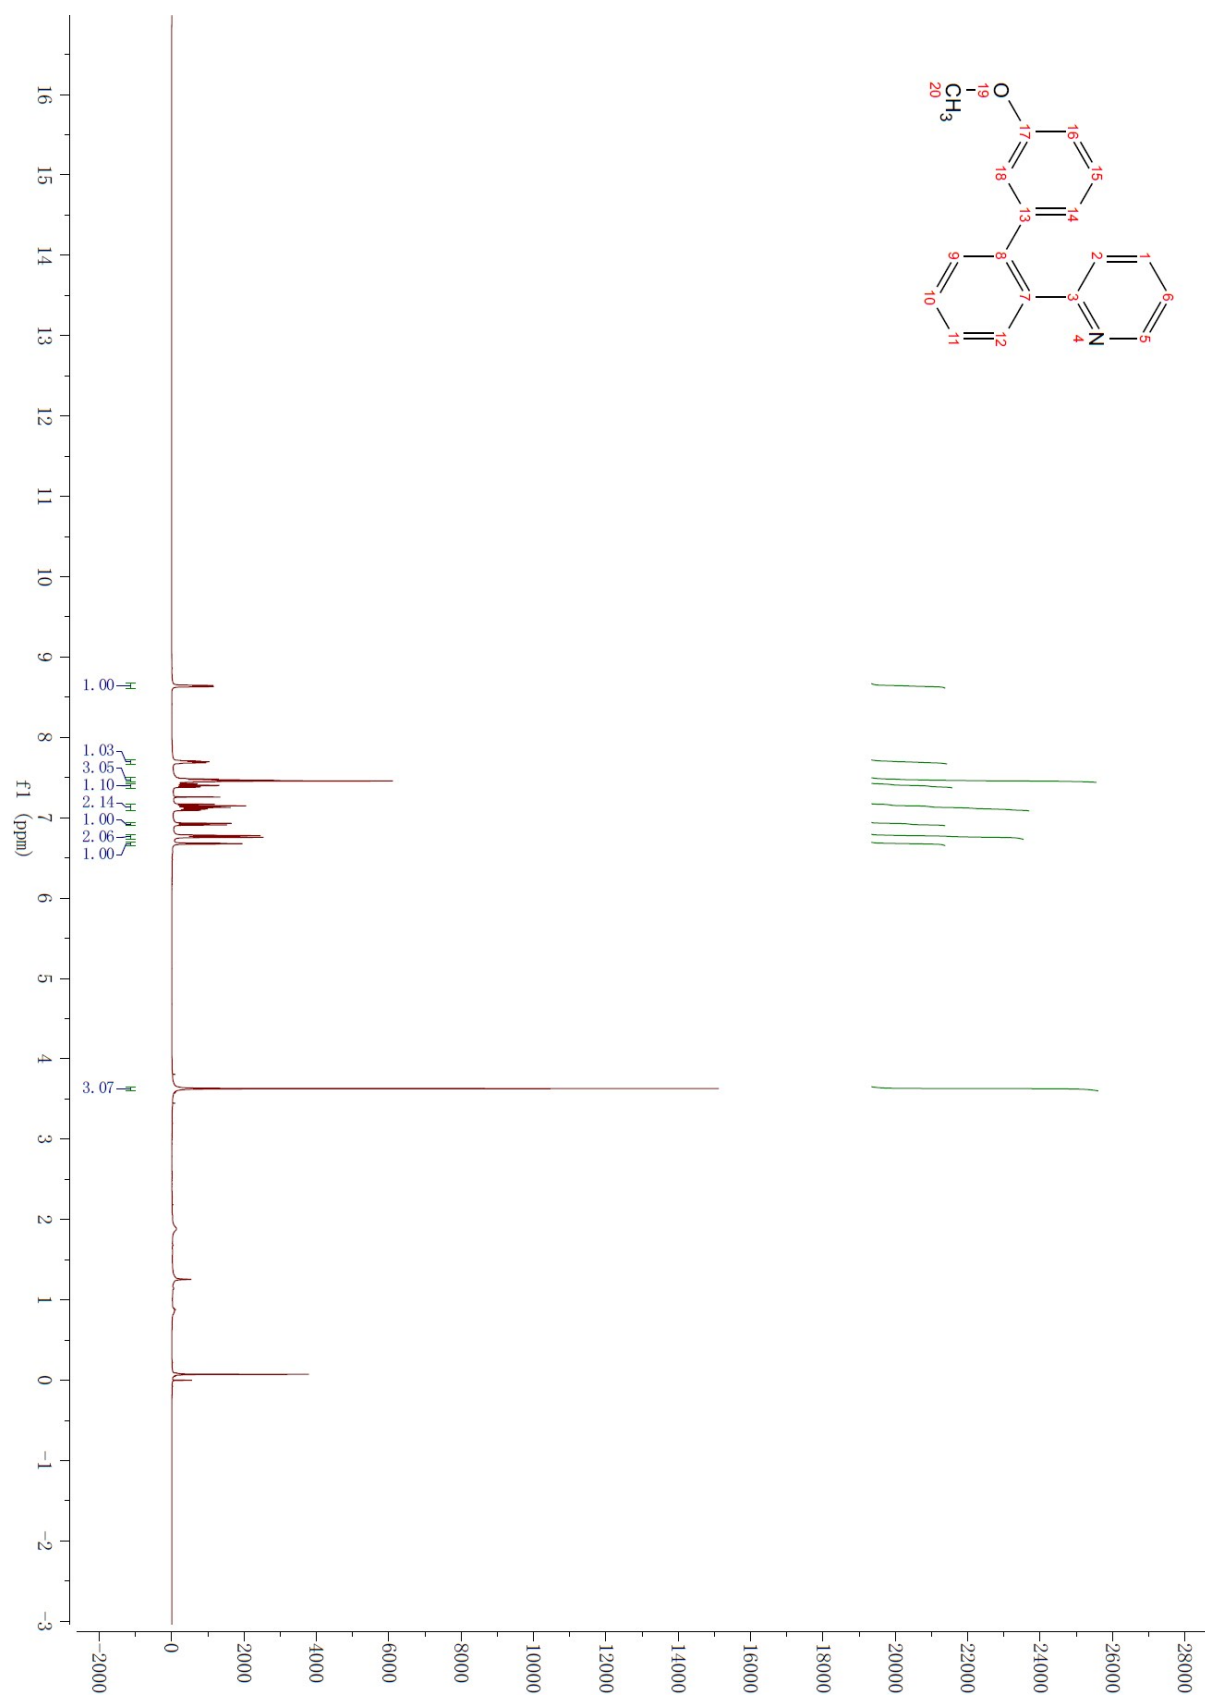

# <sup>13</sup>C NMR Spectrum of the Compound 3ag

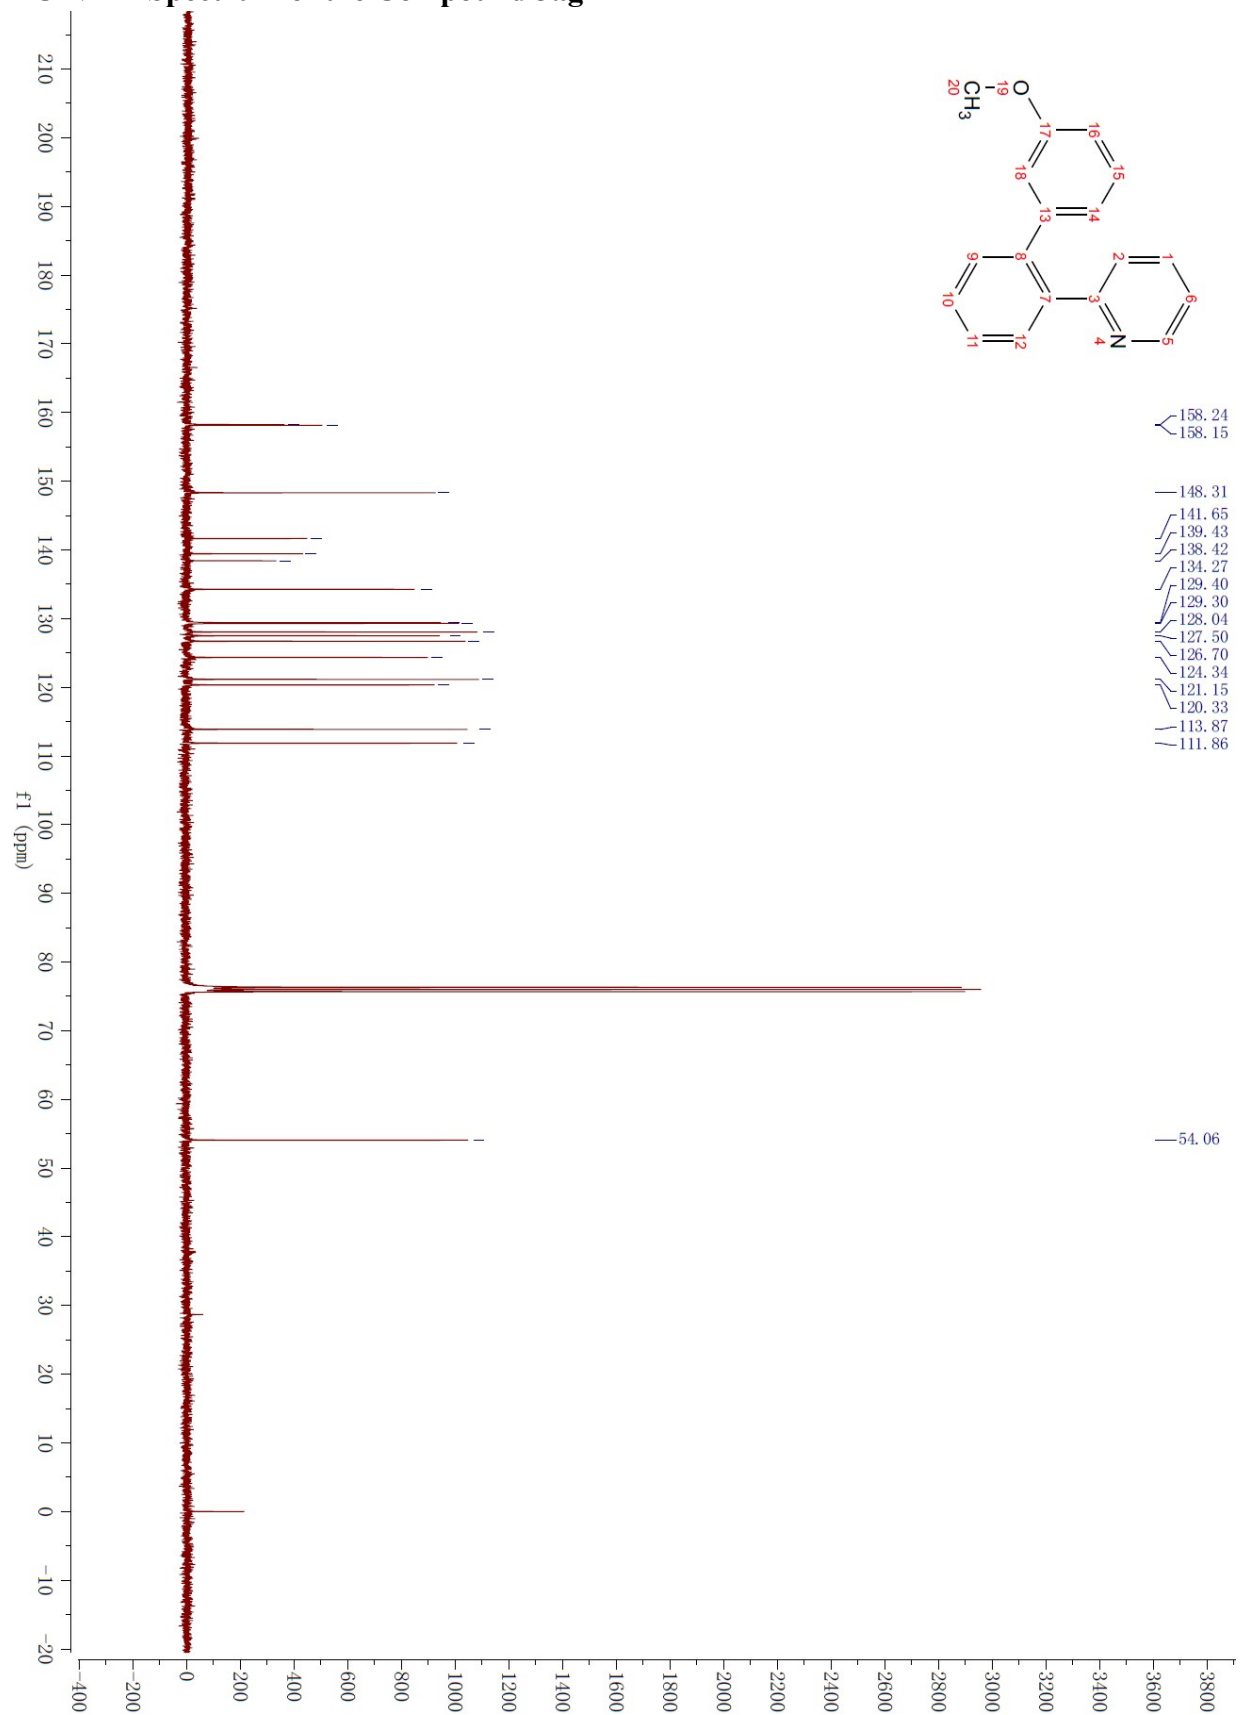

# <sup>1</sup>H NMR Spectrum of the Compound 4ag

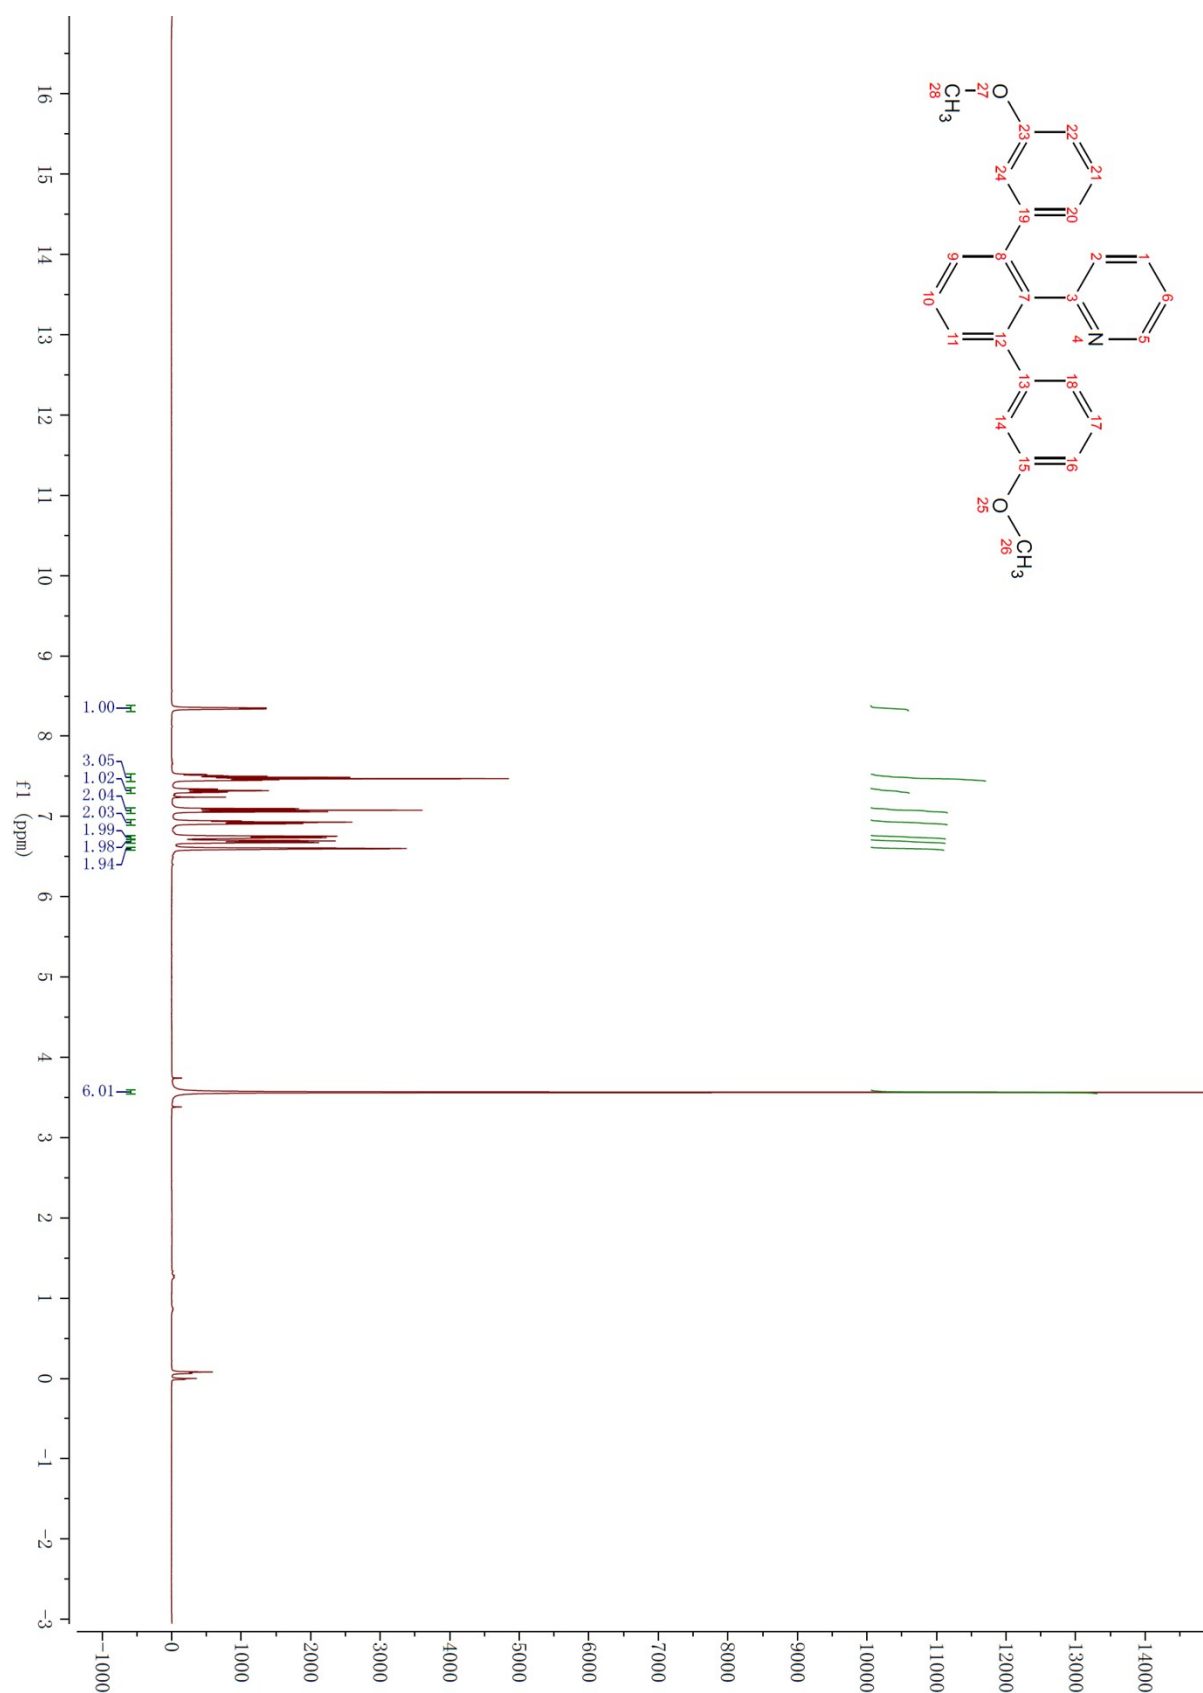

# <sup>13</sup>C NMR Spectrum of the Compound 4ag

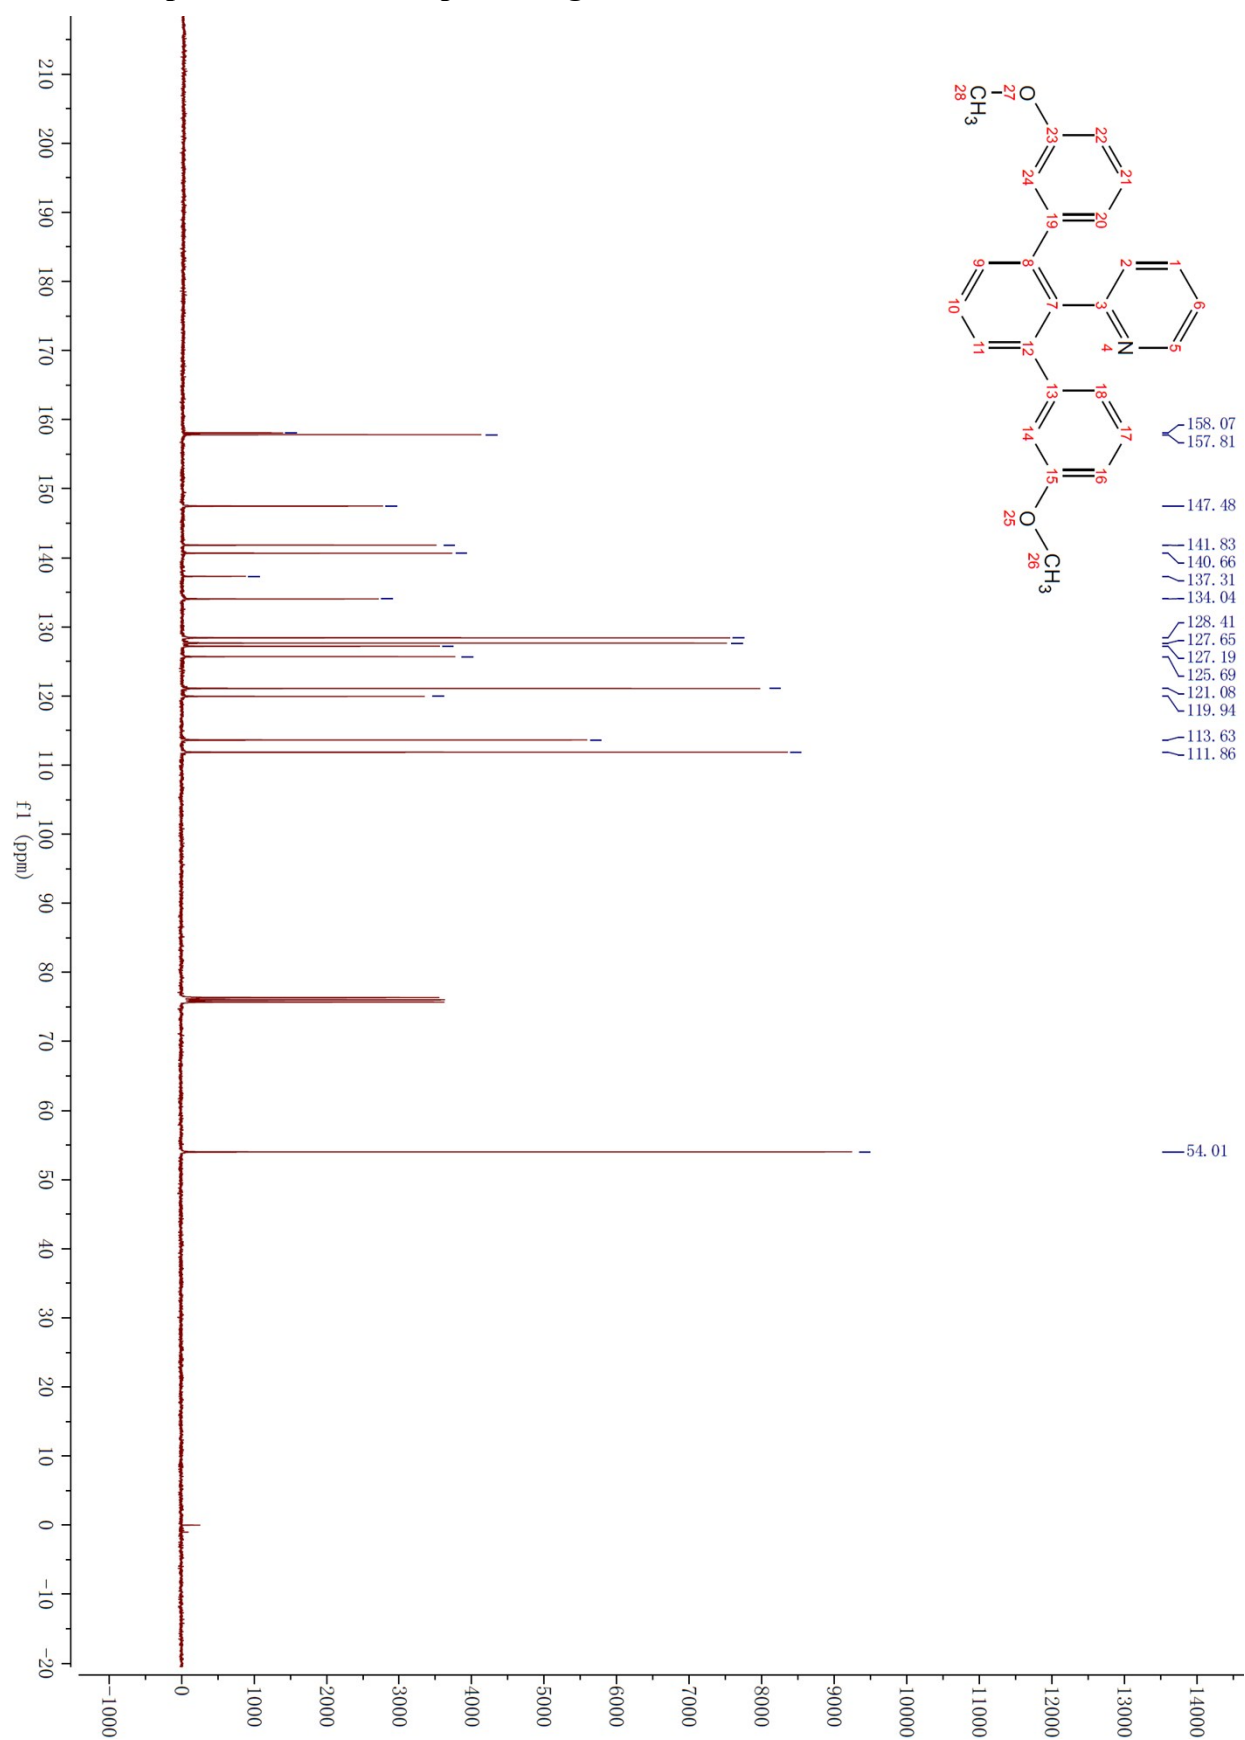

# <sup>1</sup>H NMR Spectrum of the Compound 3aa

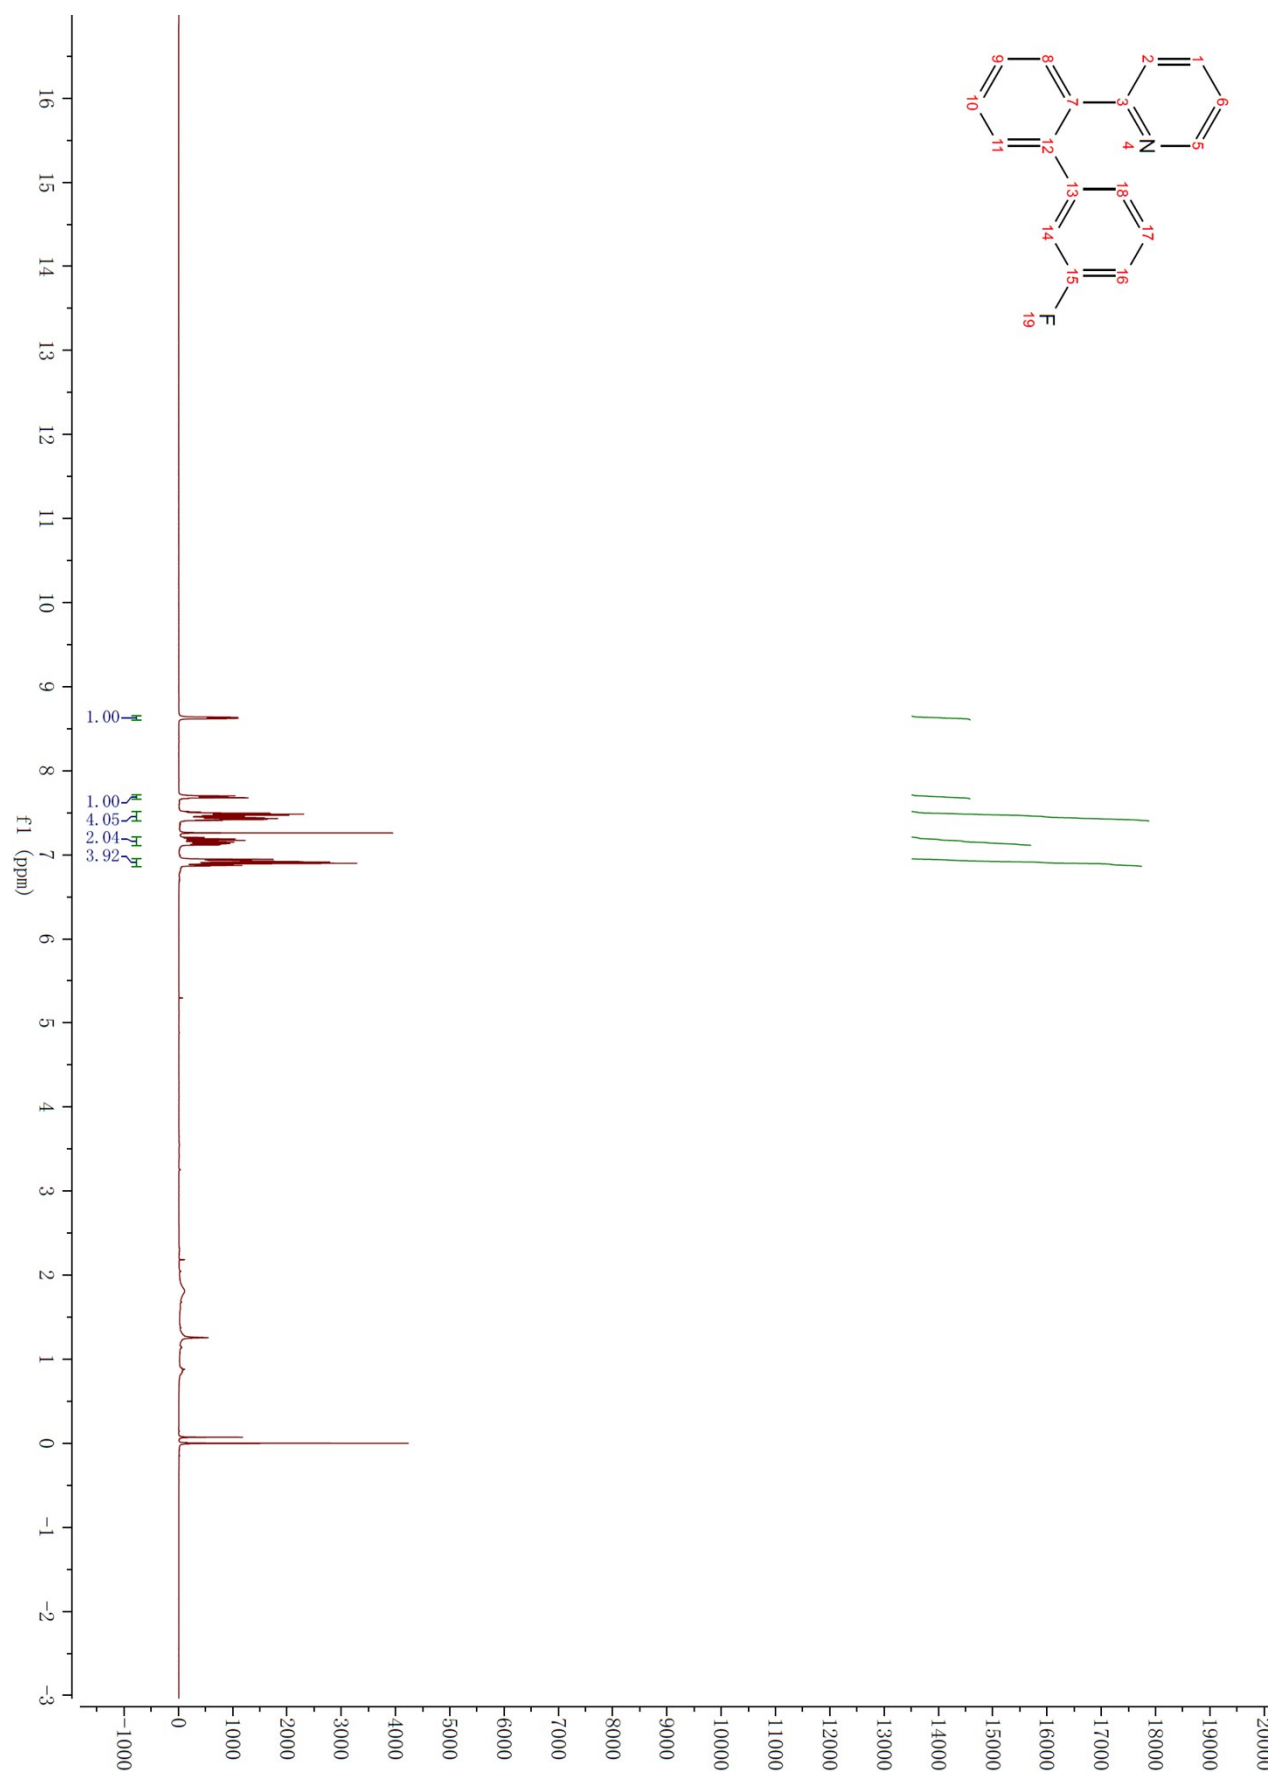

# <sup>13</sup>C NMR Spectrum of the Compound 3aa

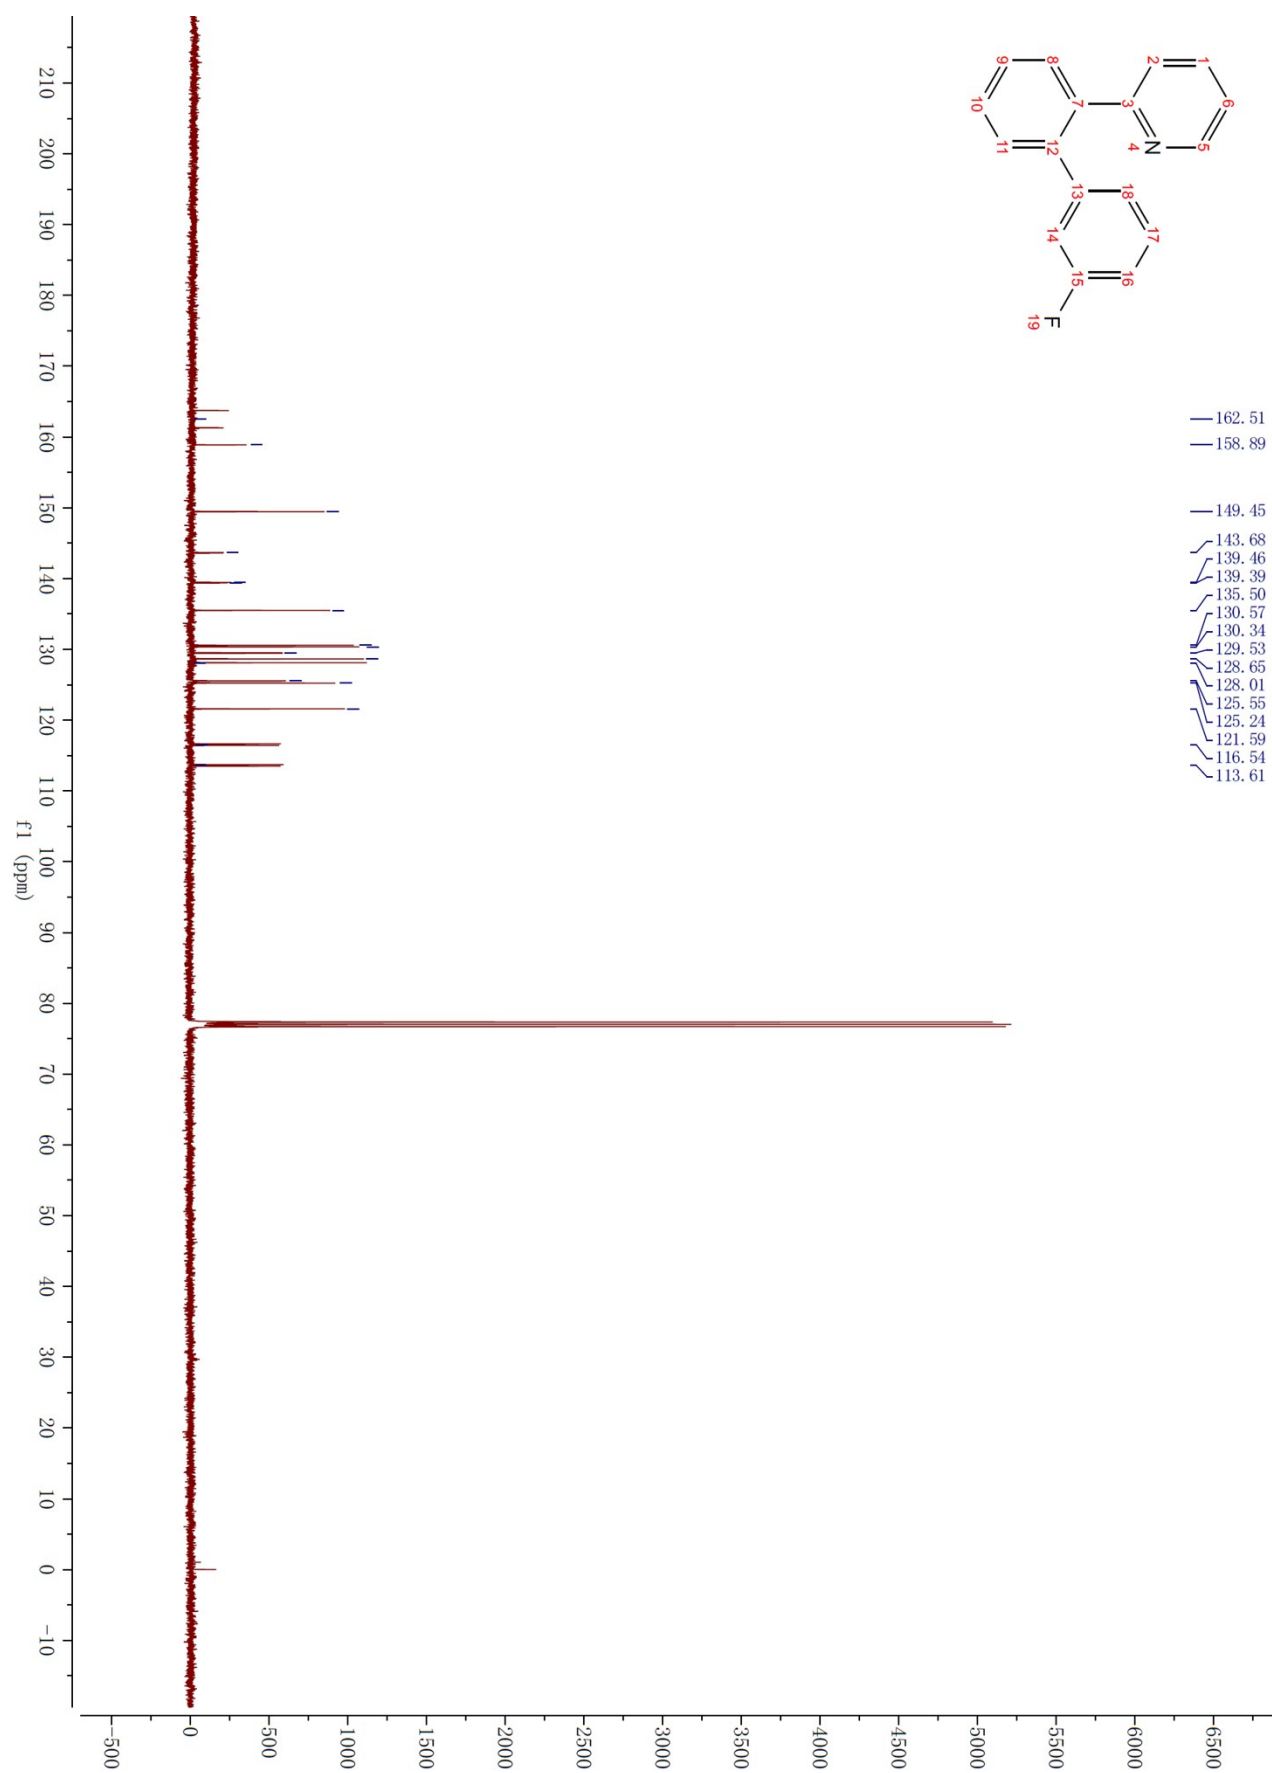

# <sup>1</sup>H NMR Spectrum of the Compound 4aa

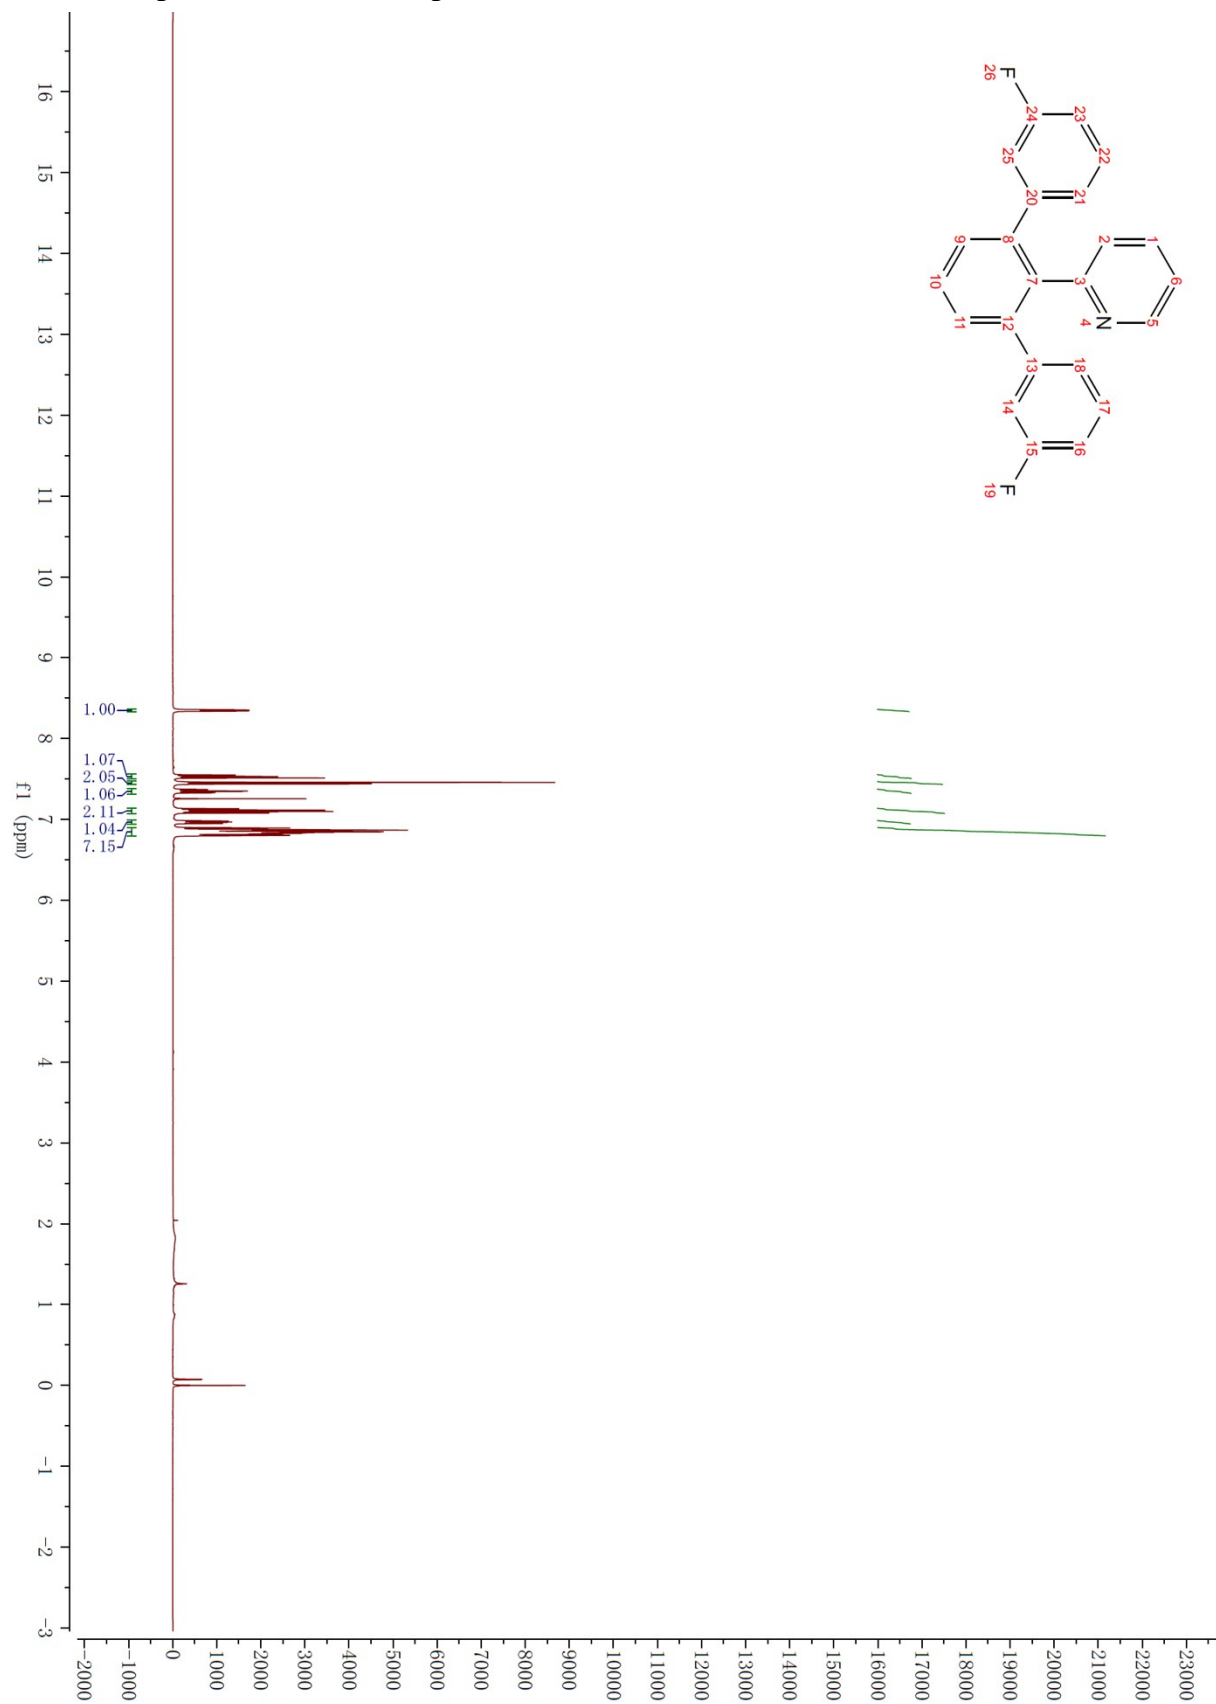



# <sup>13</sup>C NMR Spectrum of the Compound 4aa

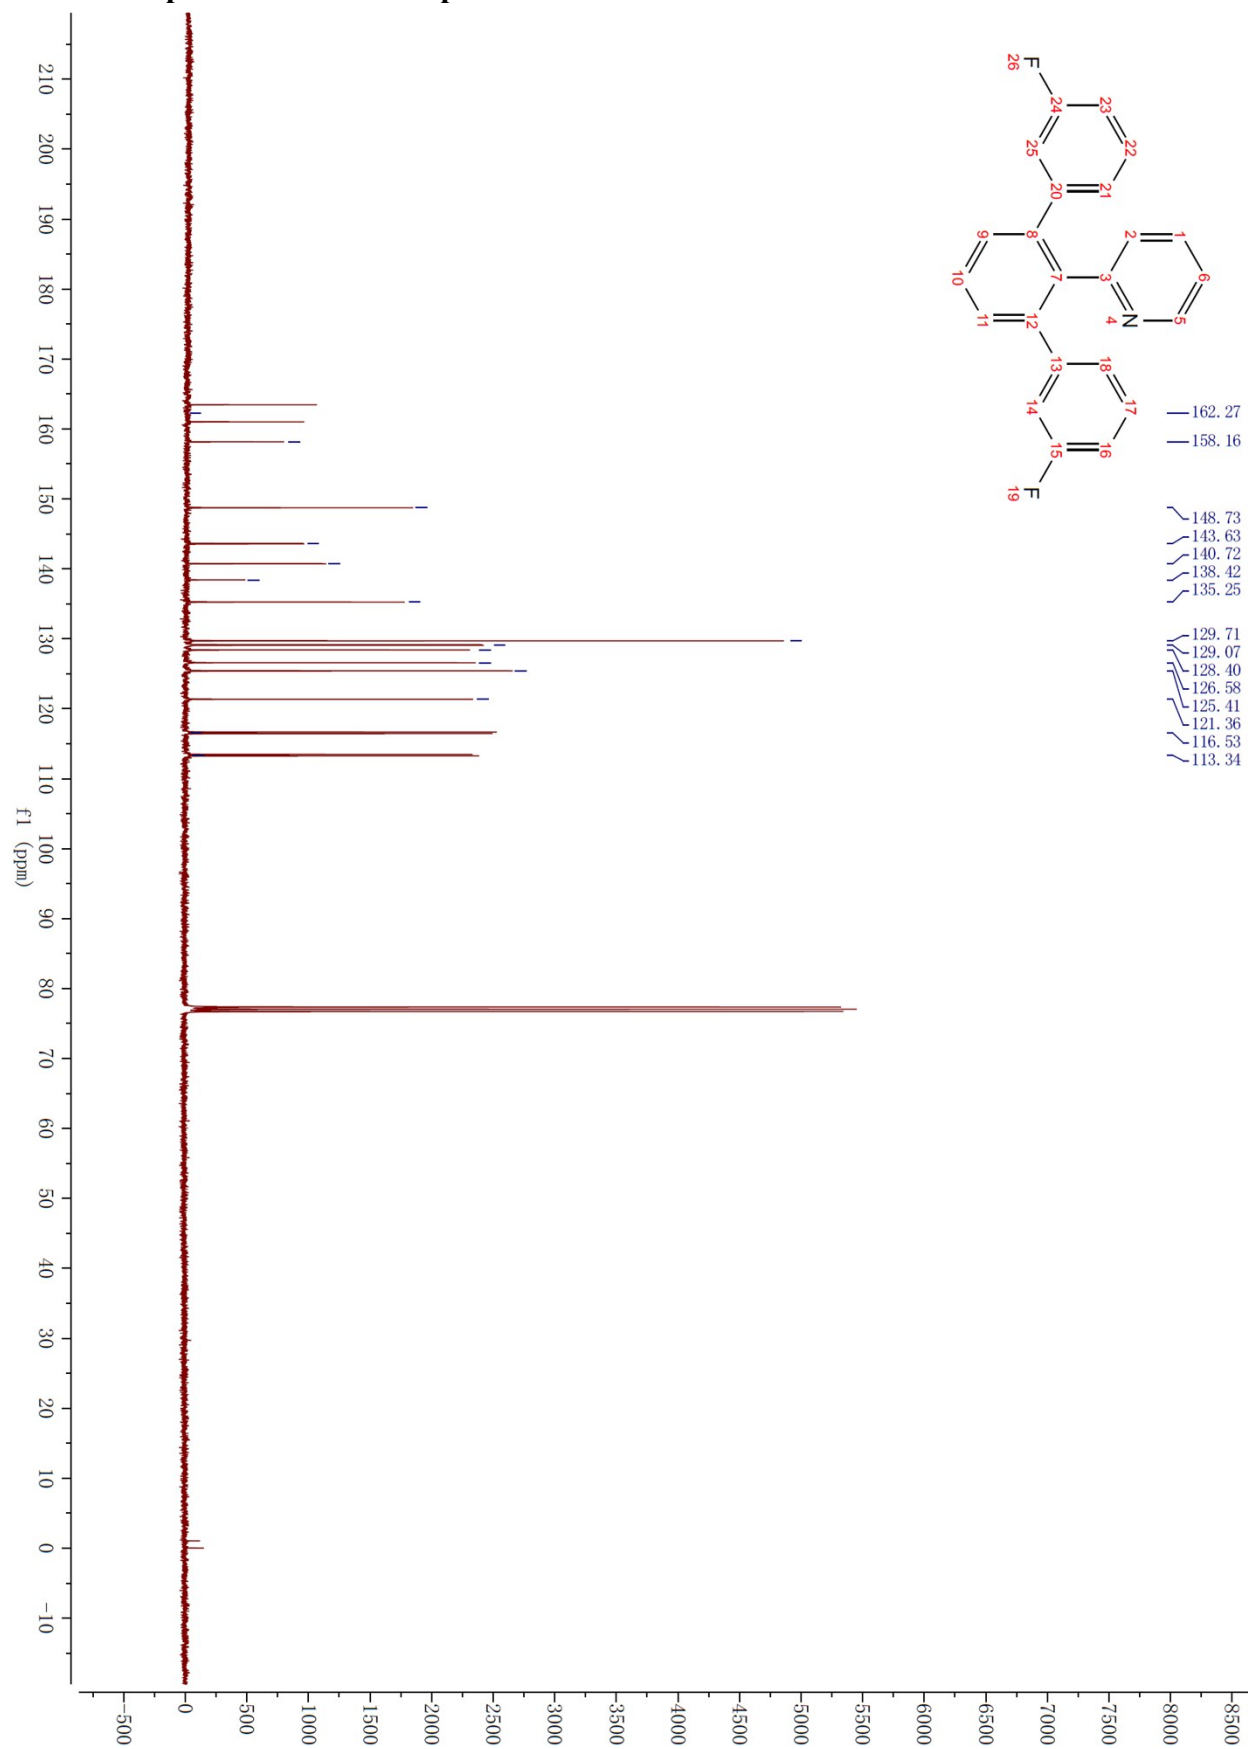

# <sup>1</sup>H NMR Spectrum of the Compound 3ad

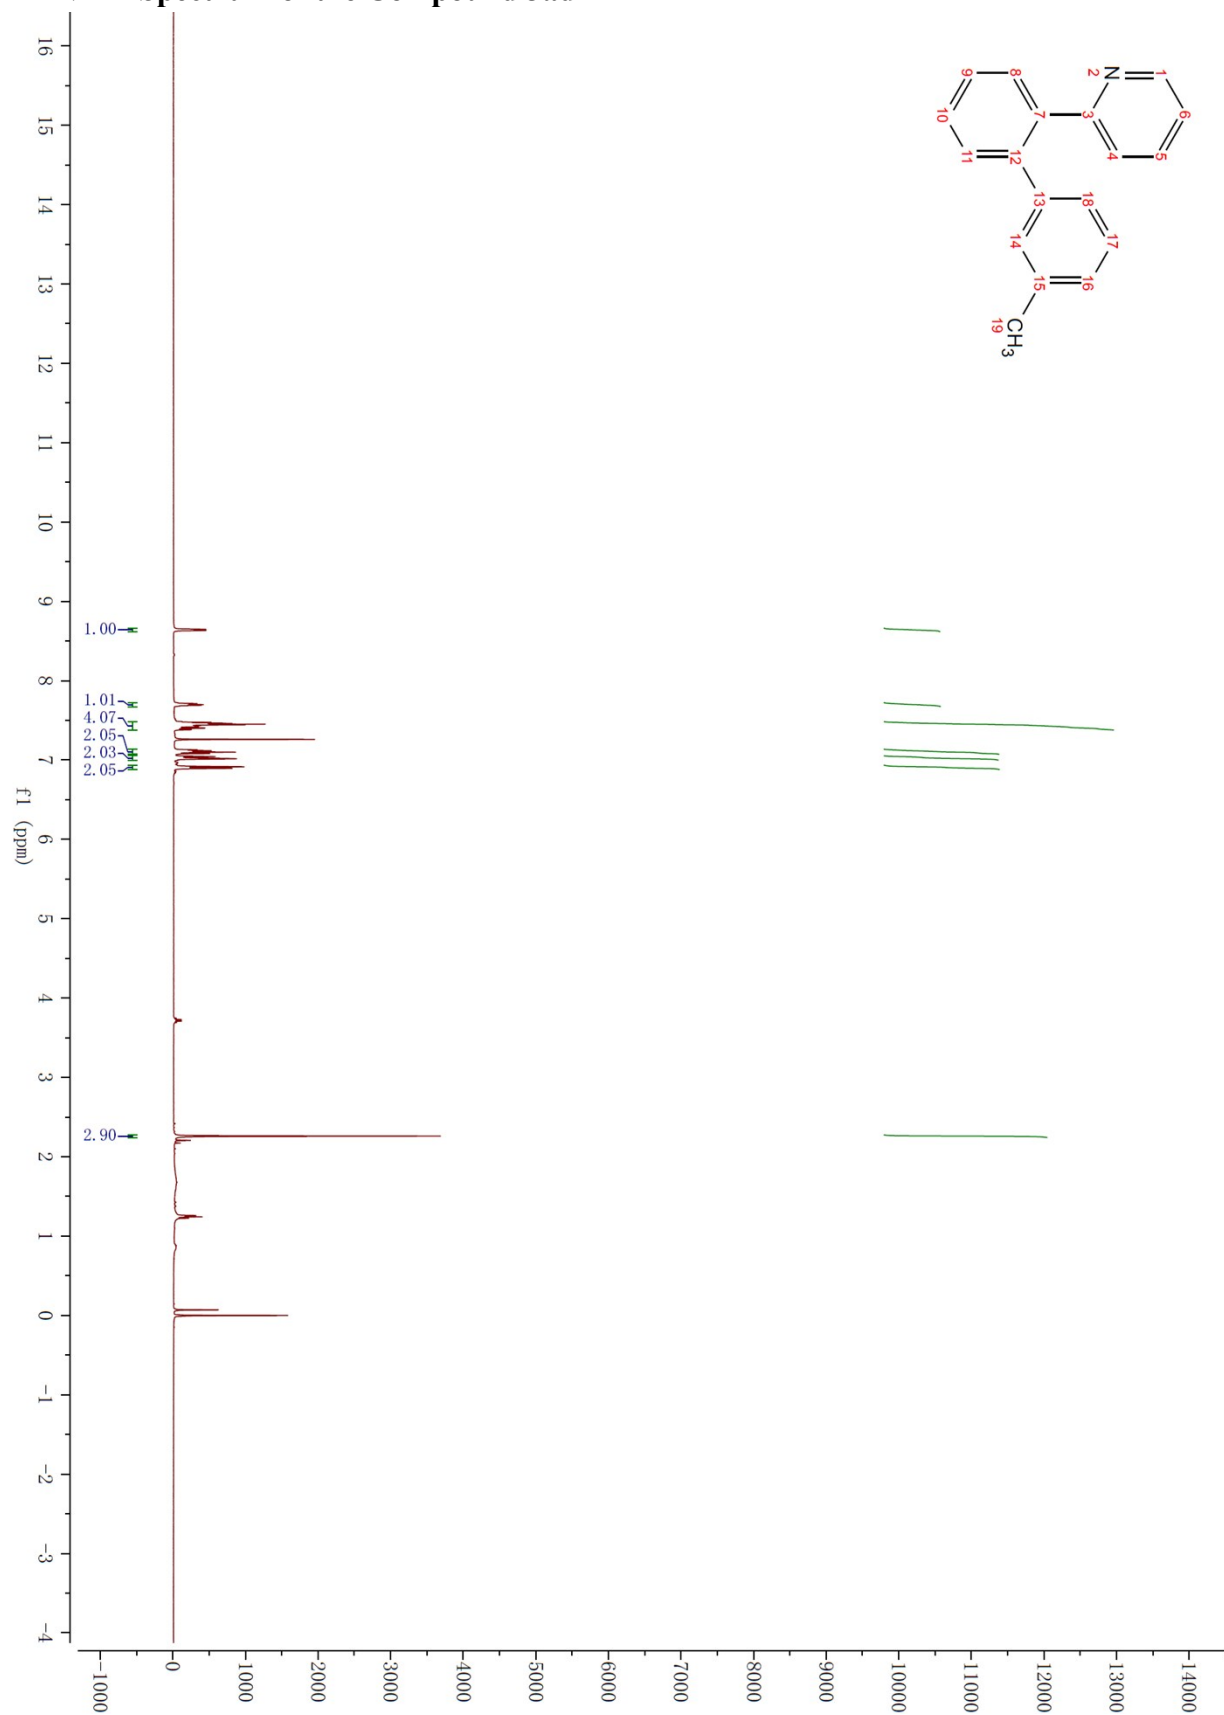

# <sup>13</sup>C NMR Spectrum of the Compound 3ad

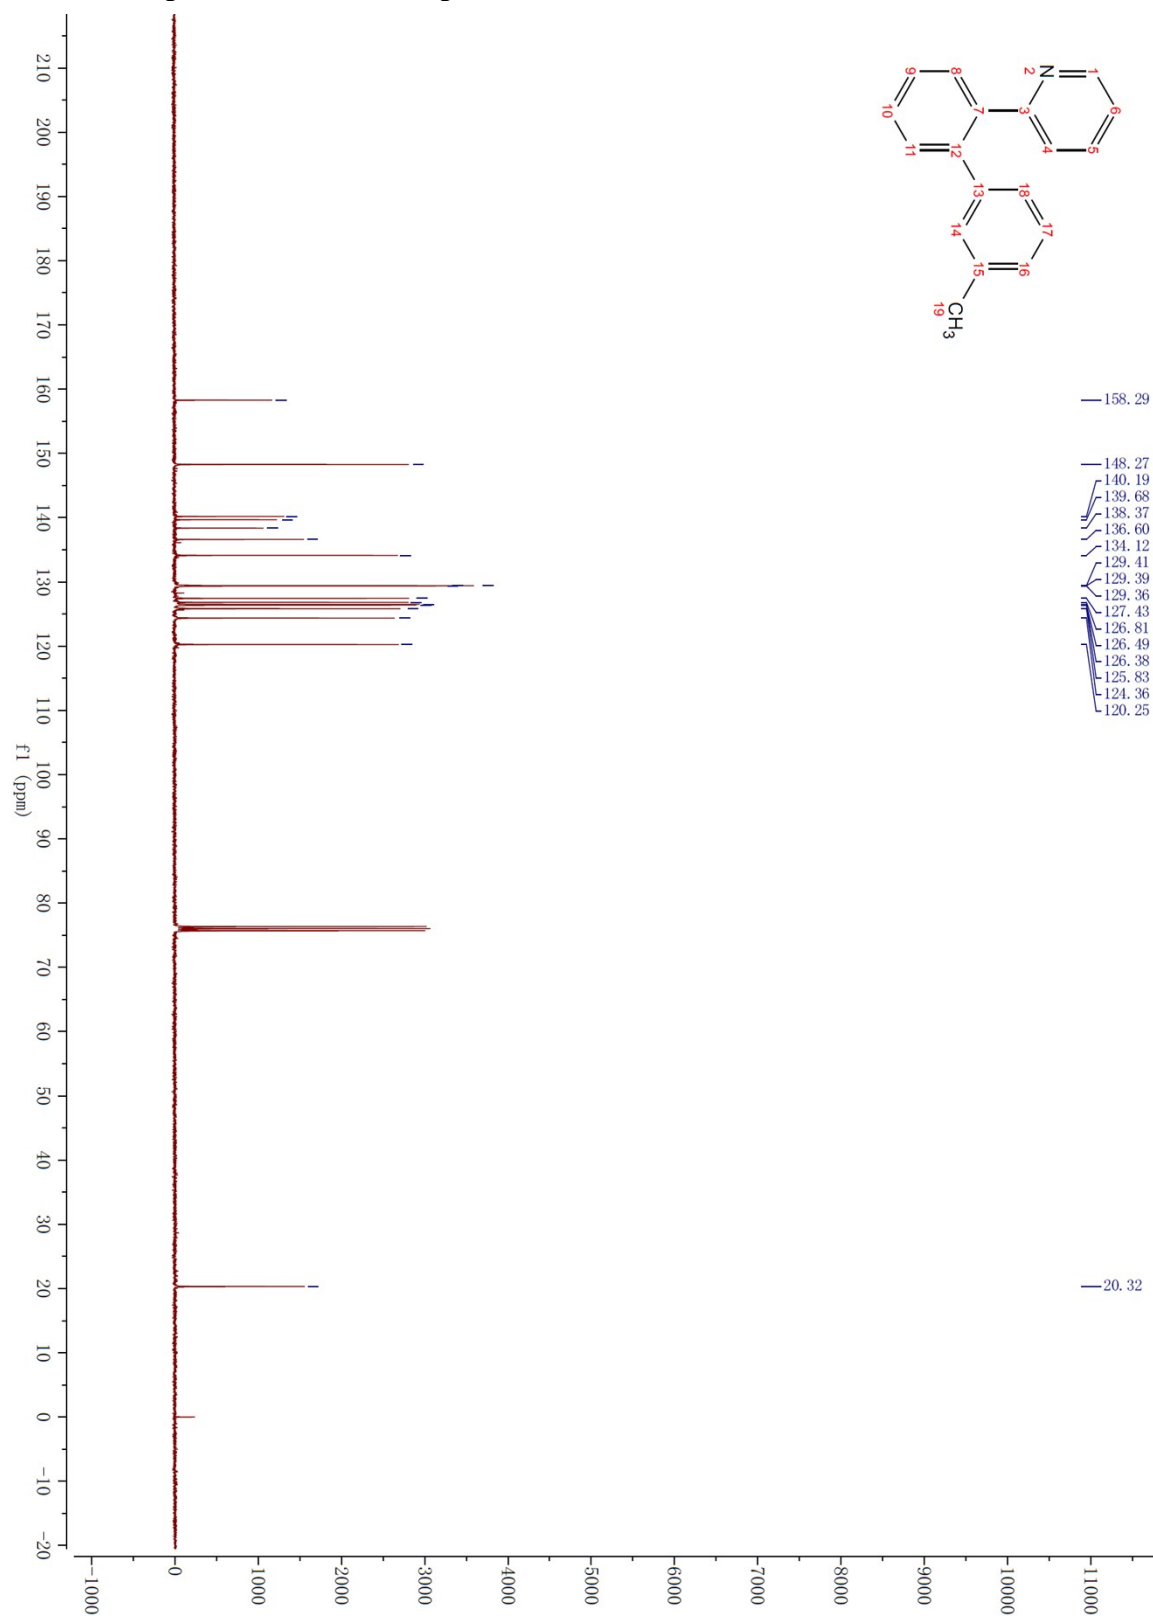

# <sup>1</sup>H NMR Spectrum of the Compound 4ad

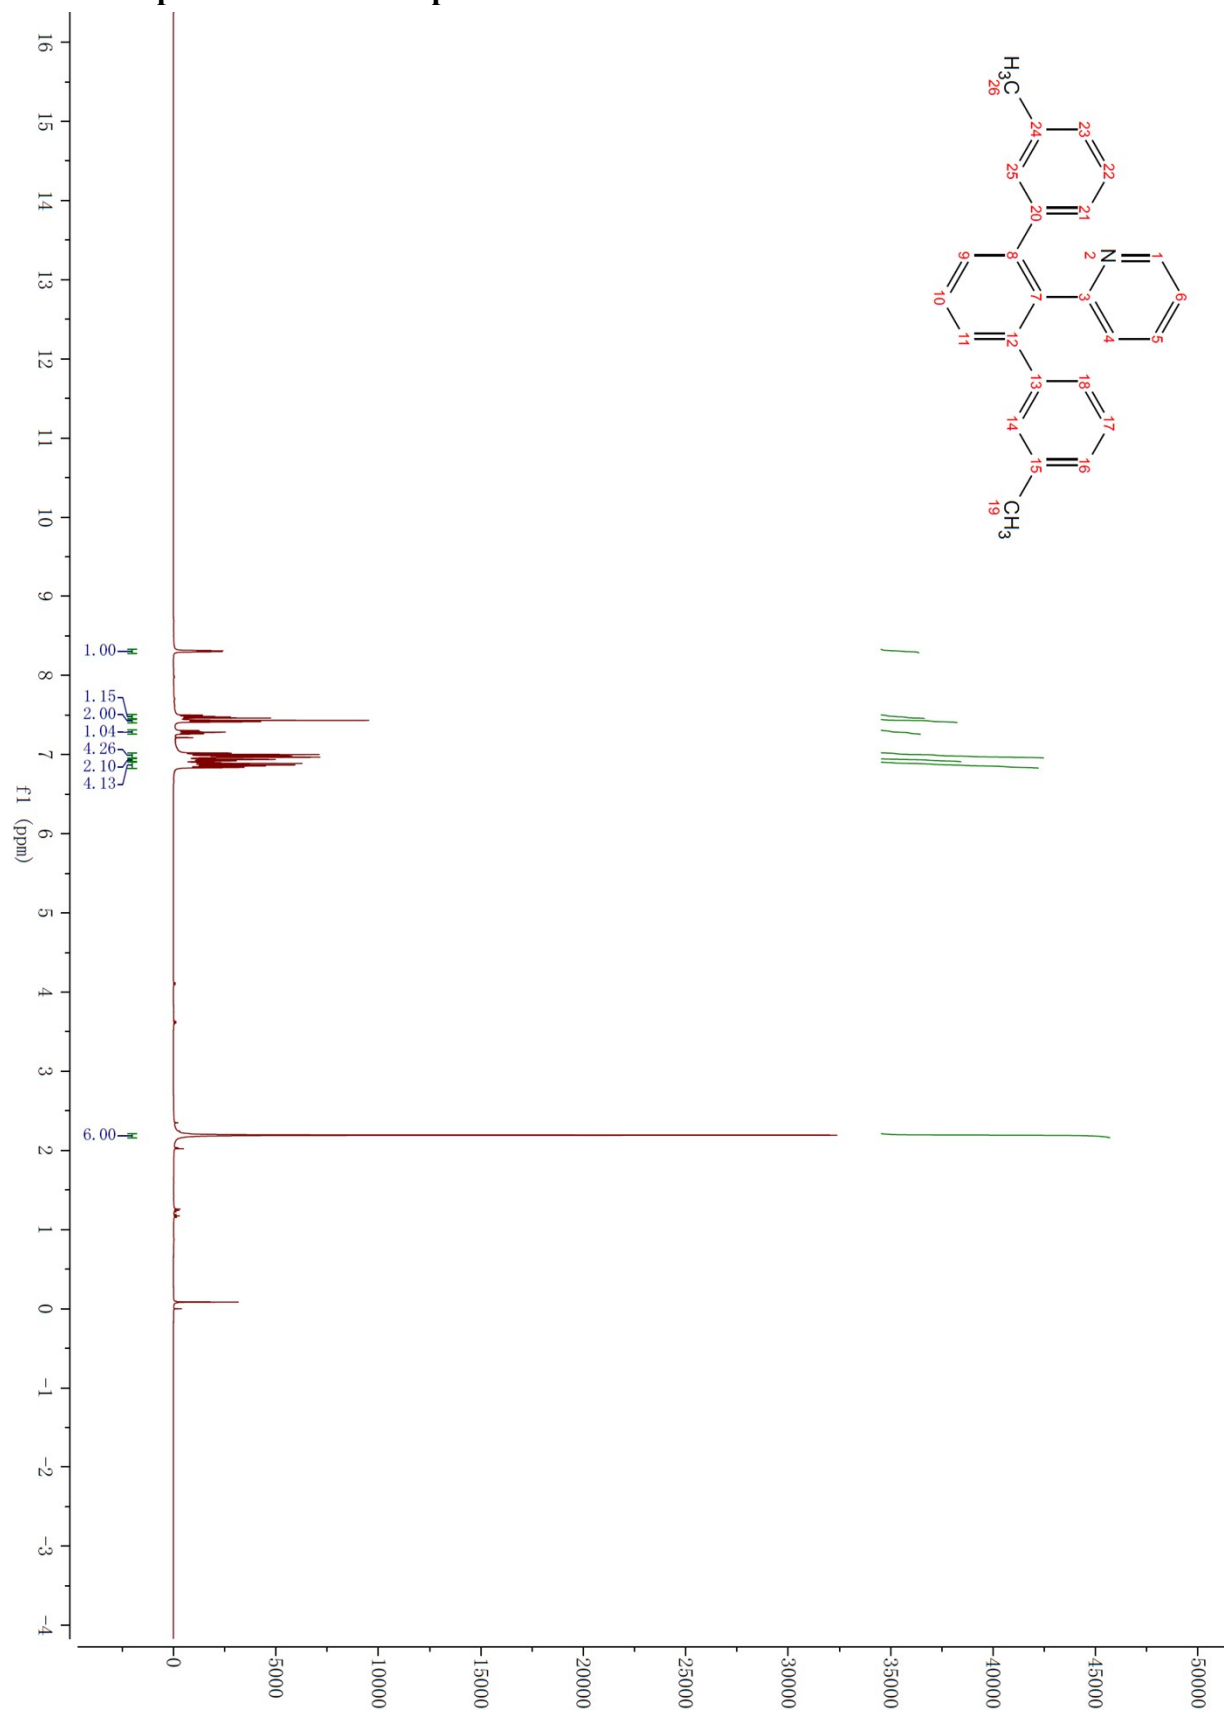

# <sup>13</sup>C NMR Spectrum of the Compound 4ad

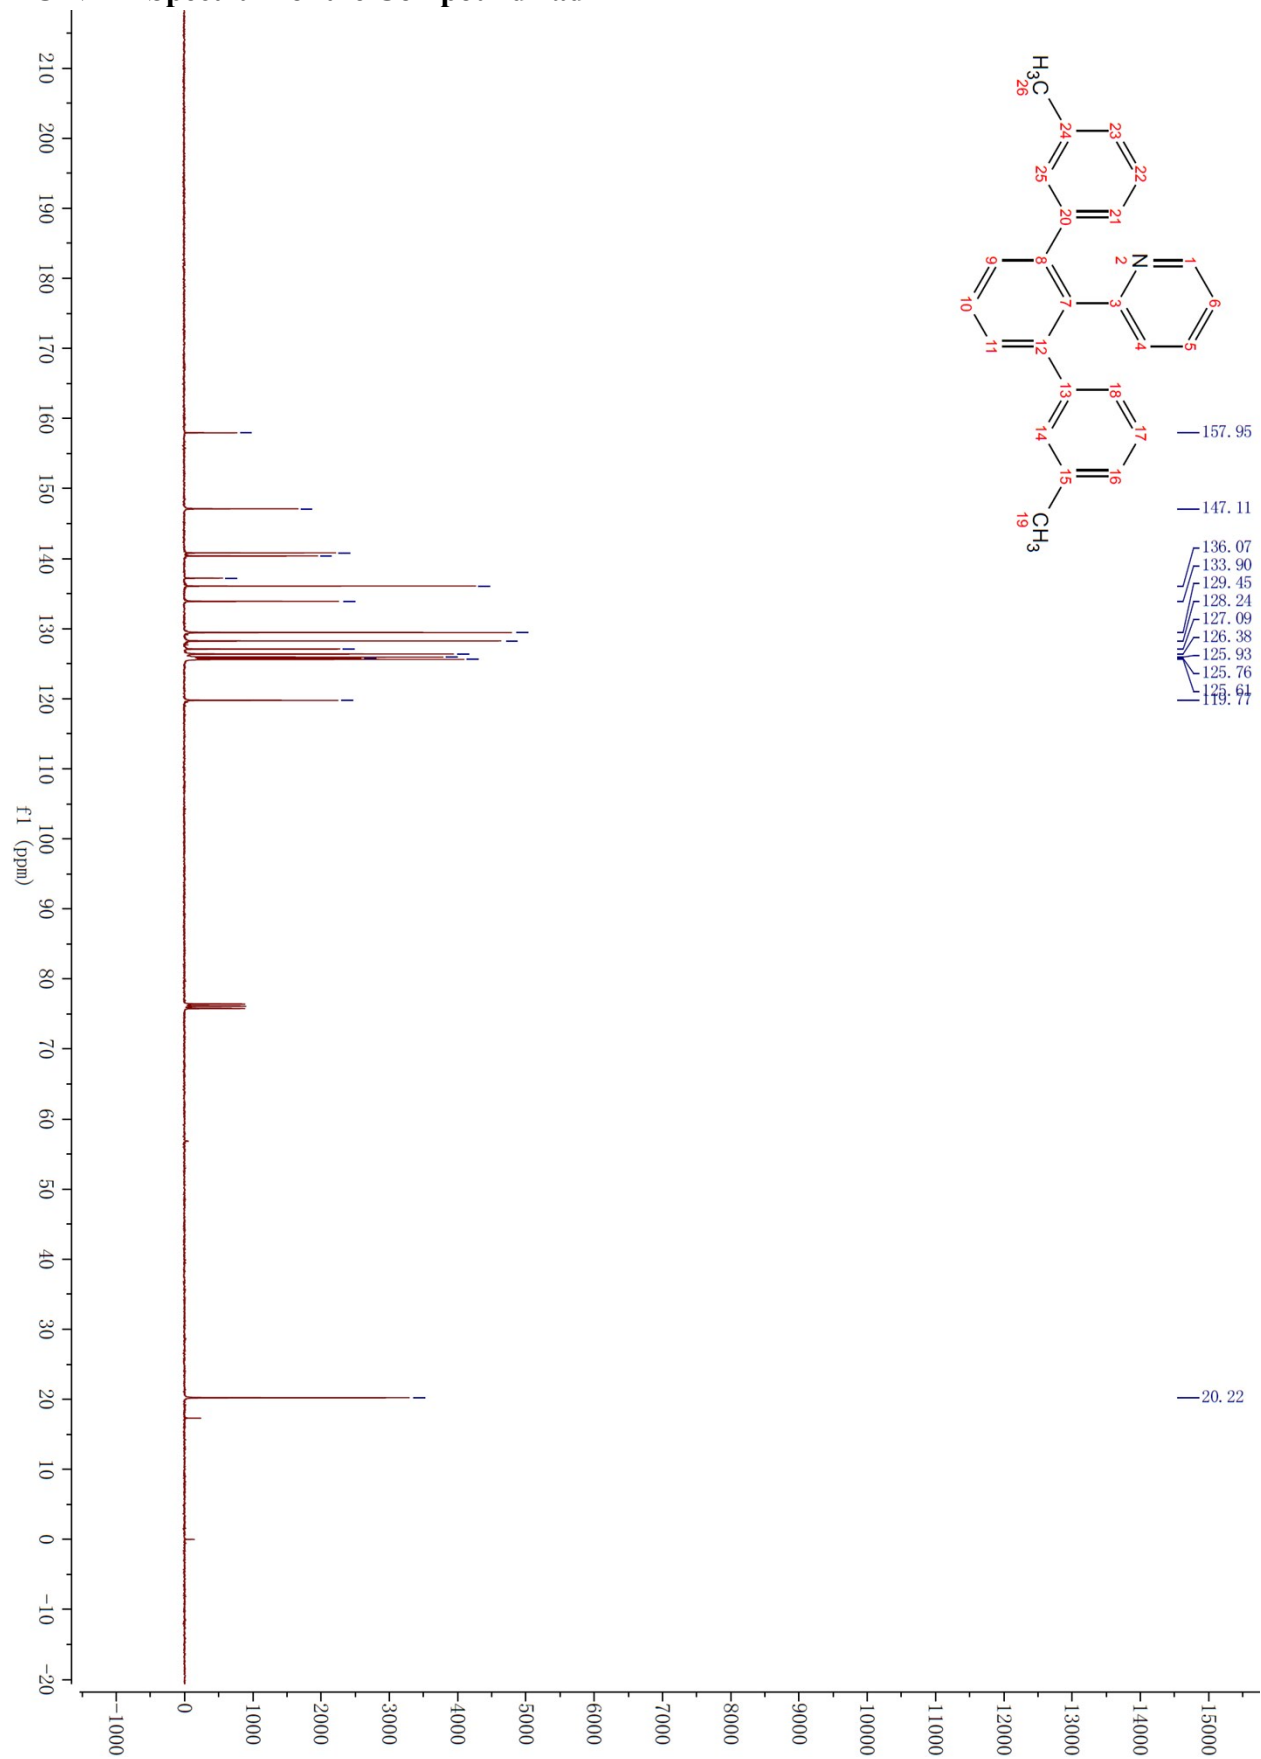

# <sup>1</sup>H NMR Spectrum of the Compound 3ar

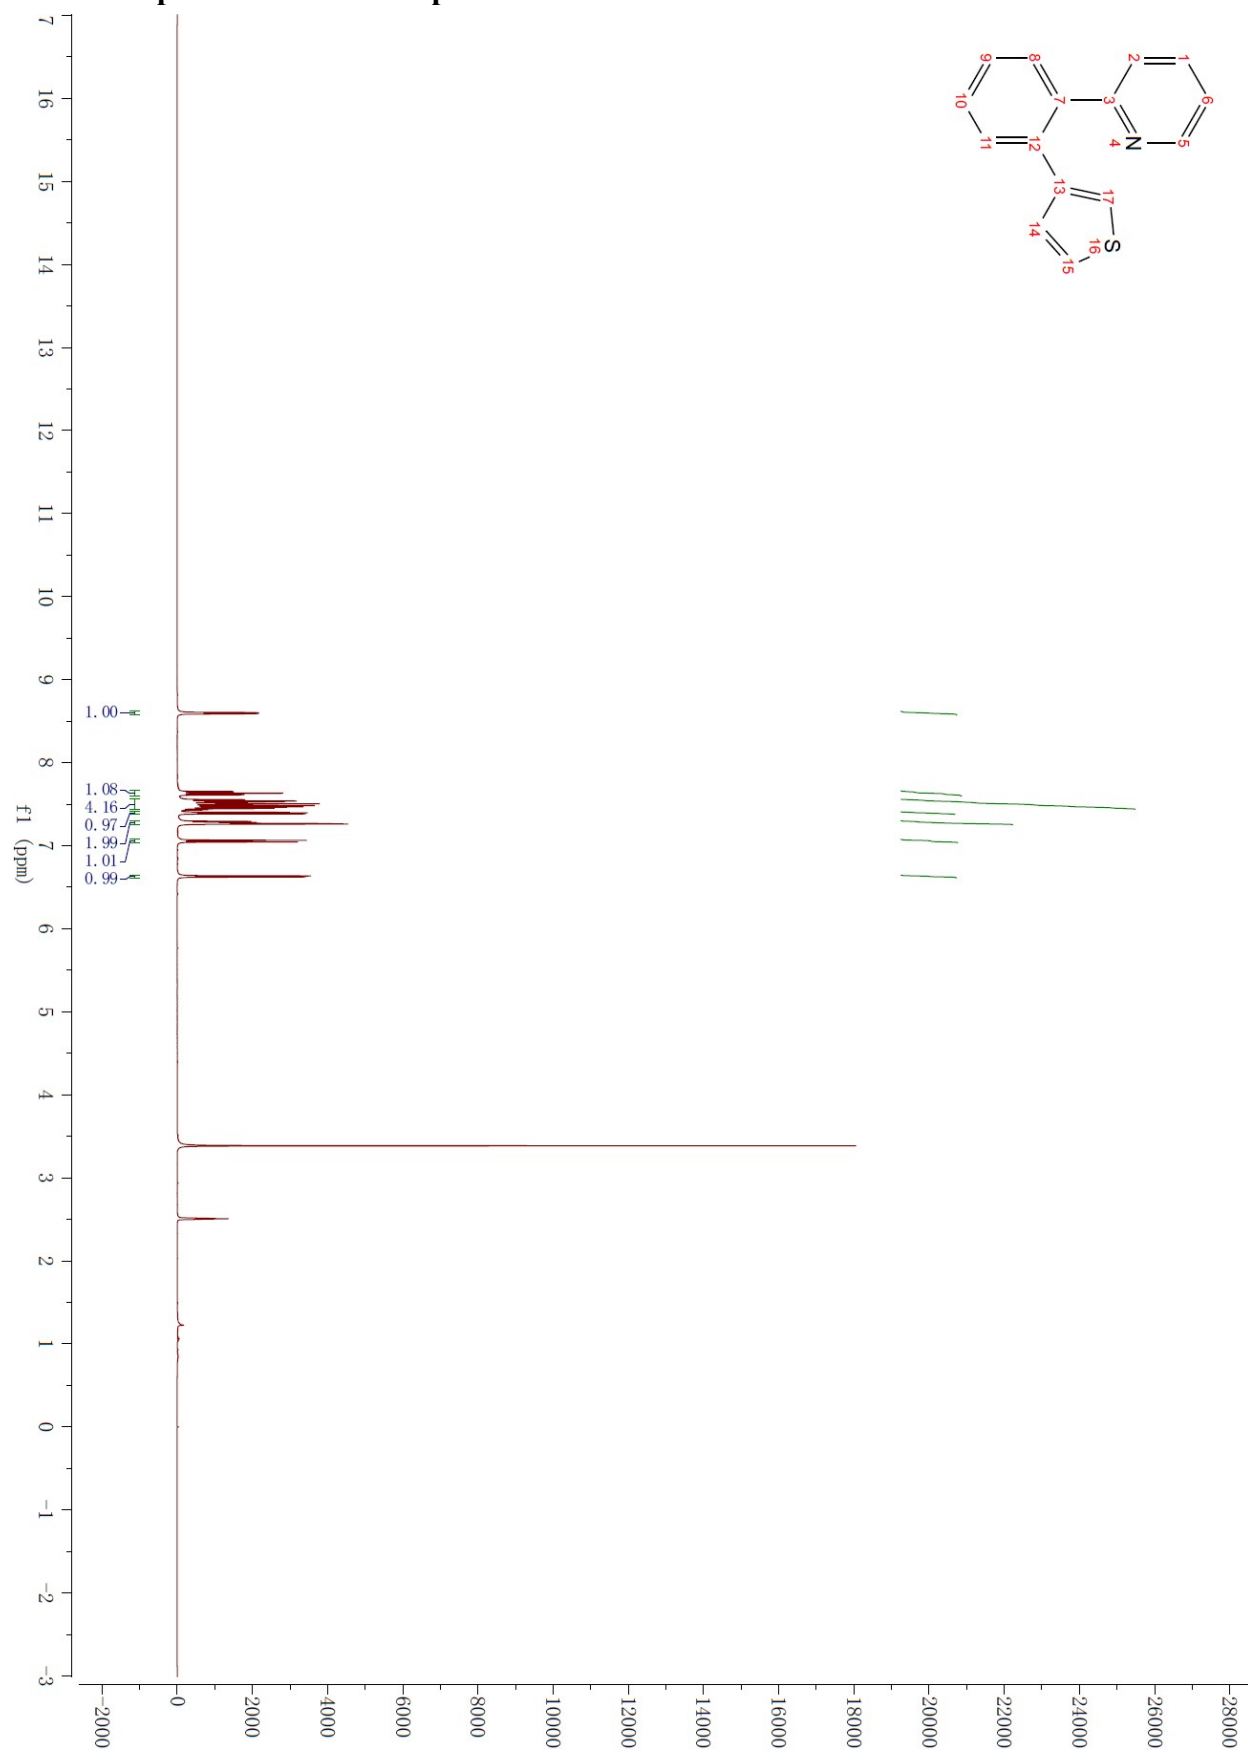

# <sup>13</sup>C NMR Spectrum of the Compound 3ar

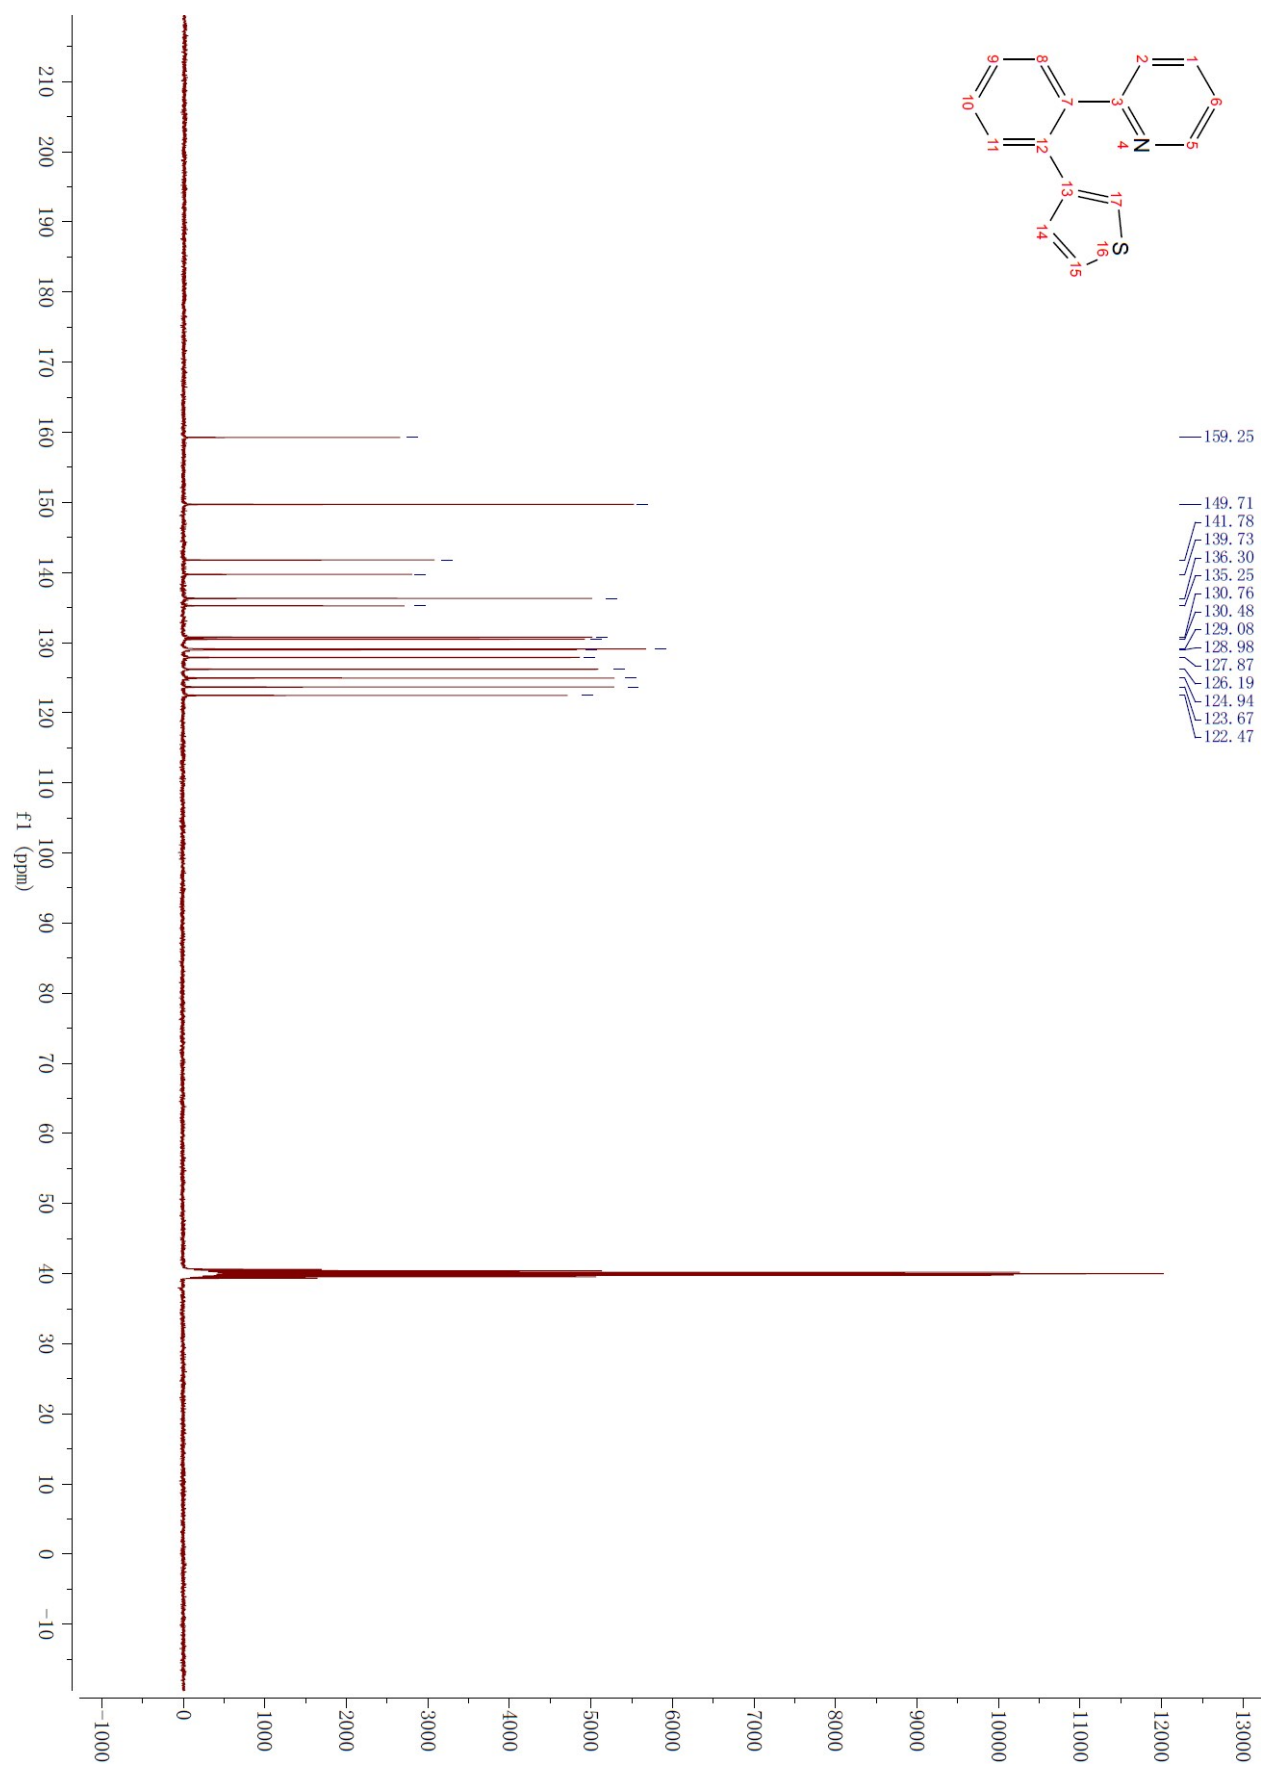

# <sup>1</sup>H NMR Spectrum of the Compound 4ar

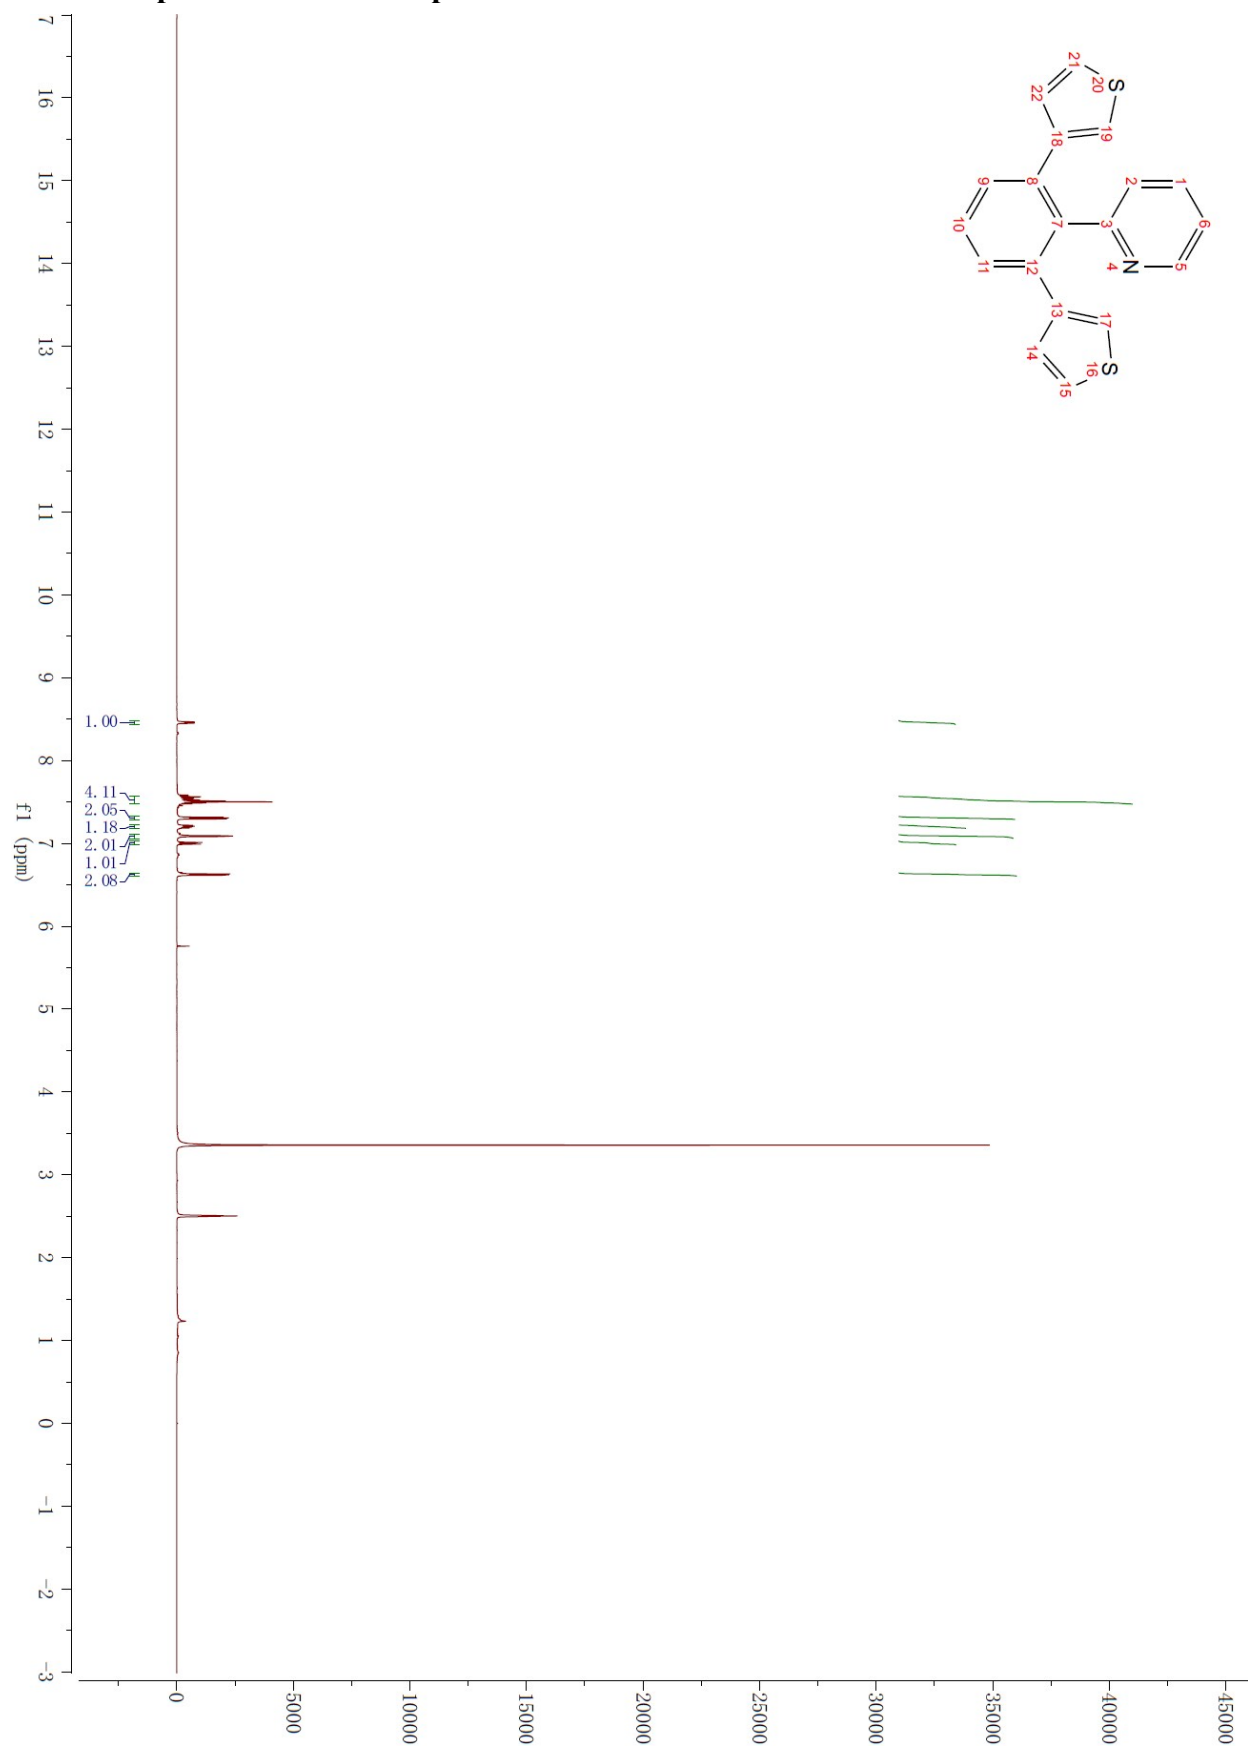



# <sup>13</sup>C NMR Spectrum of the Compound 4ar

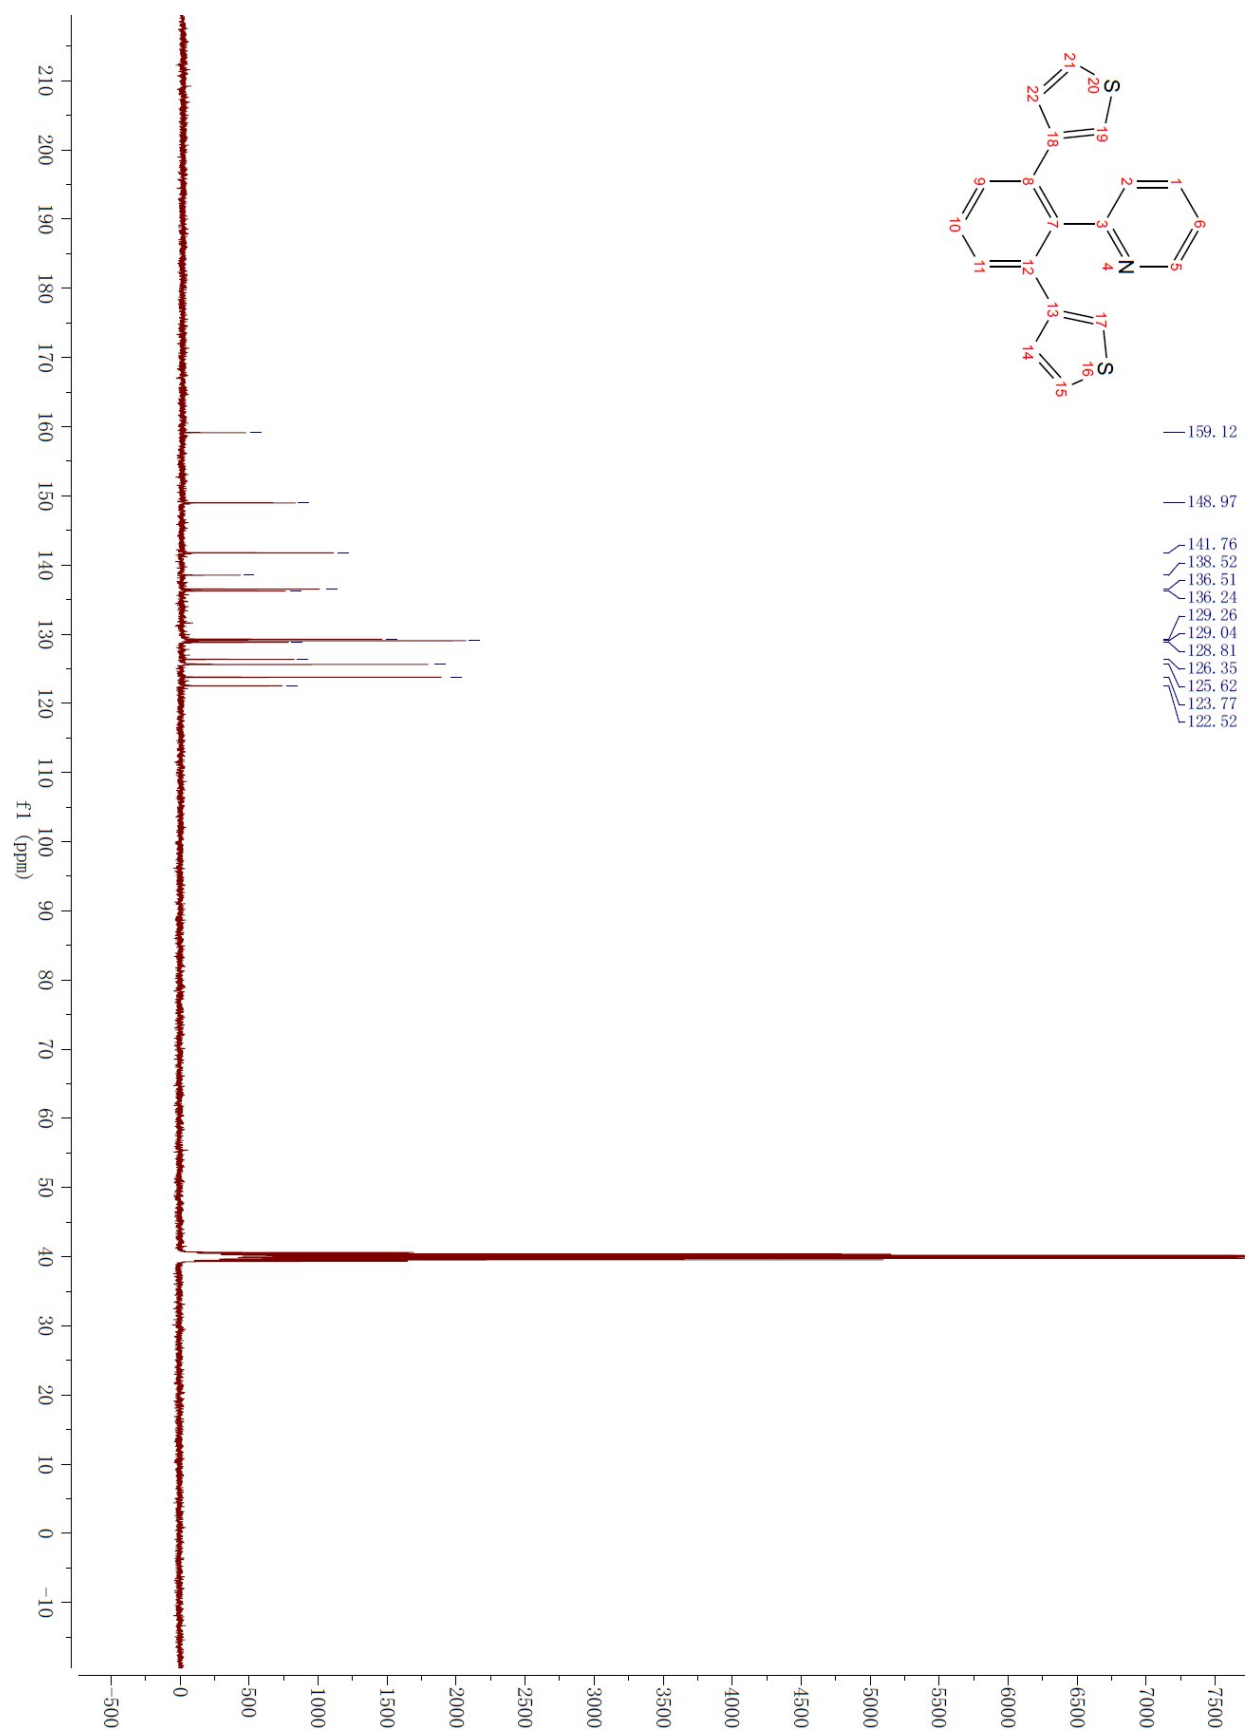

# <sup>1</sup>H NMR Spectrum of the Compound 3al

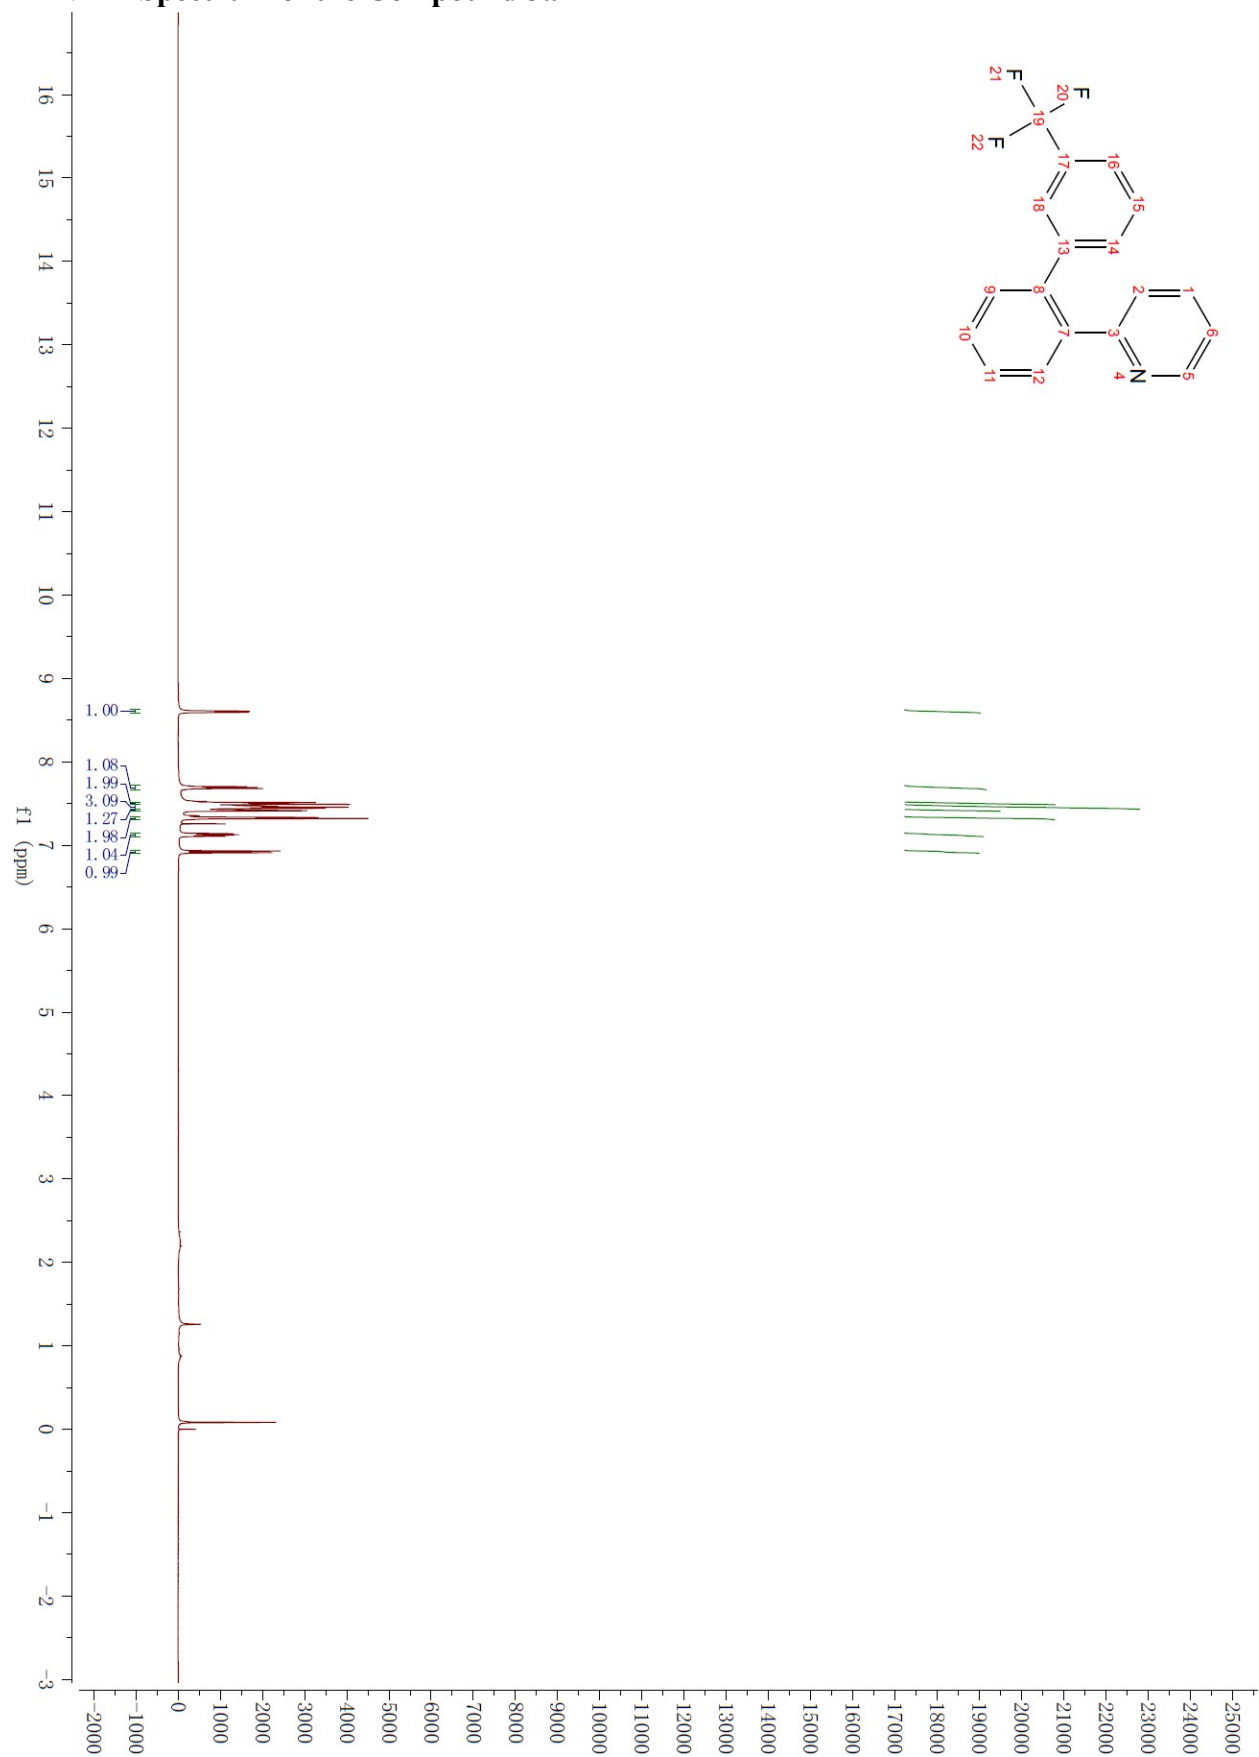

# <sup>13</sup>C NMR Spectrum of the Compound 3al

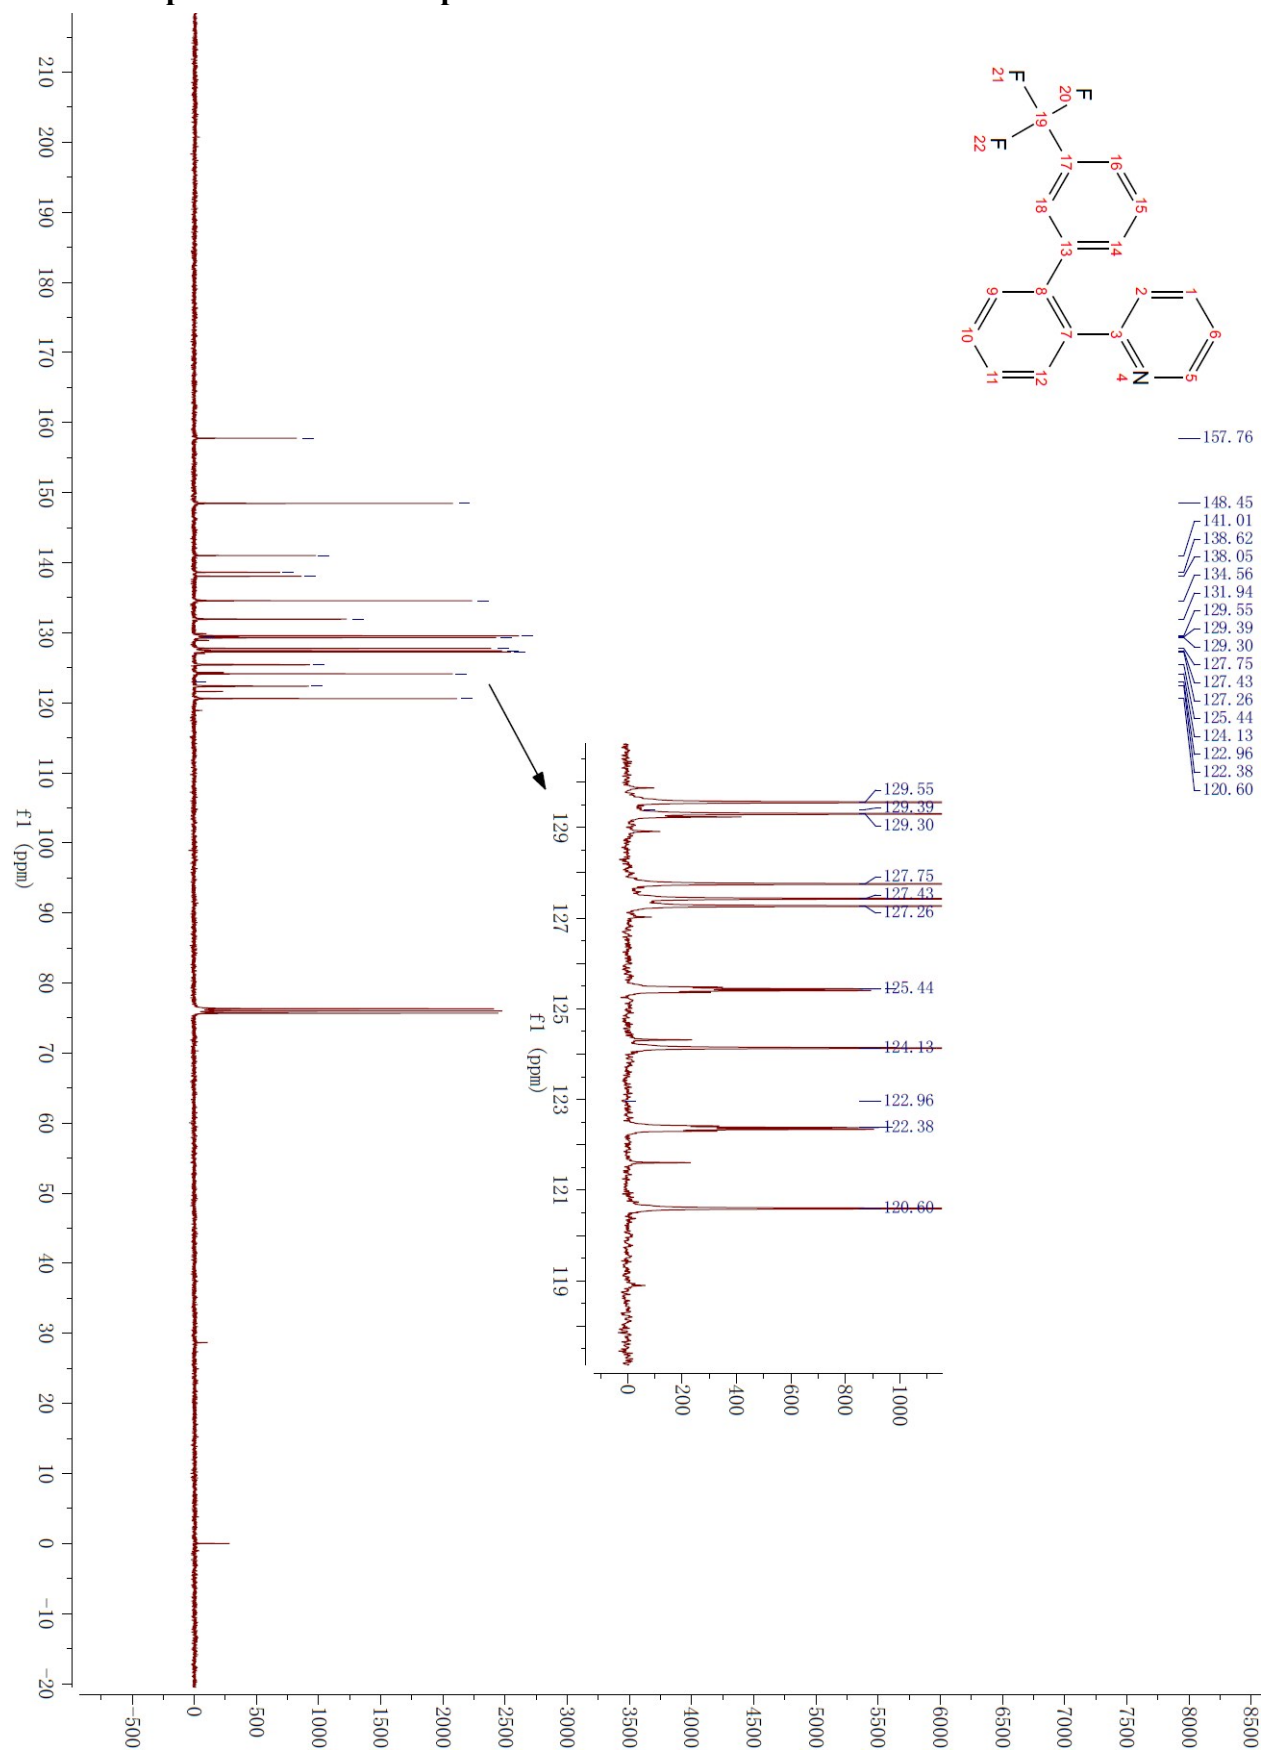

# <sup>1</sup>H NMR Spectrum of the Compound 4al

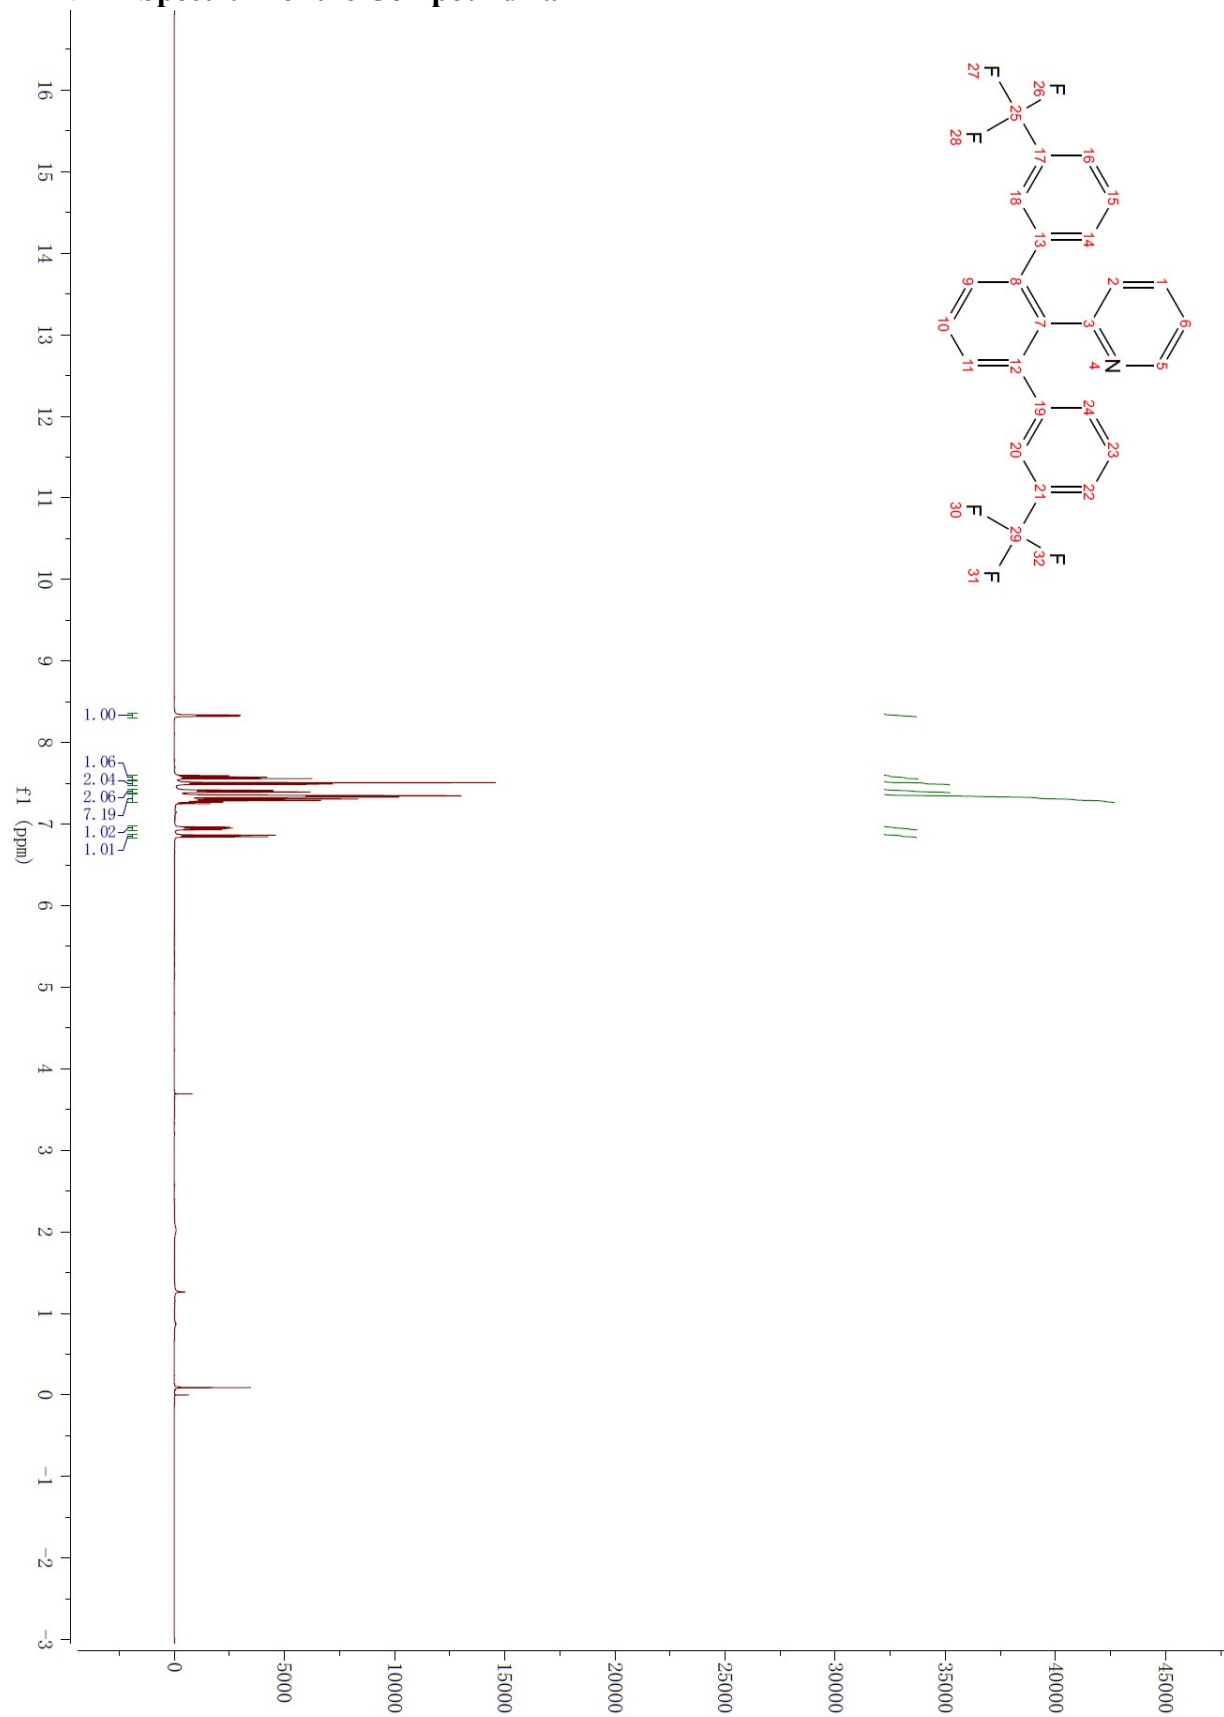

# <sup>13</sup>C NMR Spectrum of the Compound 4al

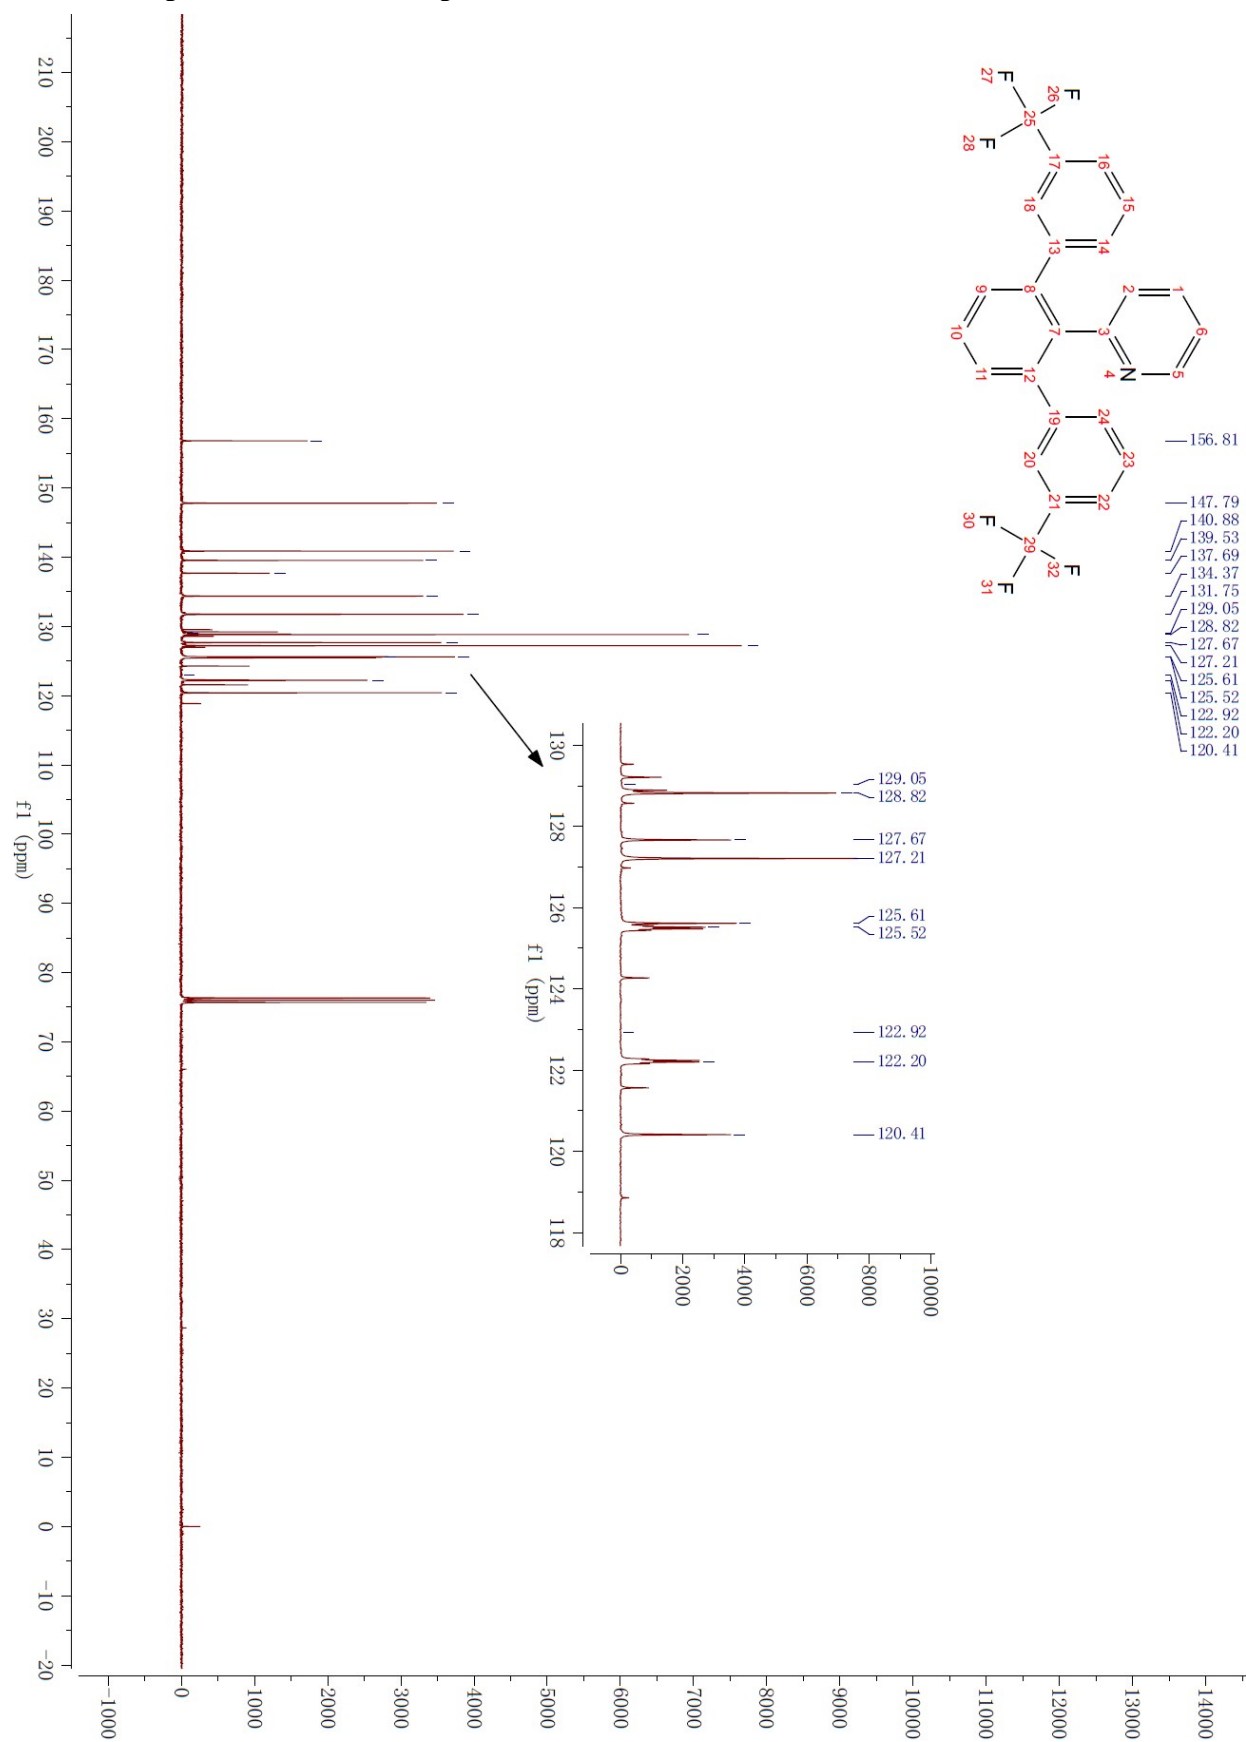

# <sup>1</sup>H NMR Spectrum of the Compound 3ah

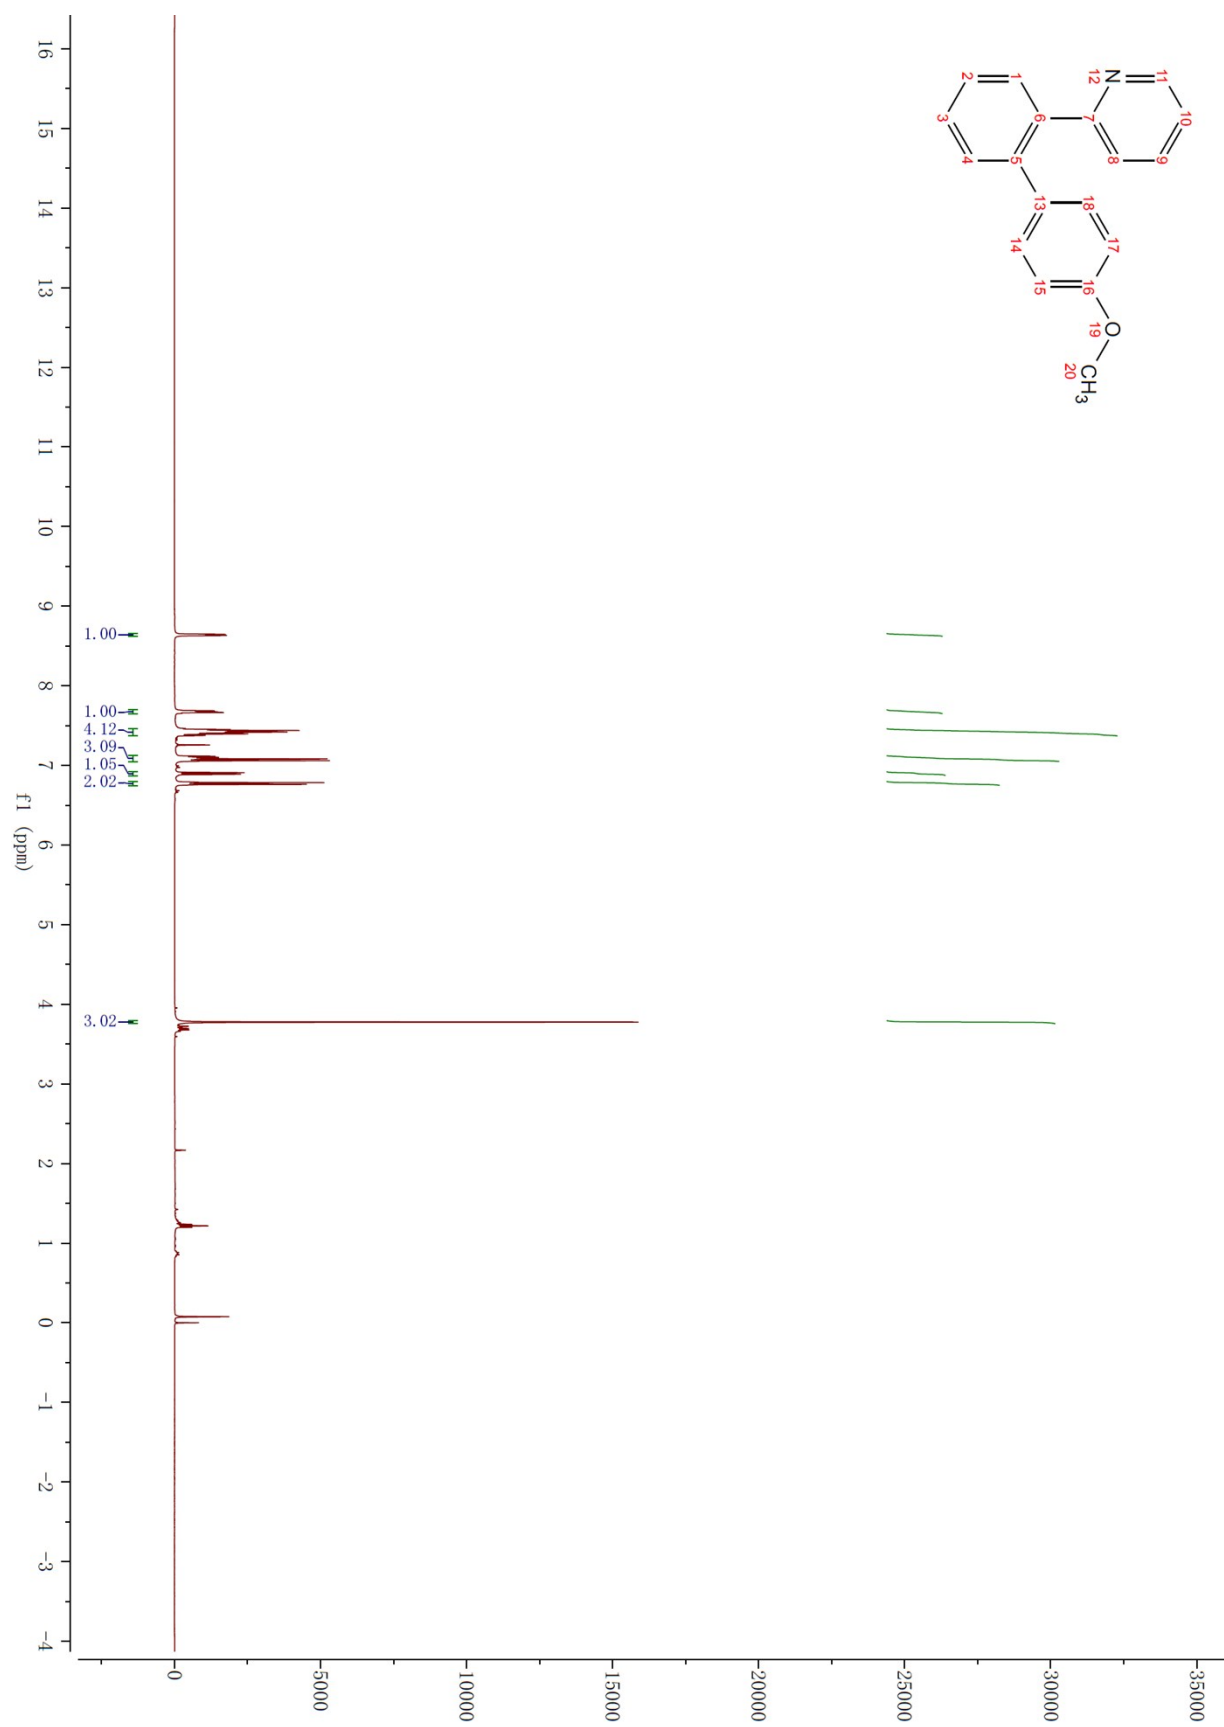

# <sup>13</sup>C NMR Spectrum of the Compound 3ah

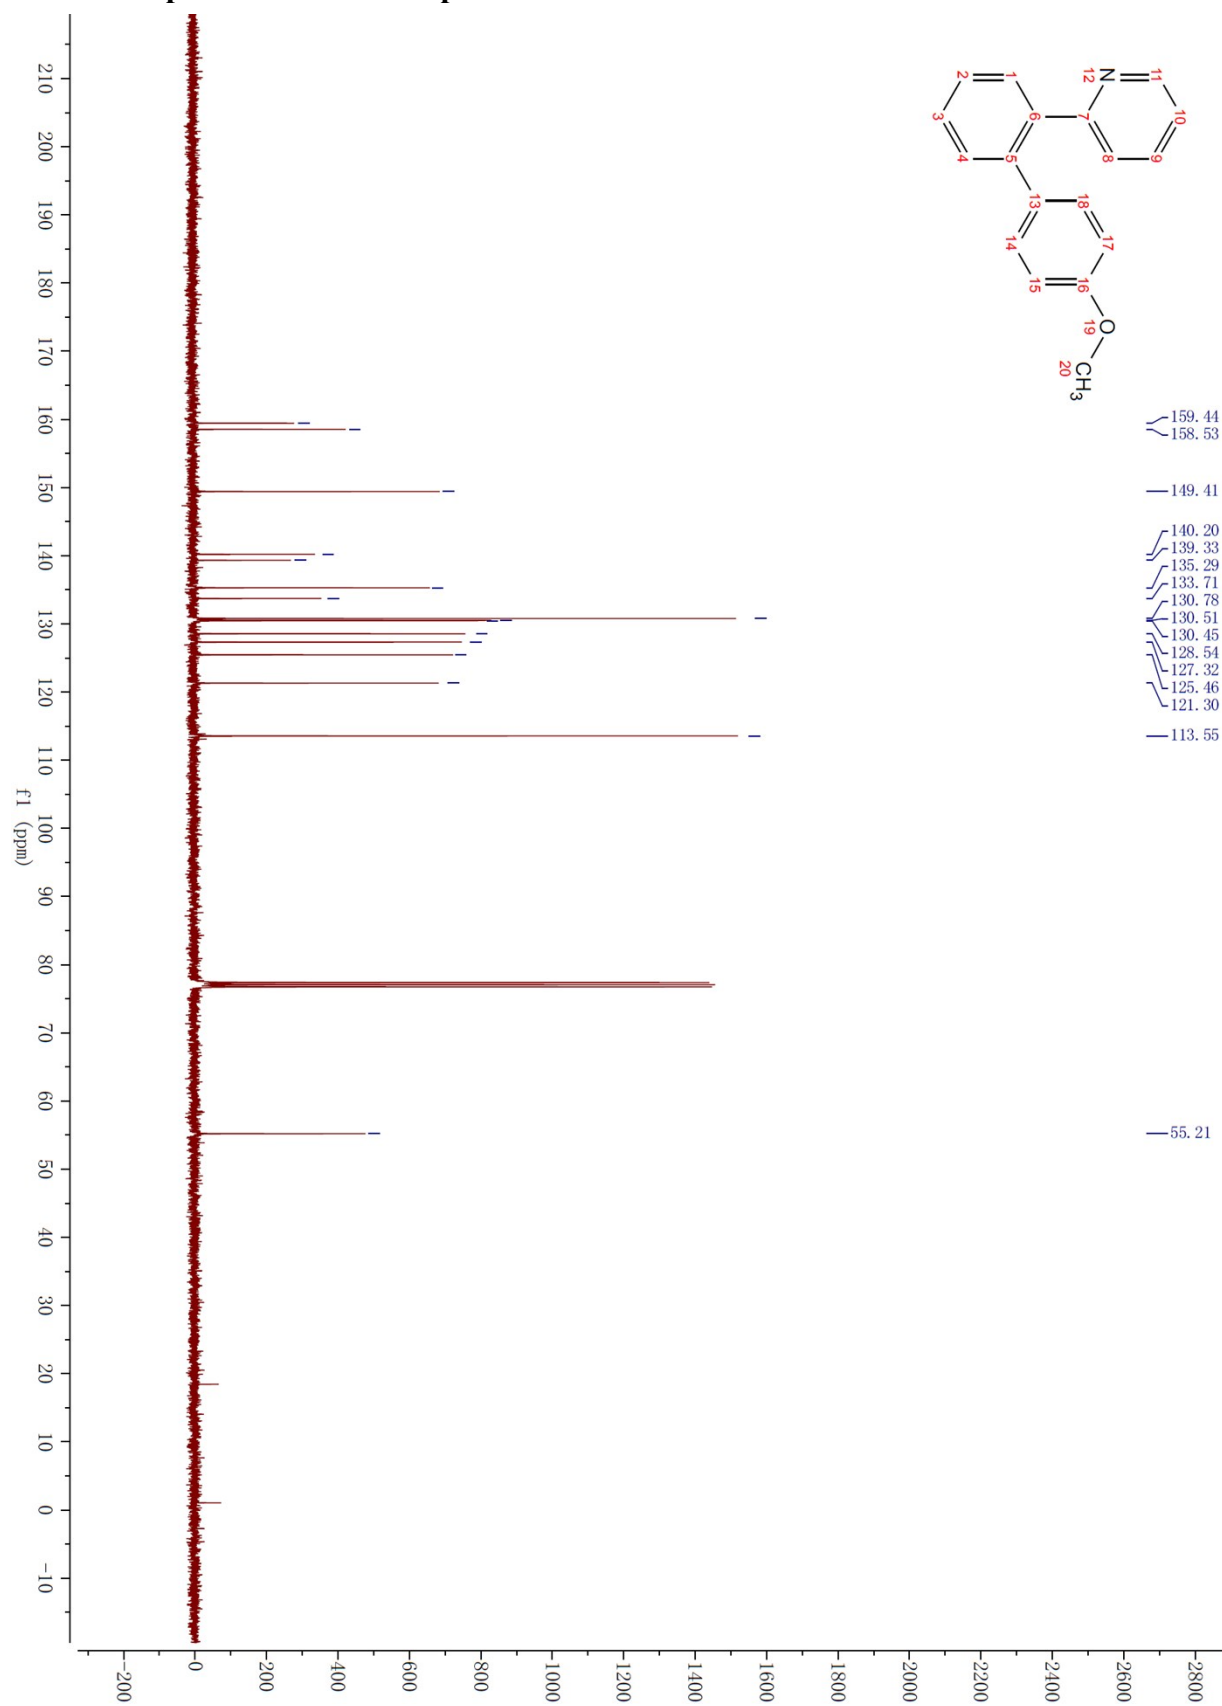

# <sup>1</sup>H NMR Spectrum of the Compound 4ah

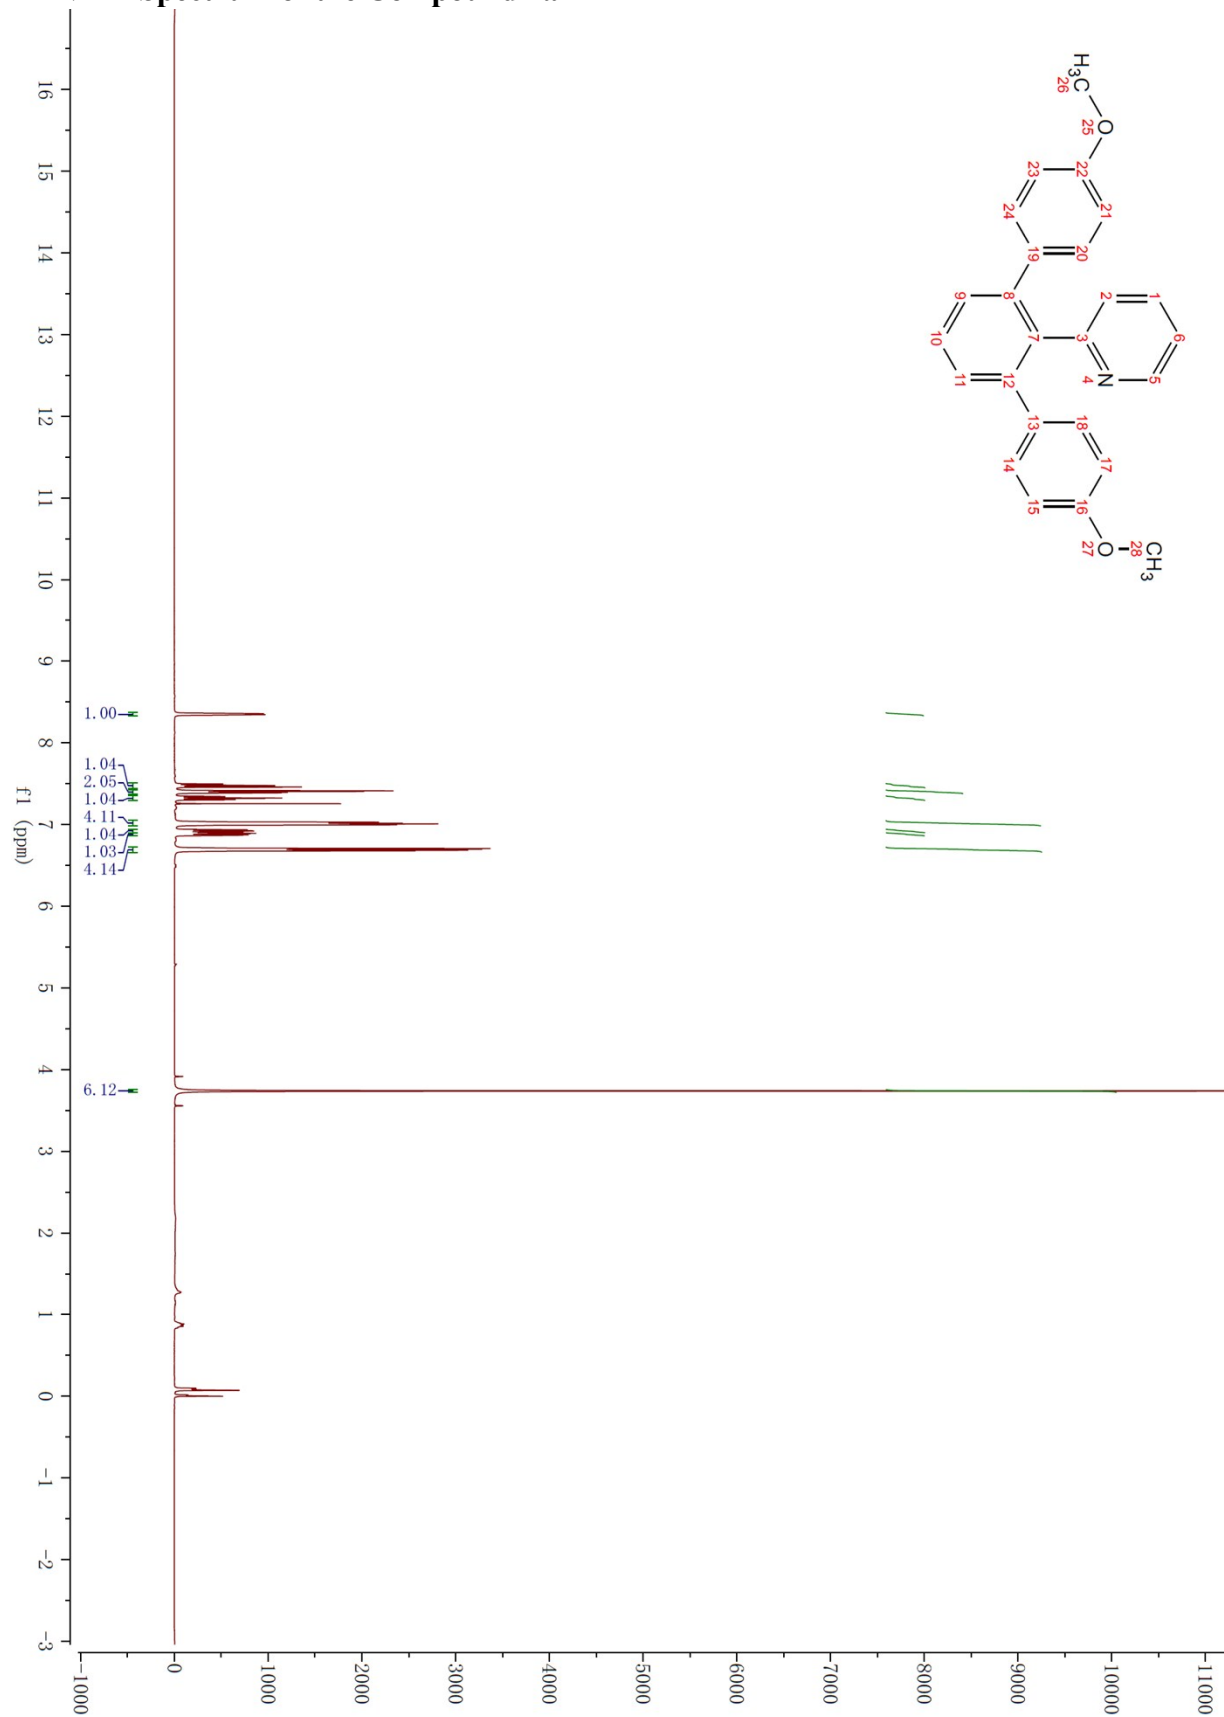



# <sup>13</sup>C NMR Spectrum of the Compound 4ah

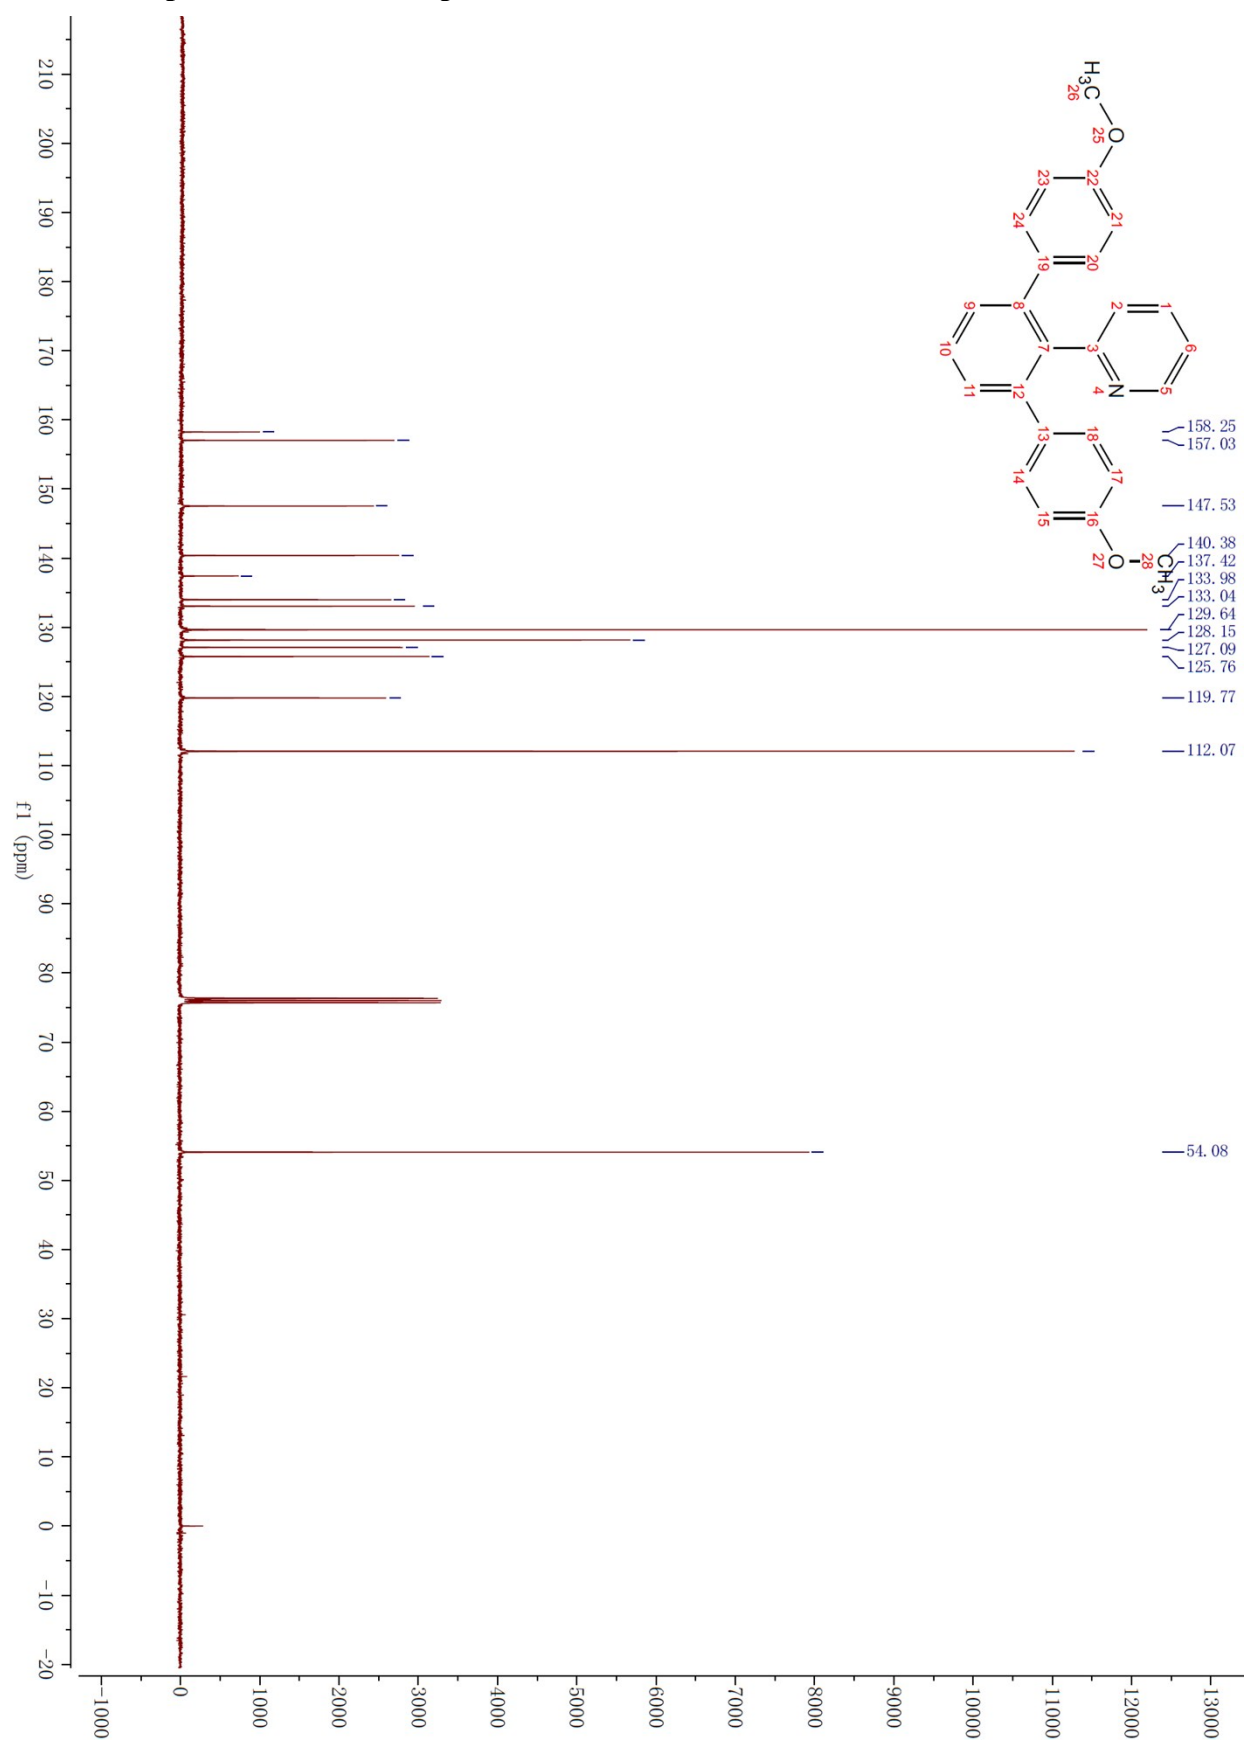

# <sup>1</sup>H NMR Spectrum of the Compound 3aj

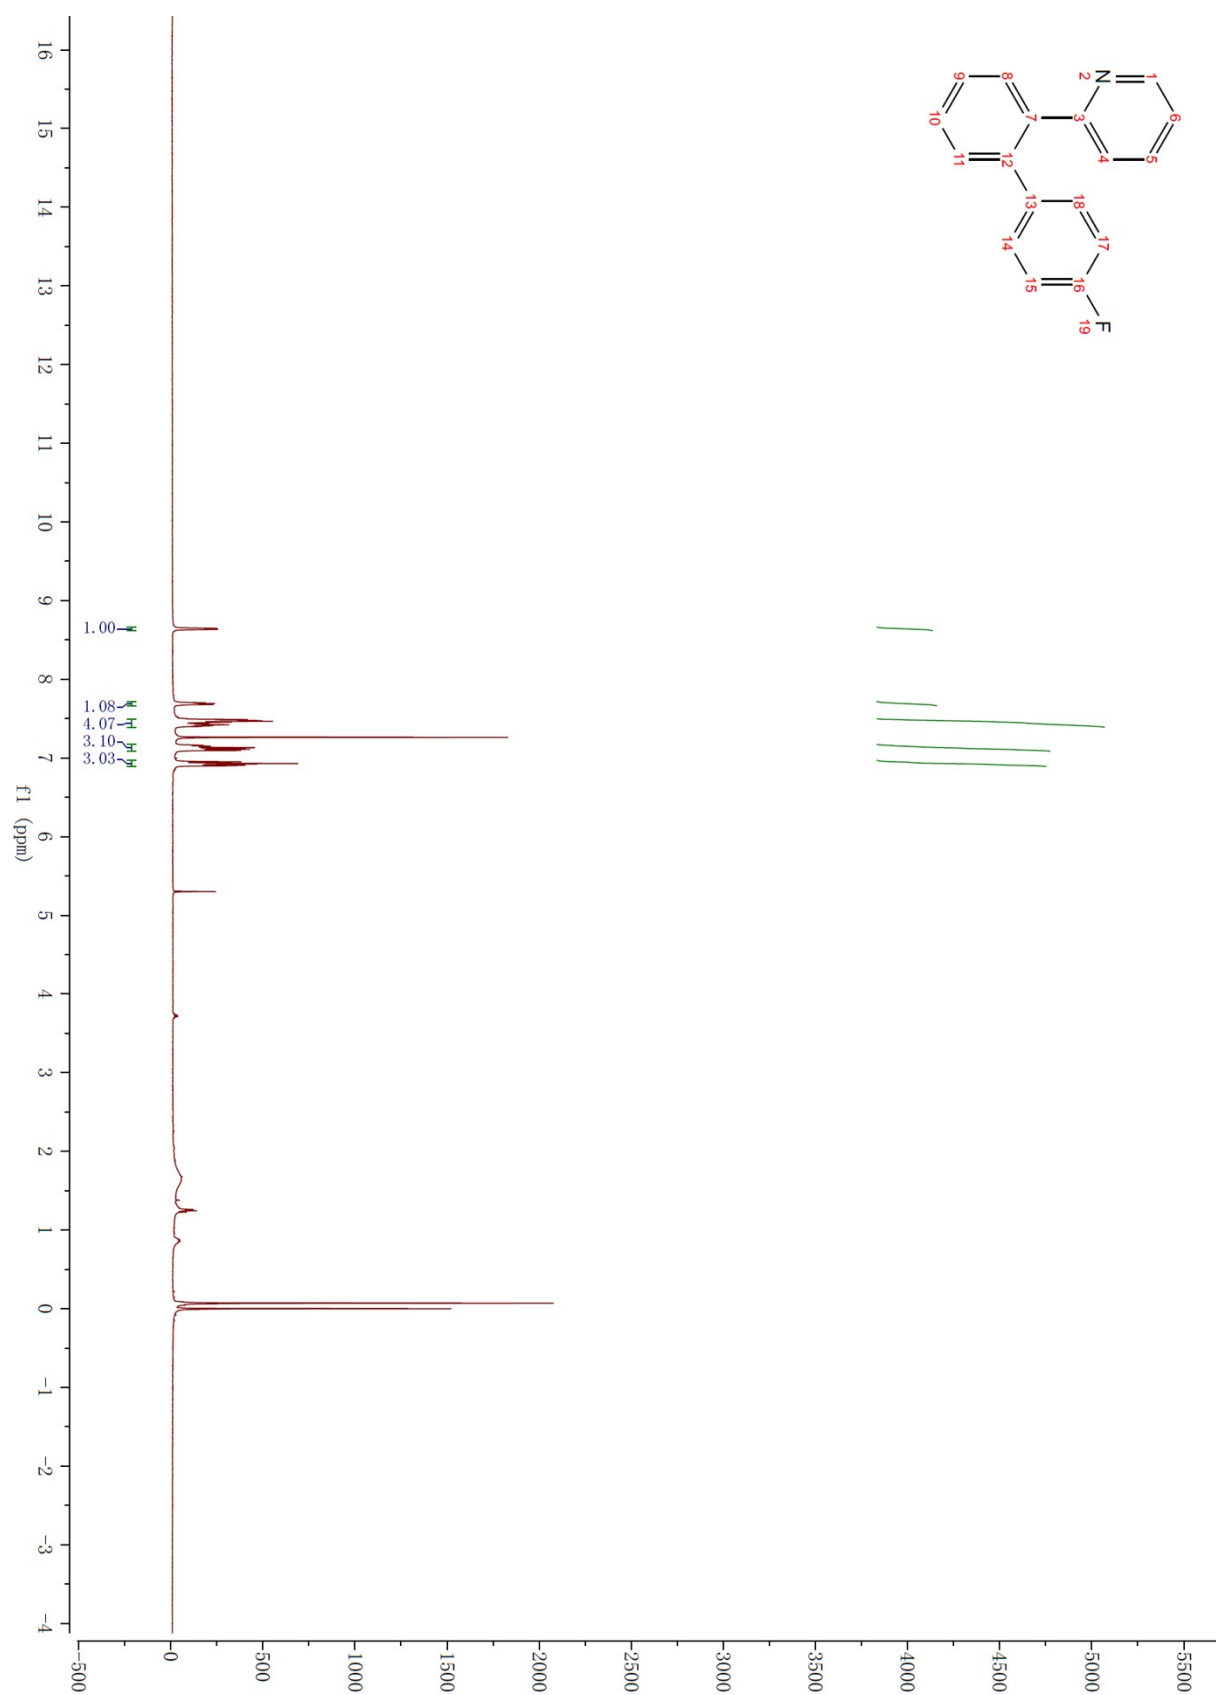

# <sup>13</sup>C NMR Spectrum of the Compound 3aj

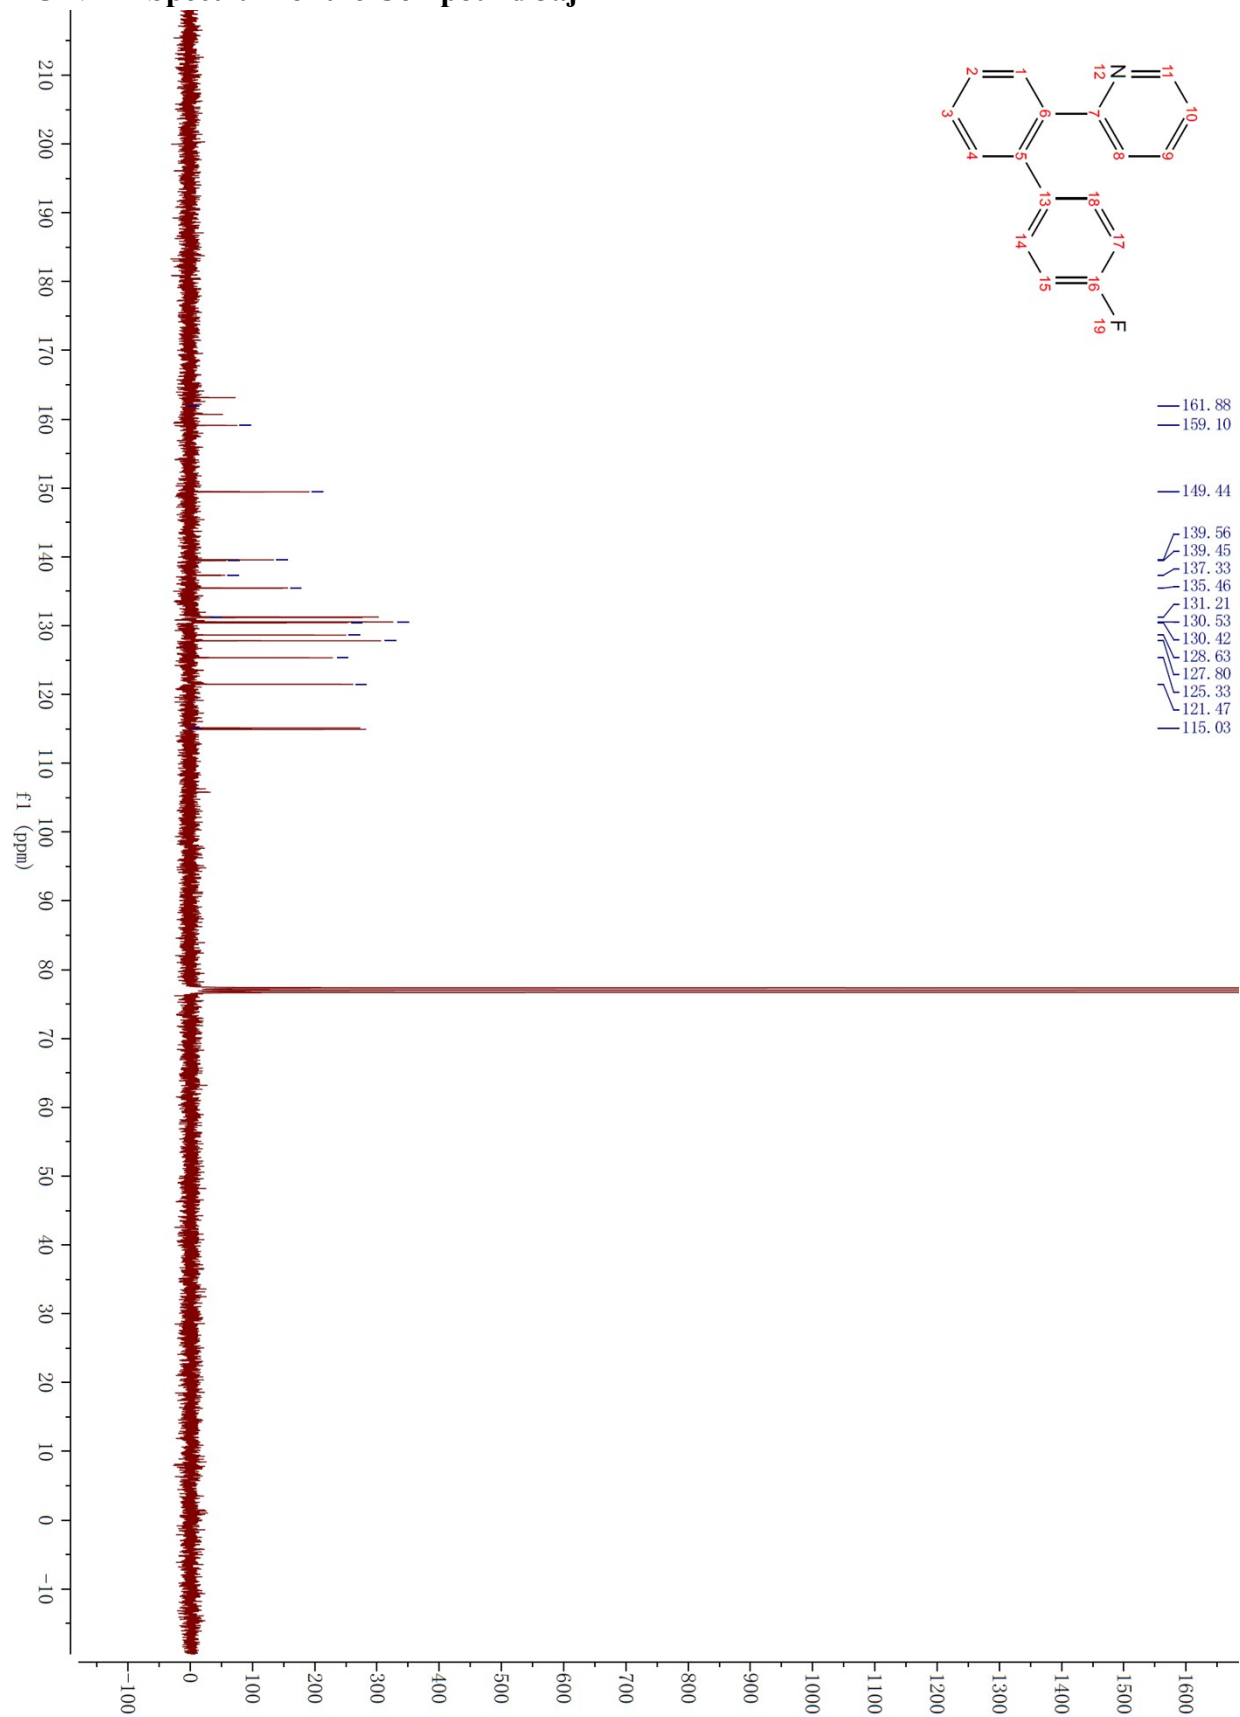

# <sup>1</sup>H NMR Spectrum of the Compound 4aj

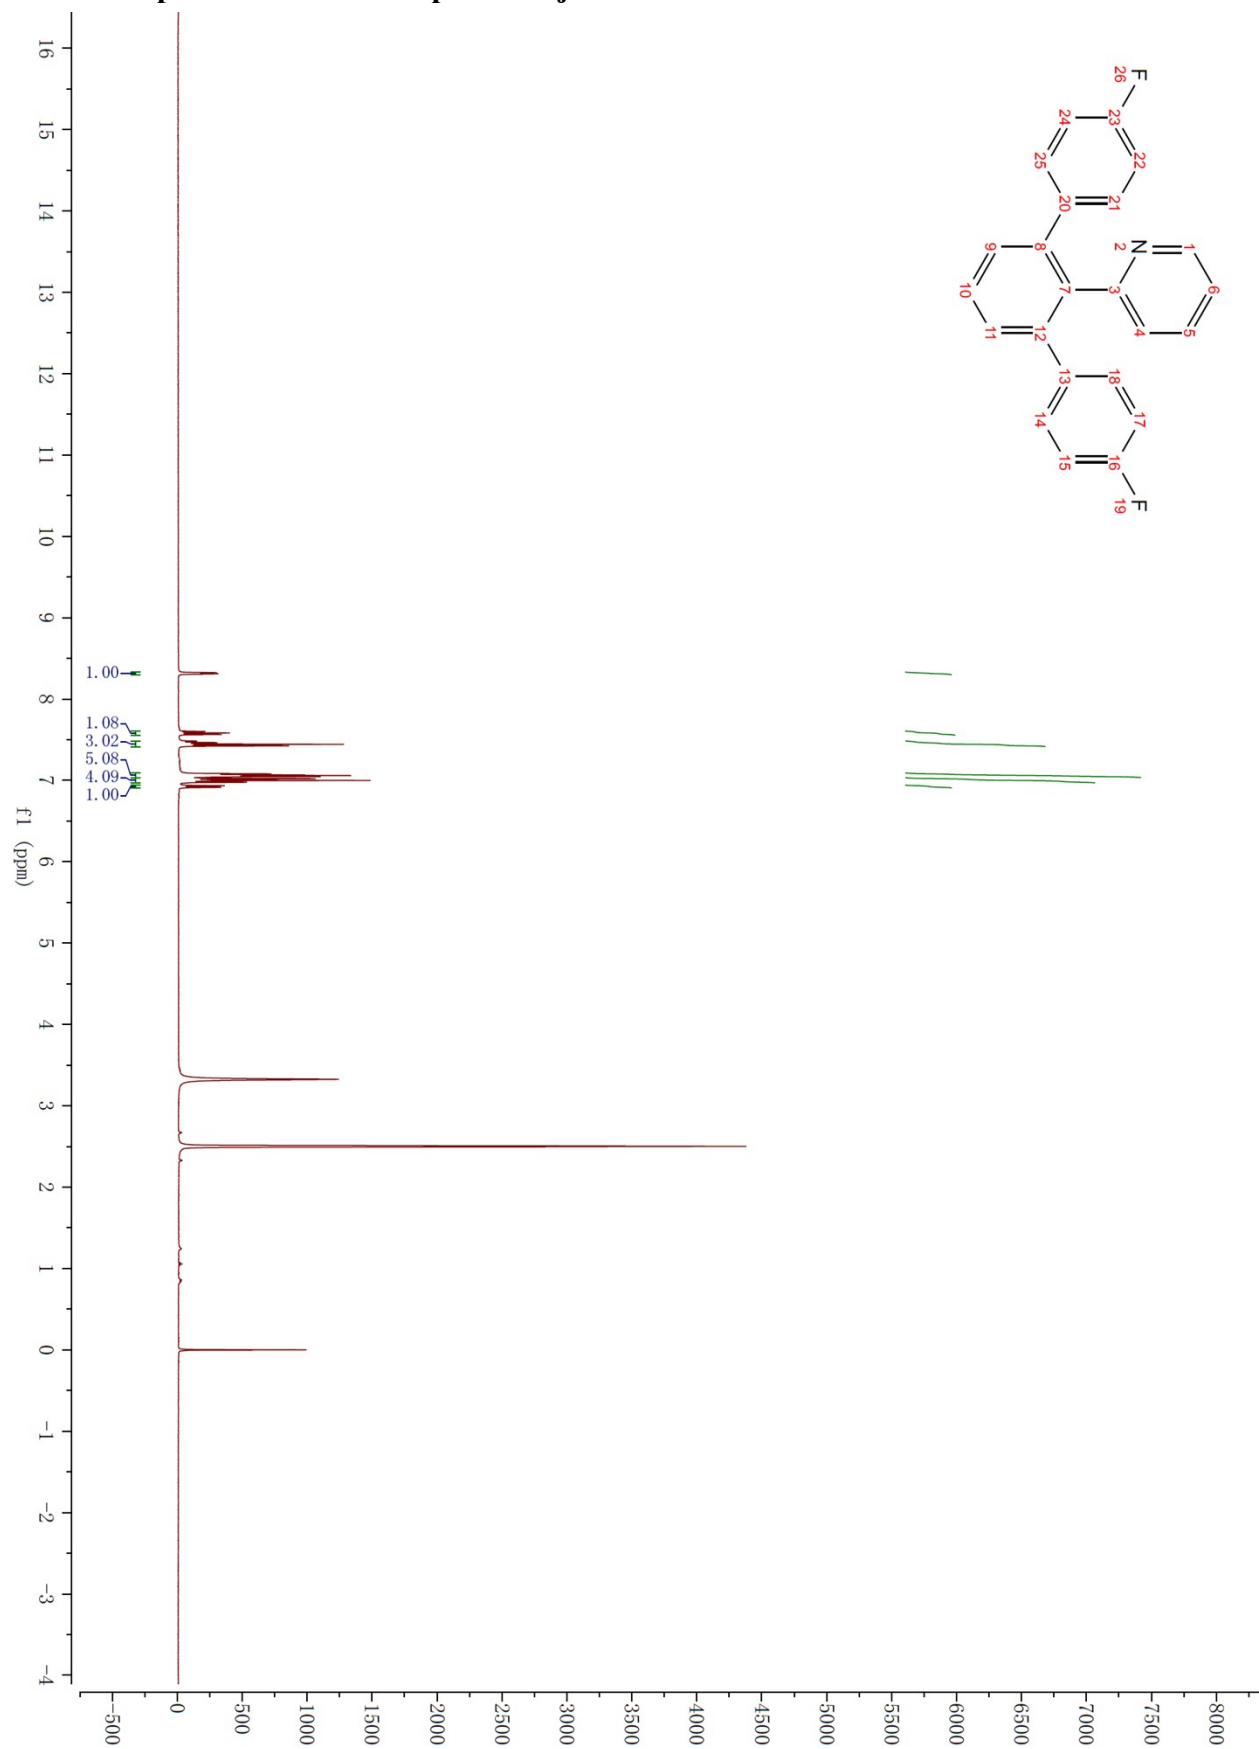

# <sup>13</sup>C NMR Spectrum of the Compound 4aj

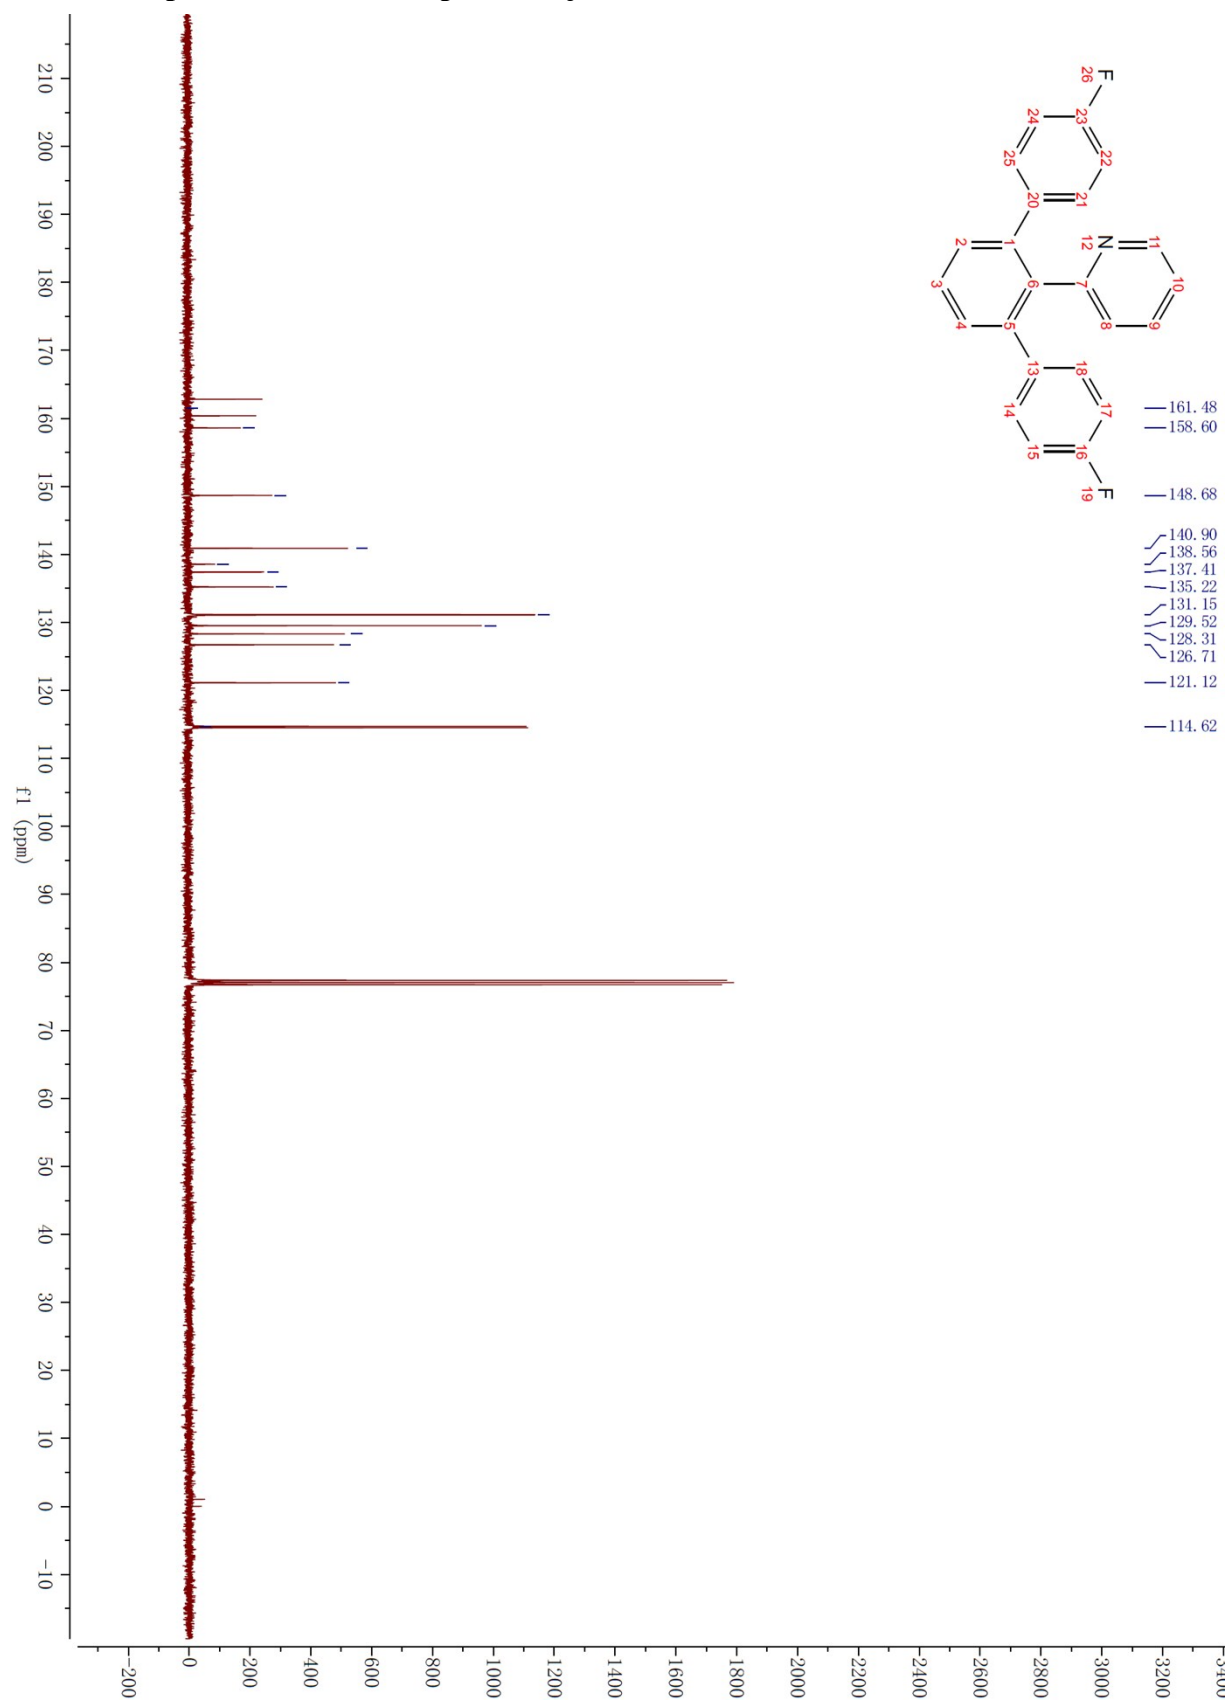

# <sup>1</sup>H NMR Spectrum of the Compound 3ae

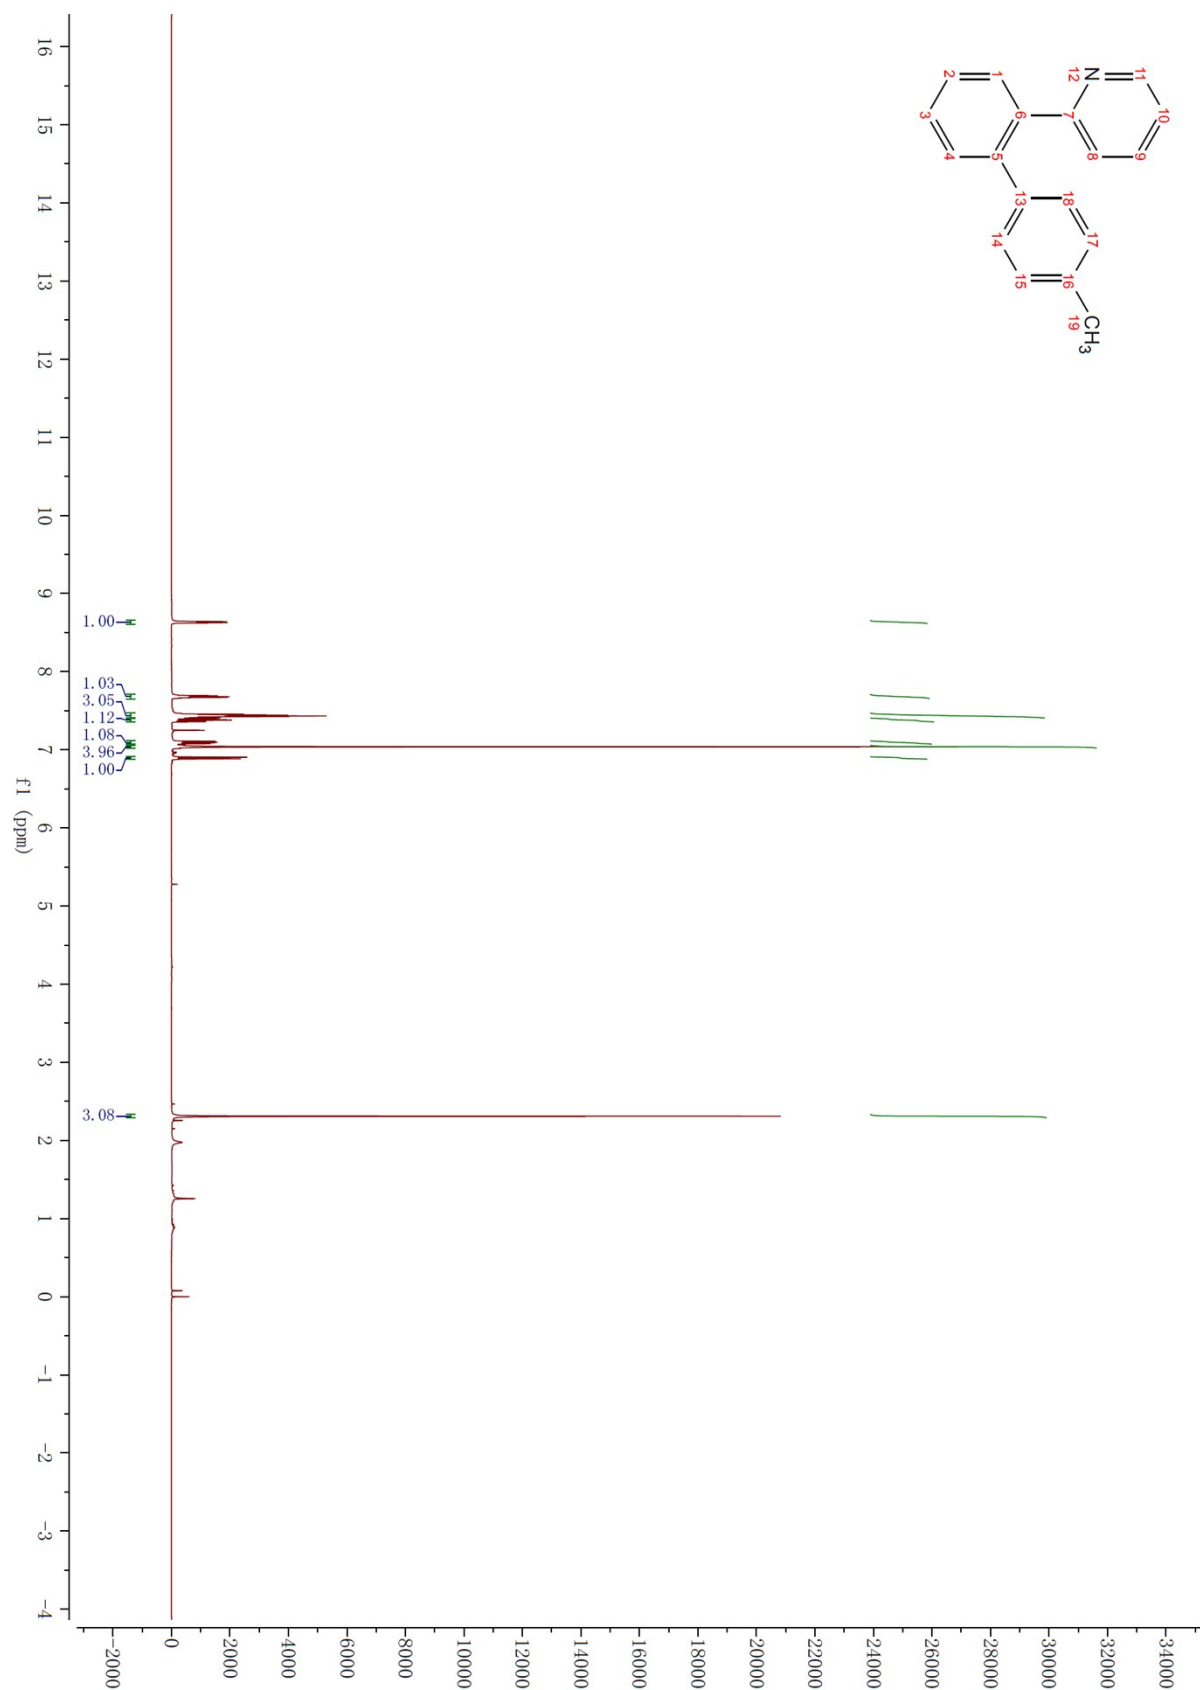

# <sup>13</sup>C NMR Spectrum of the Compound 3ae

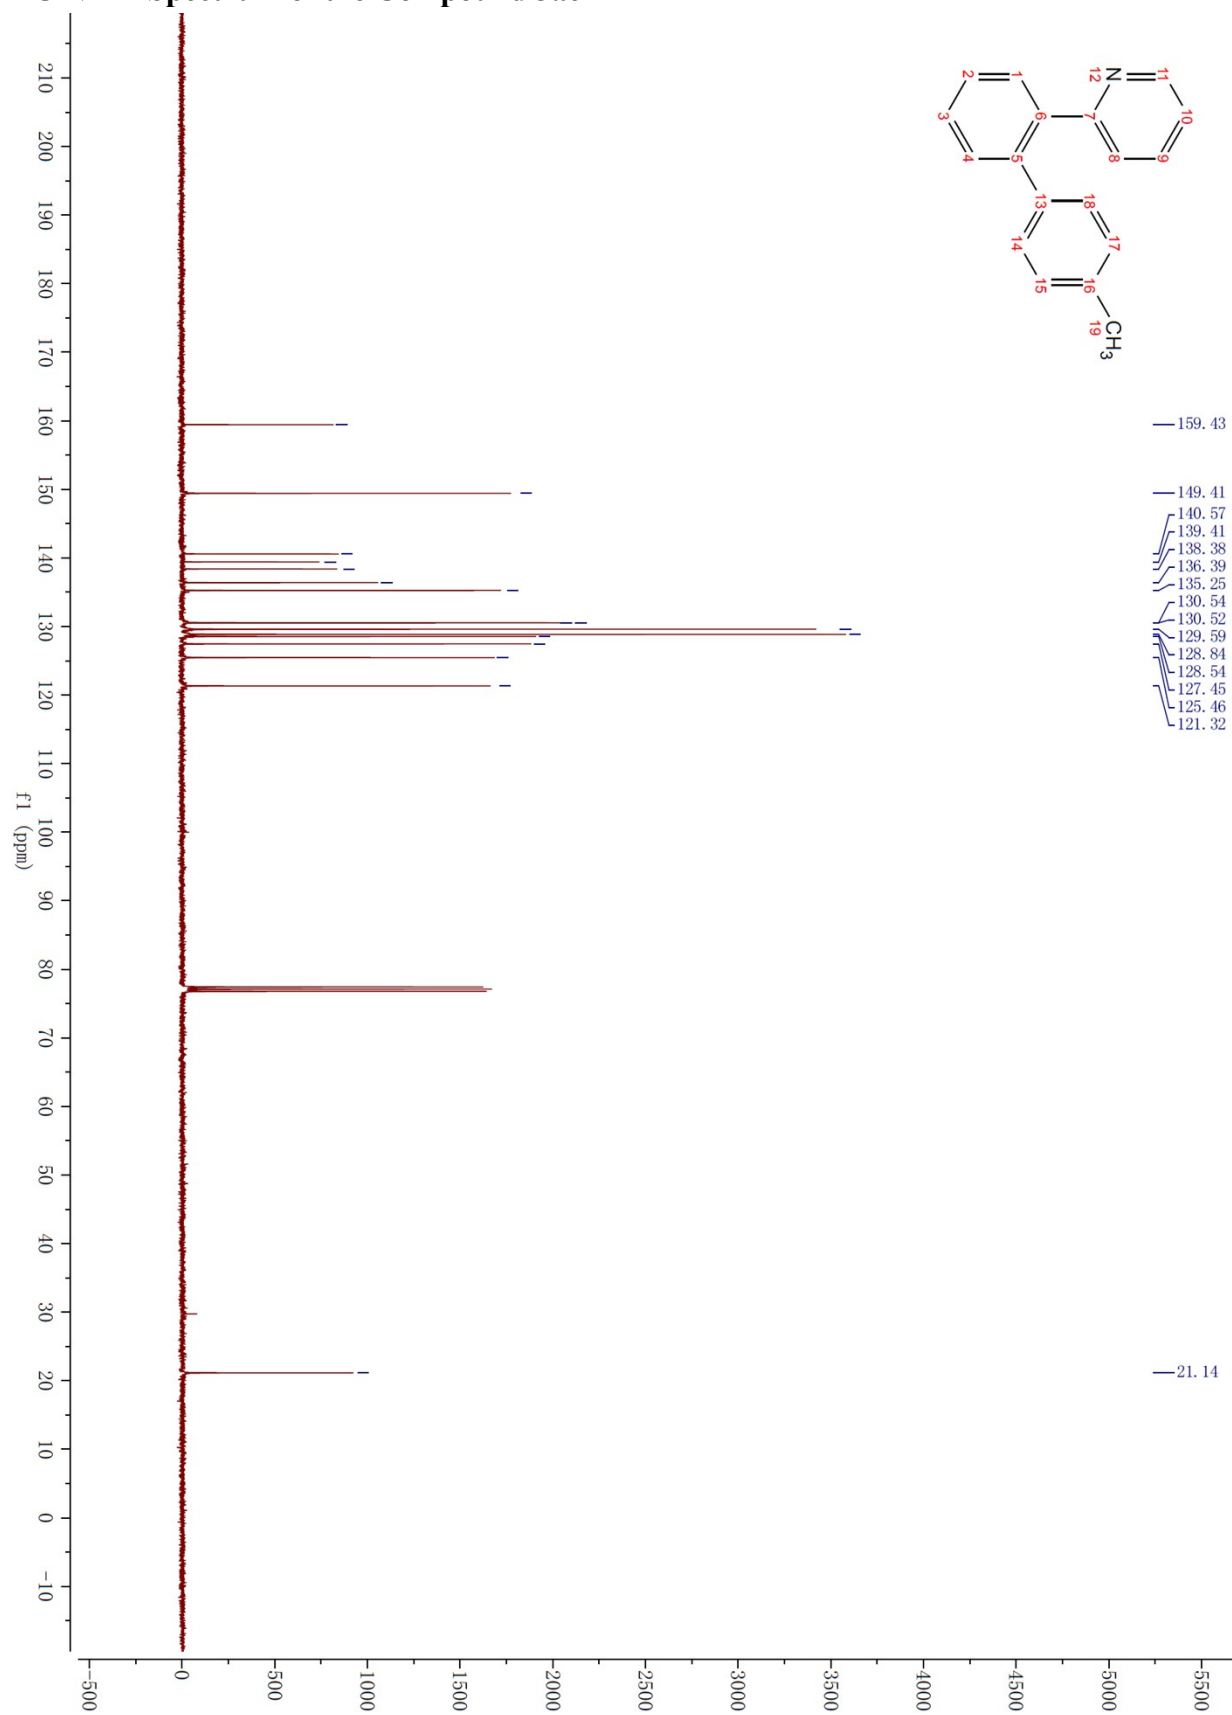

# <sup>1</sup>H NMR Spectrum of the Compound 4ae

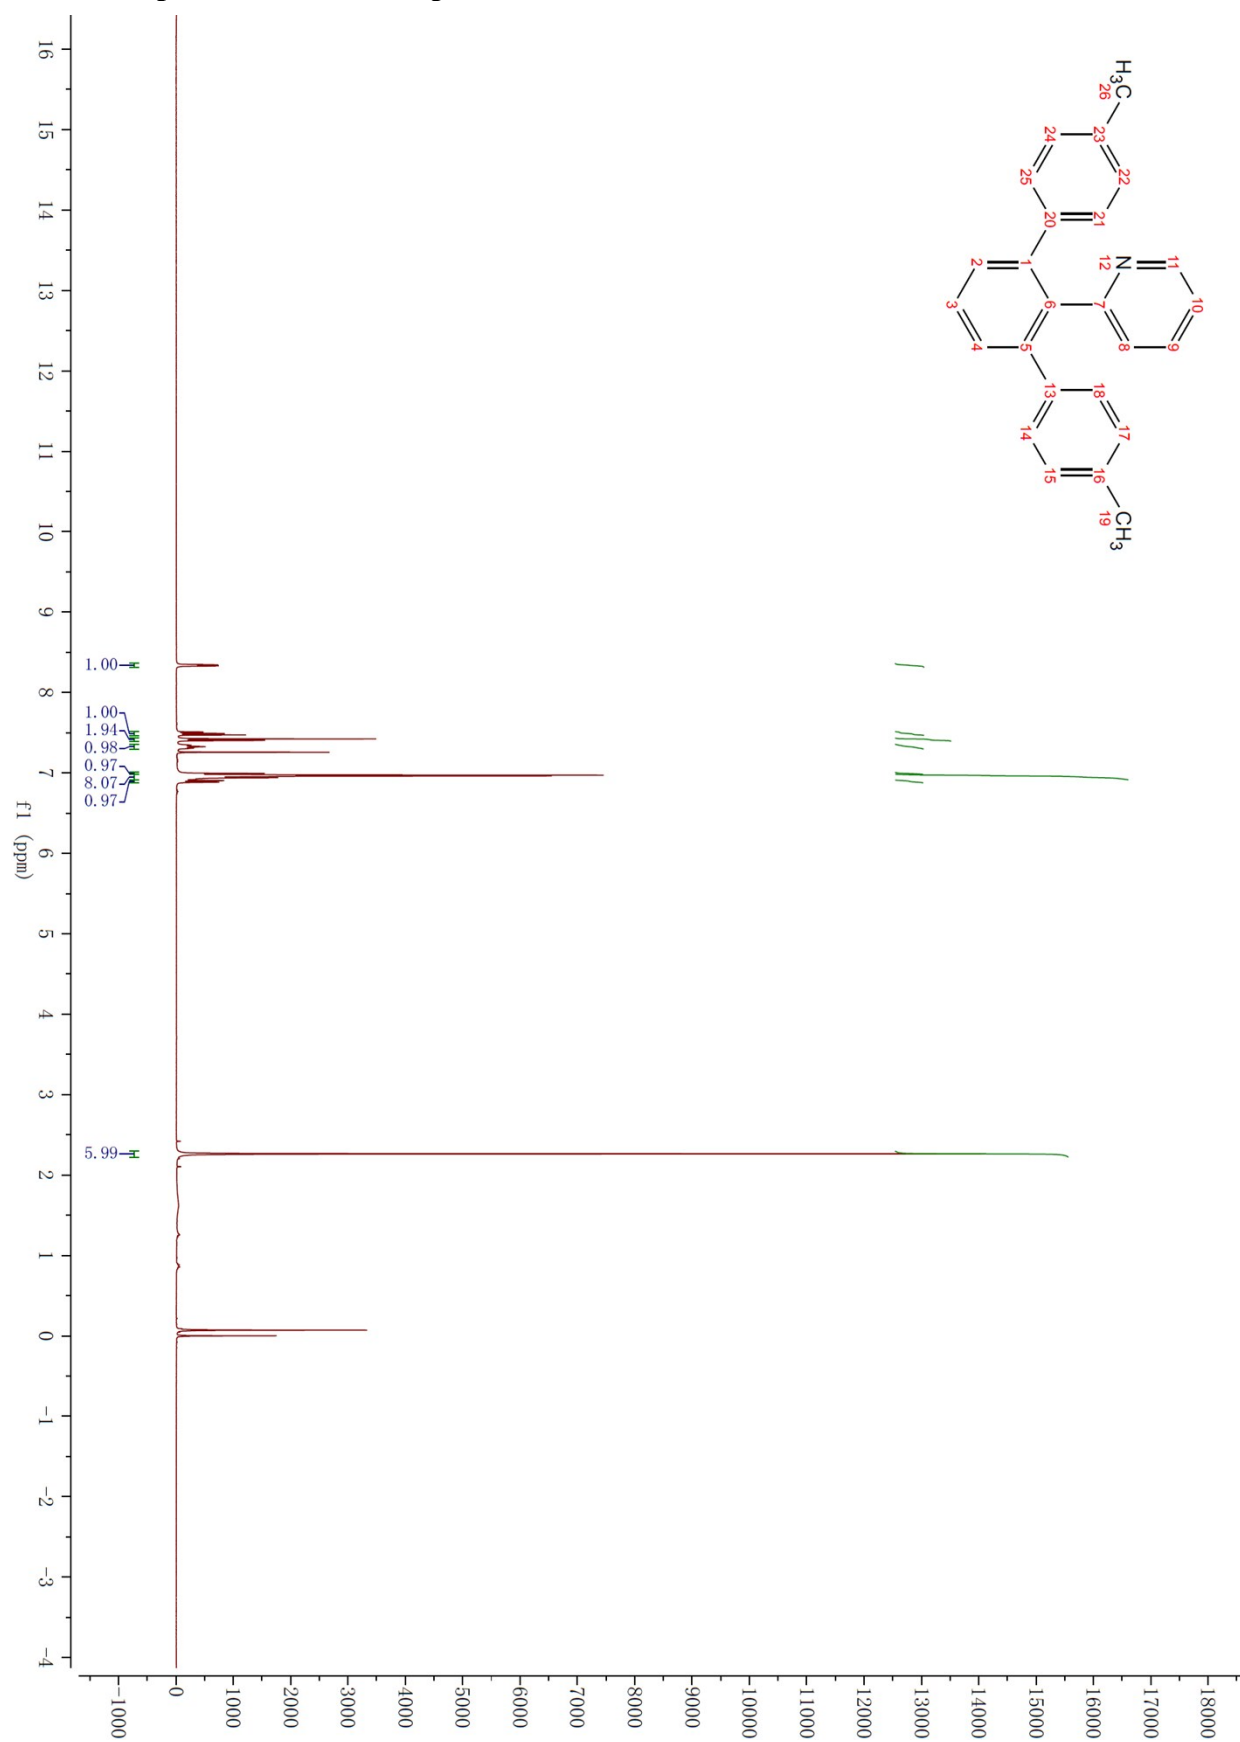



# <sup>13</sup>C NMR Spectrum of the Compound 4ae

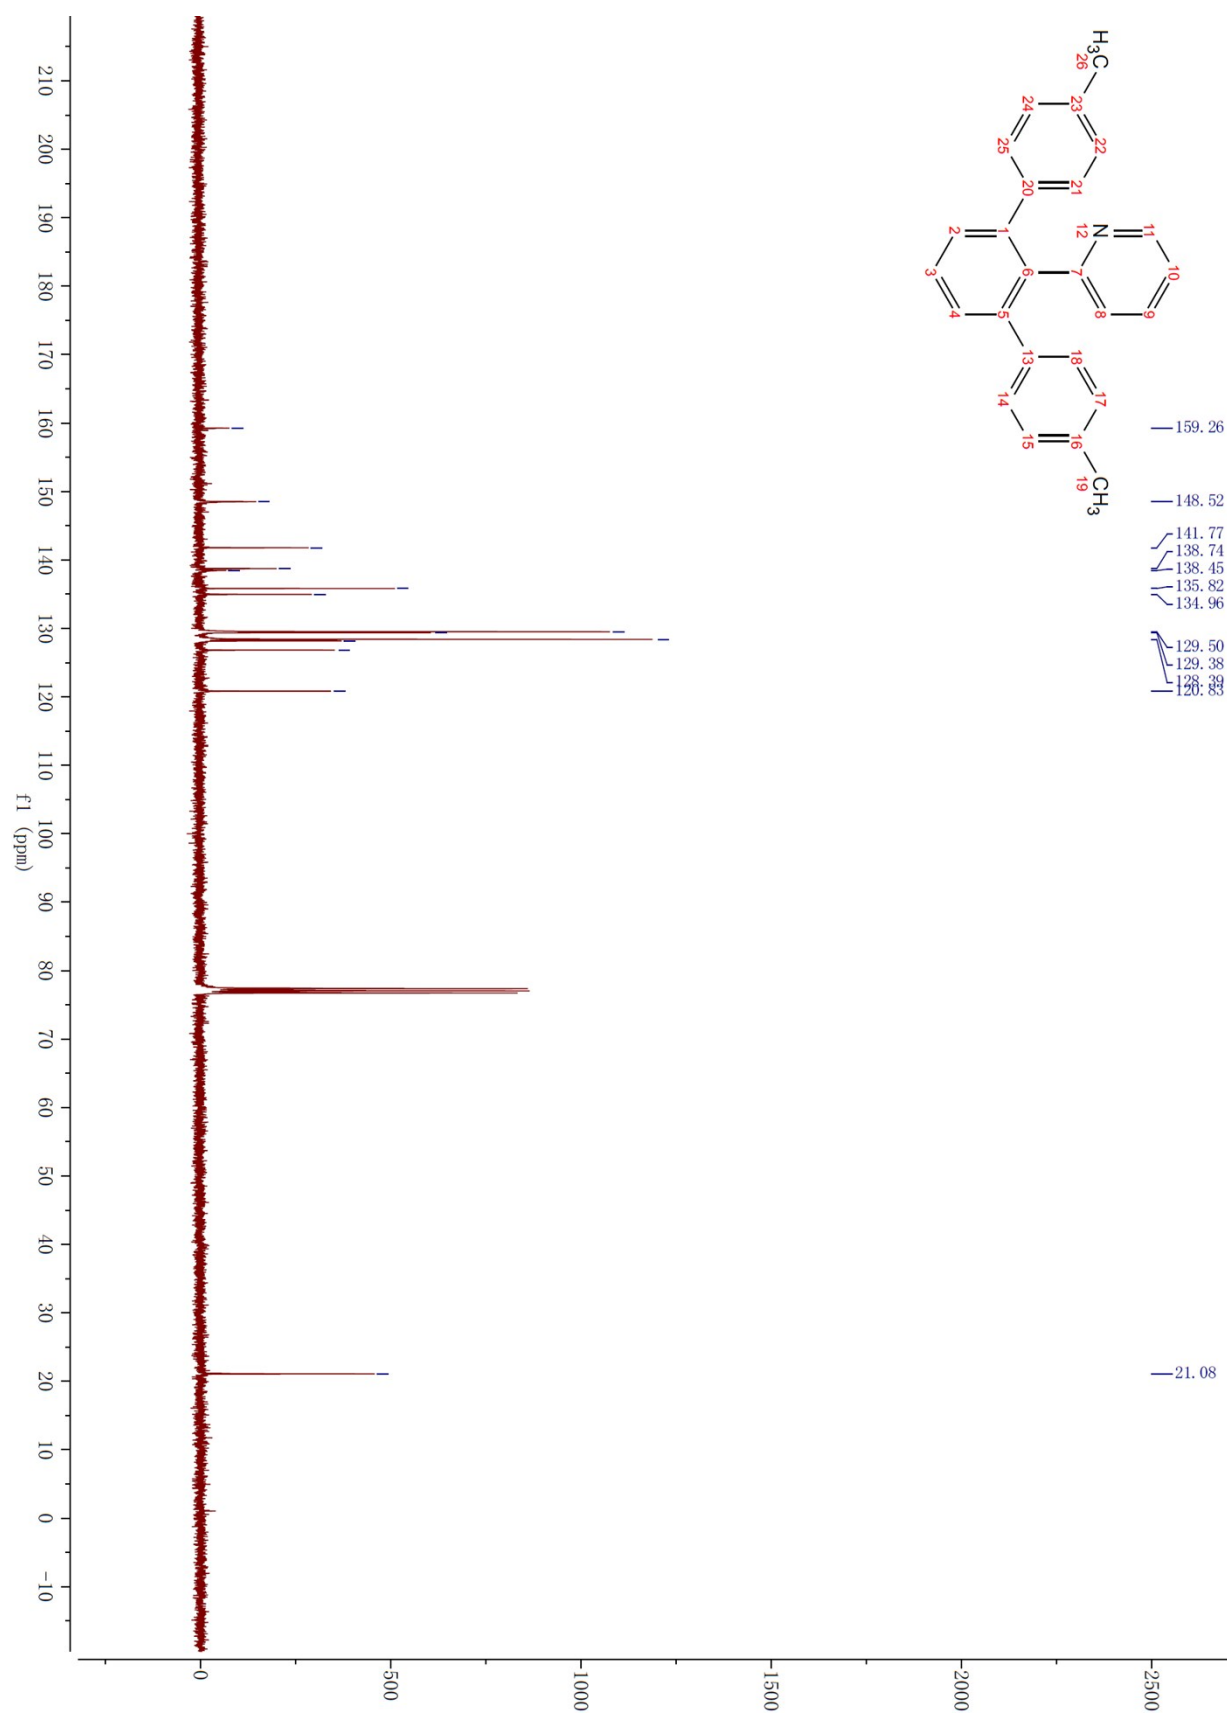

# <sup>1</sup>H NMR Spectrum of the Compound 3am

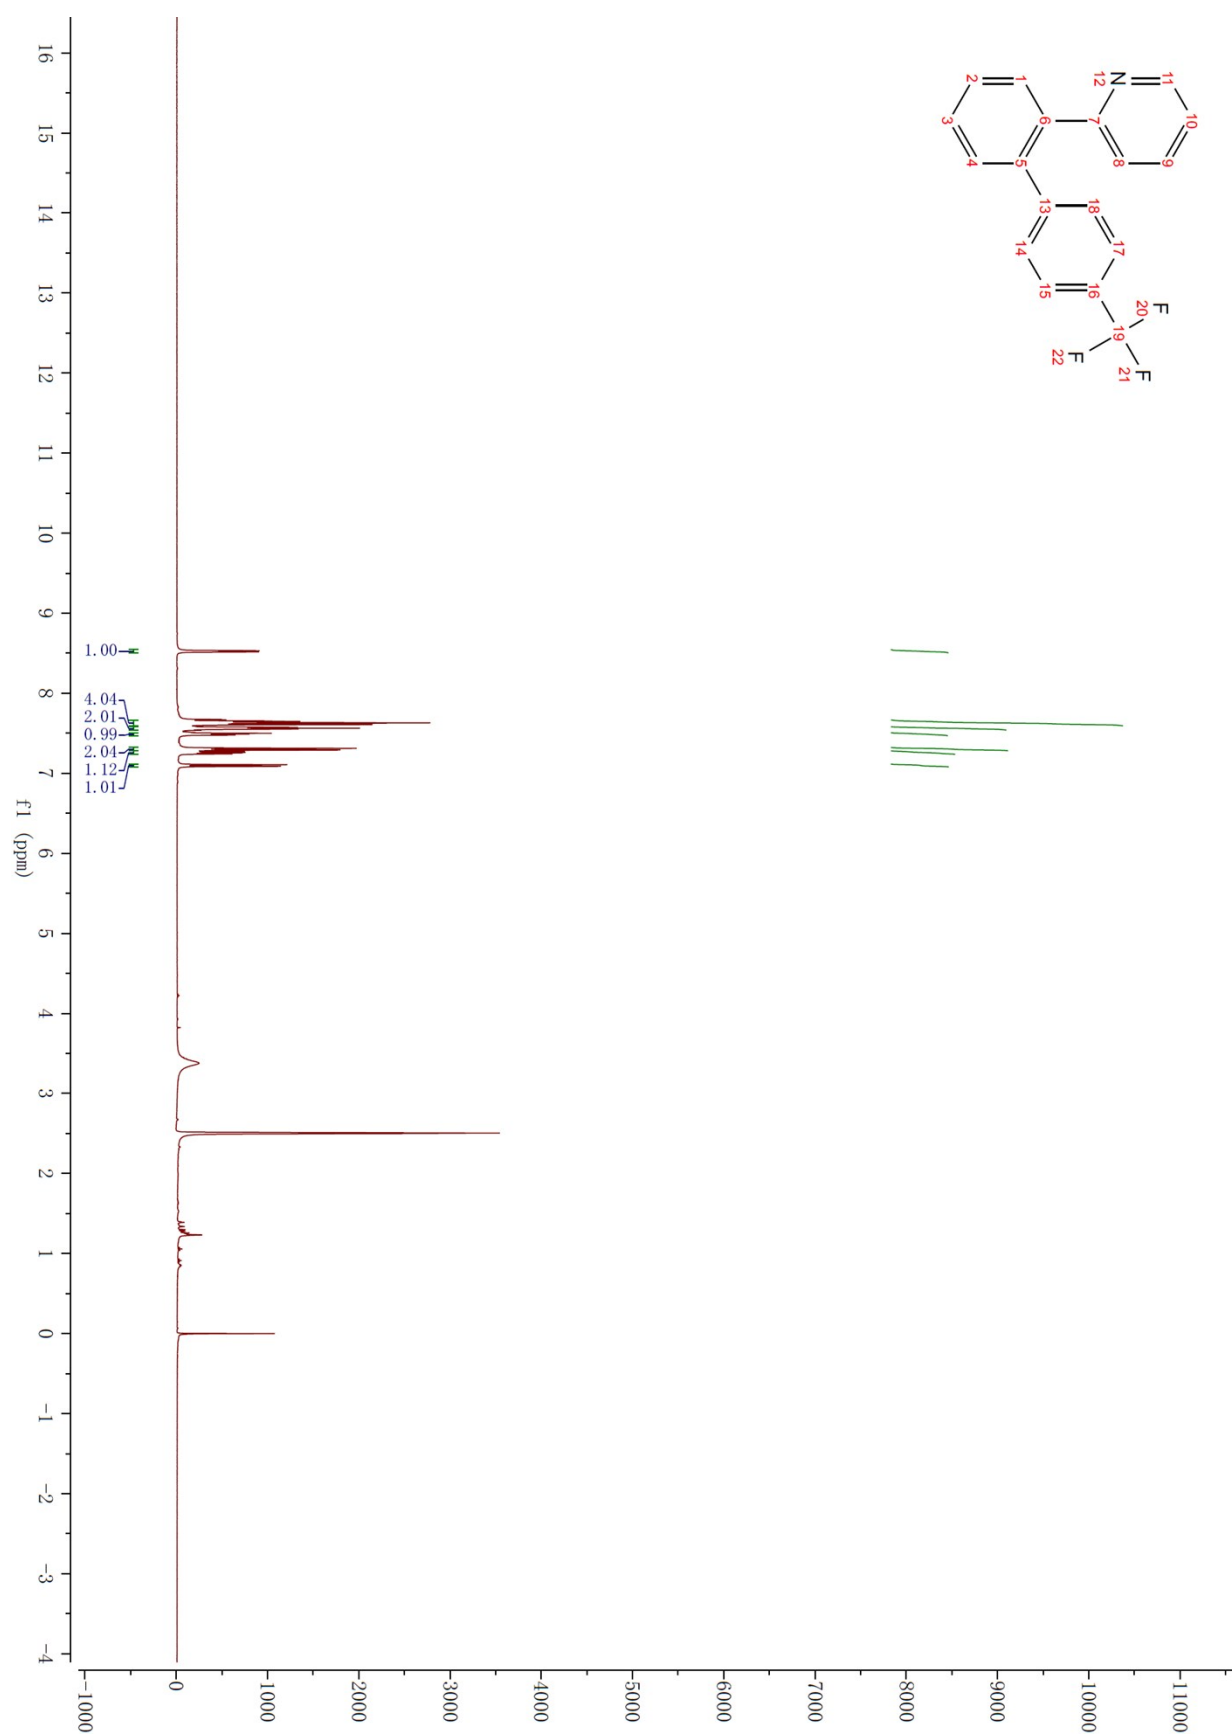

# <sup>13</sup>C NMR Spectrum of the Compound 3am

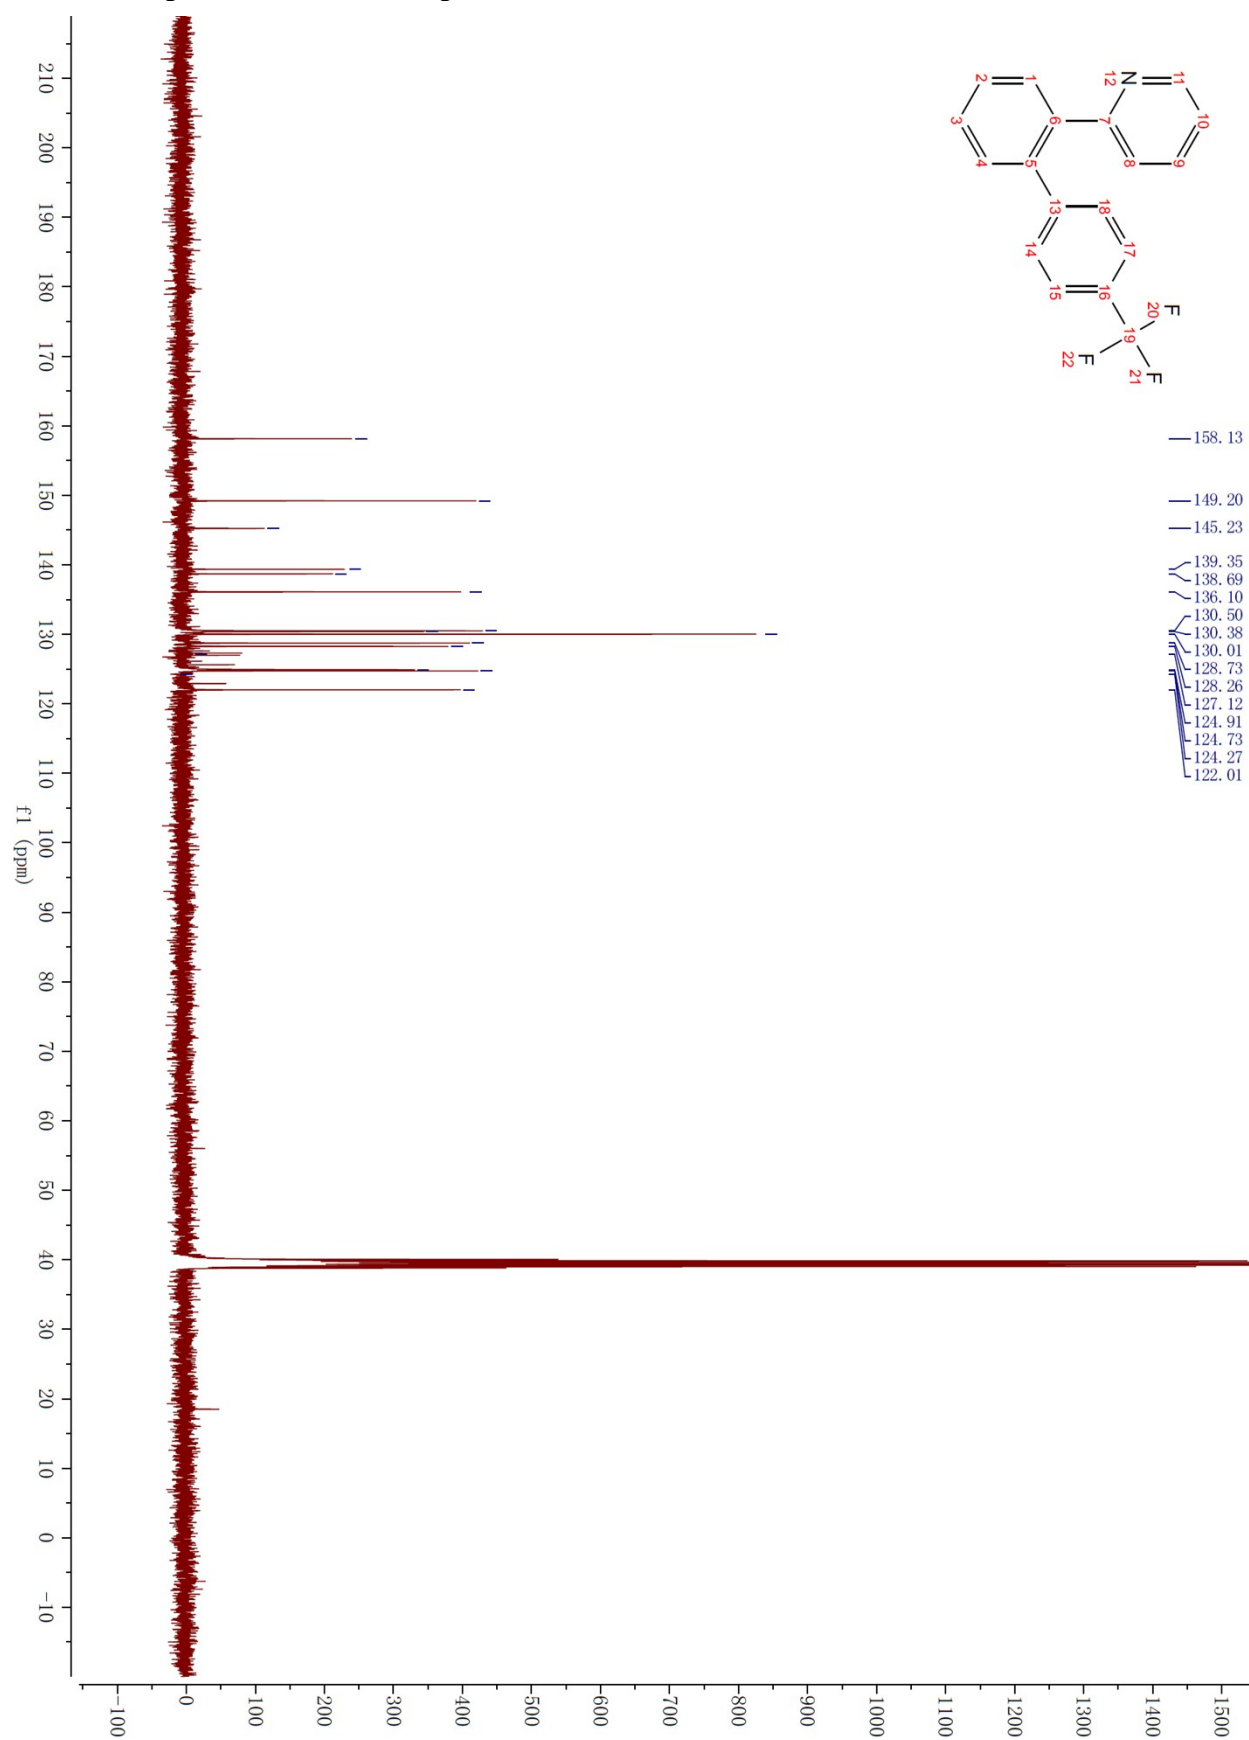

# <sup>1</sup>H NMR Spectrum of the Compound 4am

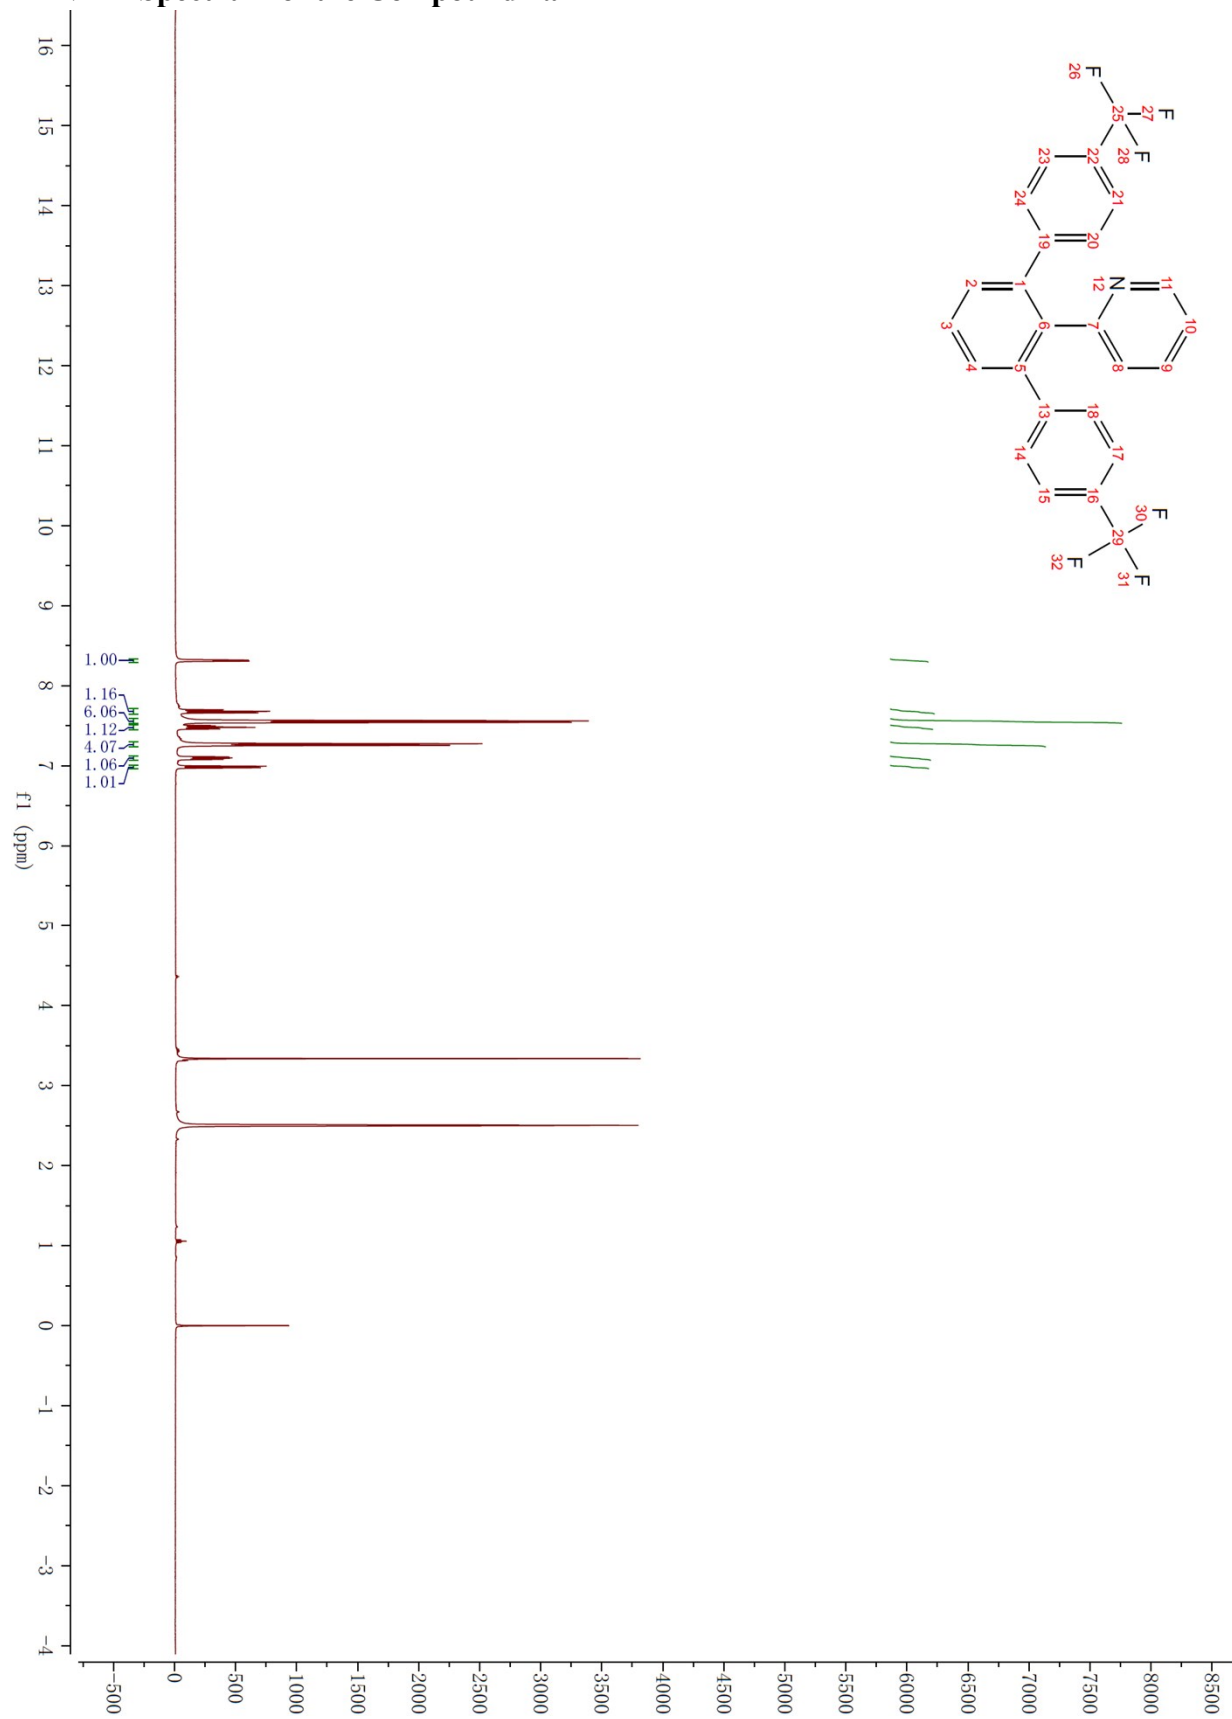

# <sup>13</sup>C NMR Spectrum of the Compound 4am

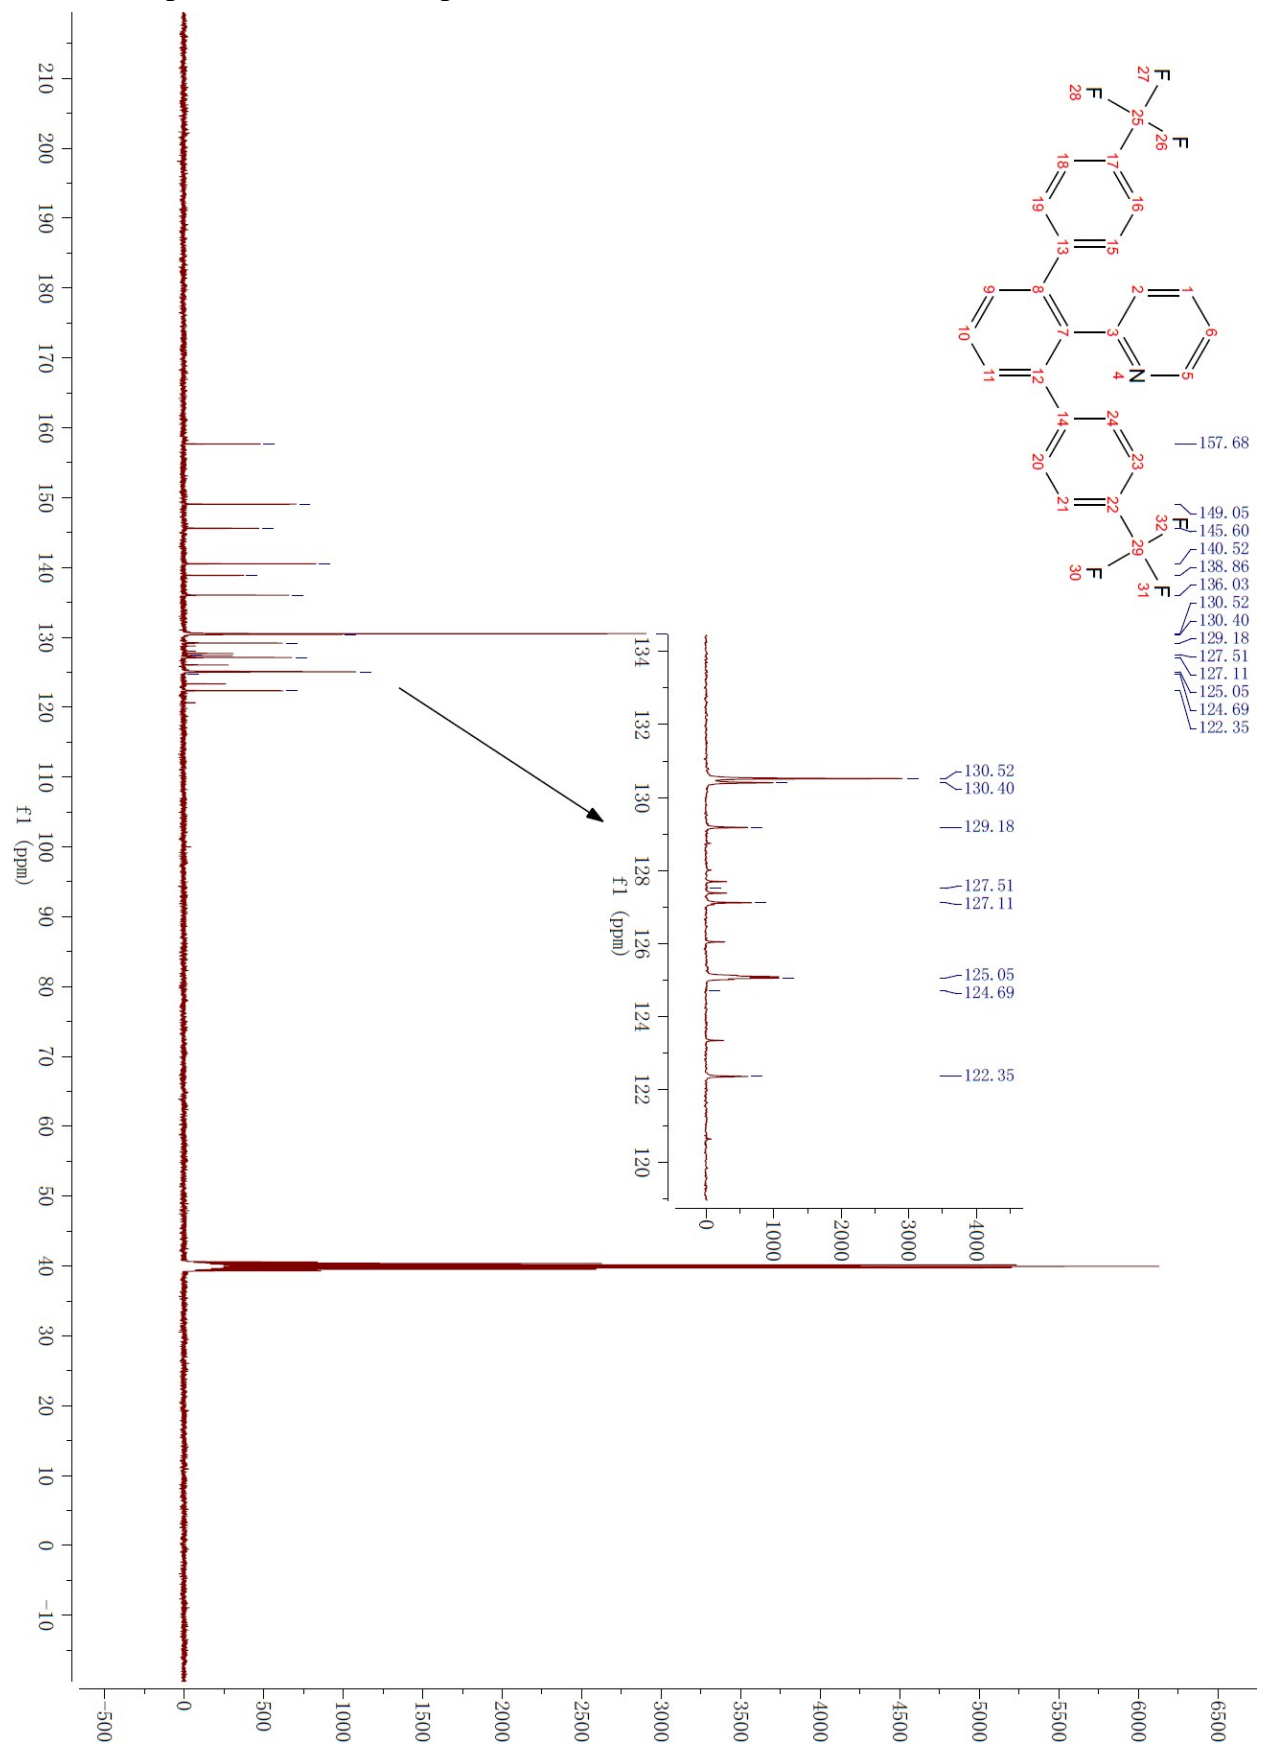

# <sup>1</sup>H NMR Spectrum of the Compound 3bm

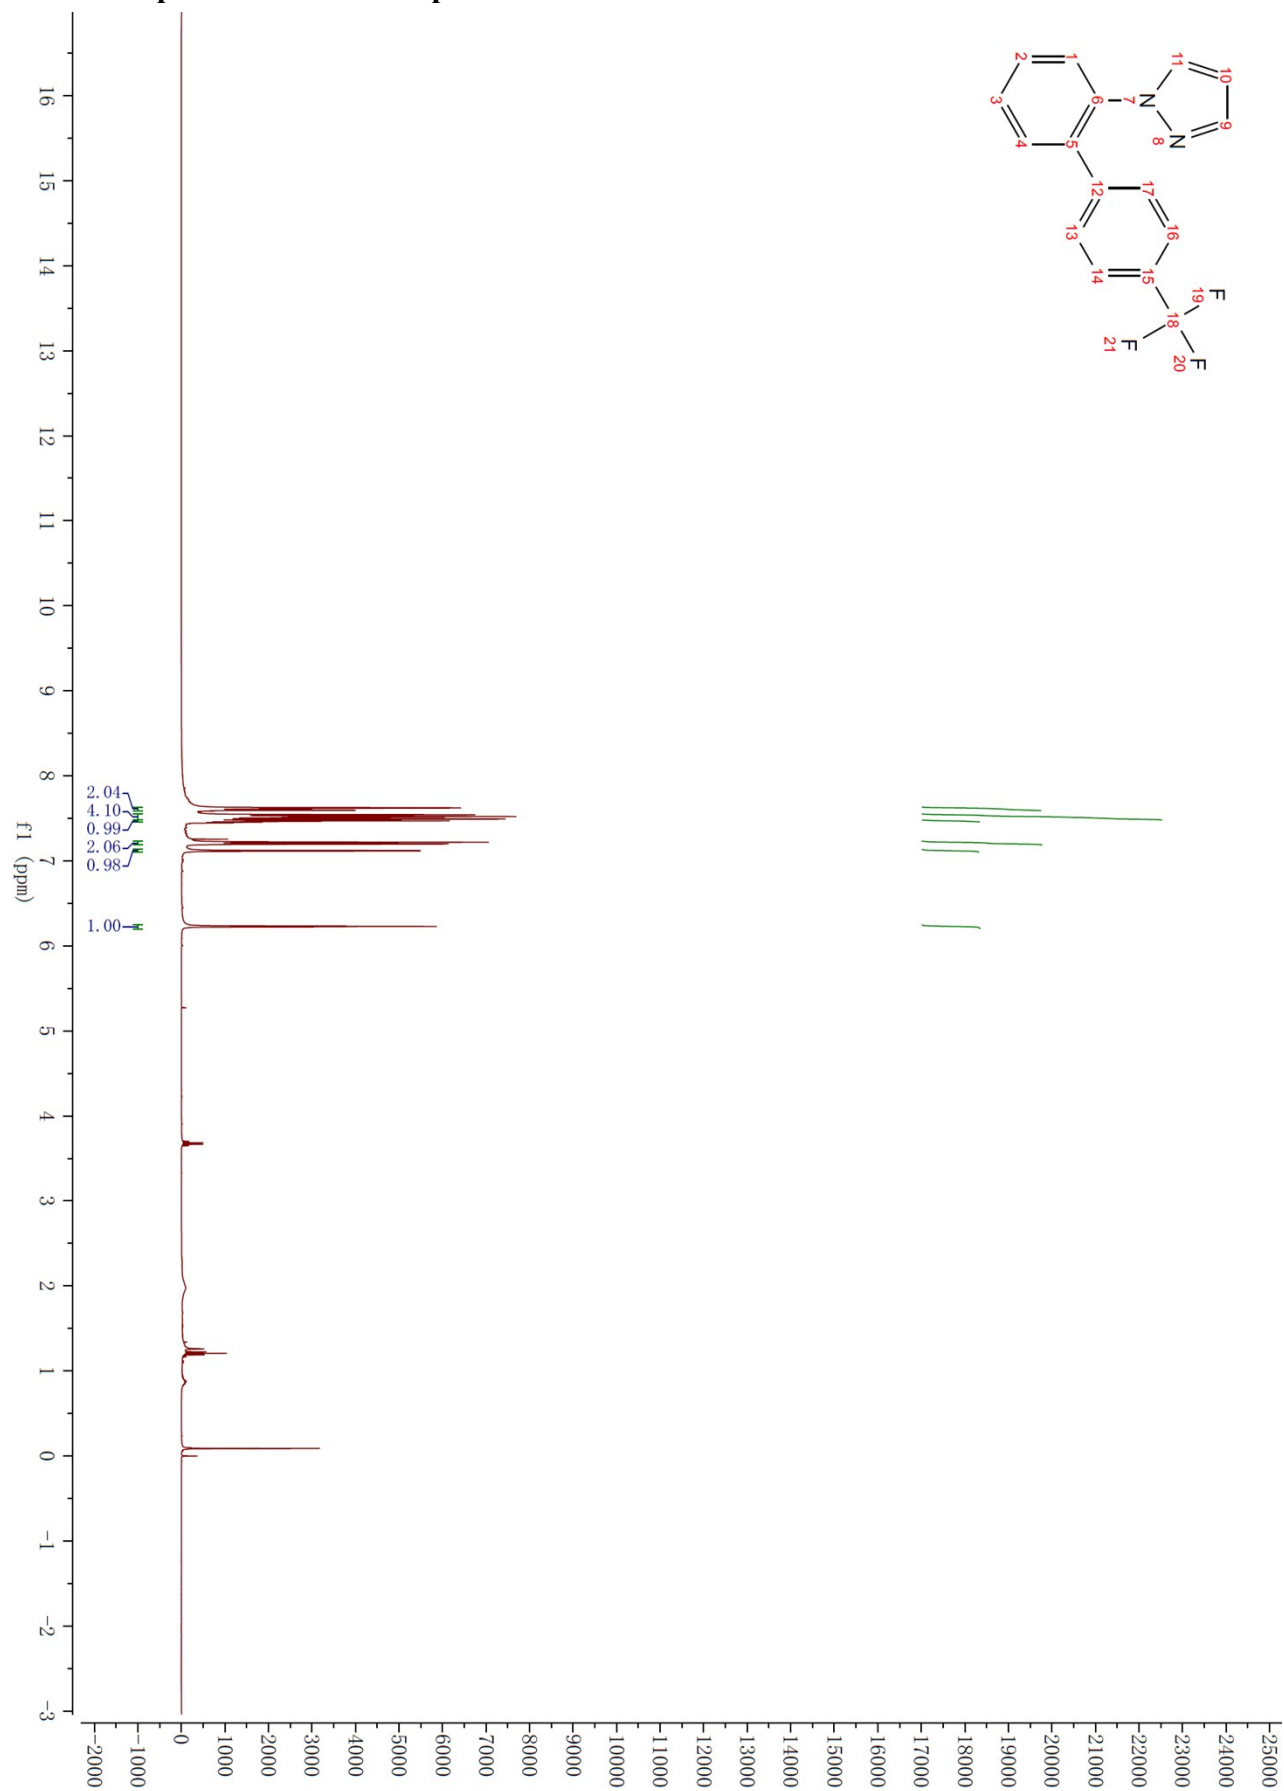

# <sup>13</sup>C NMR Spectrum of the Compound 3bm

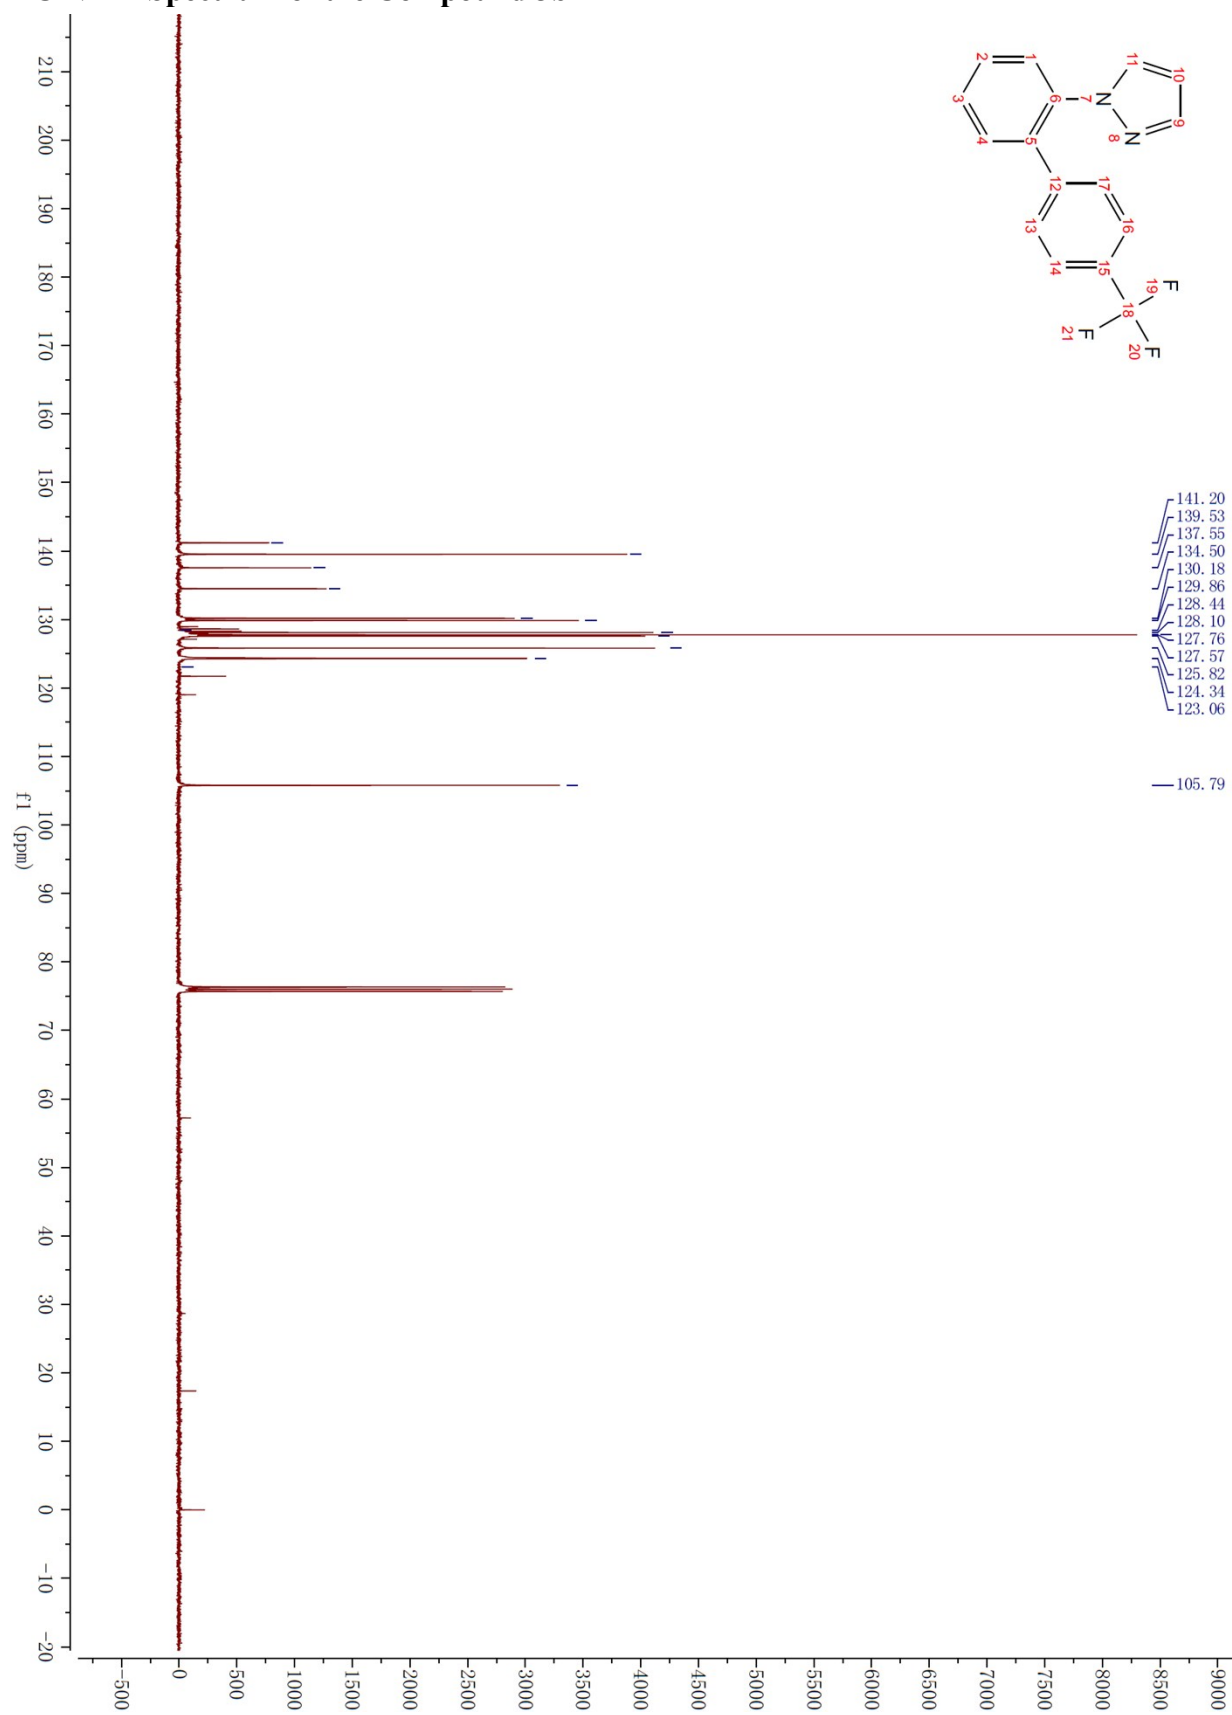

# <sup>1</sup>H NMR Spectrum of the Compound 4bm

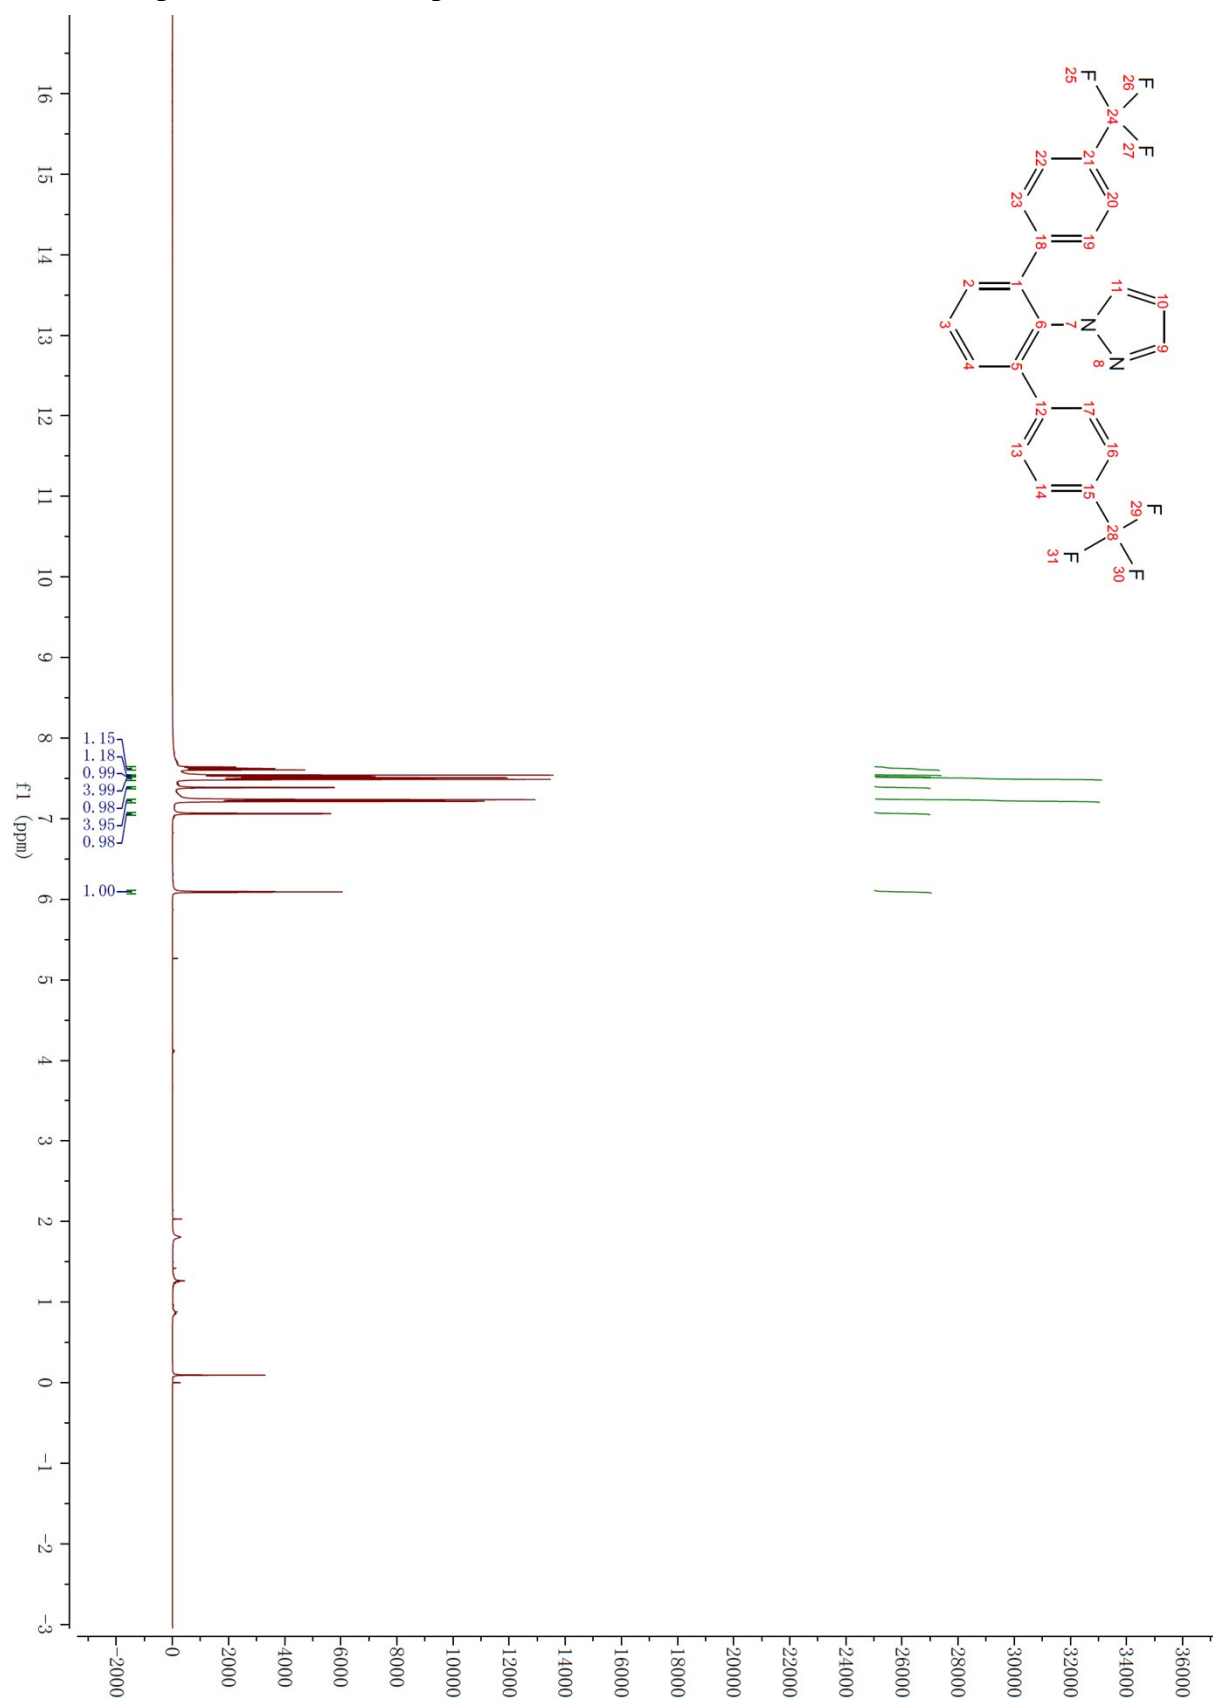



# <sup>13</sup>C NMR Spectrum of the Compound 4bm

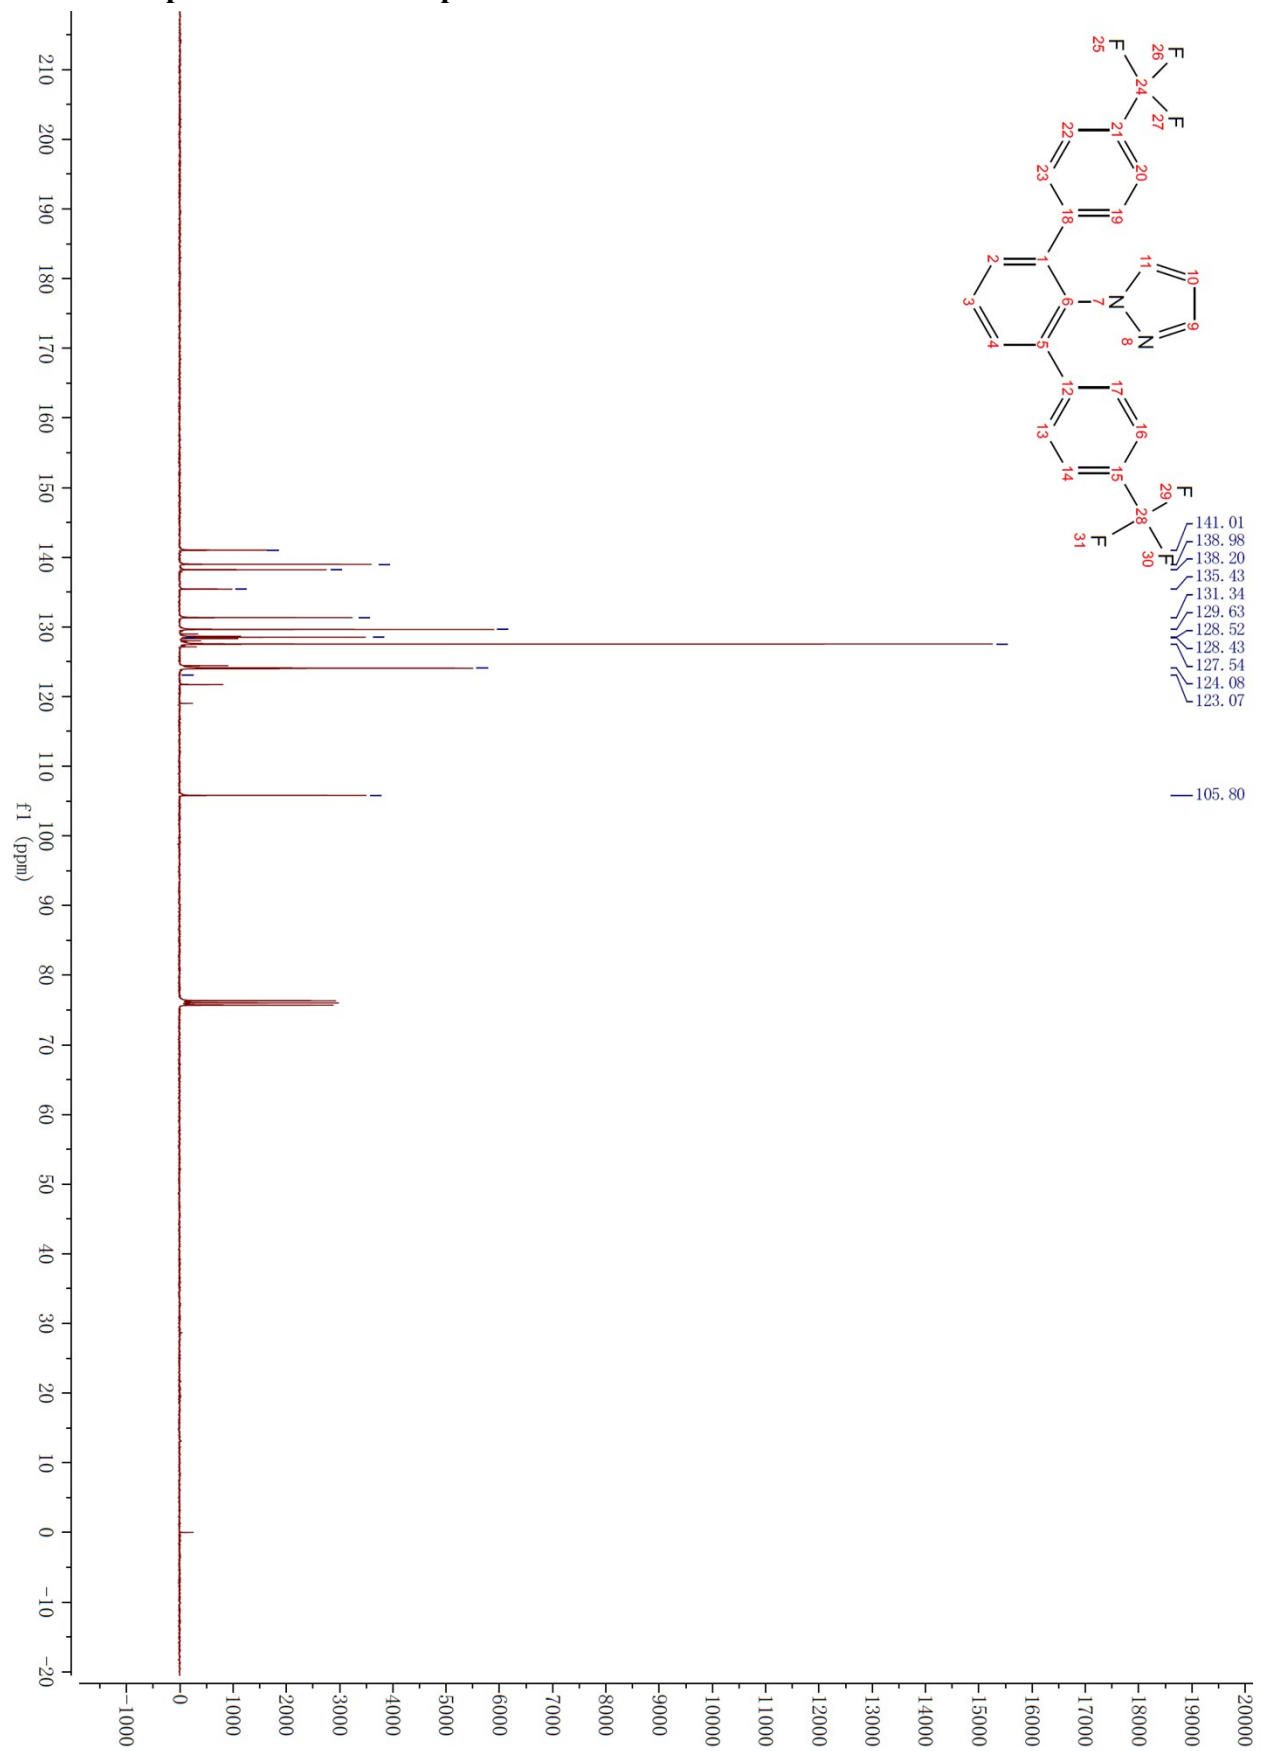

# <sup>1</sup>H NMR Spectrum of the Compound 3ao

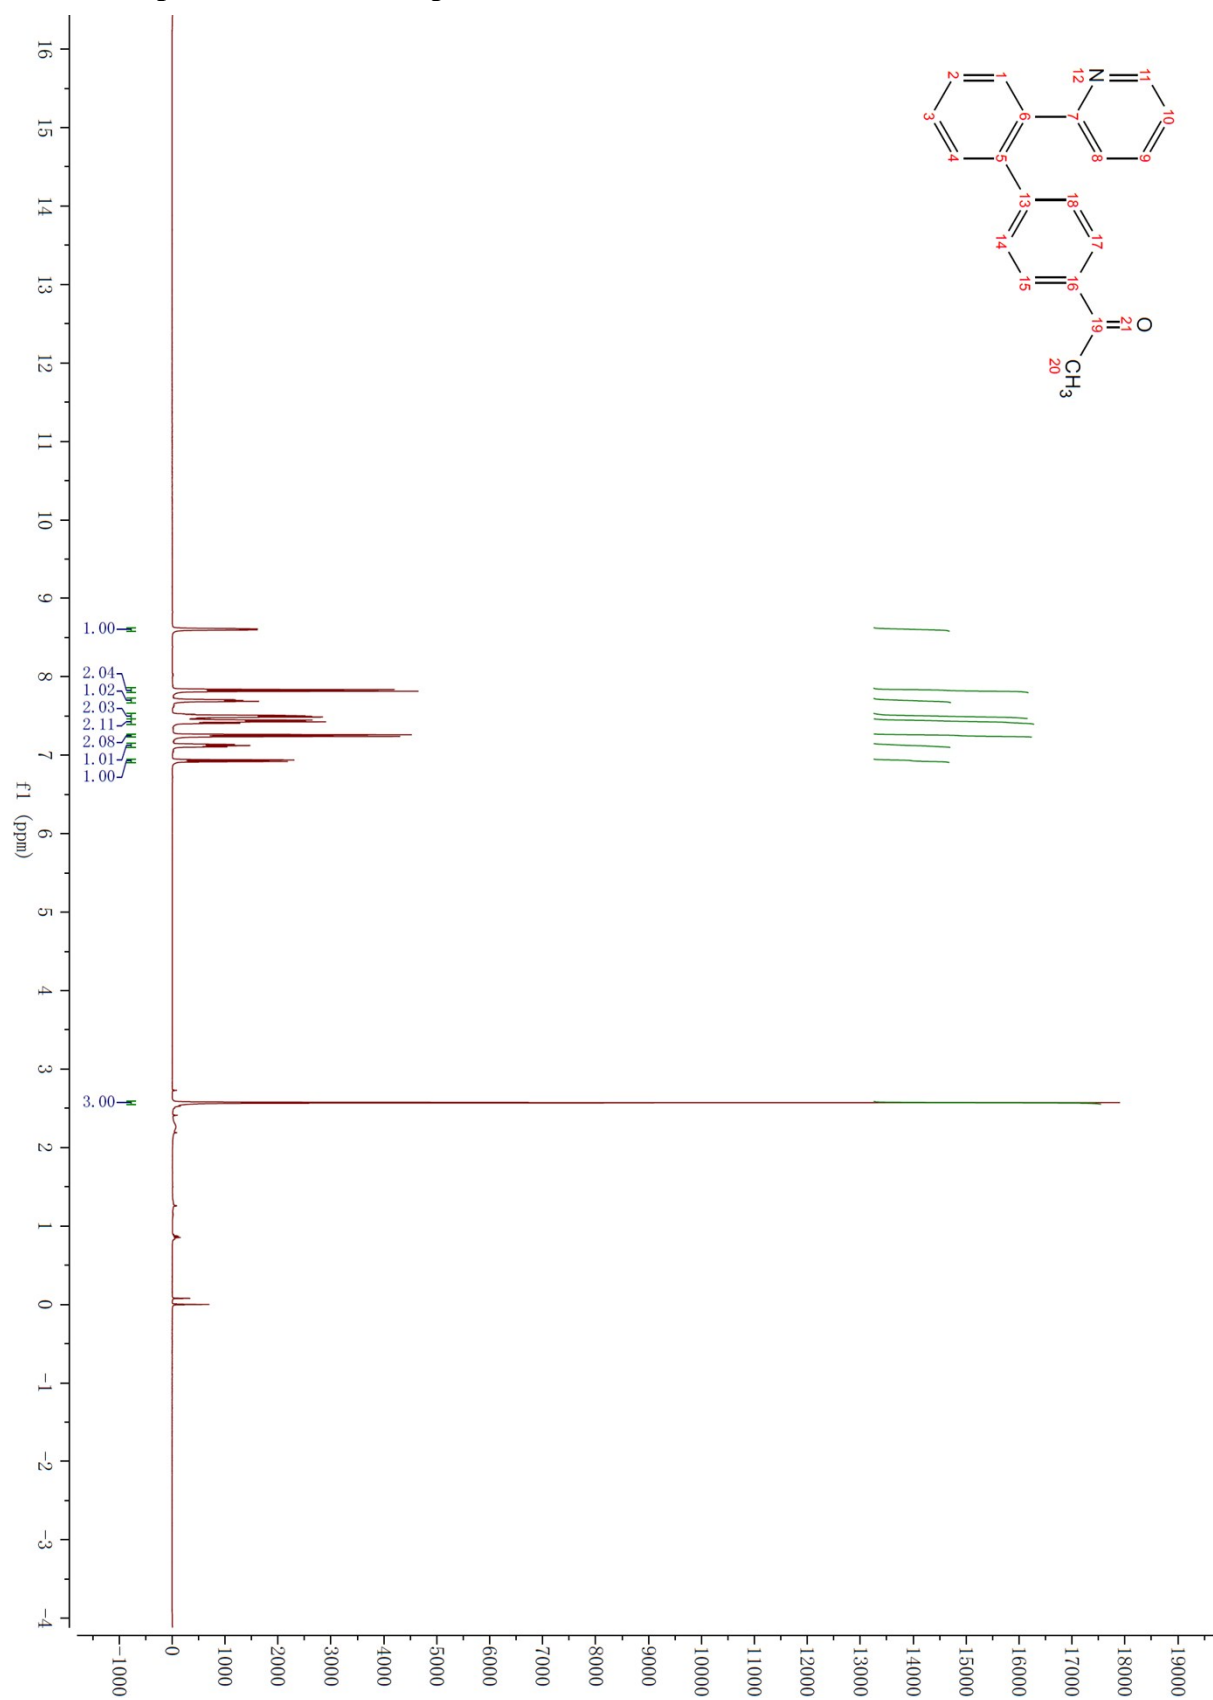

# <sup>13</sup>C NMR Spectrum of the Compound 3ao

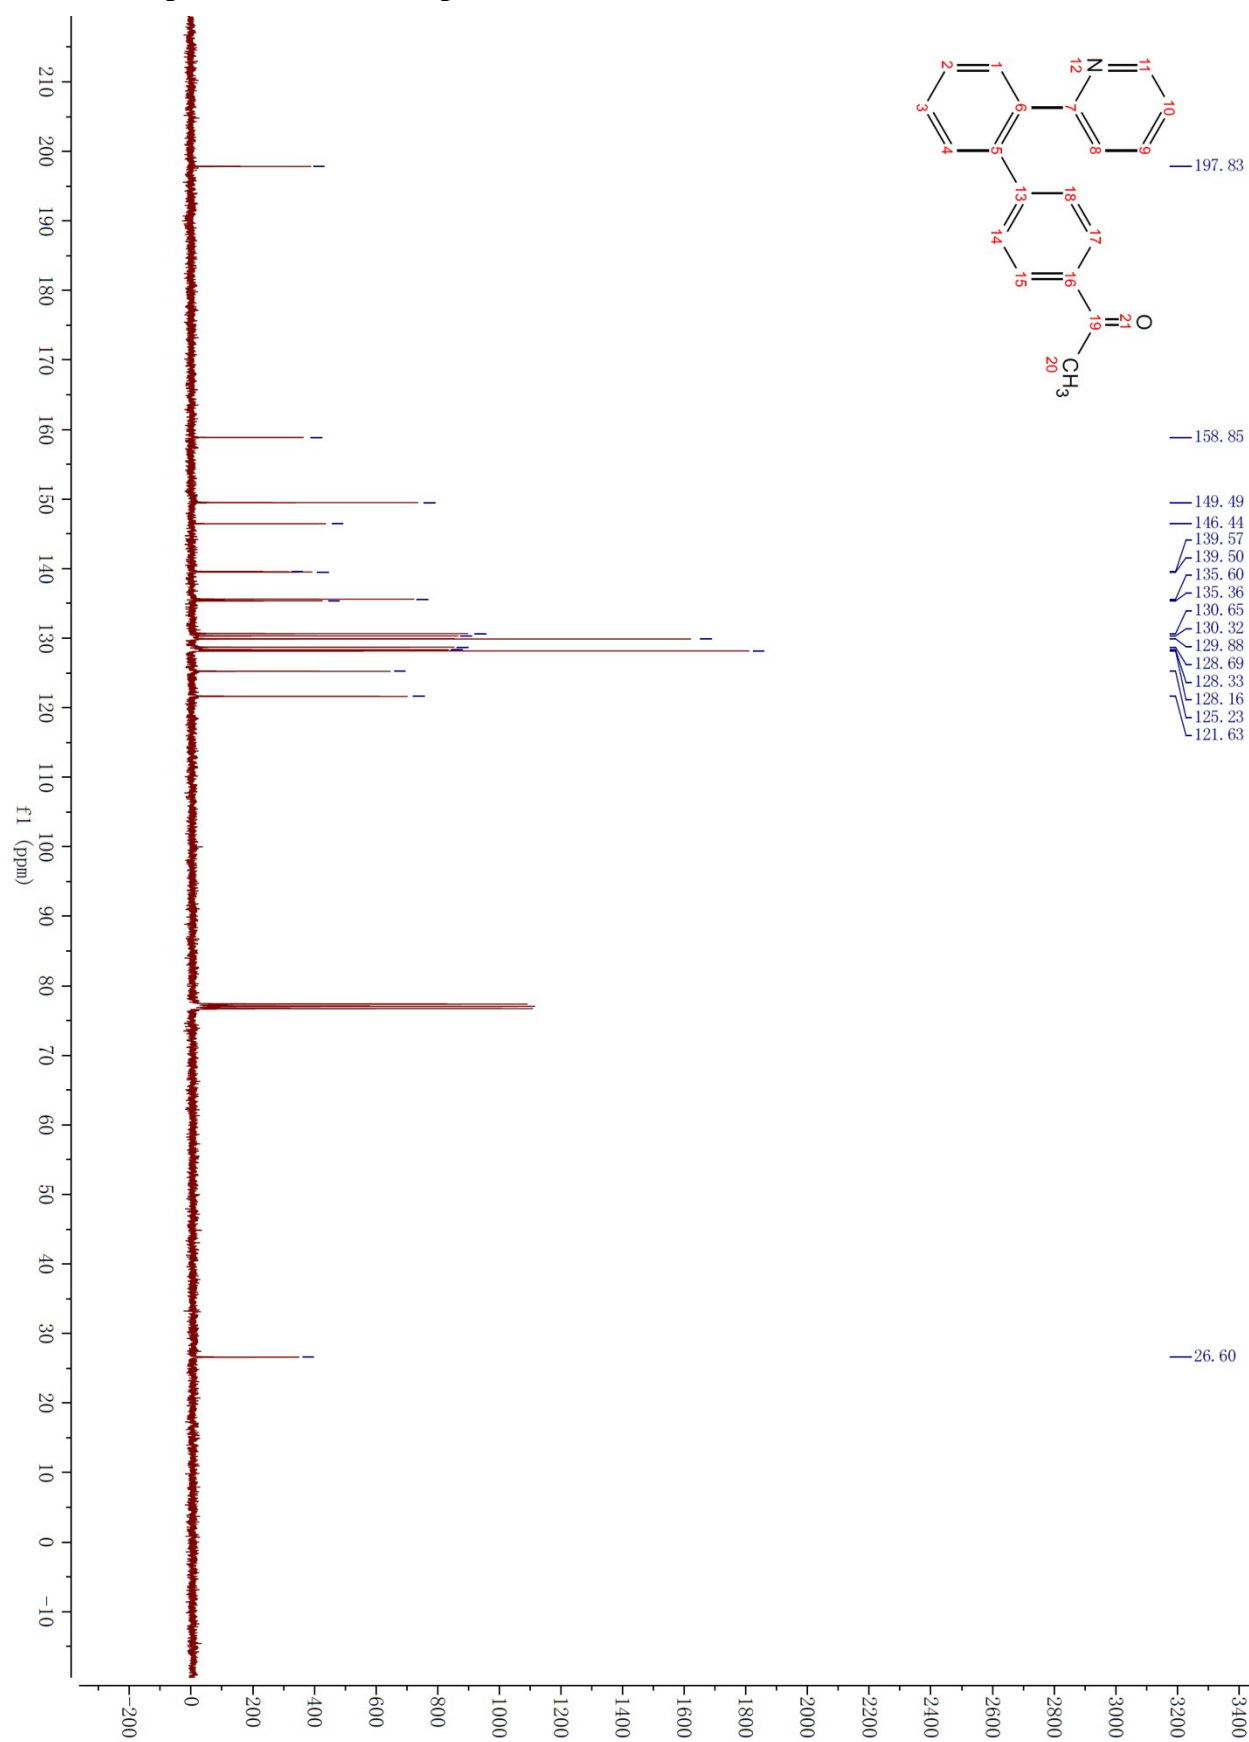

# <sup>1</sup>H NMR Spectrum of the Compound 4ao

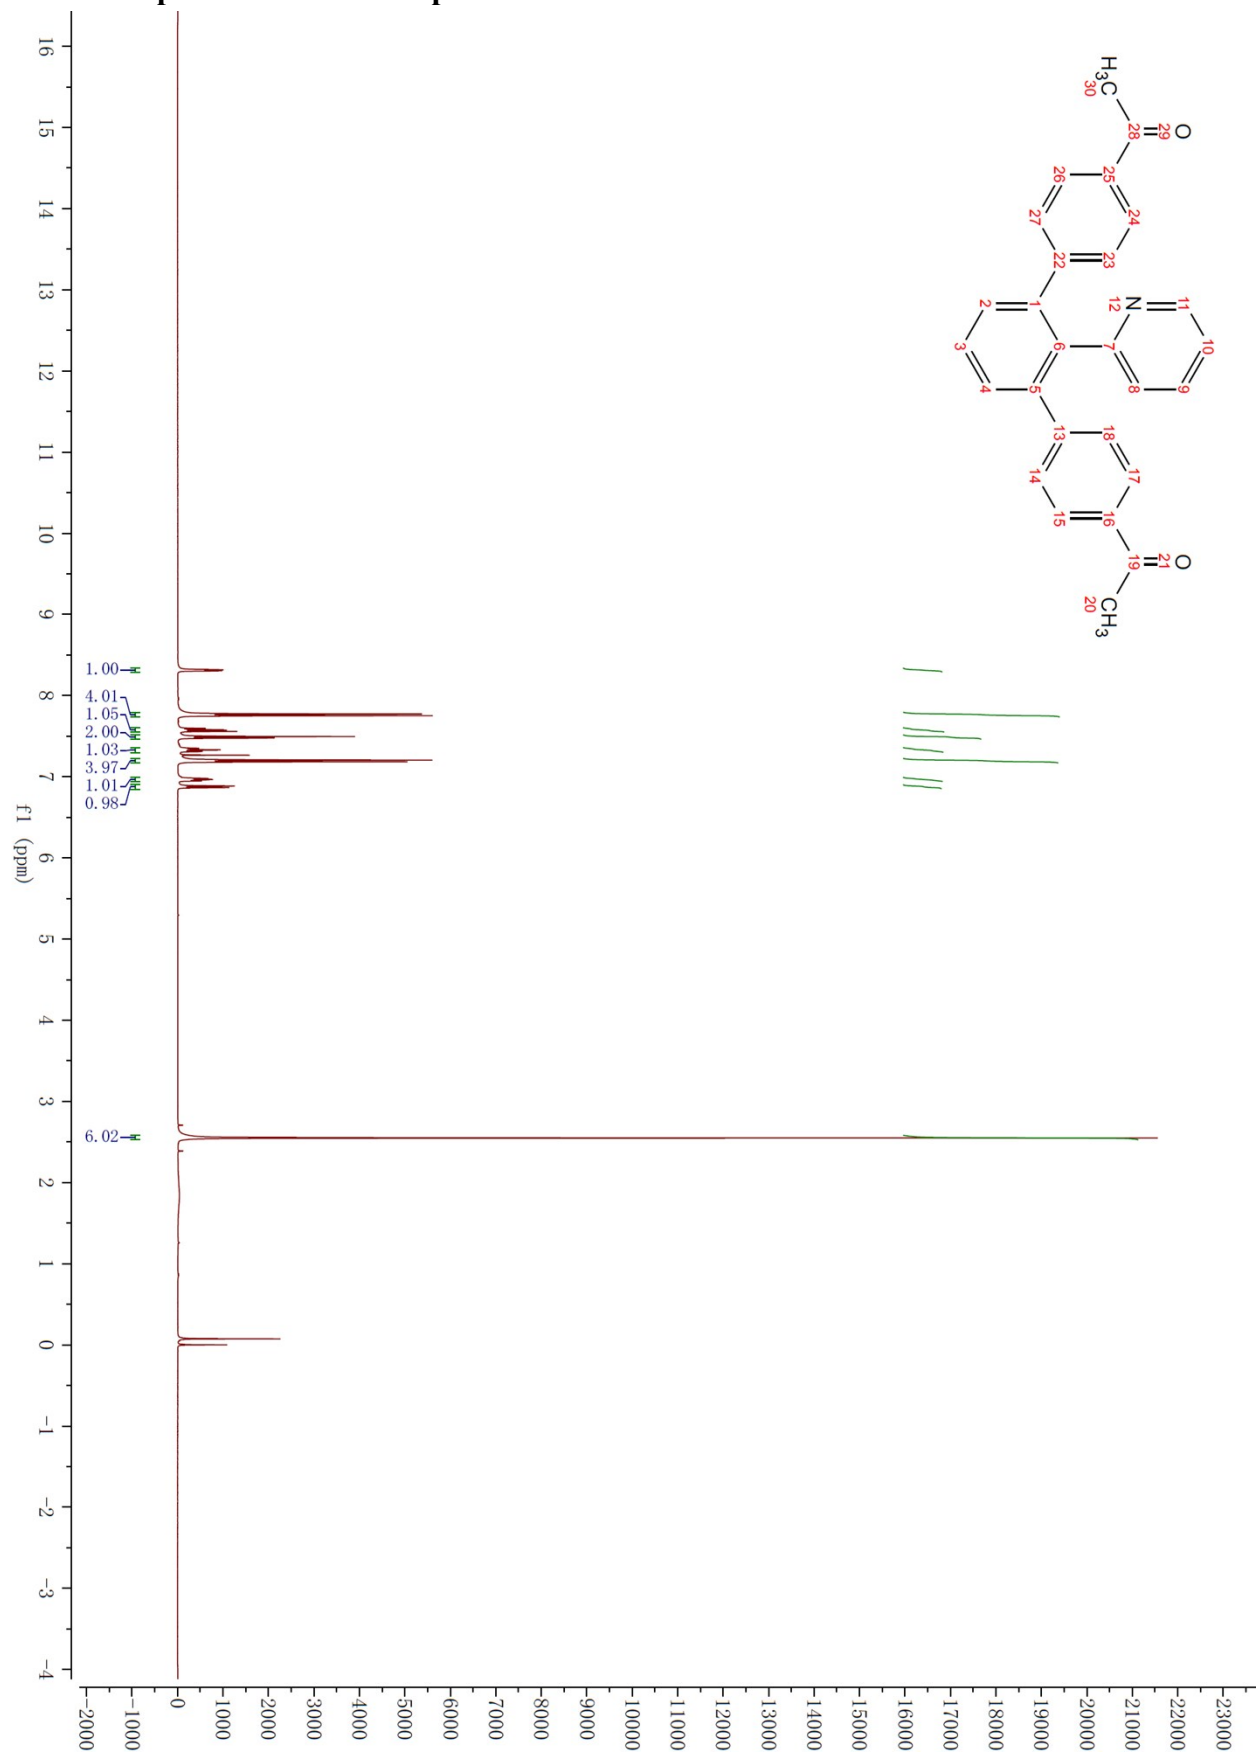

# <sup>13</sup>C NMR Spectrum of the Compound 4ao

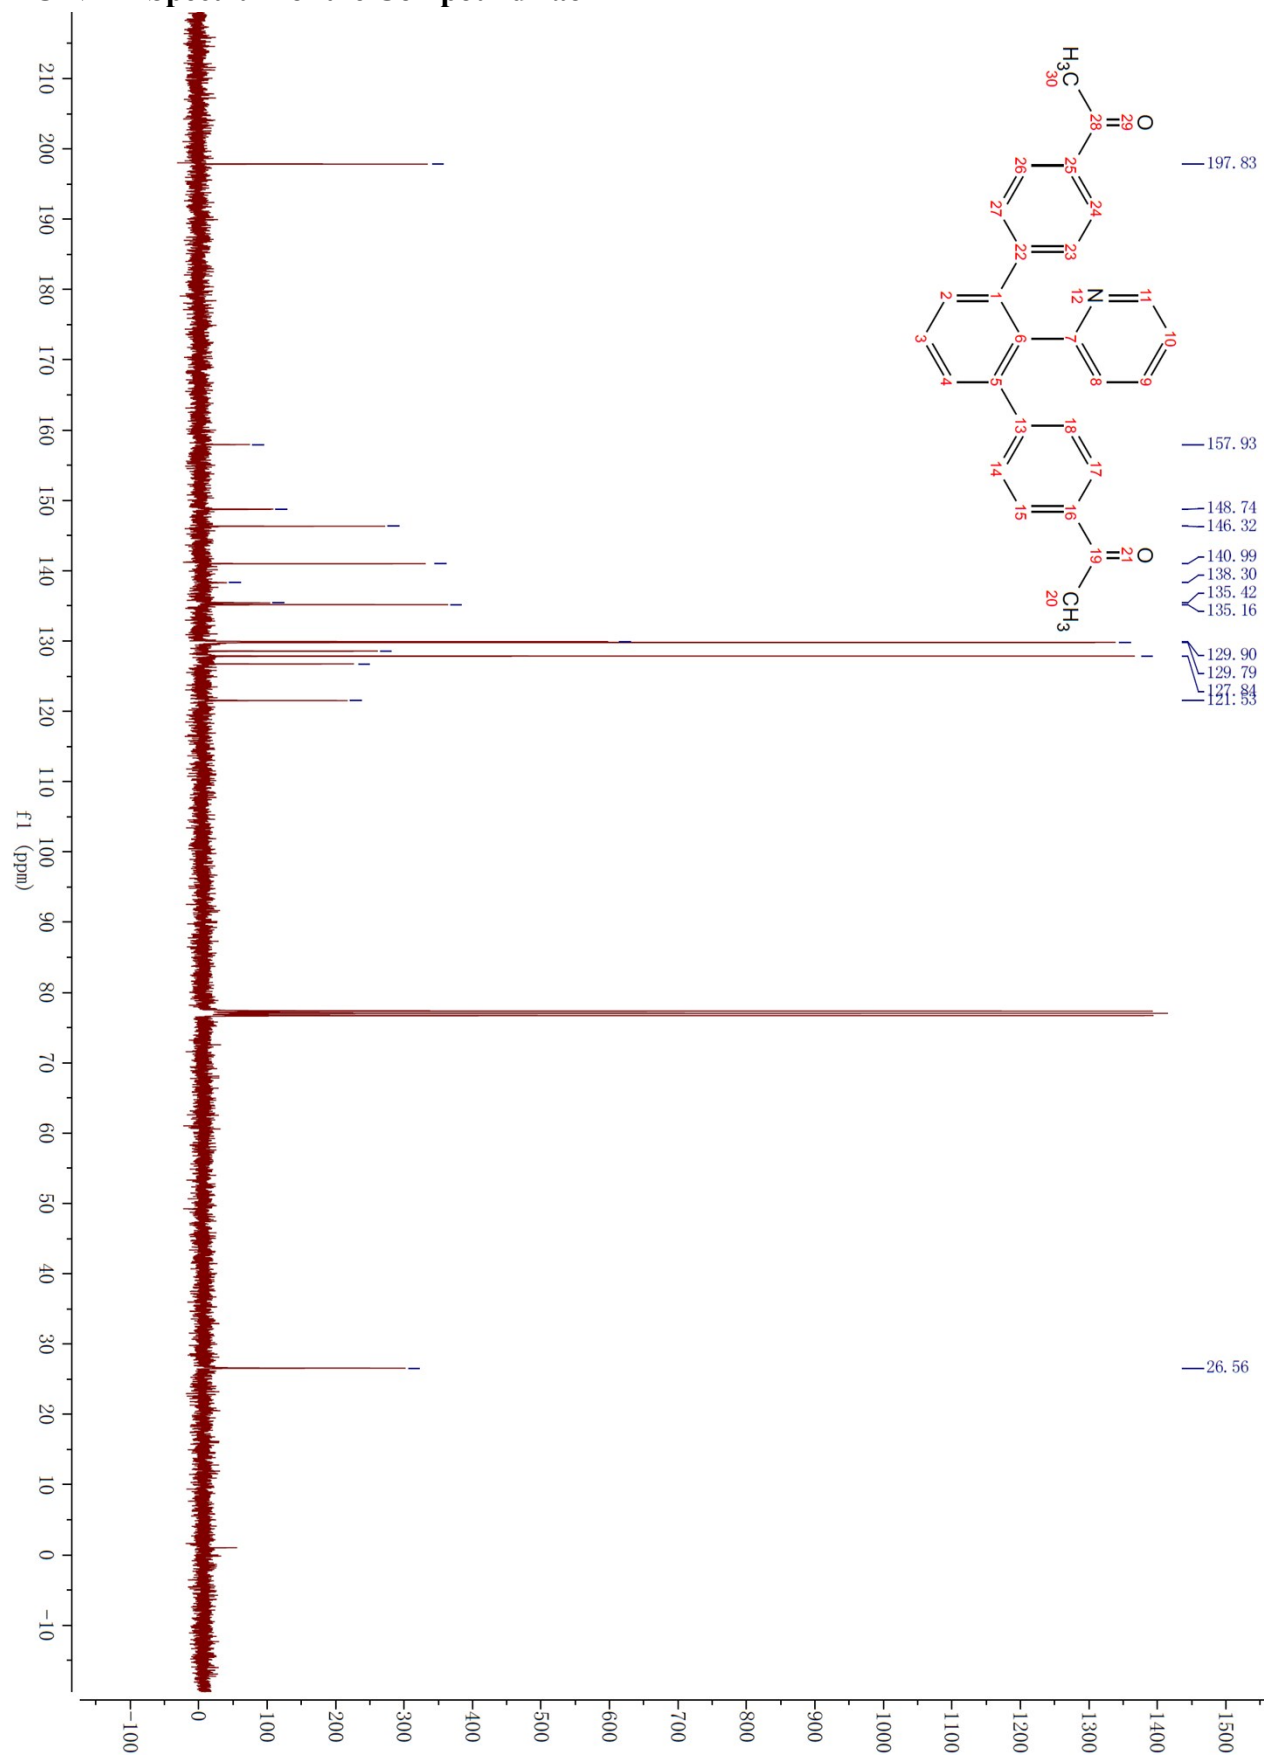

# <sup>1</sup>H NMR Spectrum of the Compound 3fm

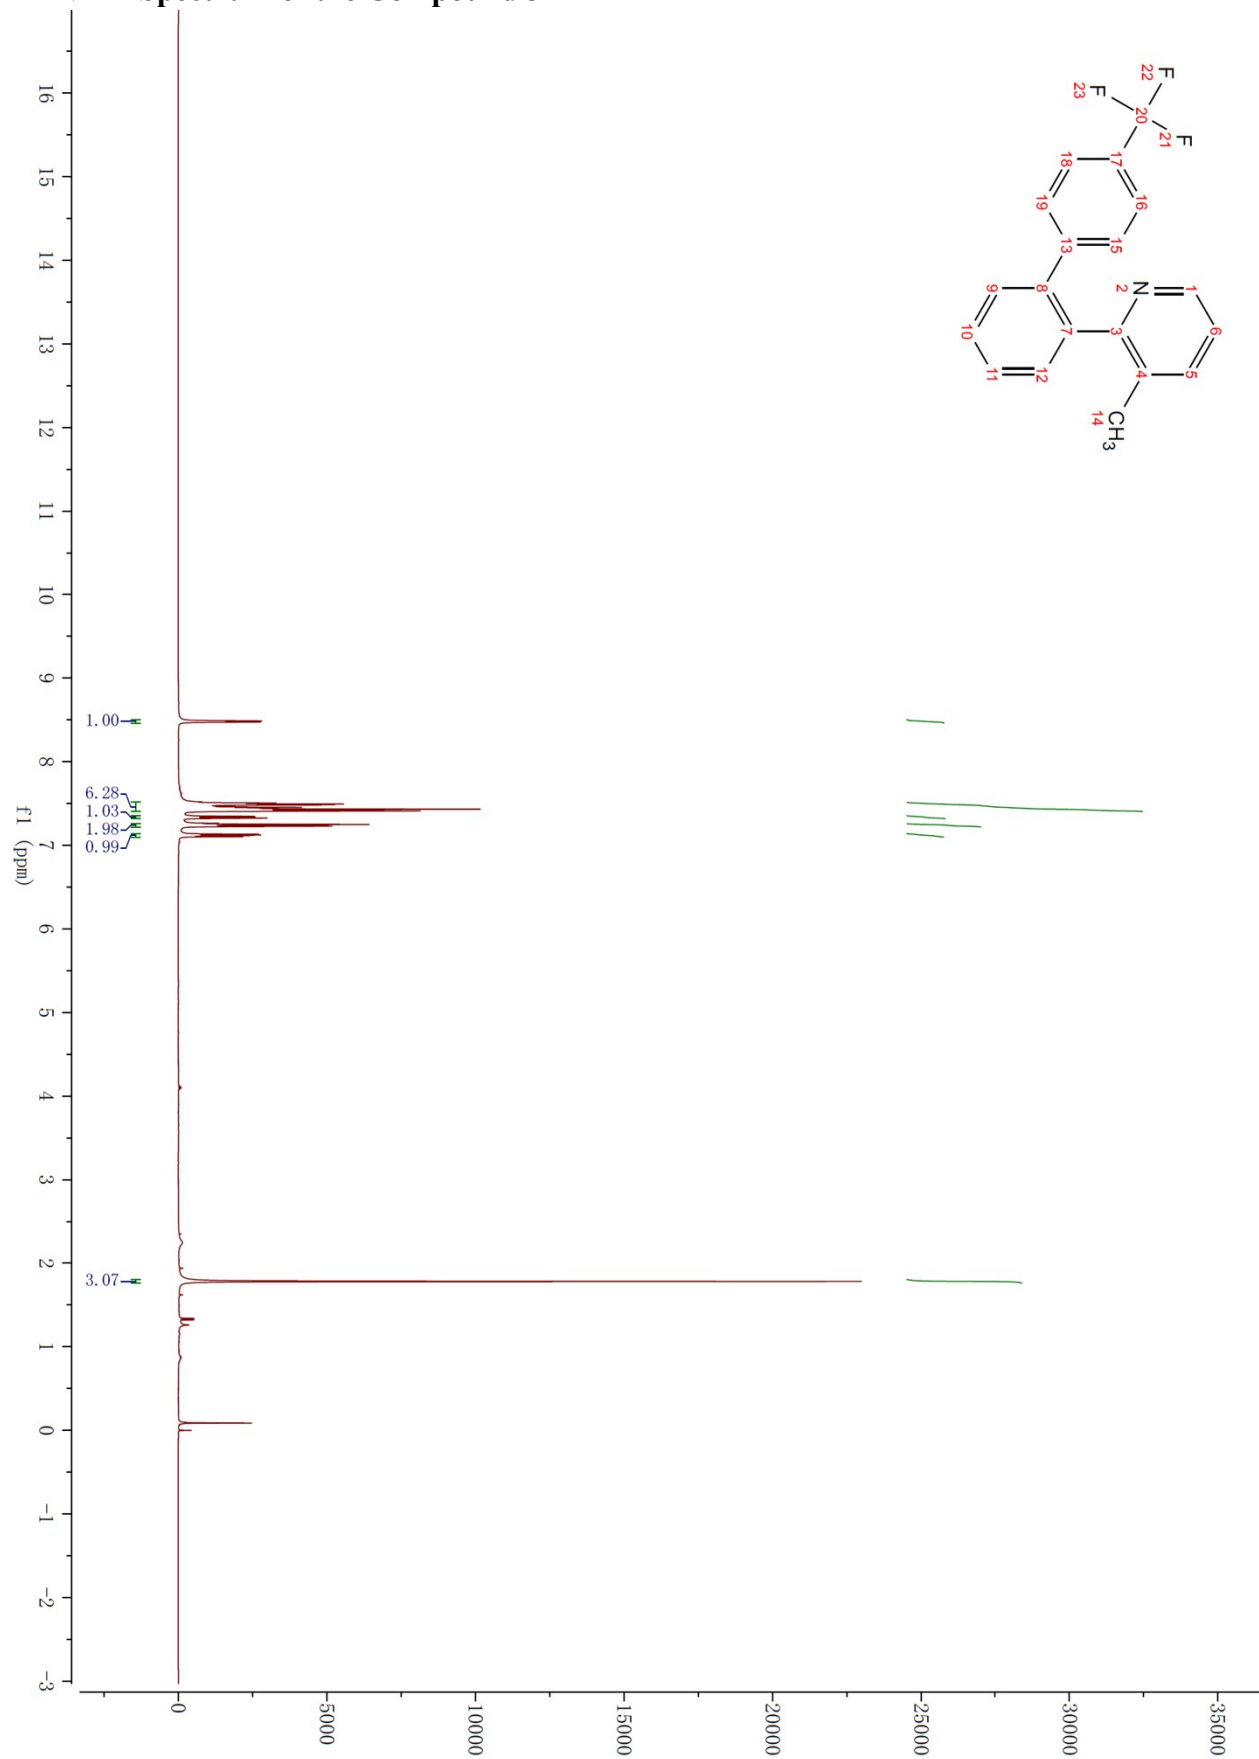

# <sup>13</sup>C NMR Spectrum of the Compound 3fm

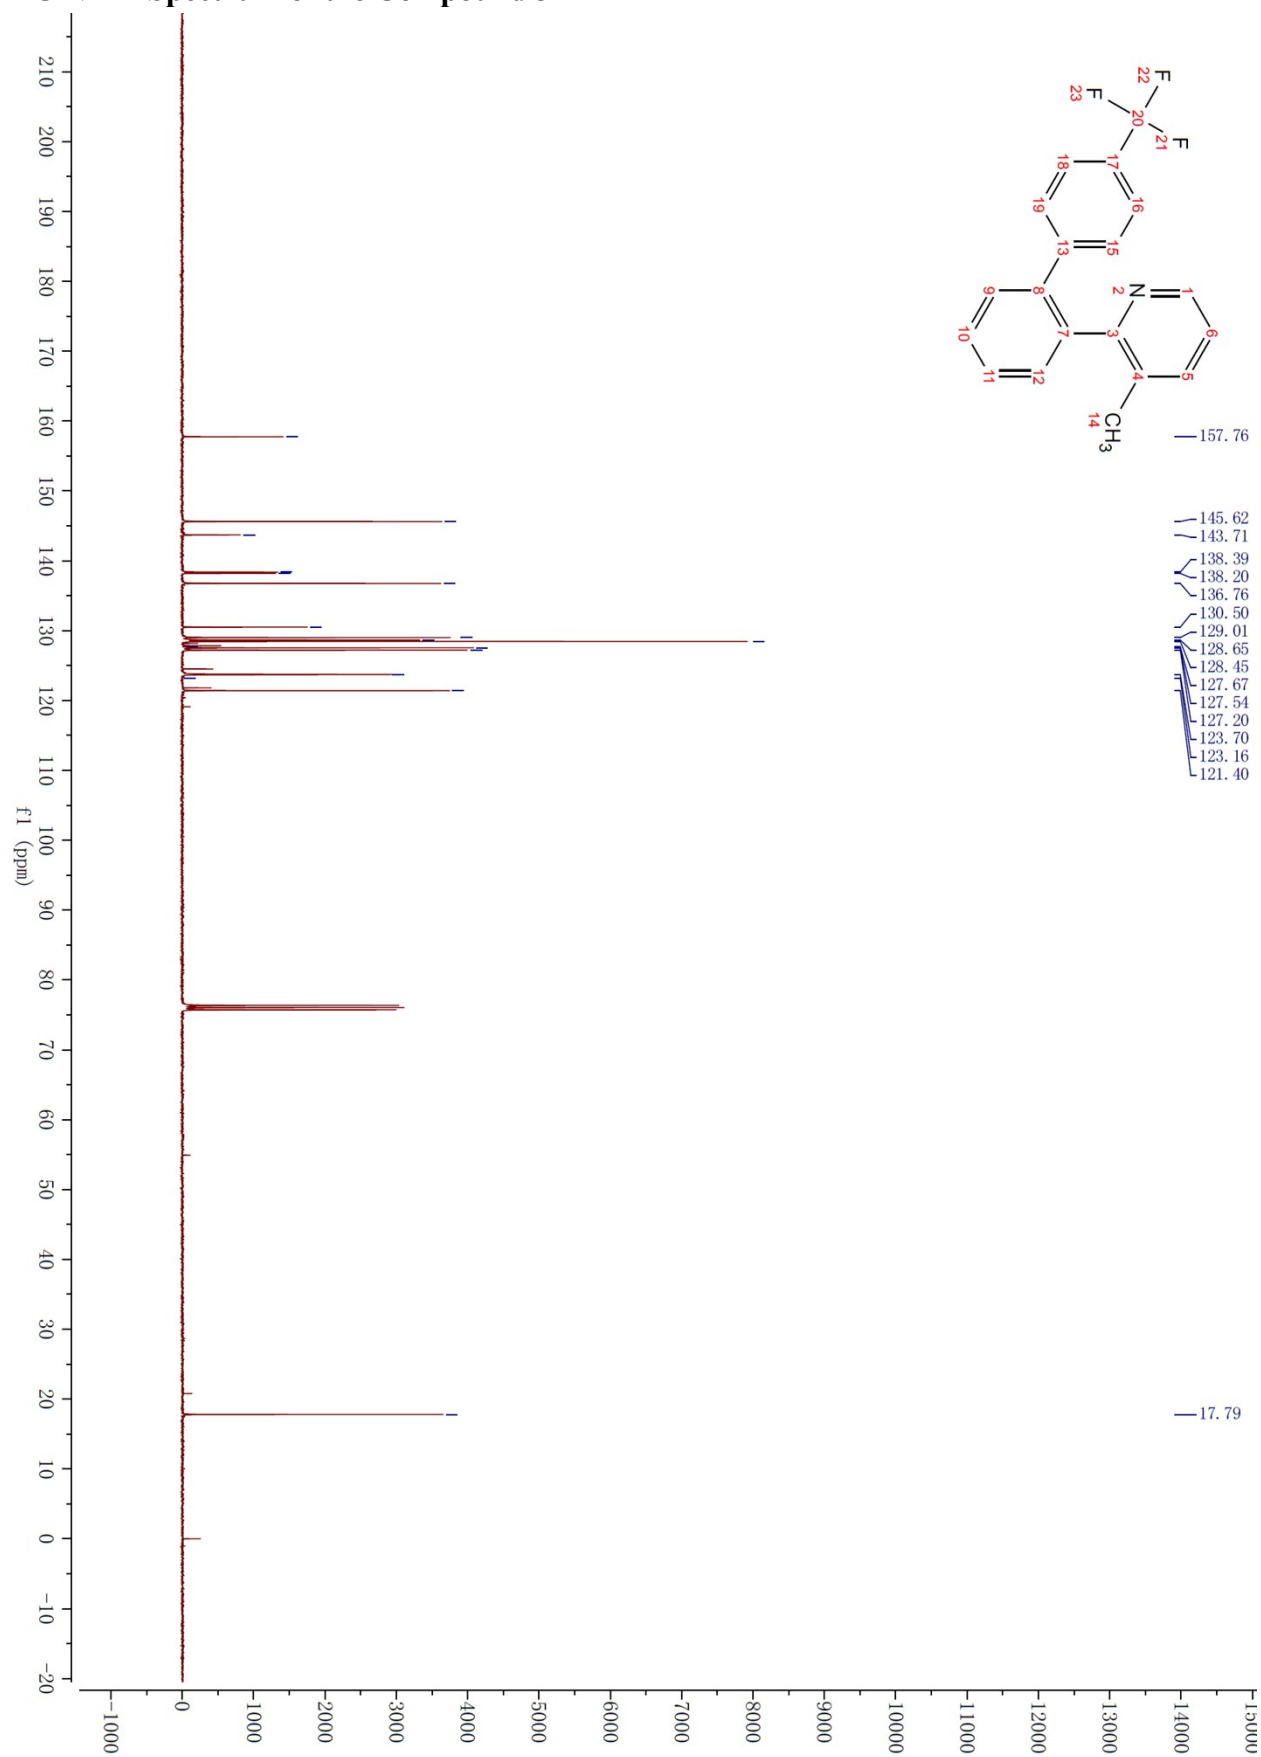

# <sup>1</sup>H NMR Spectrum of the Compound 4fm

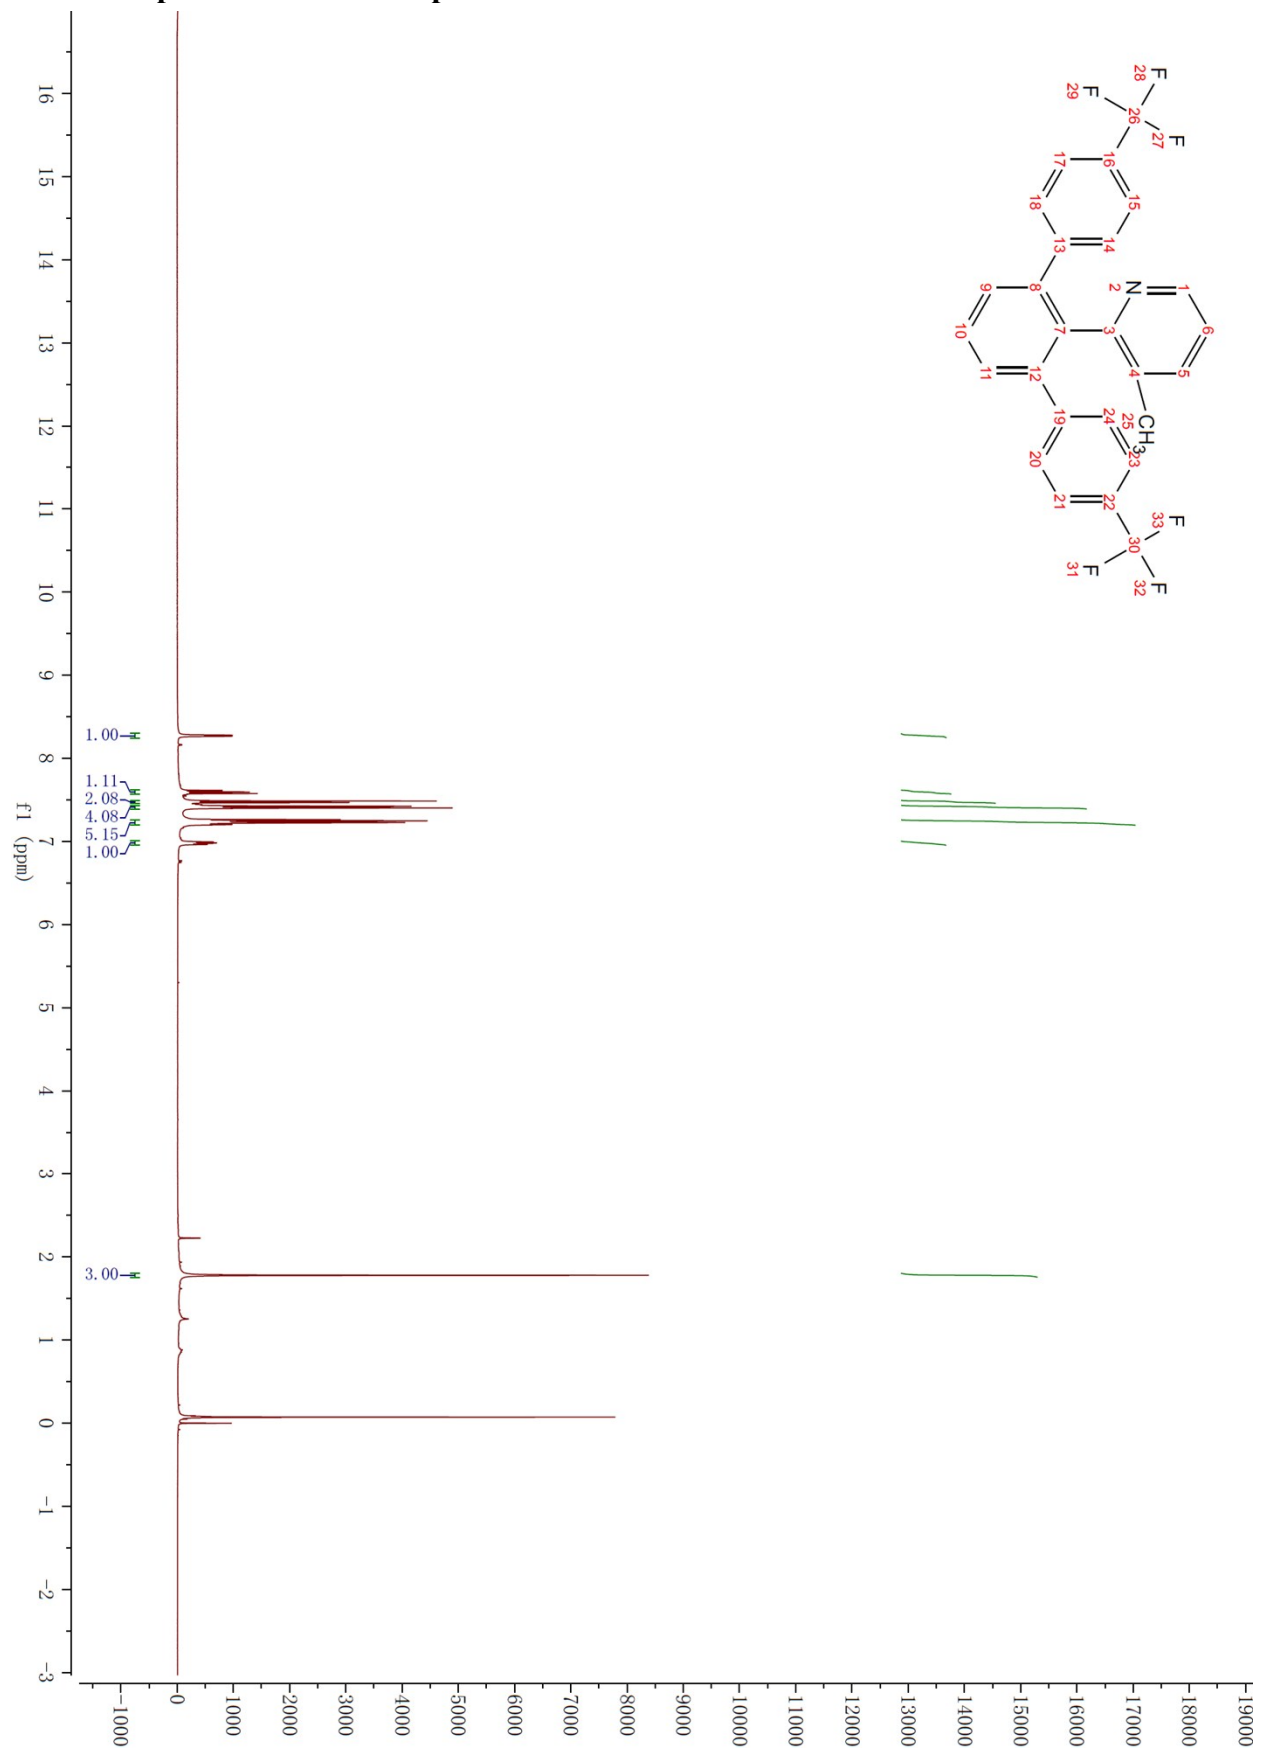



# <sup>13</sup>C NMR Spectrum of the Compound 4fm

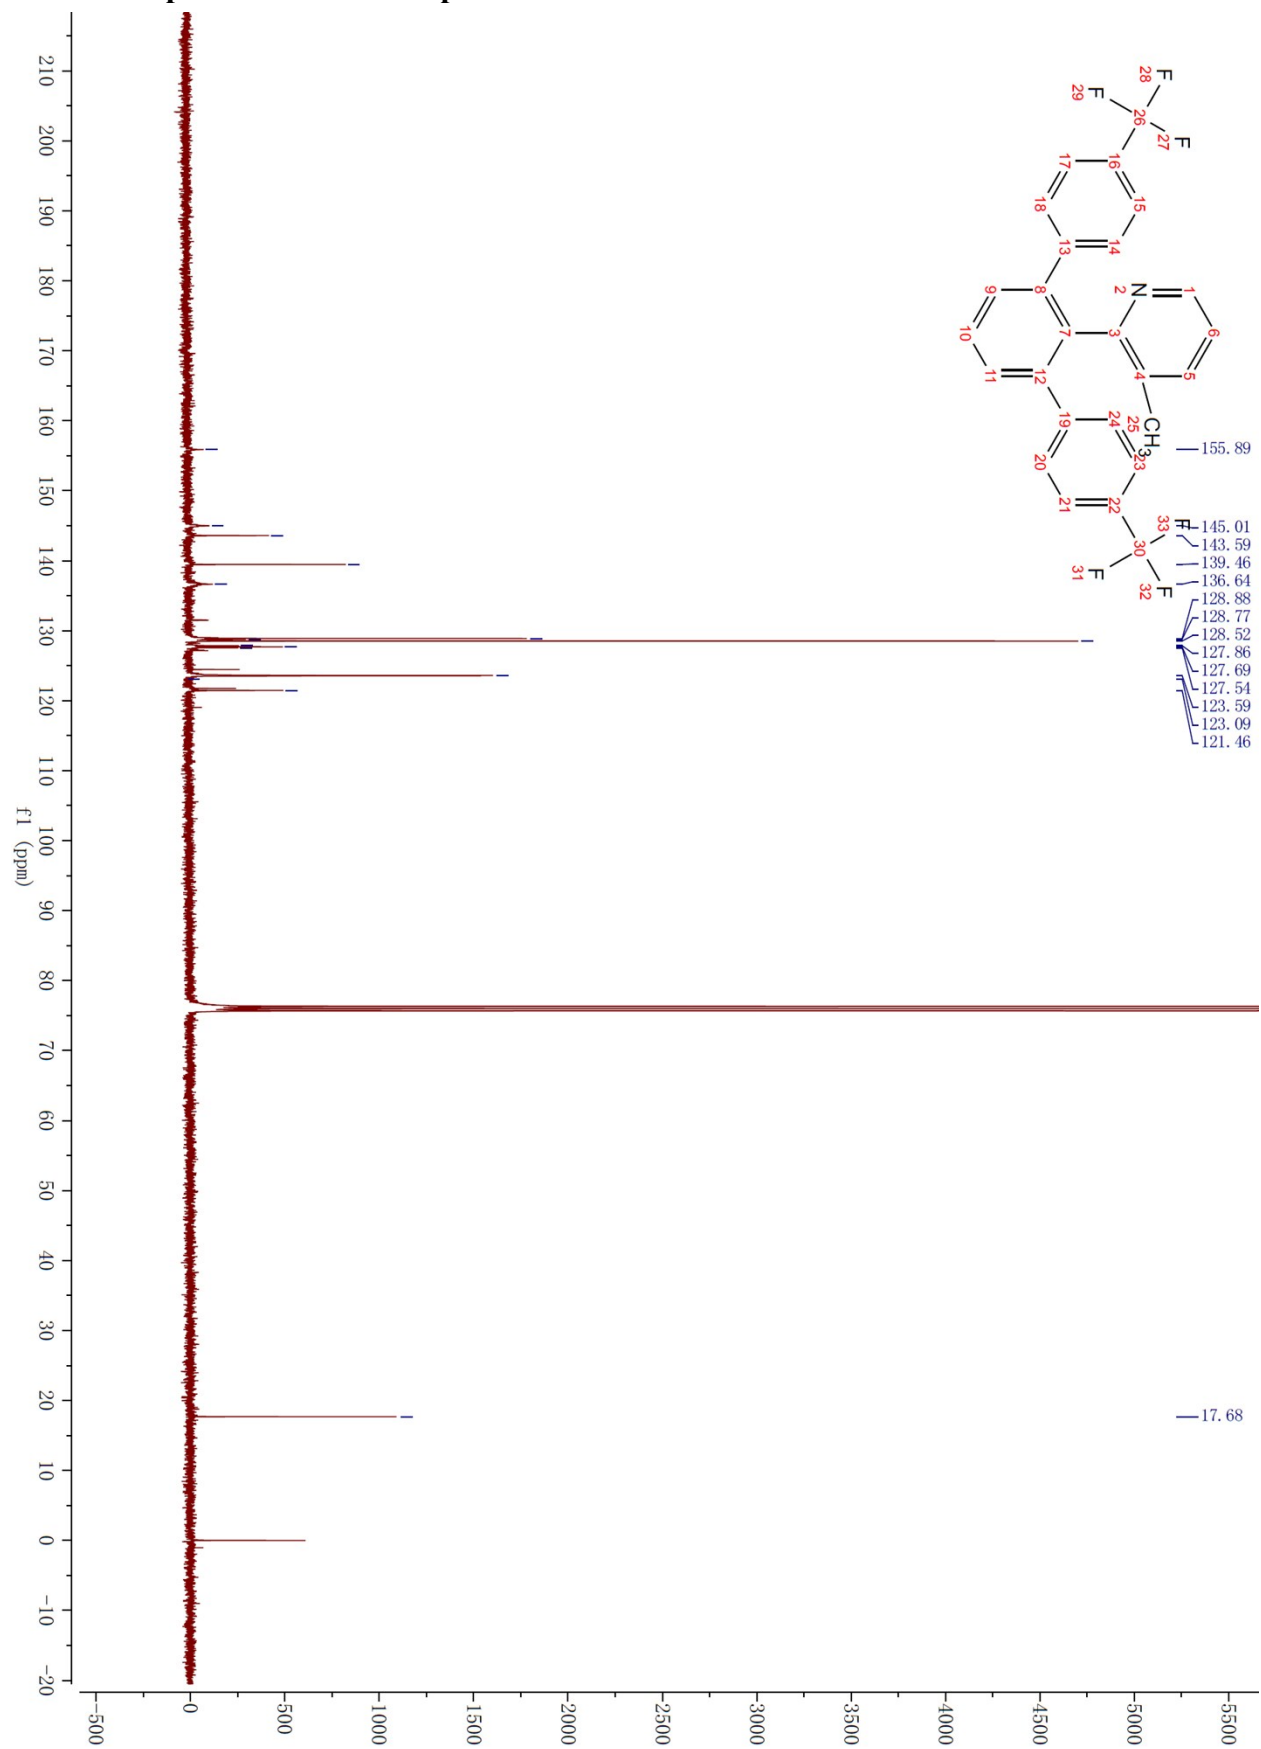

# <sup>1</sup>H NMR Spectrum of the Compound 3dm

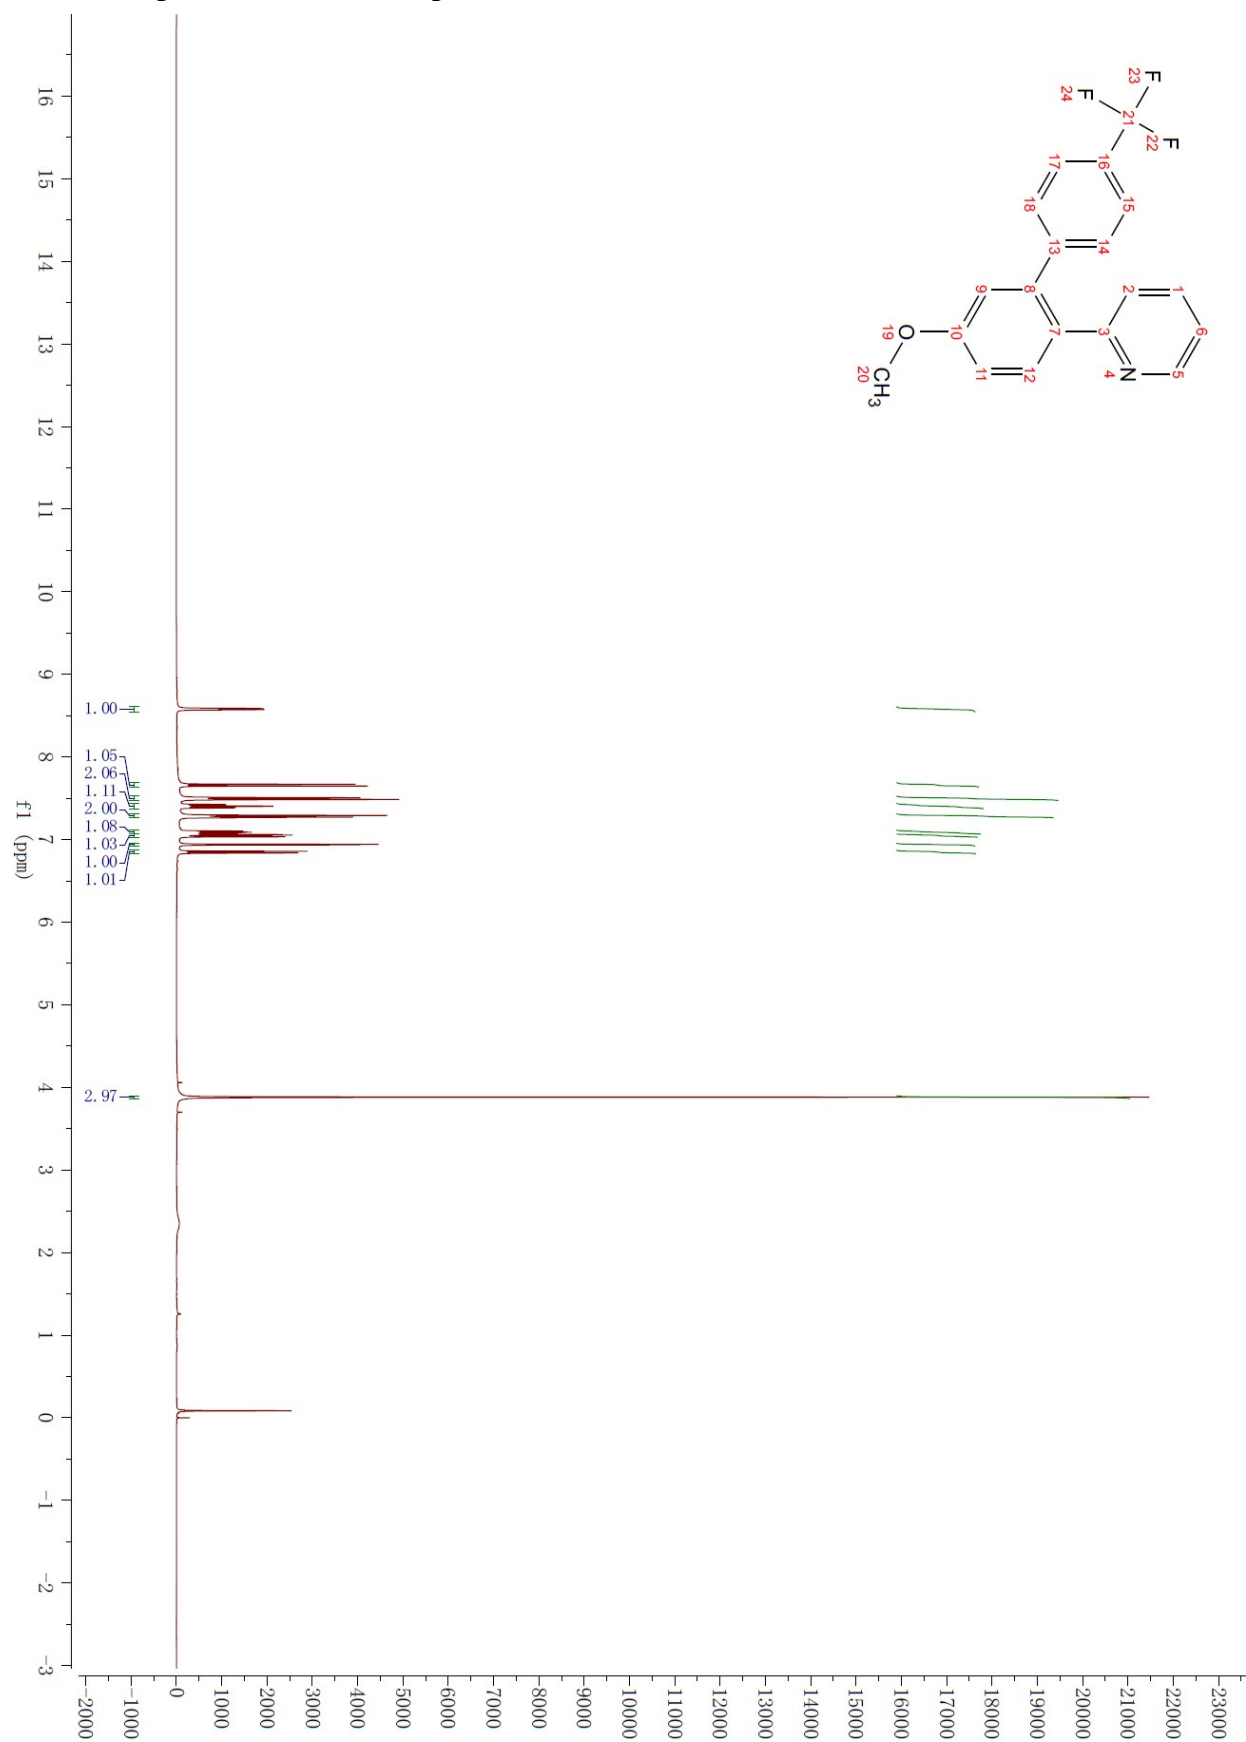

# <sup>13</sup>C NMR Spectrum of the Compound 3dm

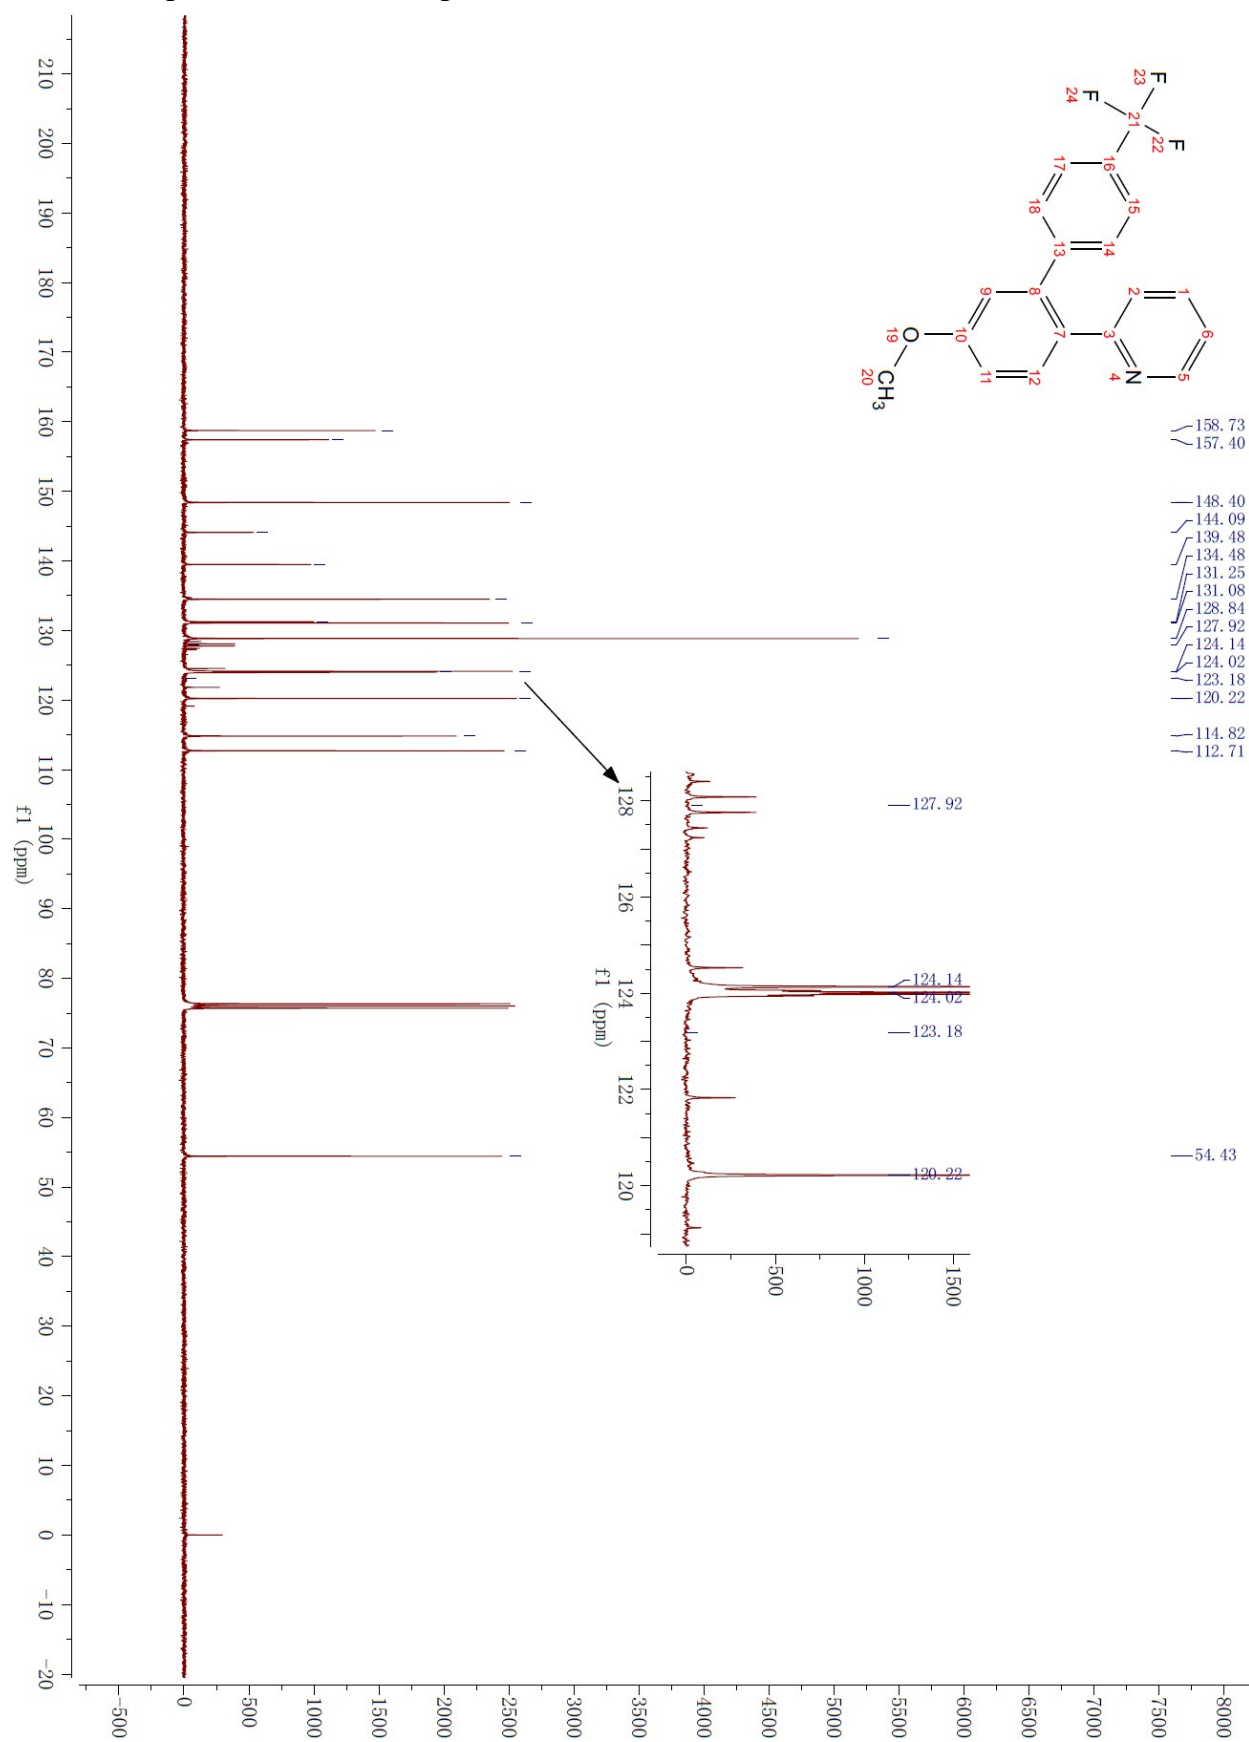

# <sup>1</sup>H NMR Spectrum of the Compound 4dm

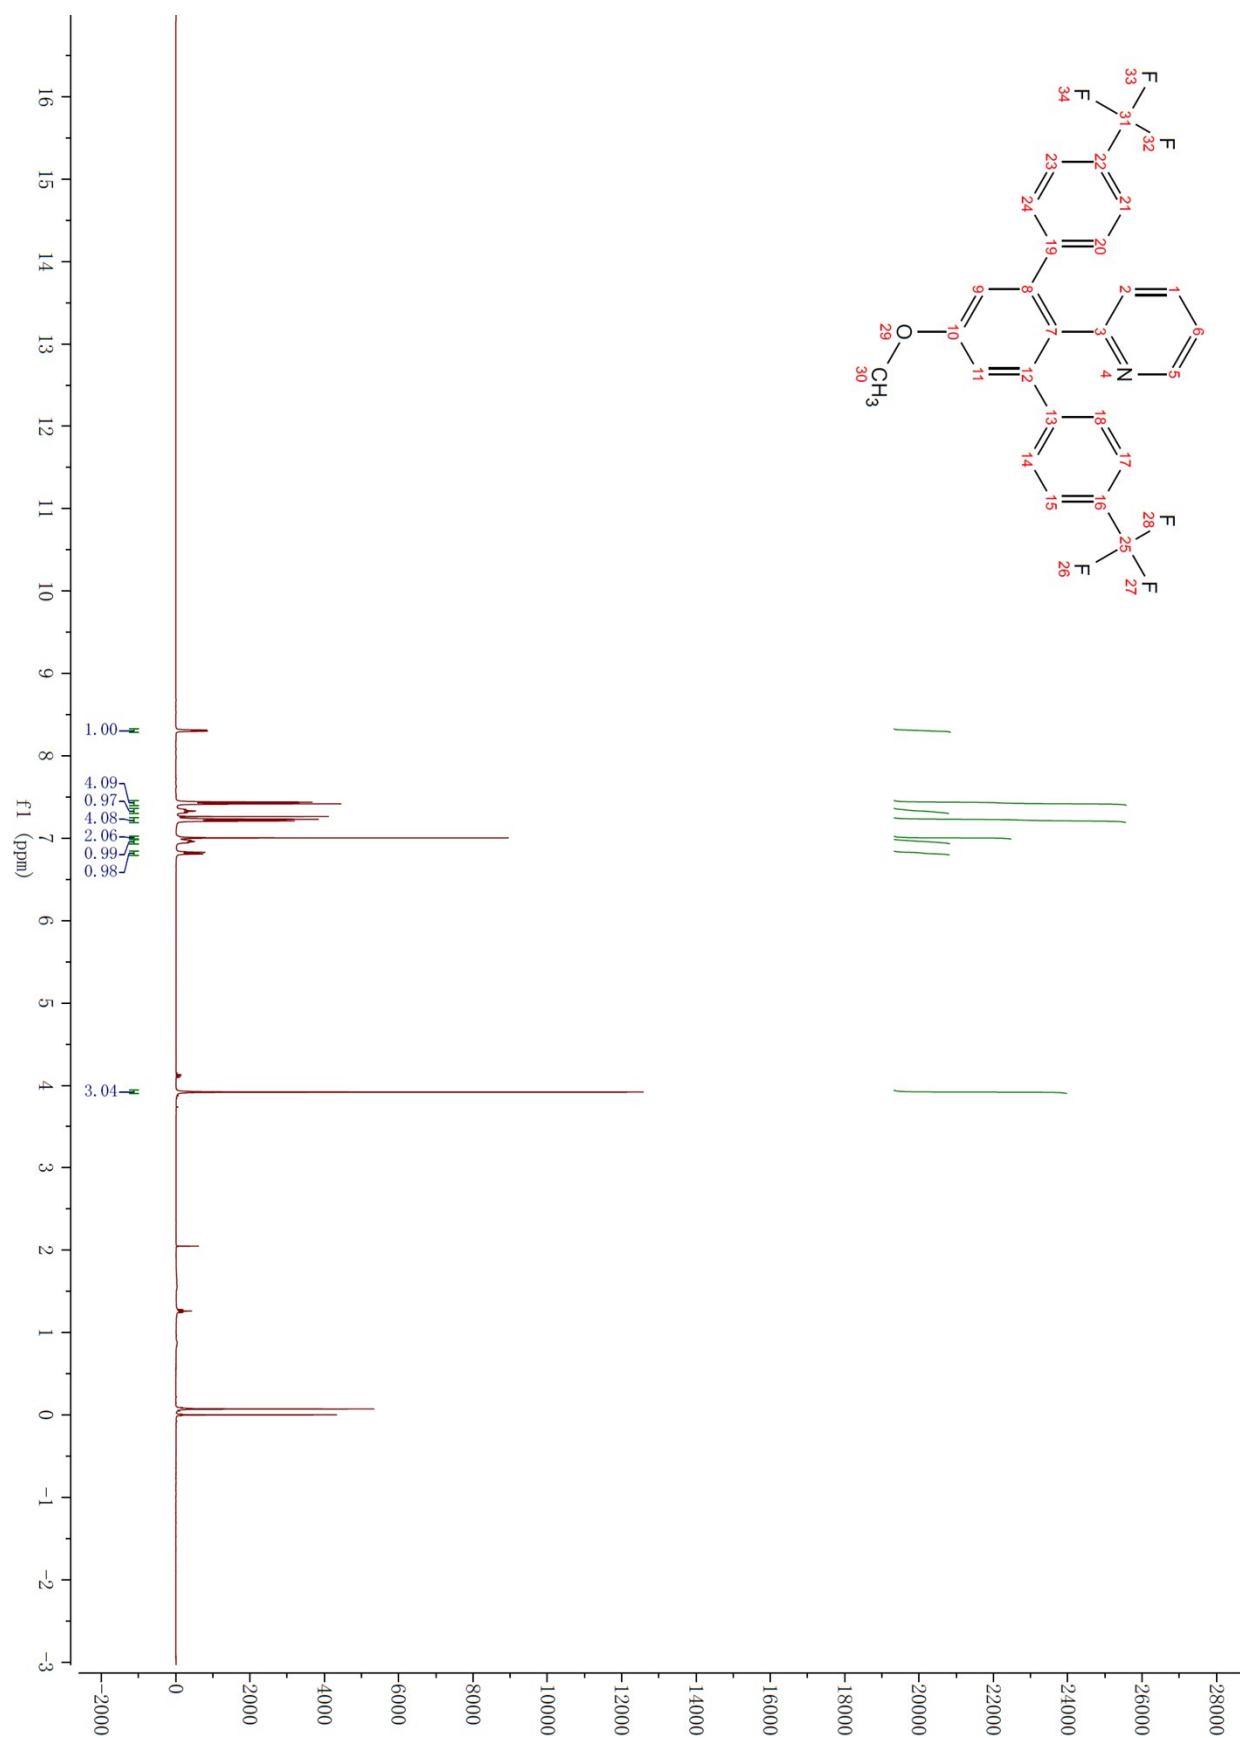

# <sup>13</sup>C NMR Spectrum of the Compound 4dm

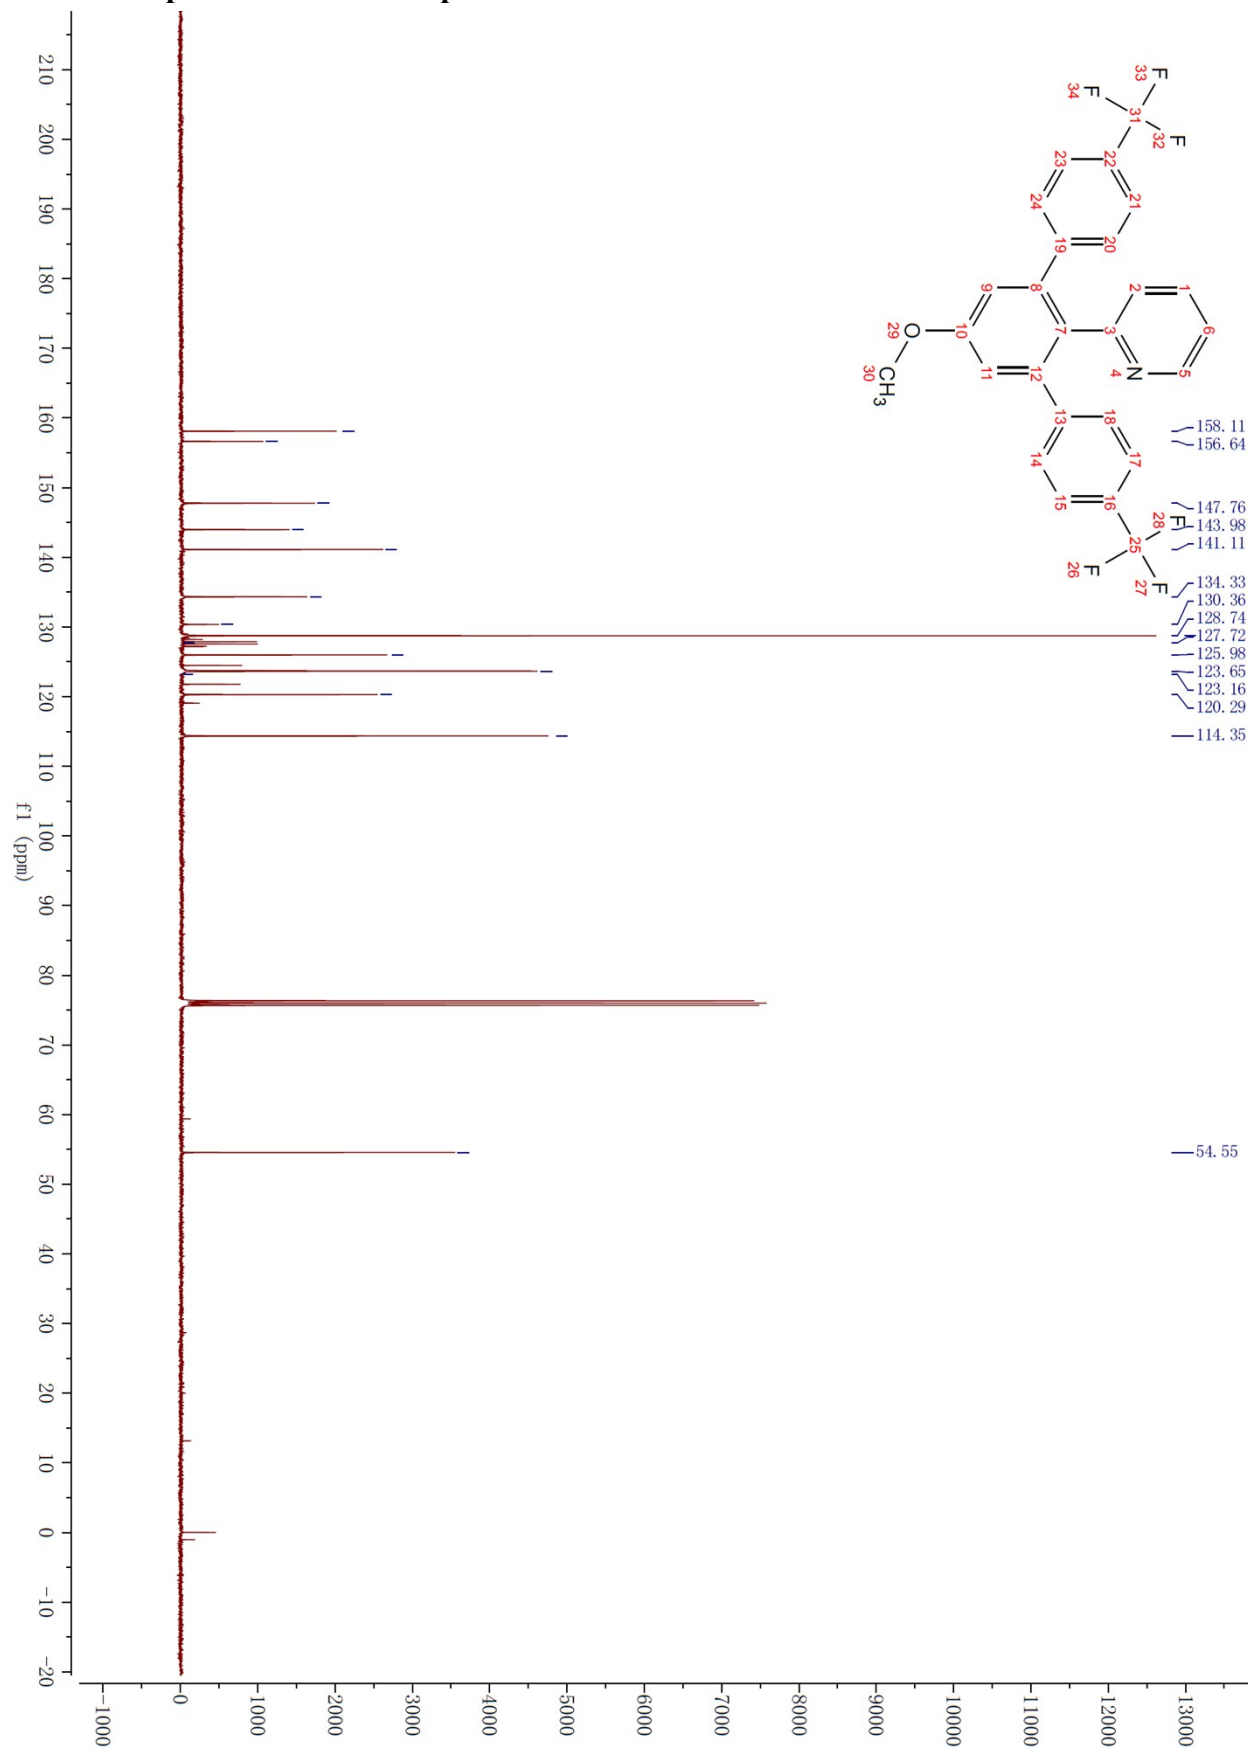

# <sup>1</sup>H NMR Spectrum of the Compound 3em

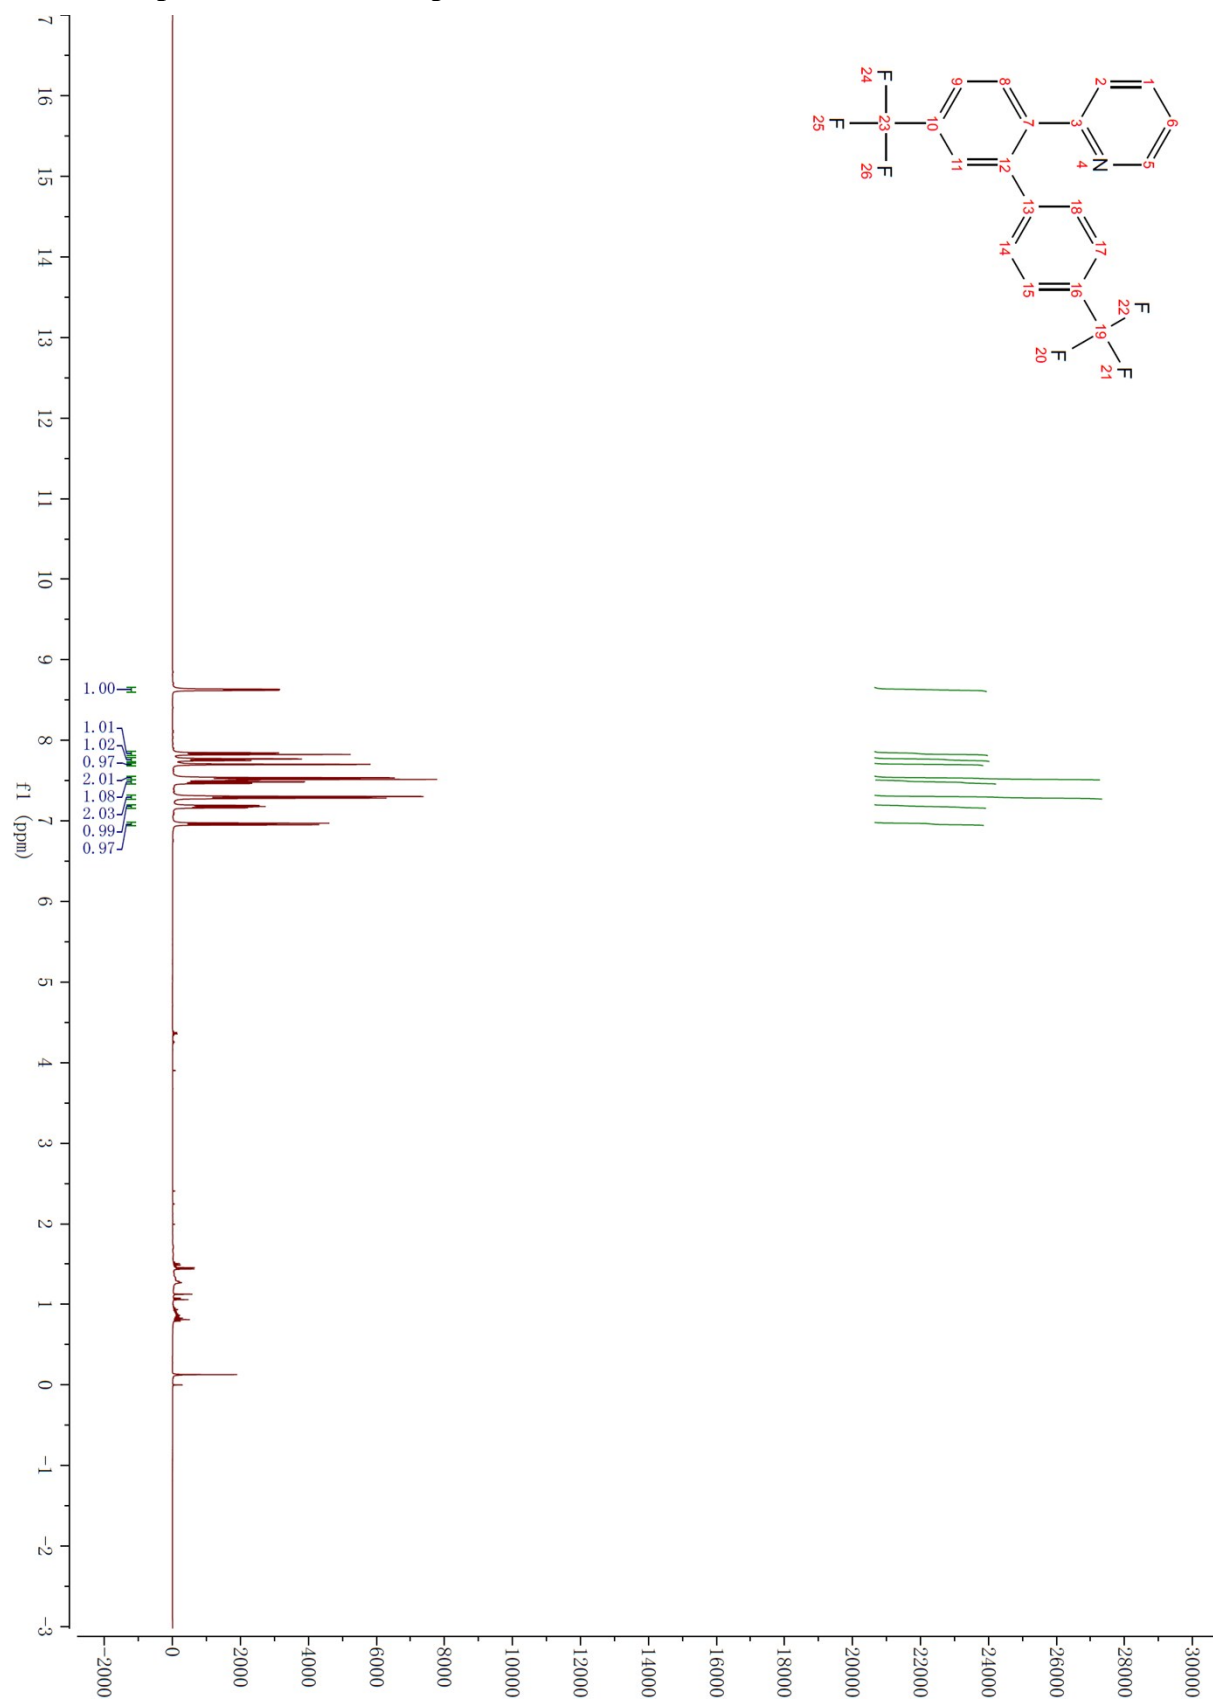

# <sup>13</sup>C NMR Spectrum of the Compound 3em

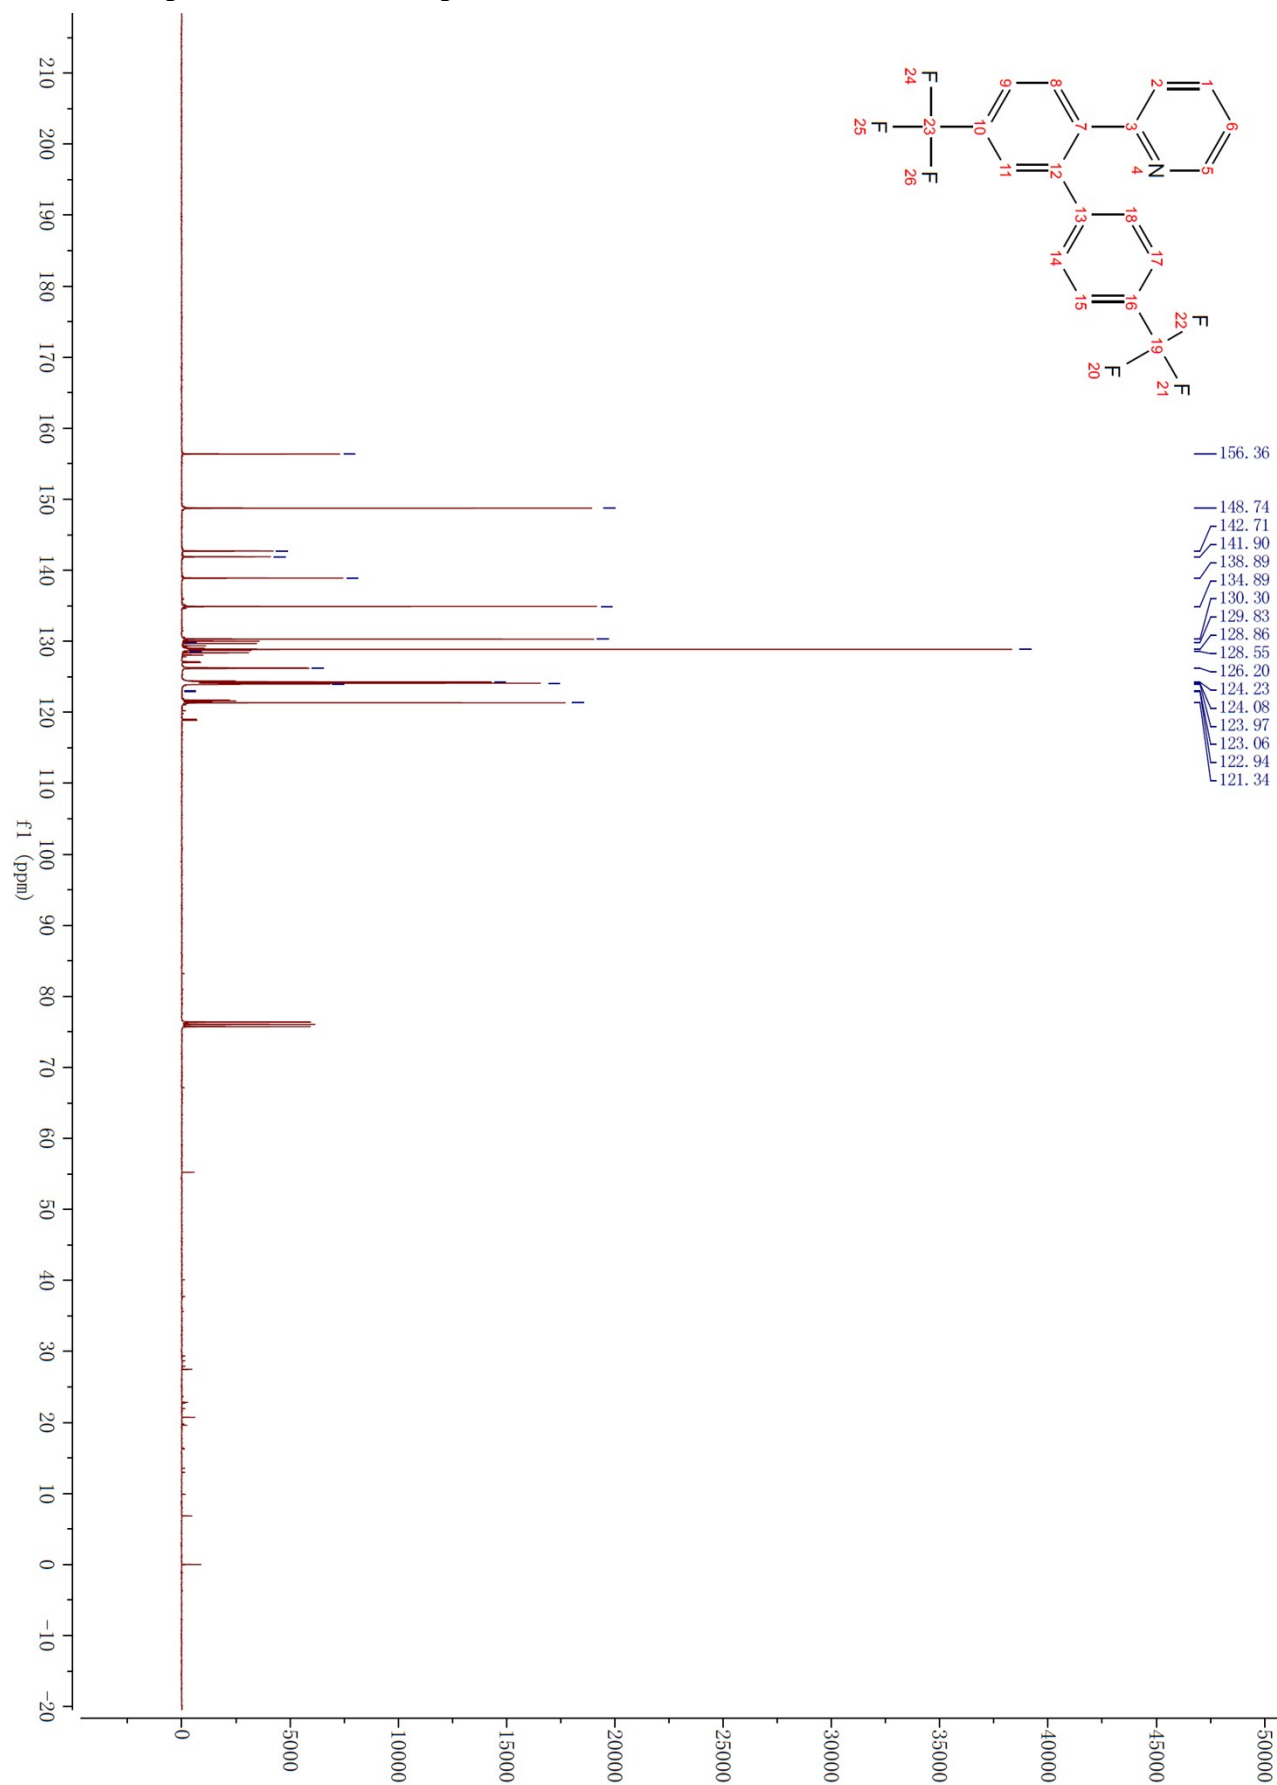

# <sup>1</sup>H NMR Spectrum of the Compound 4em

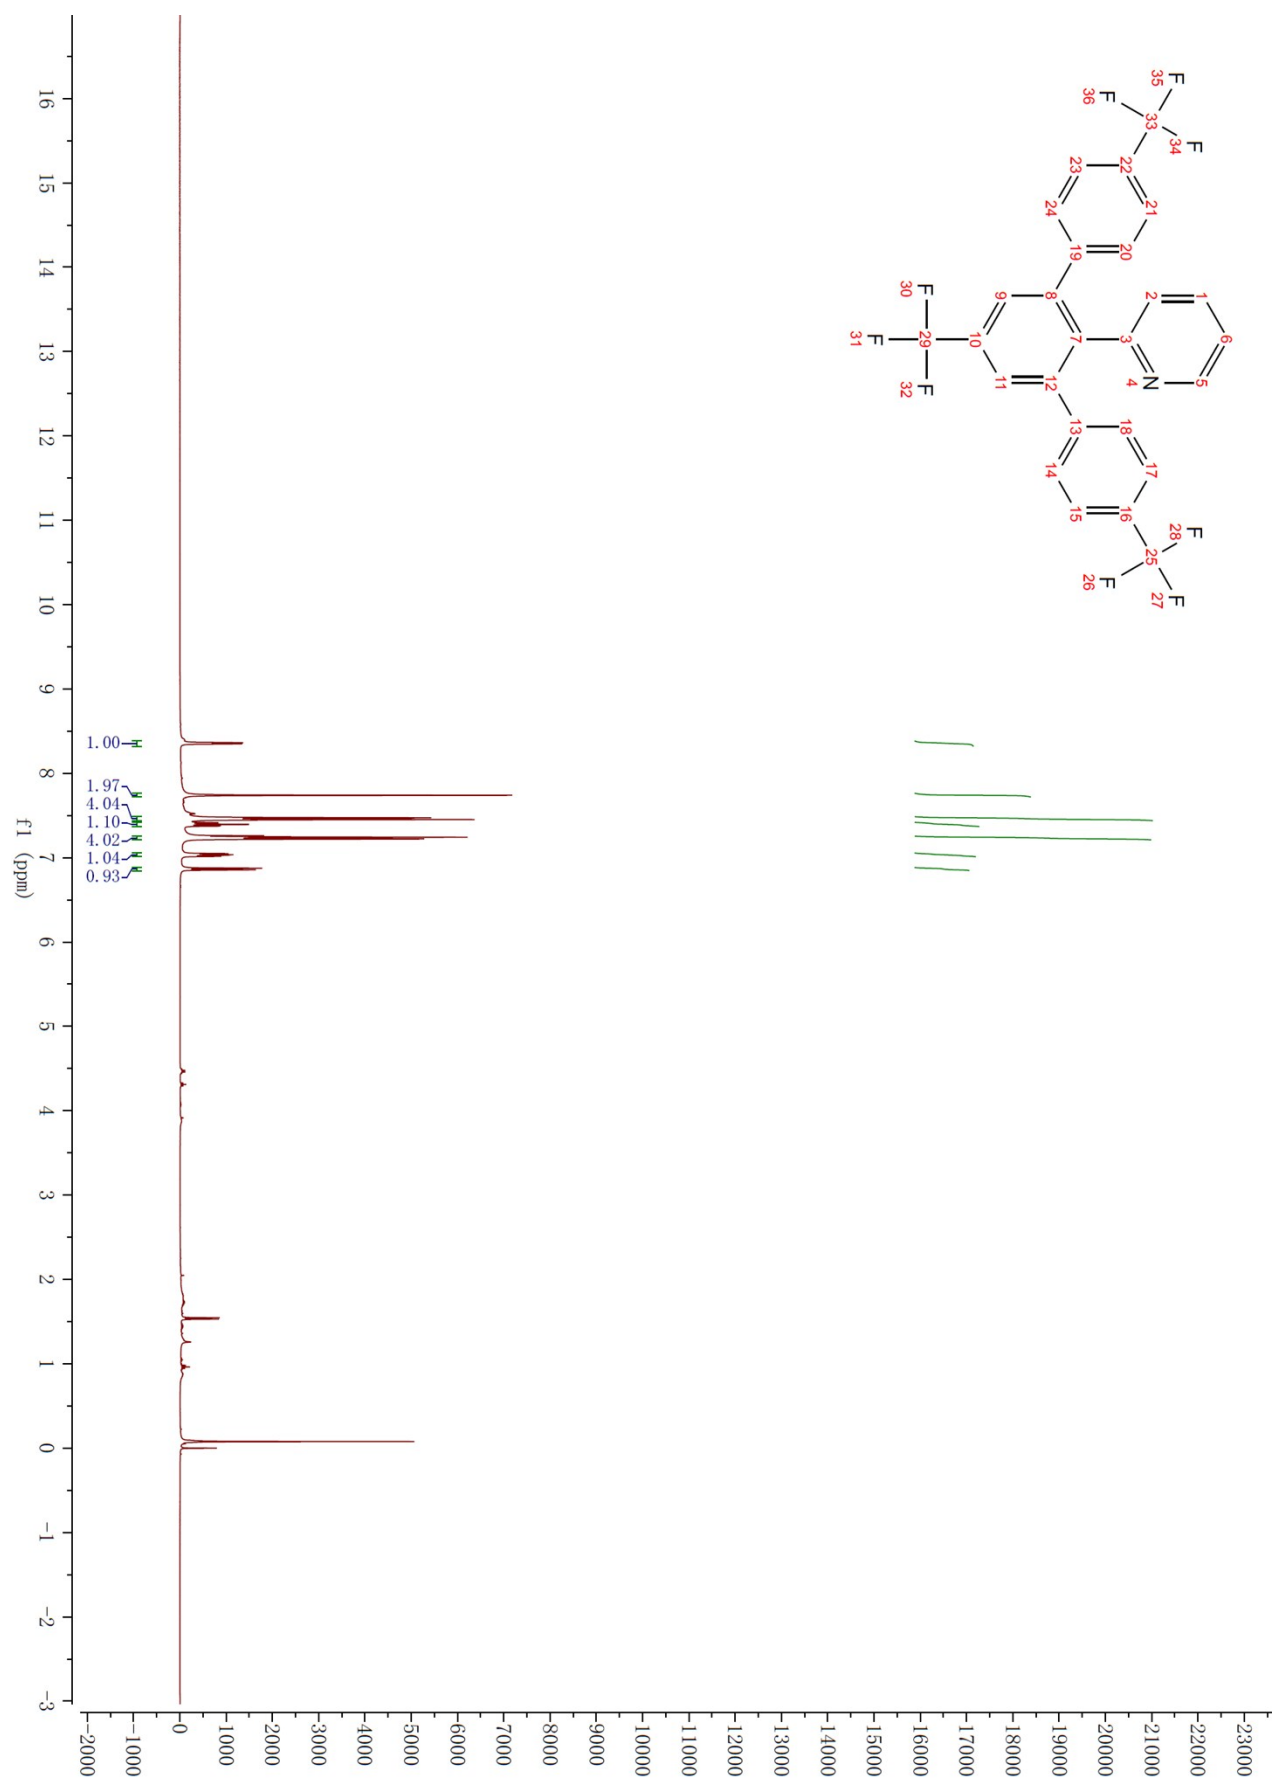



# <sup>13</sup>C NMR Spectrum of the Compound 4em

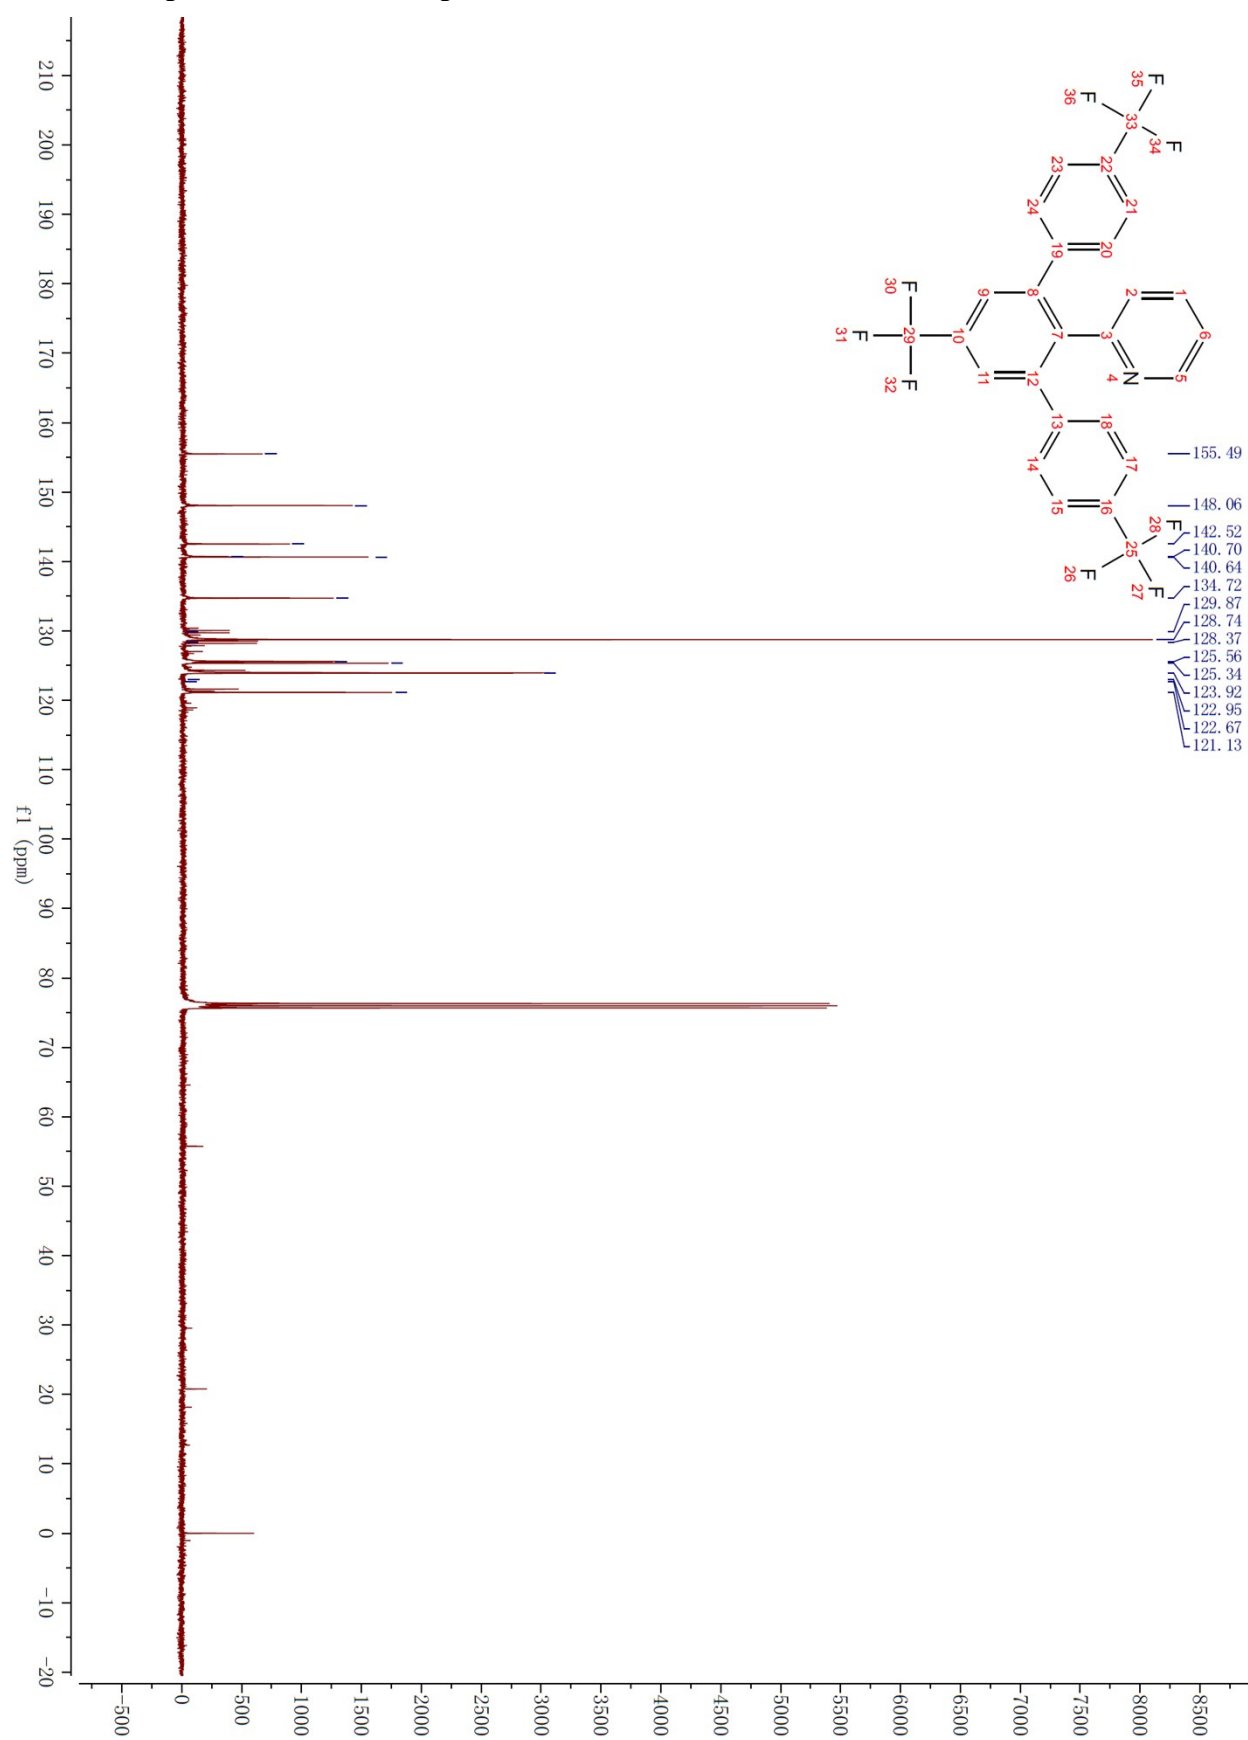

# <sup>1</sup>H NMR Spectrum of the Compound 3cm

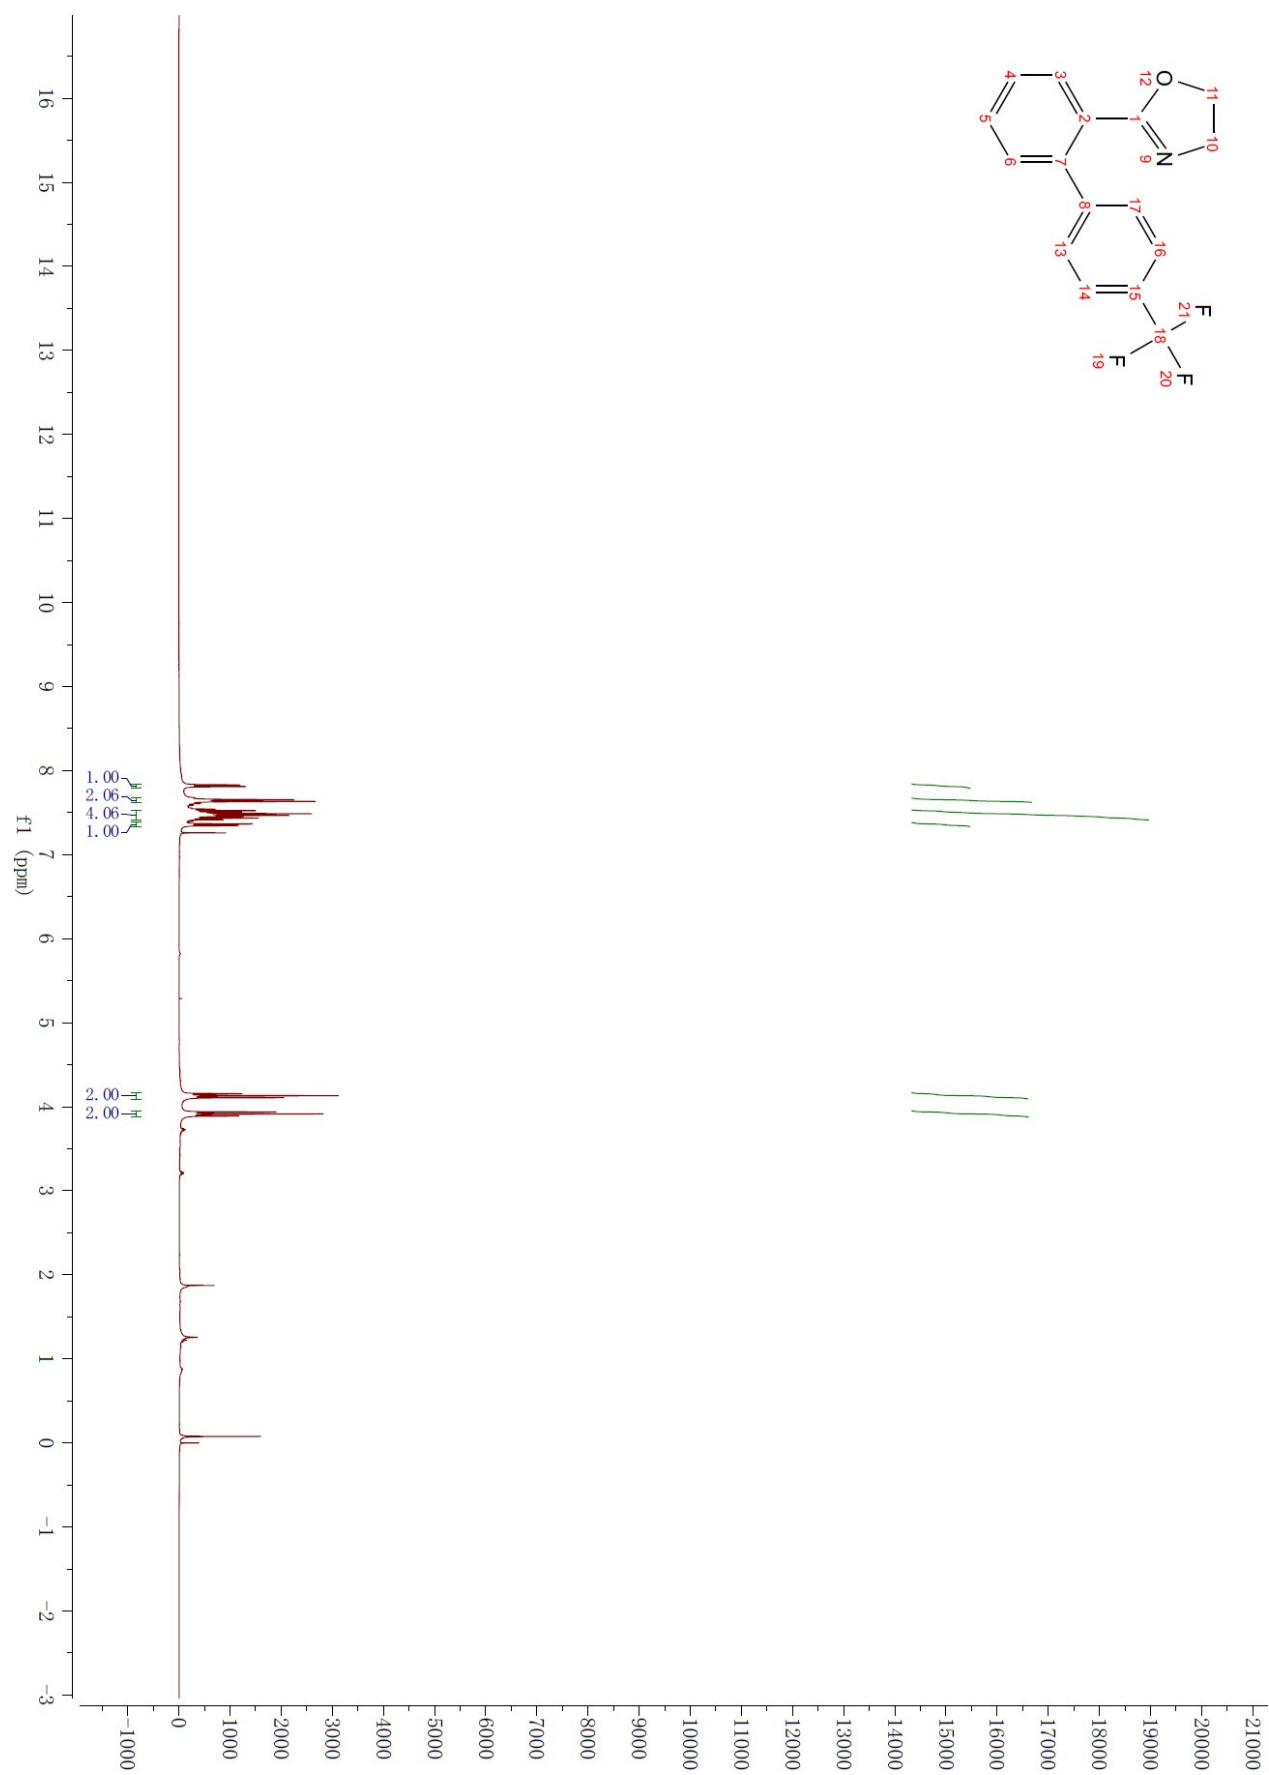

# <sup>13</sup>C NMR Spectrum of the Compound 3cm

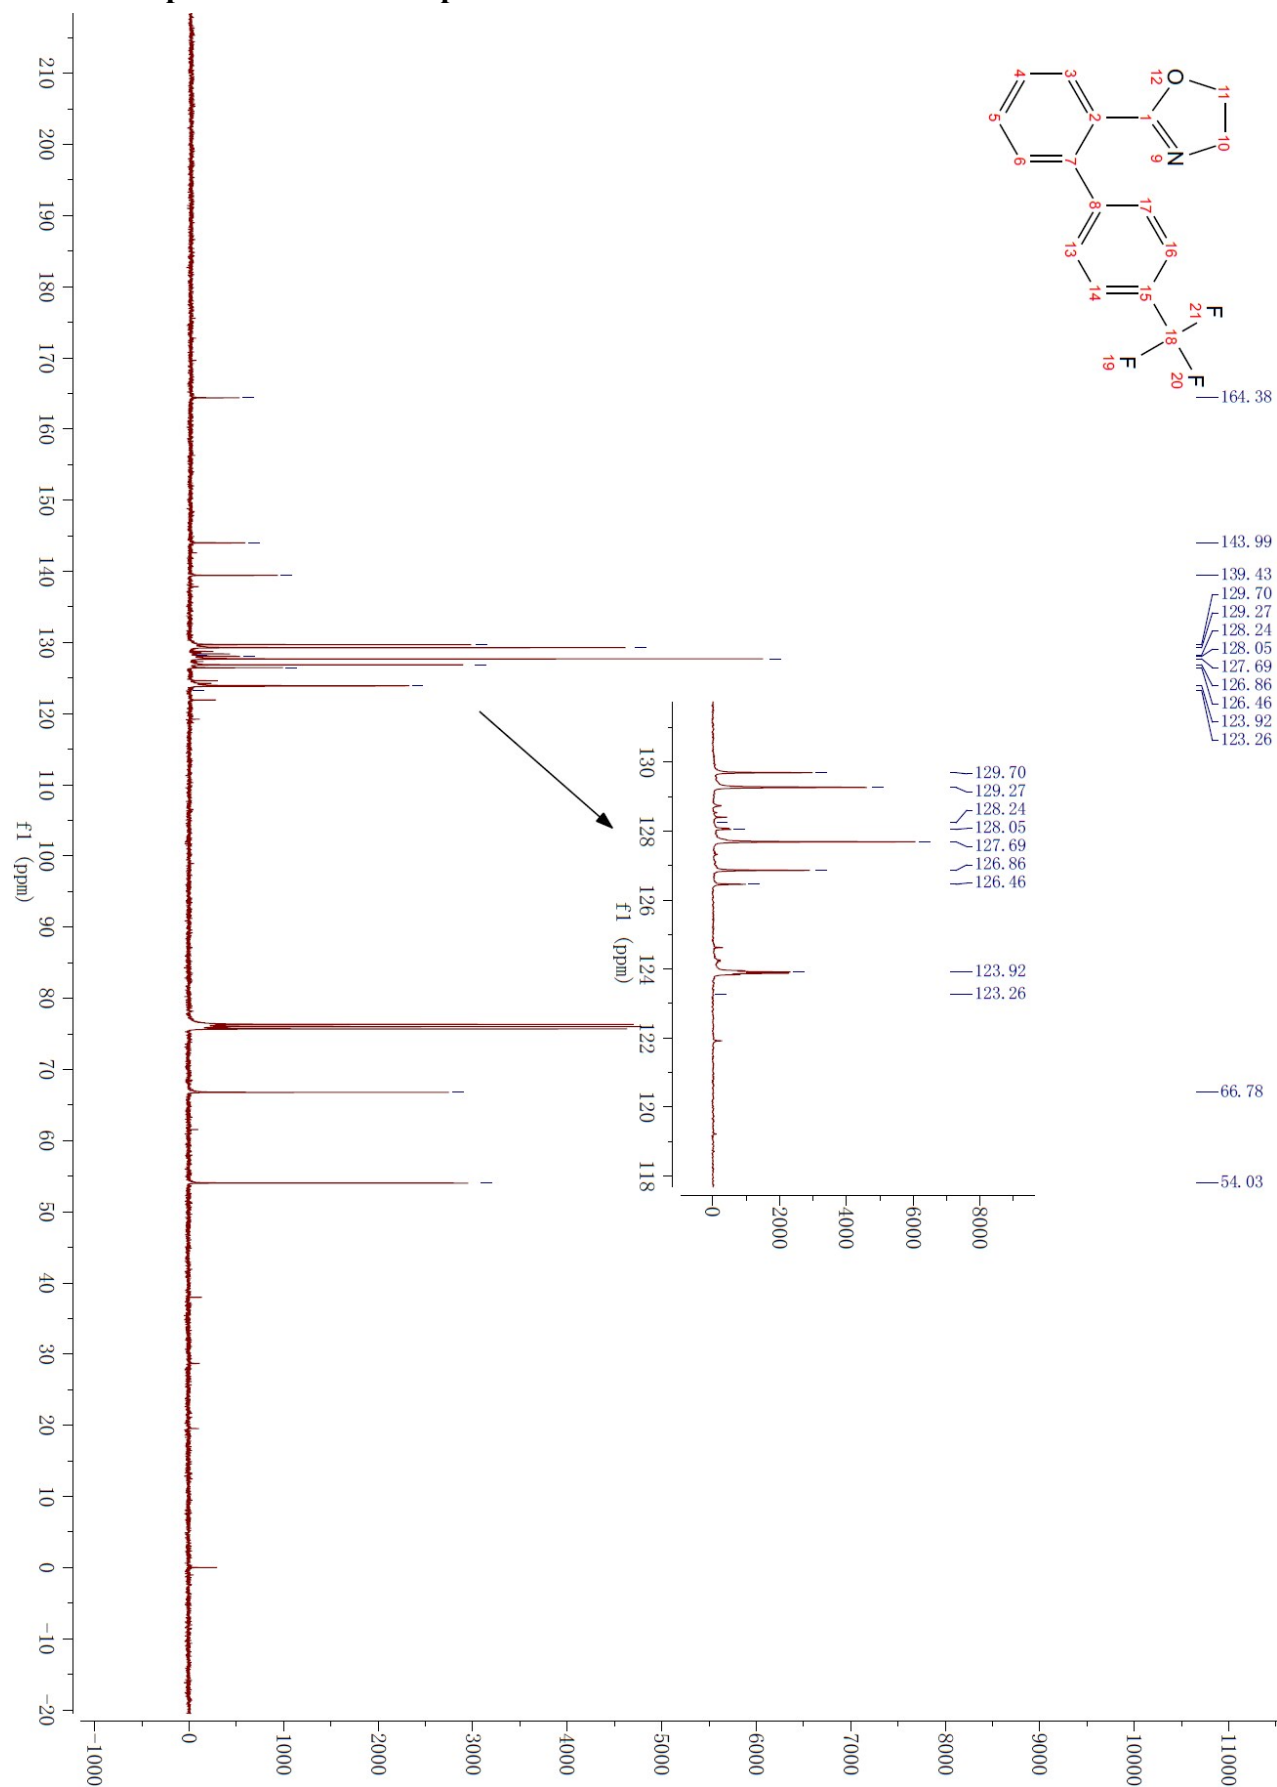

# <sup>1</sup>H NMR Spectrum of the Compound 4cm

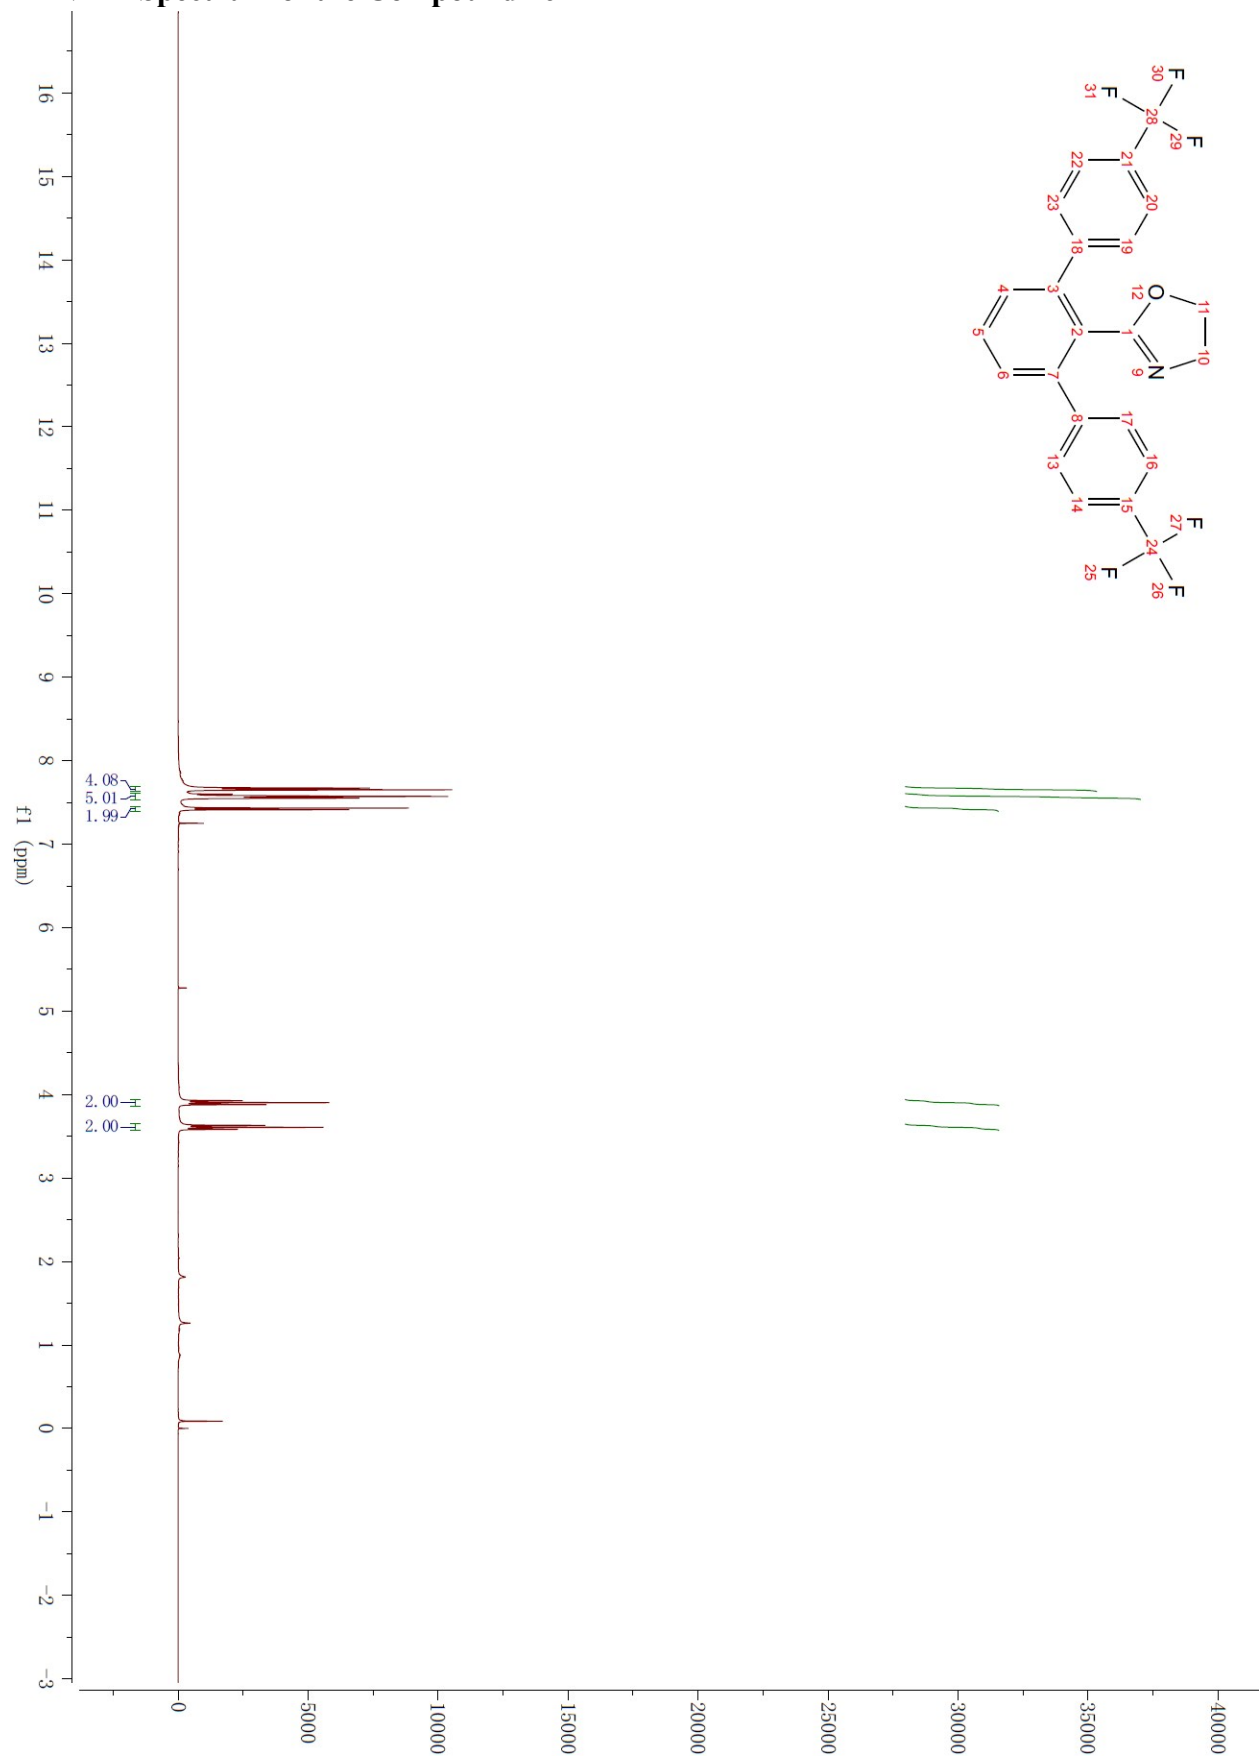

# <sup>13</sup>C NMR Spectrum of the Compound 4cm

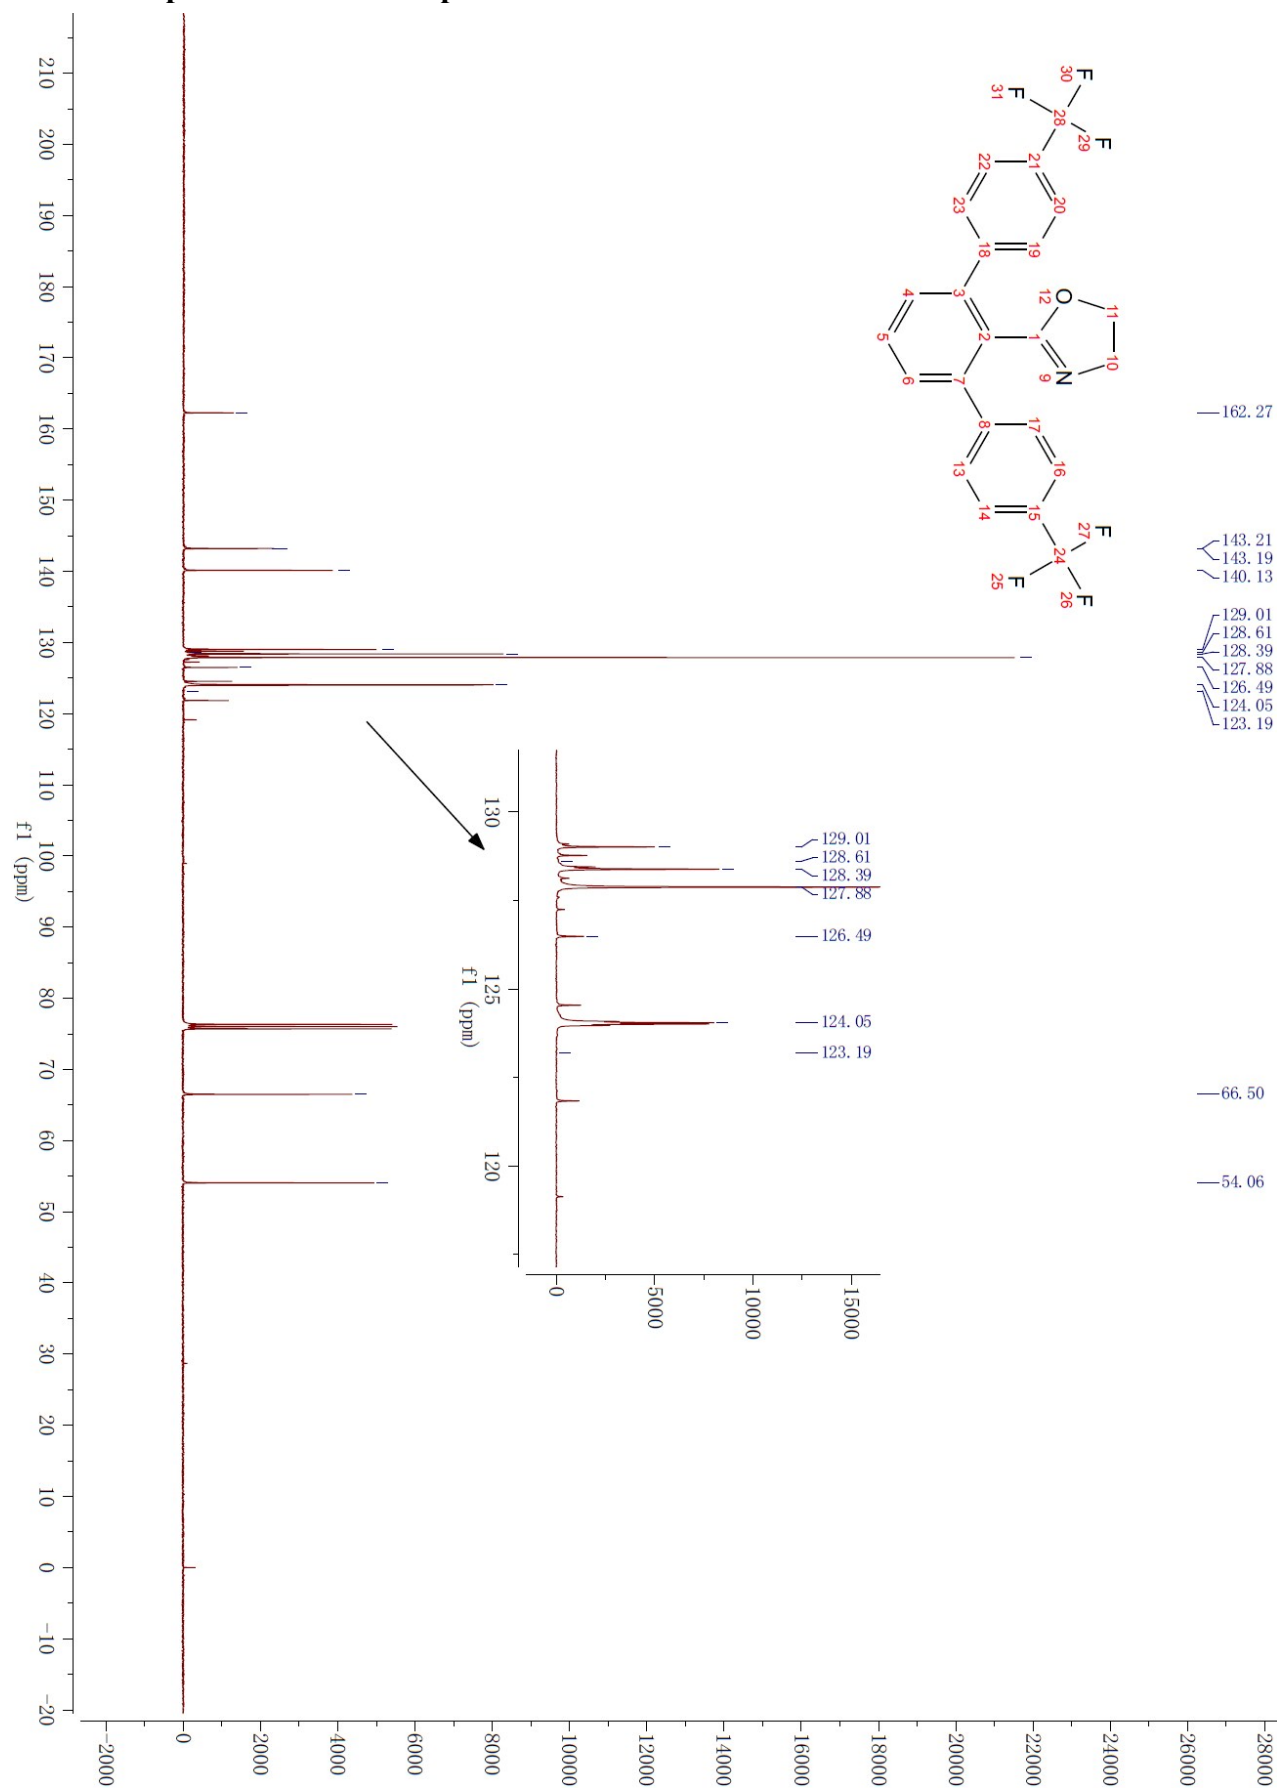

# <sup>1</sup>H NMR Spectrum of the Compound 8

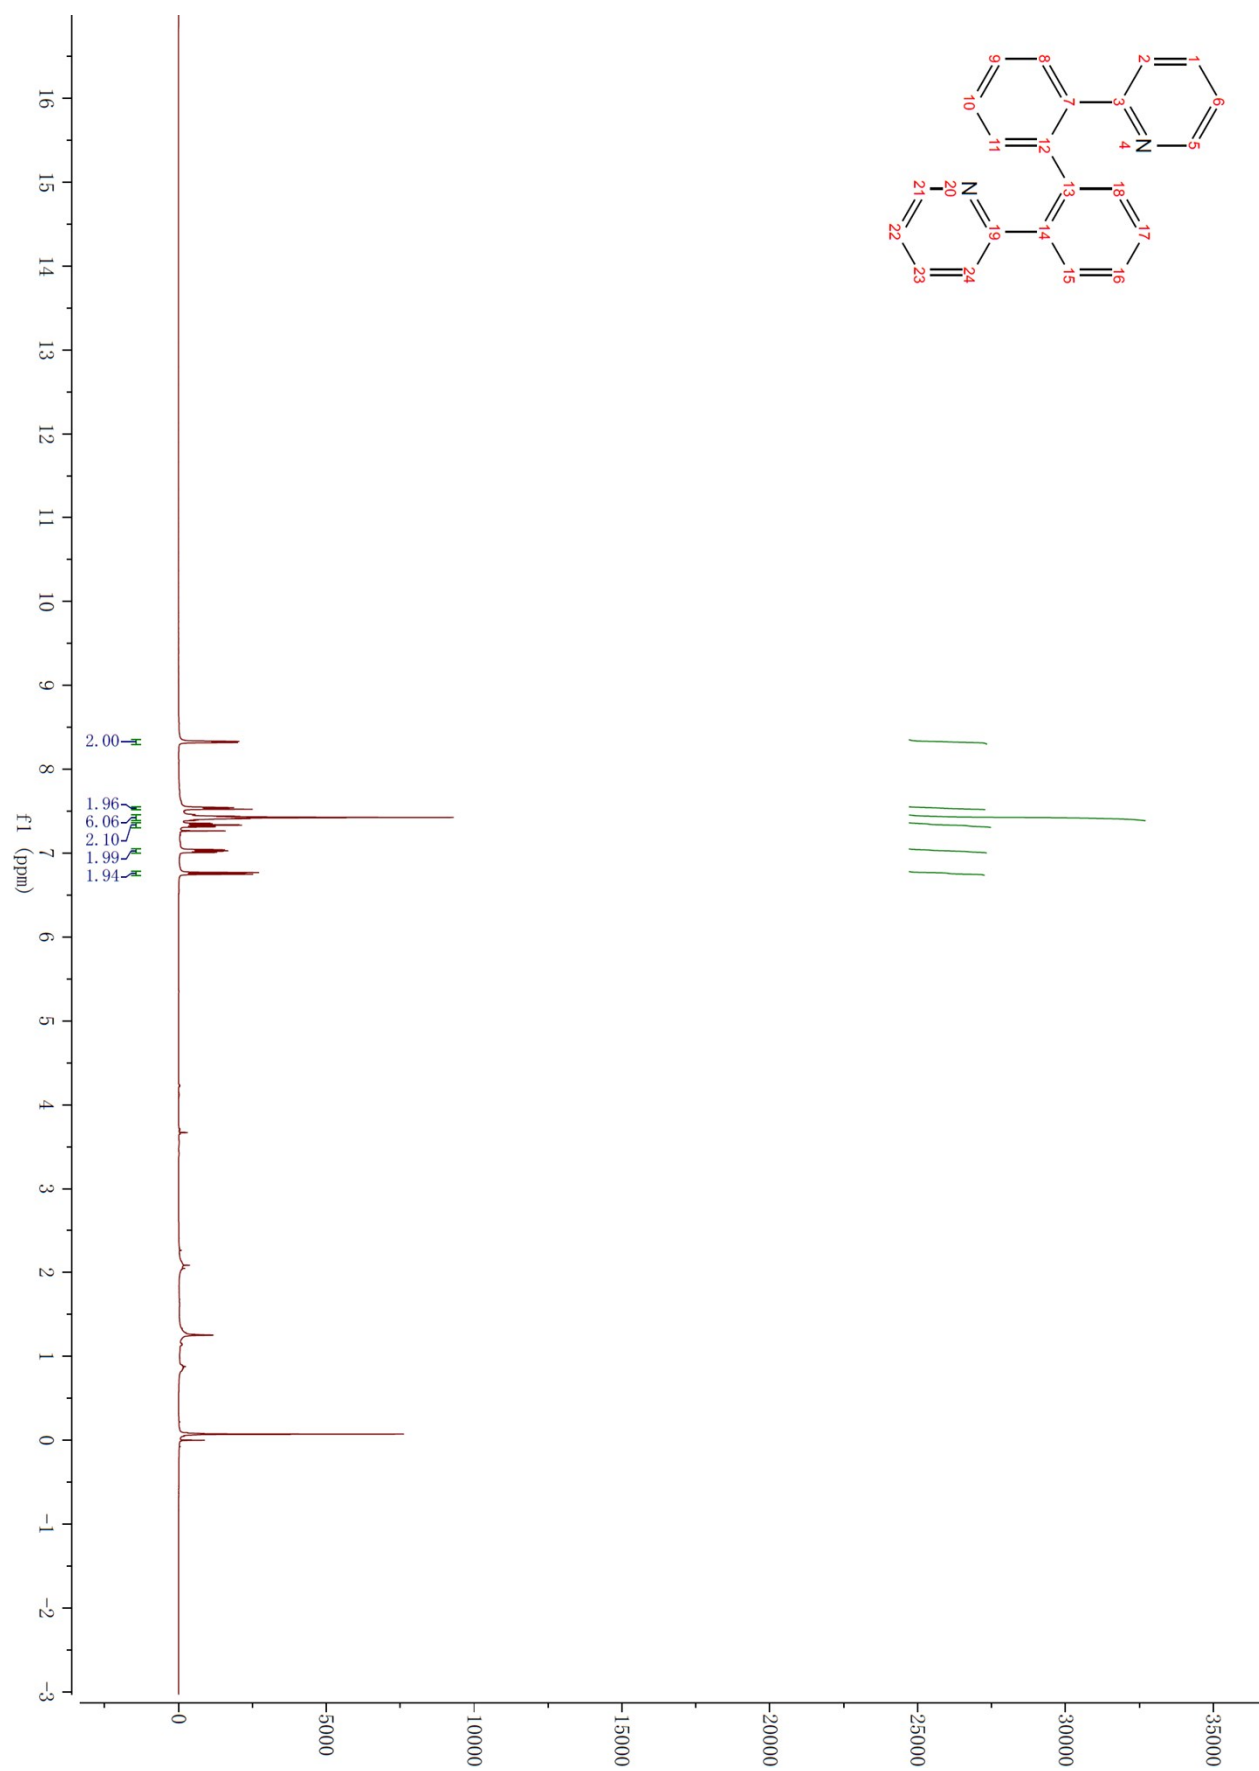

# <sup>13</sup>C NMR Spectrum of the Compound 8

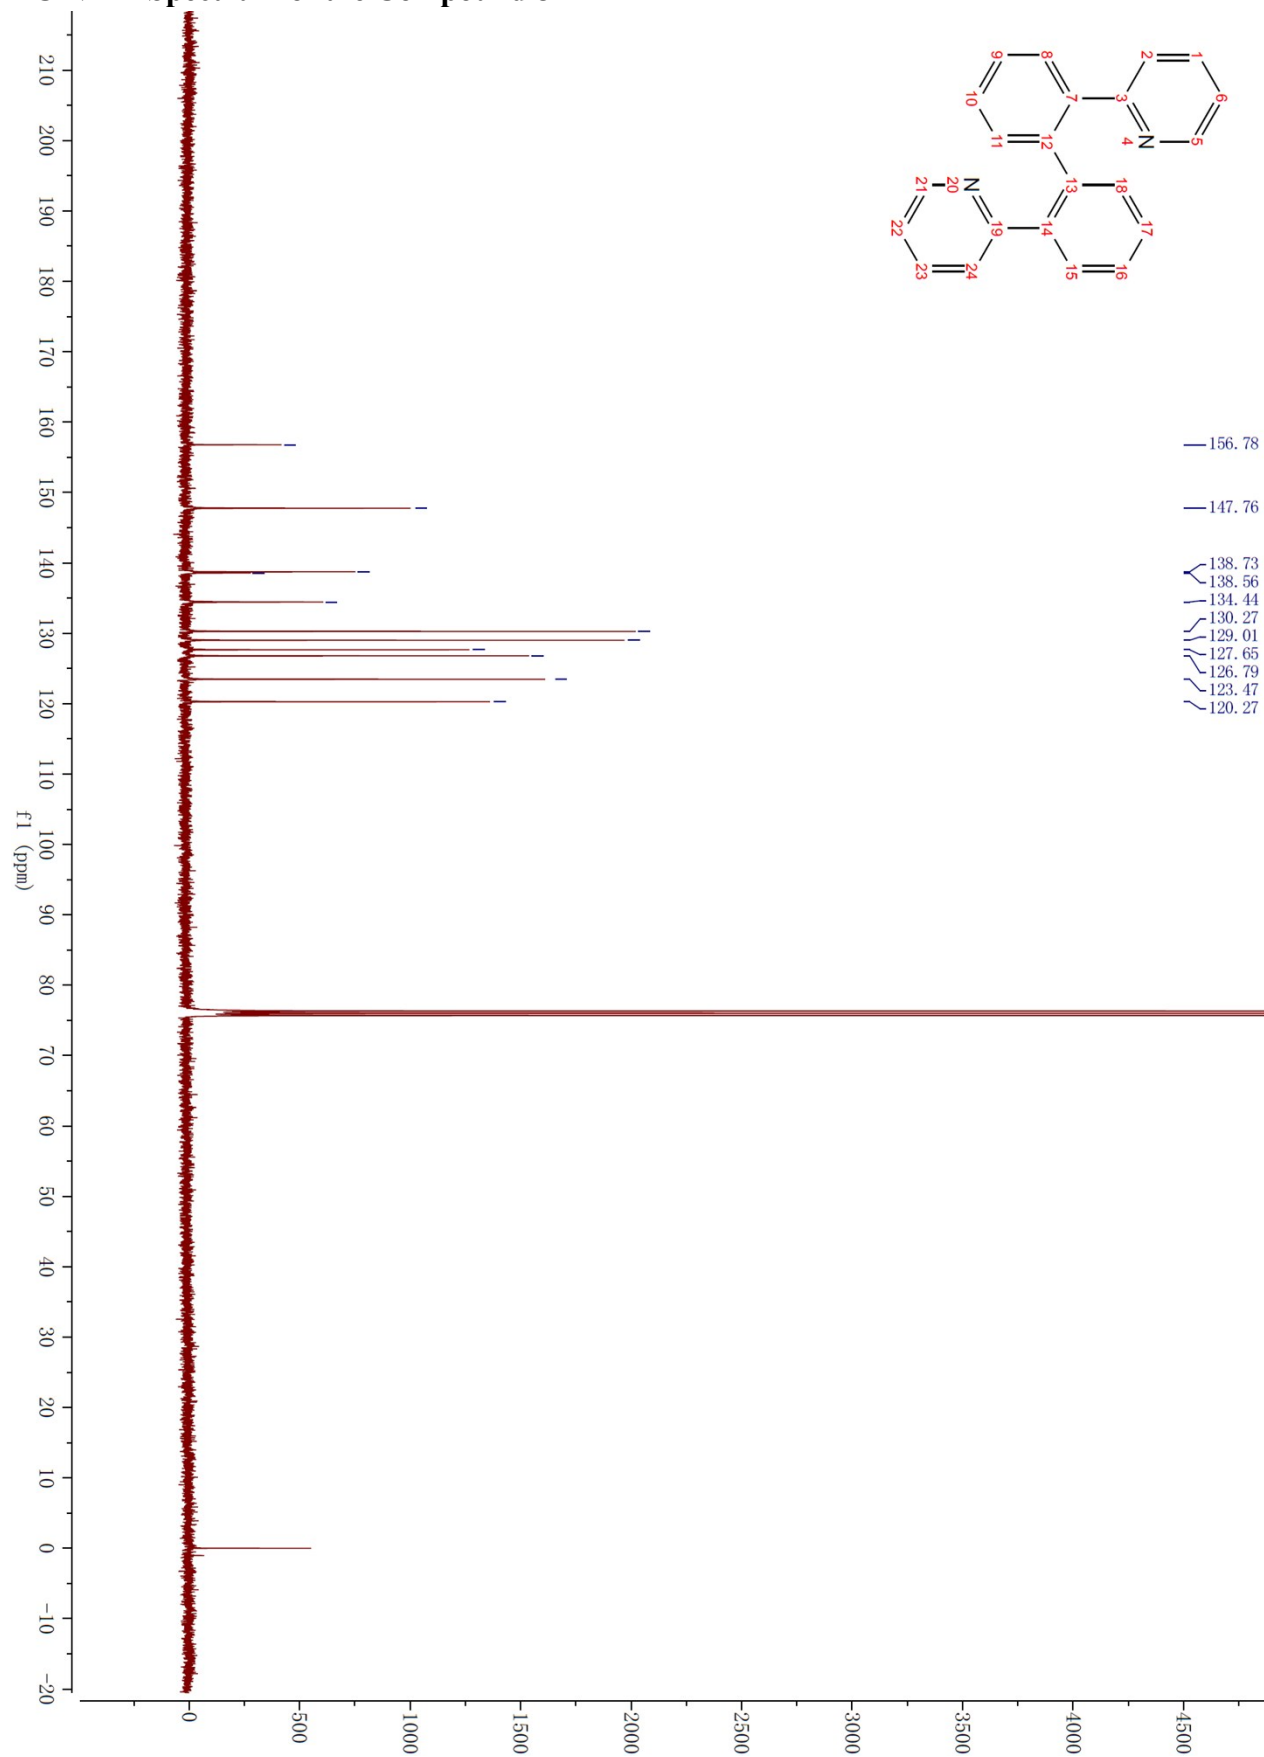

# <sup>1</sup>H NMR Spectrum of the Compound 4ab

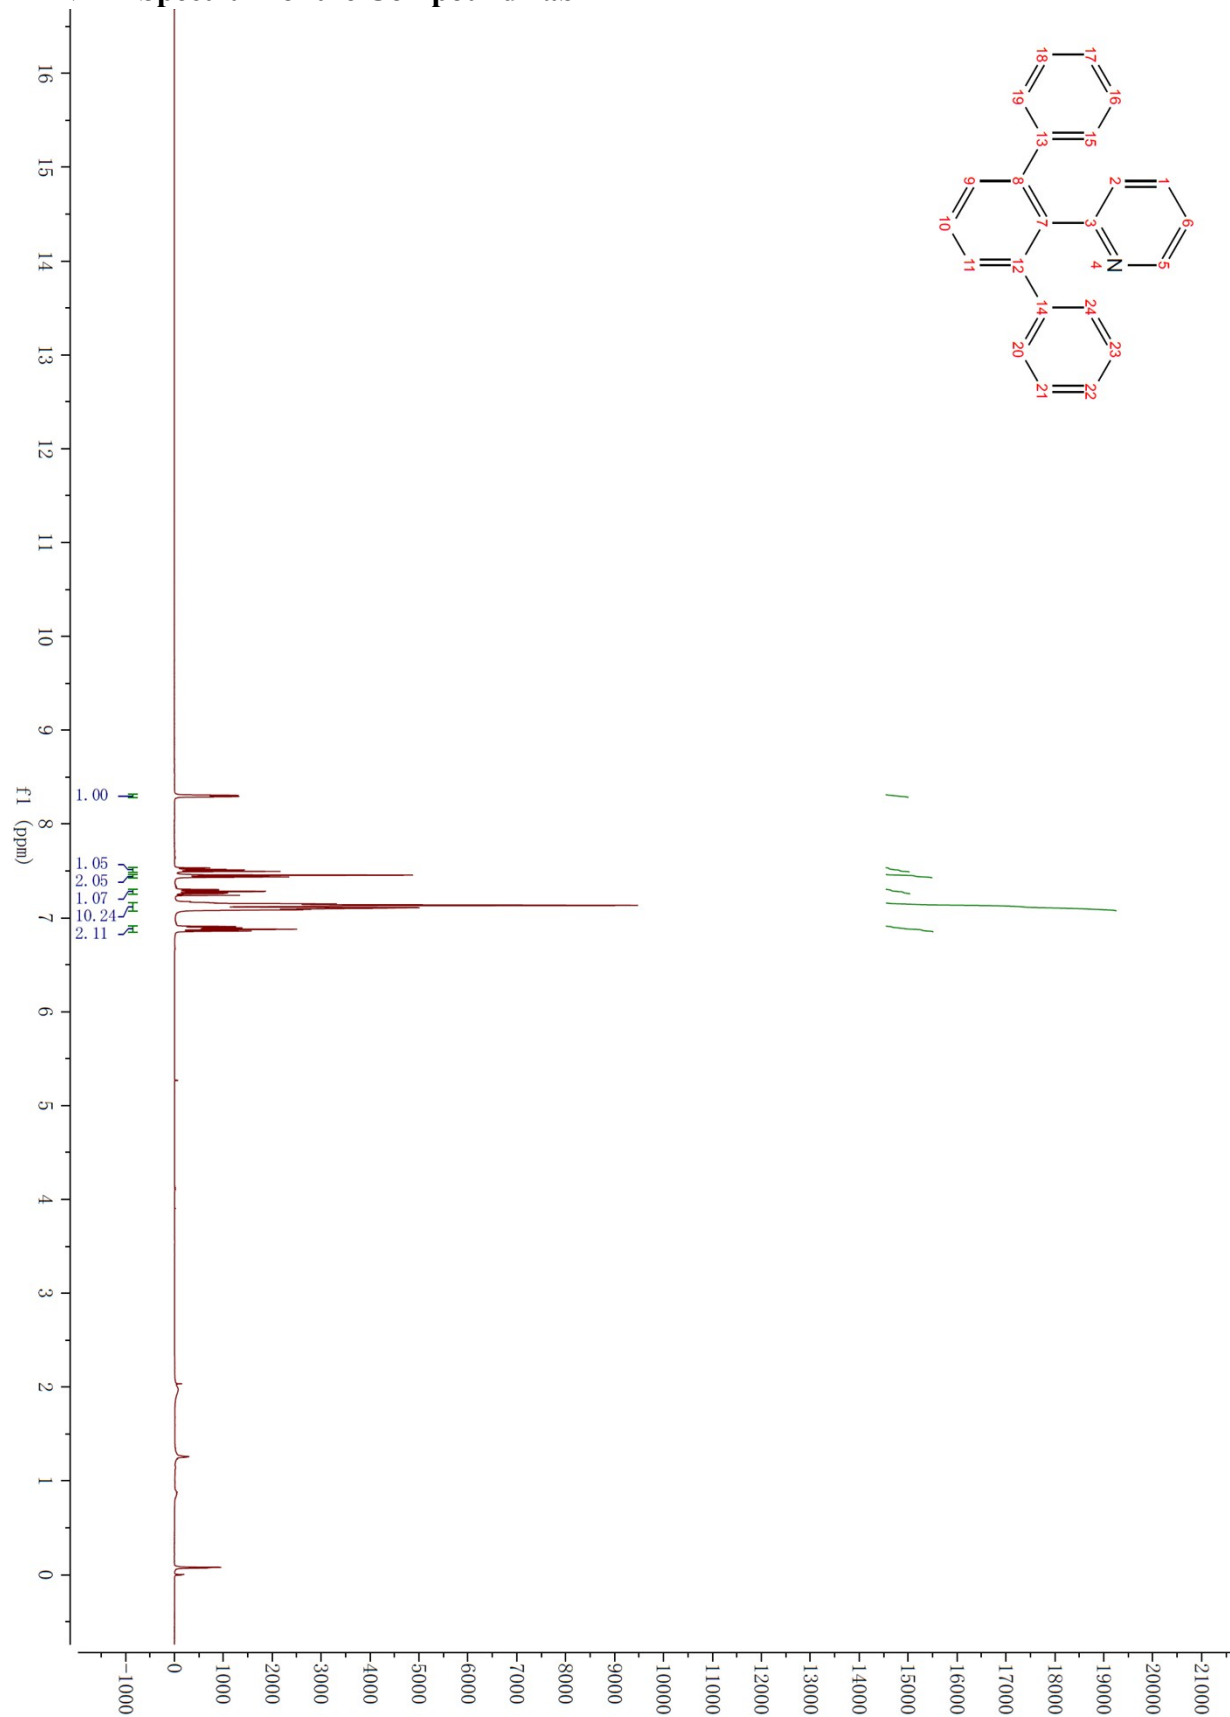



# <sup>13</sup>C NMR Spectrum of the Compound 4ab

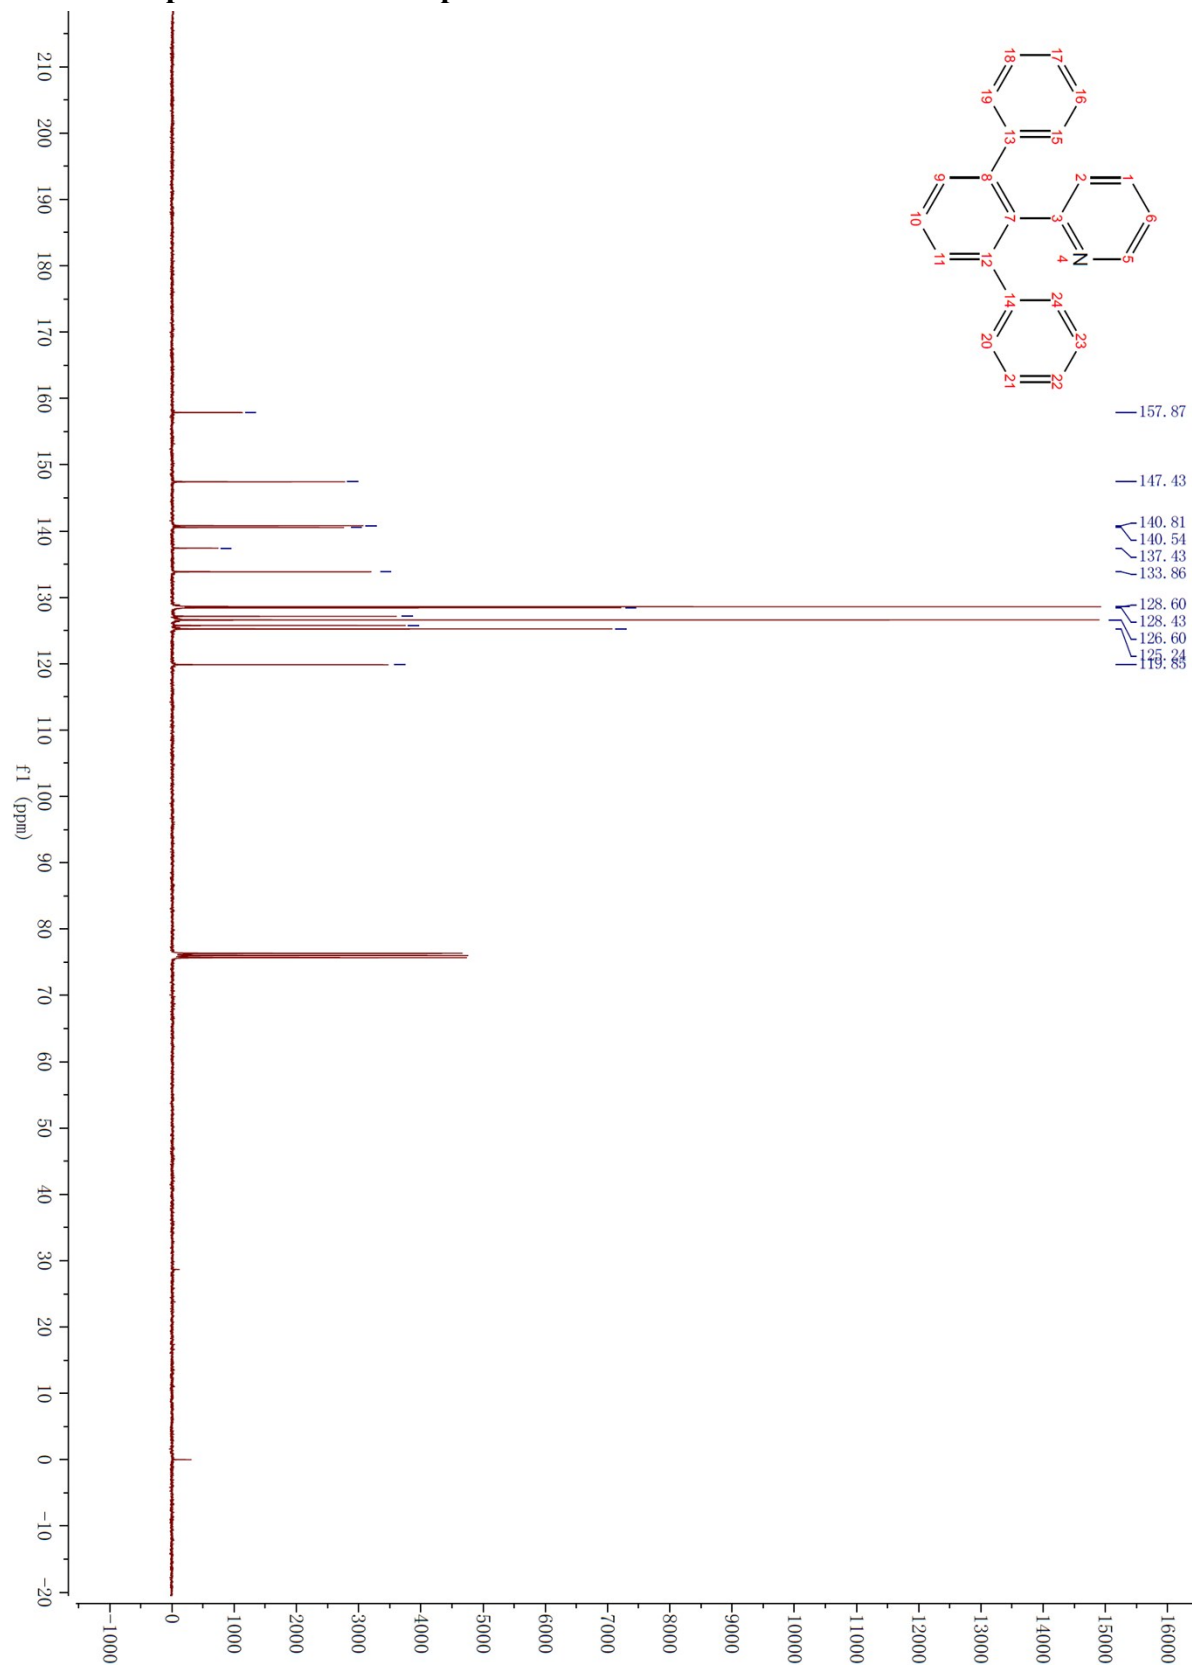

# <sup>1</sup>H NMR Spectrum of the Compound 3ab

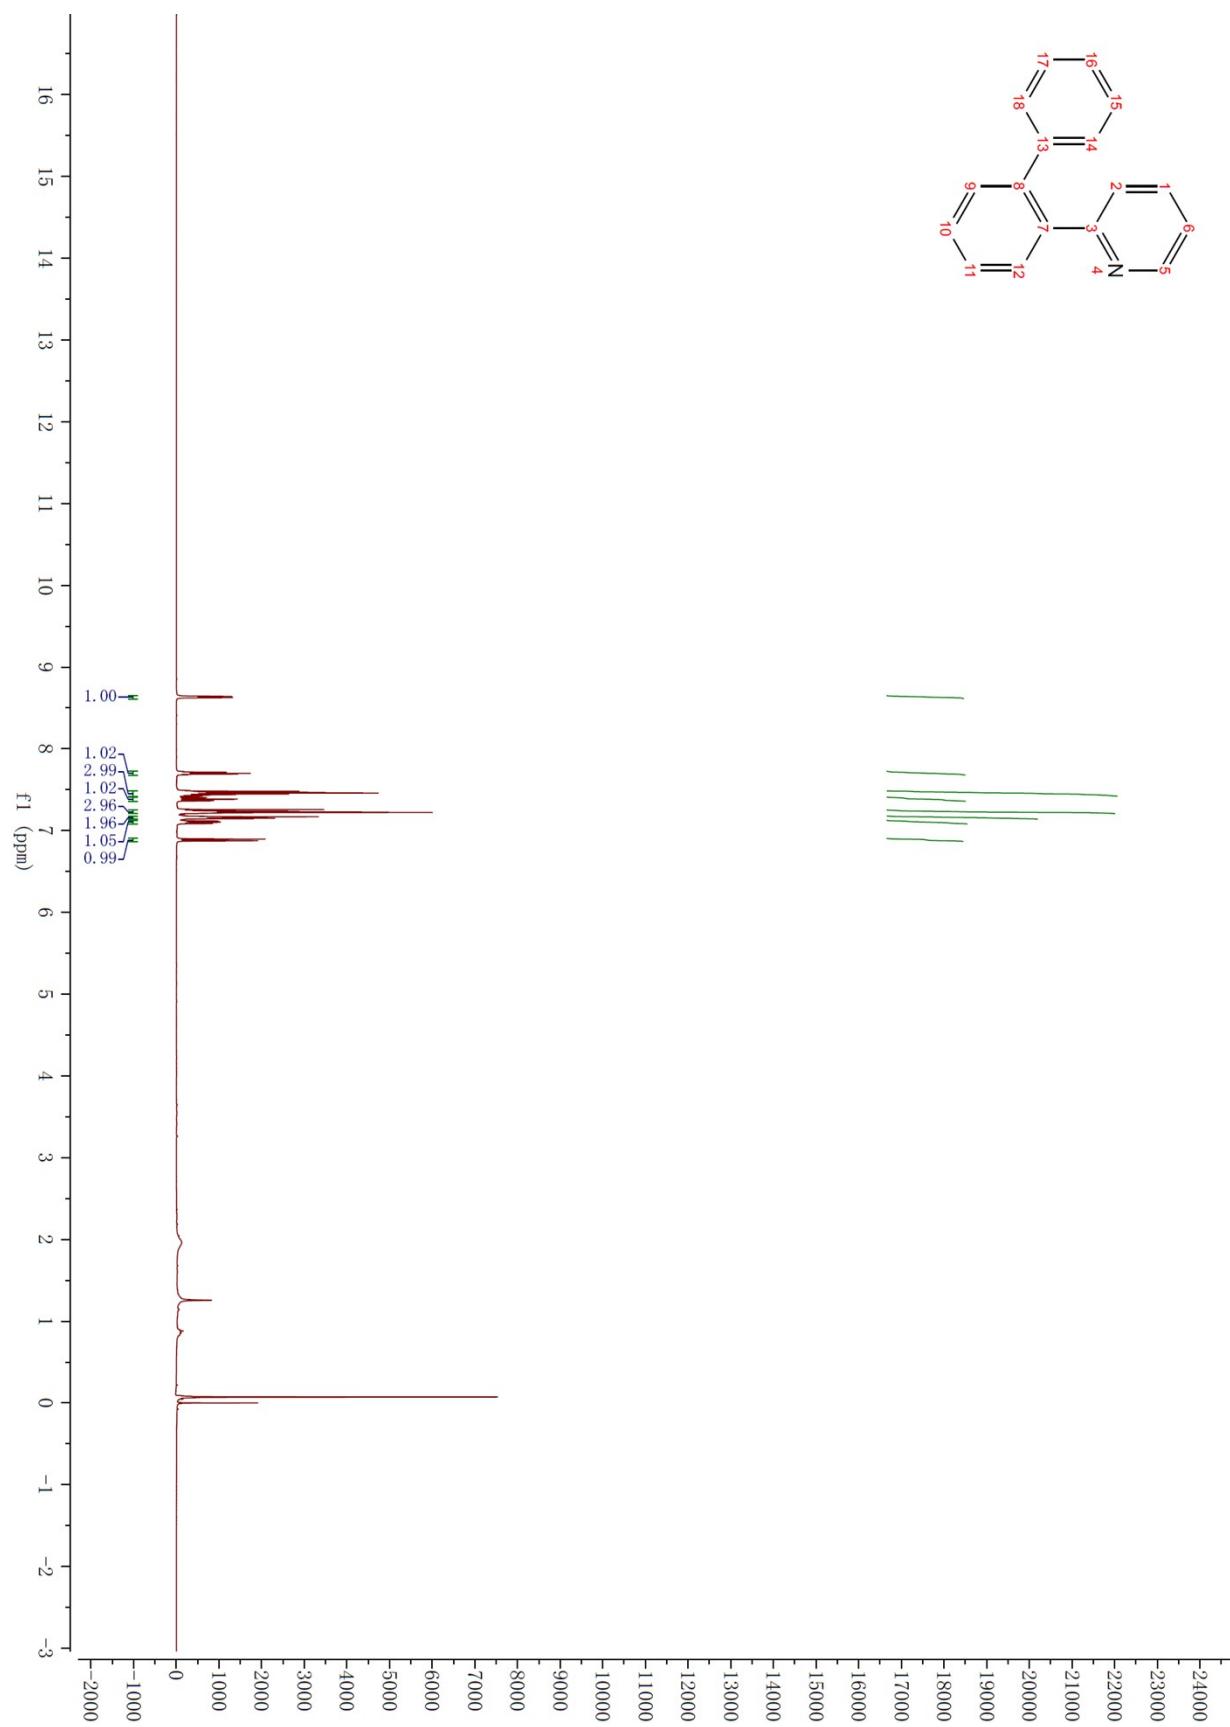

# <sup>13</sup>C NMR Spectrum of the Compound 3ab

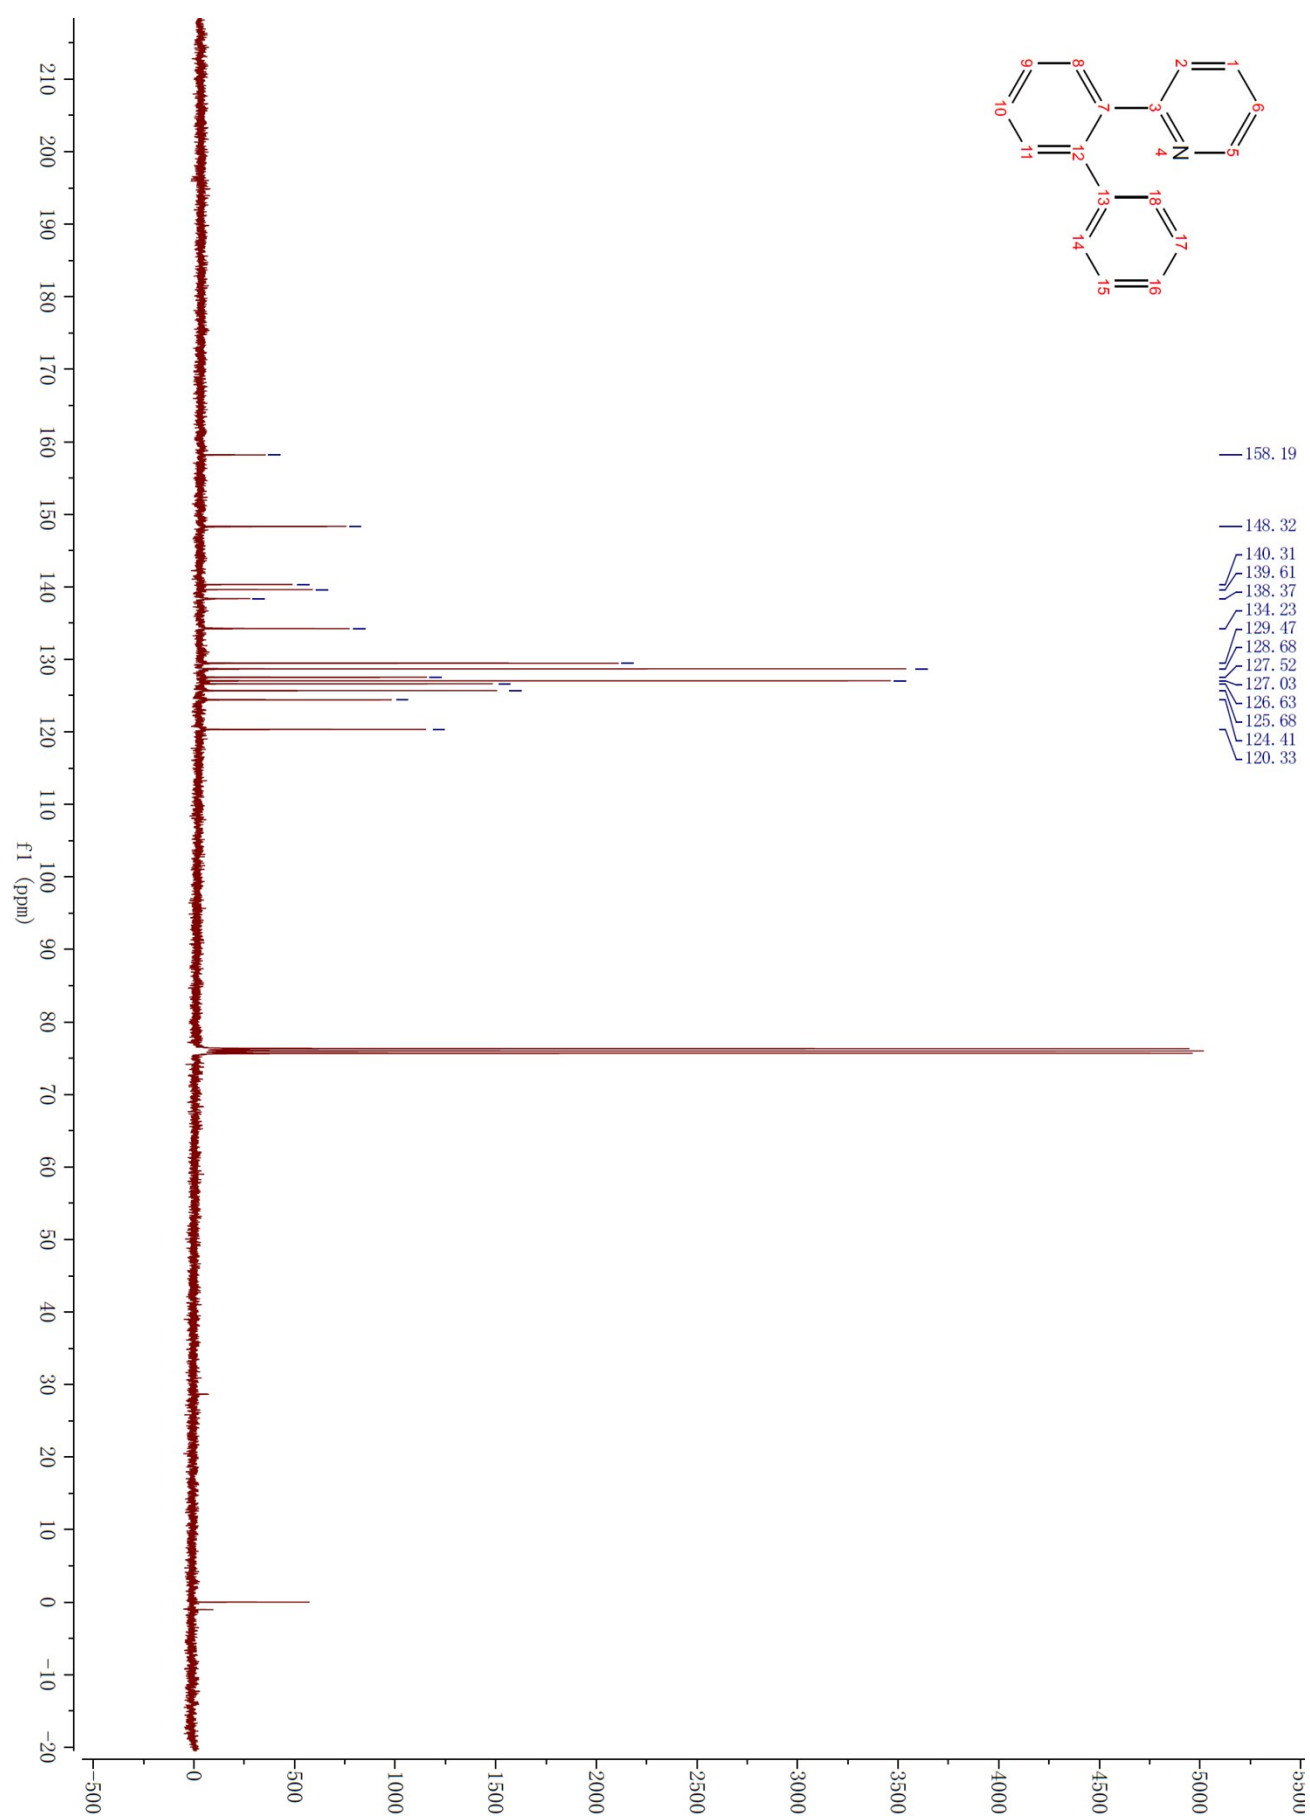

# <sup>1</sup>H NMR Spectrum of the Compound 3au

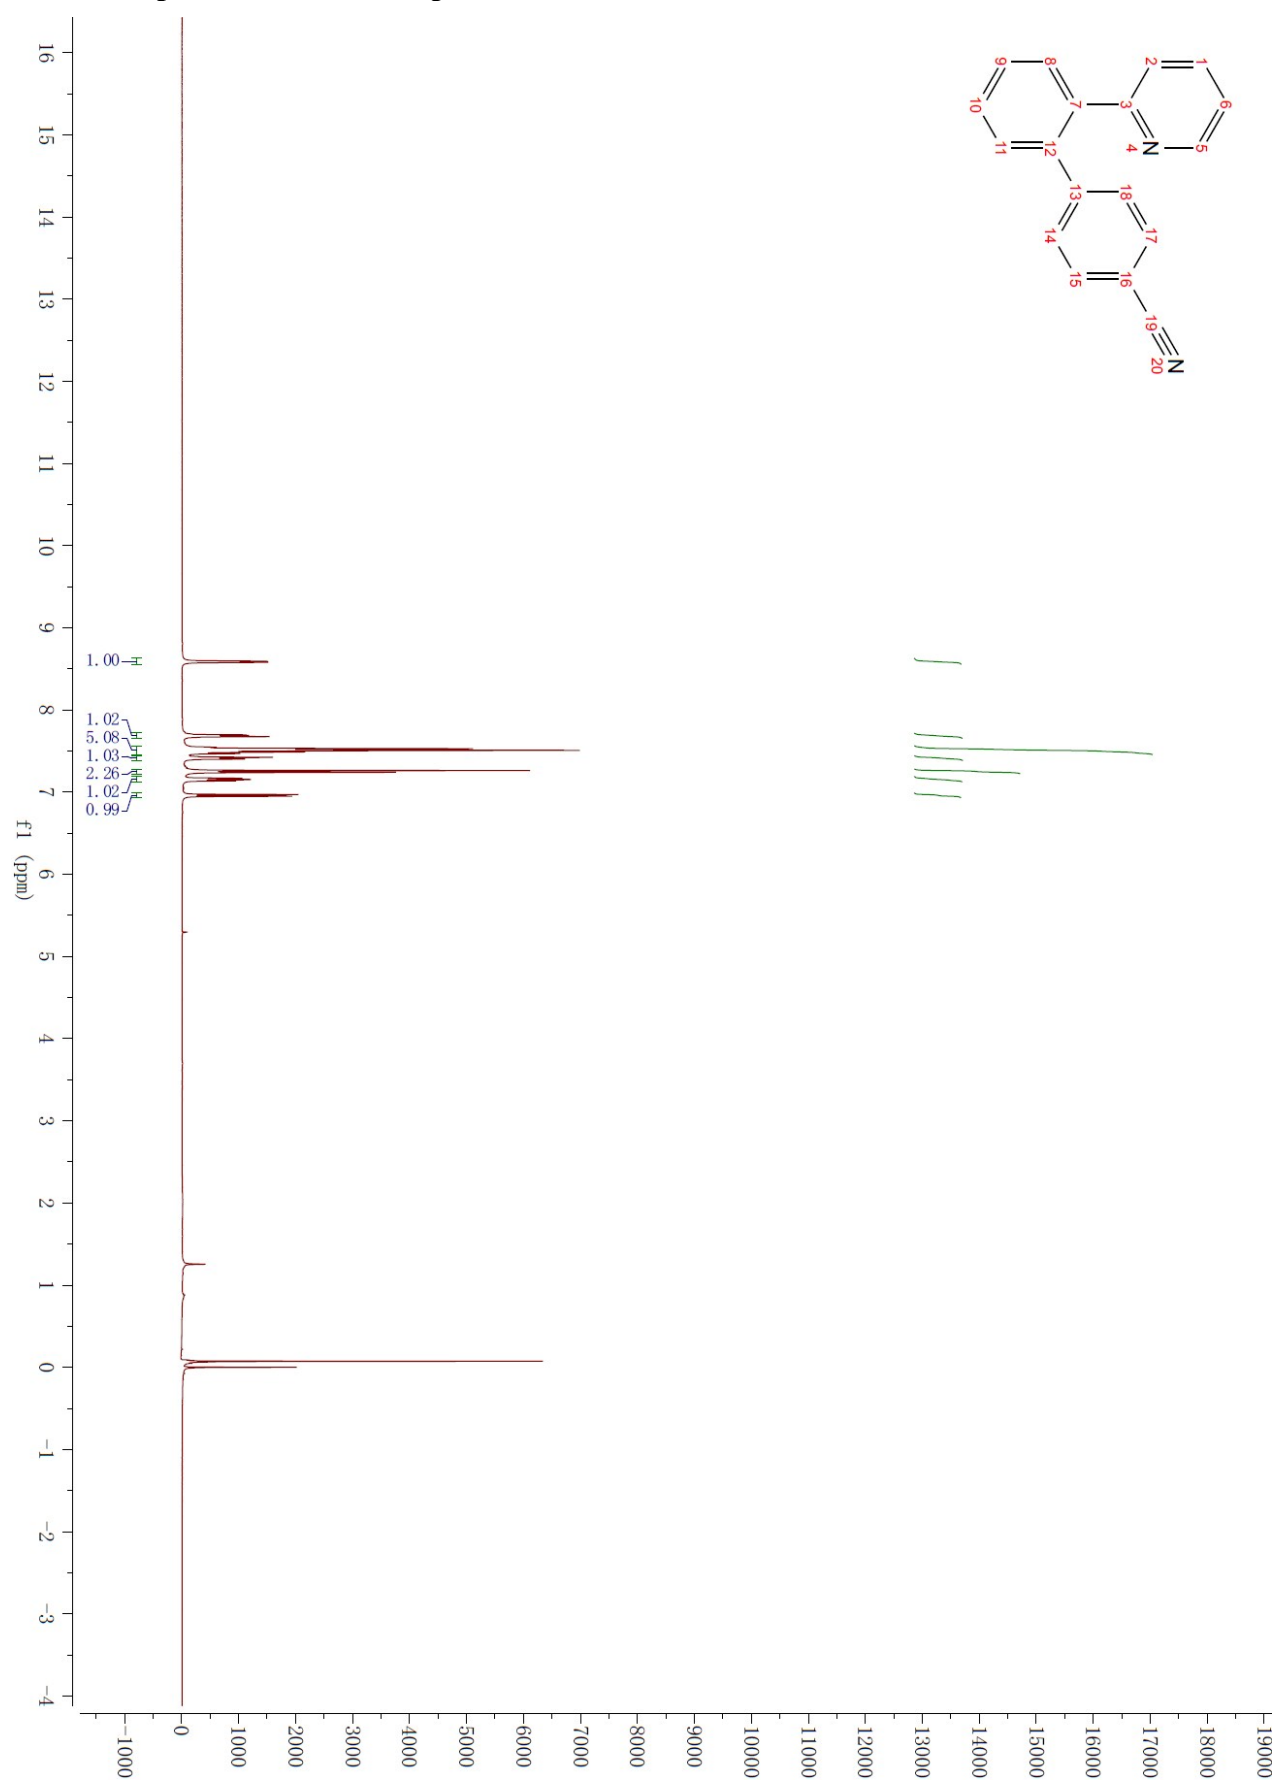

# <sup>13</sup>C NMR Spectrum of the Compound 3au

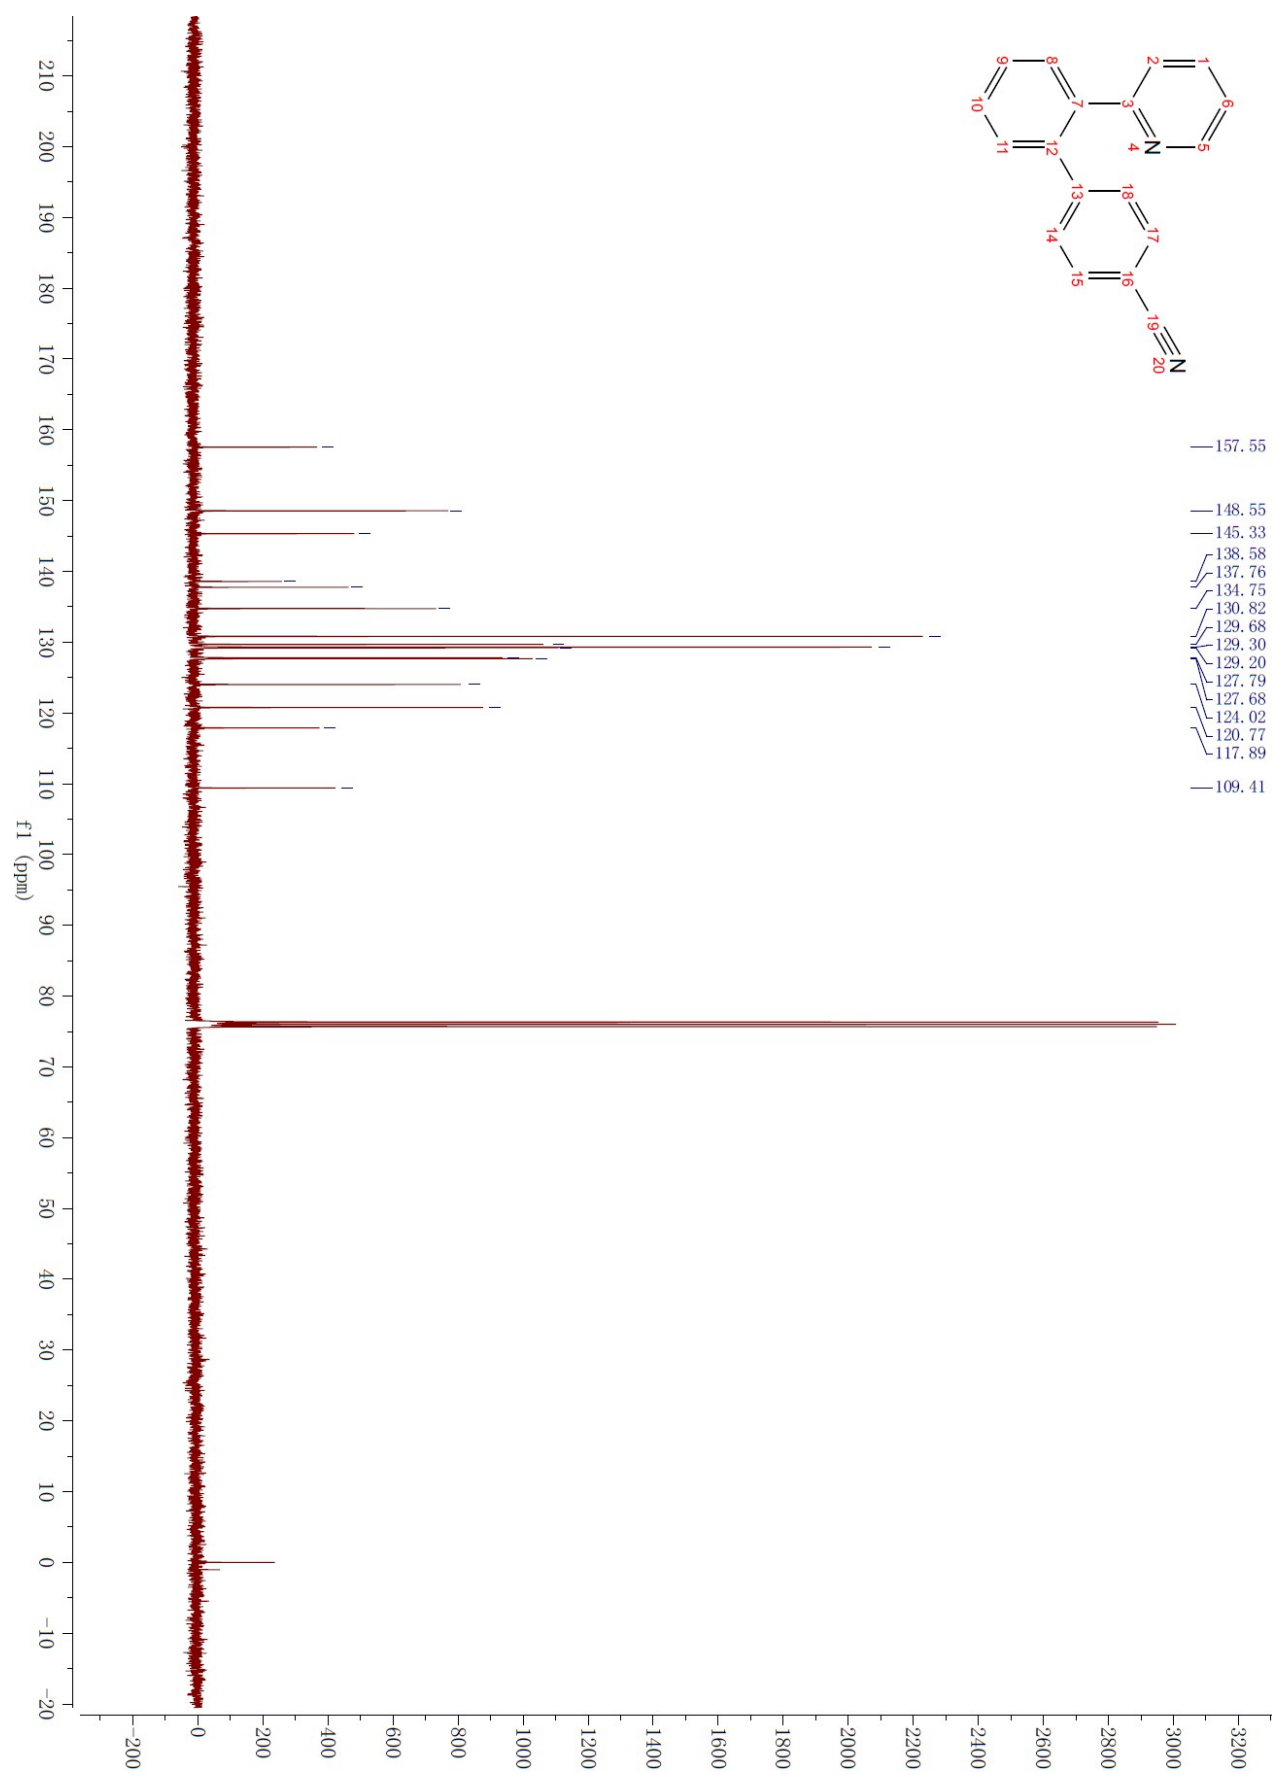

# <sup>1</sup>H NMR Spectrum of the Compound 4au

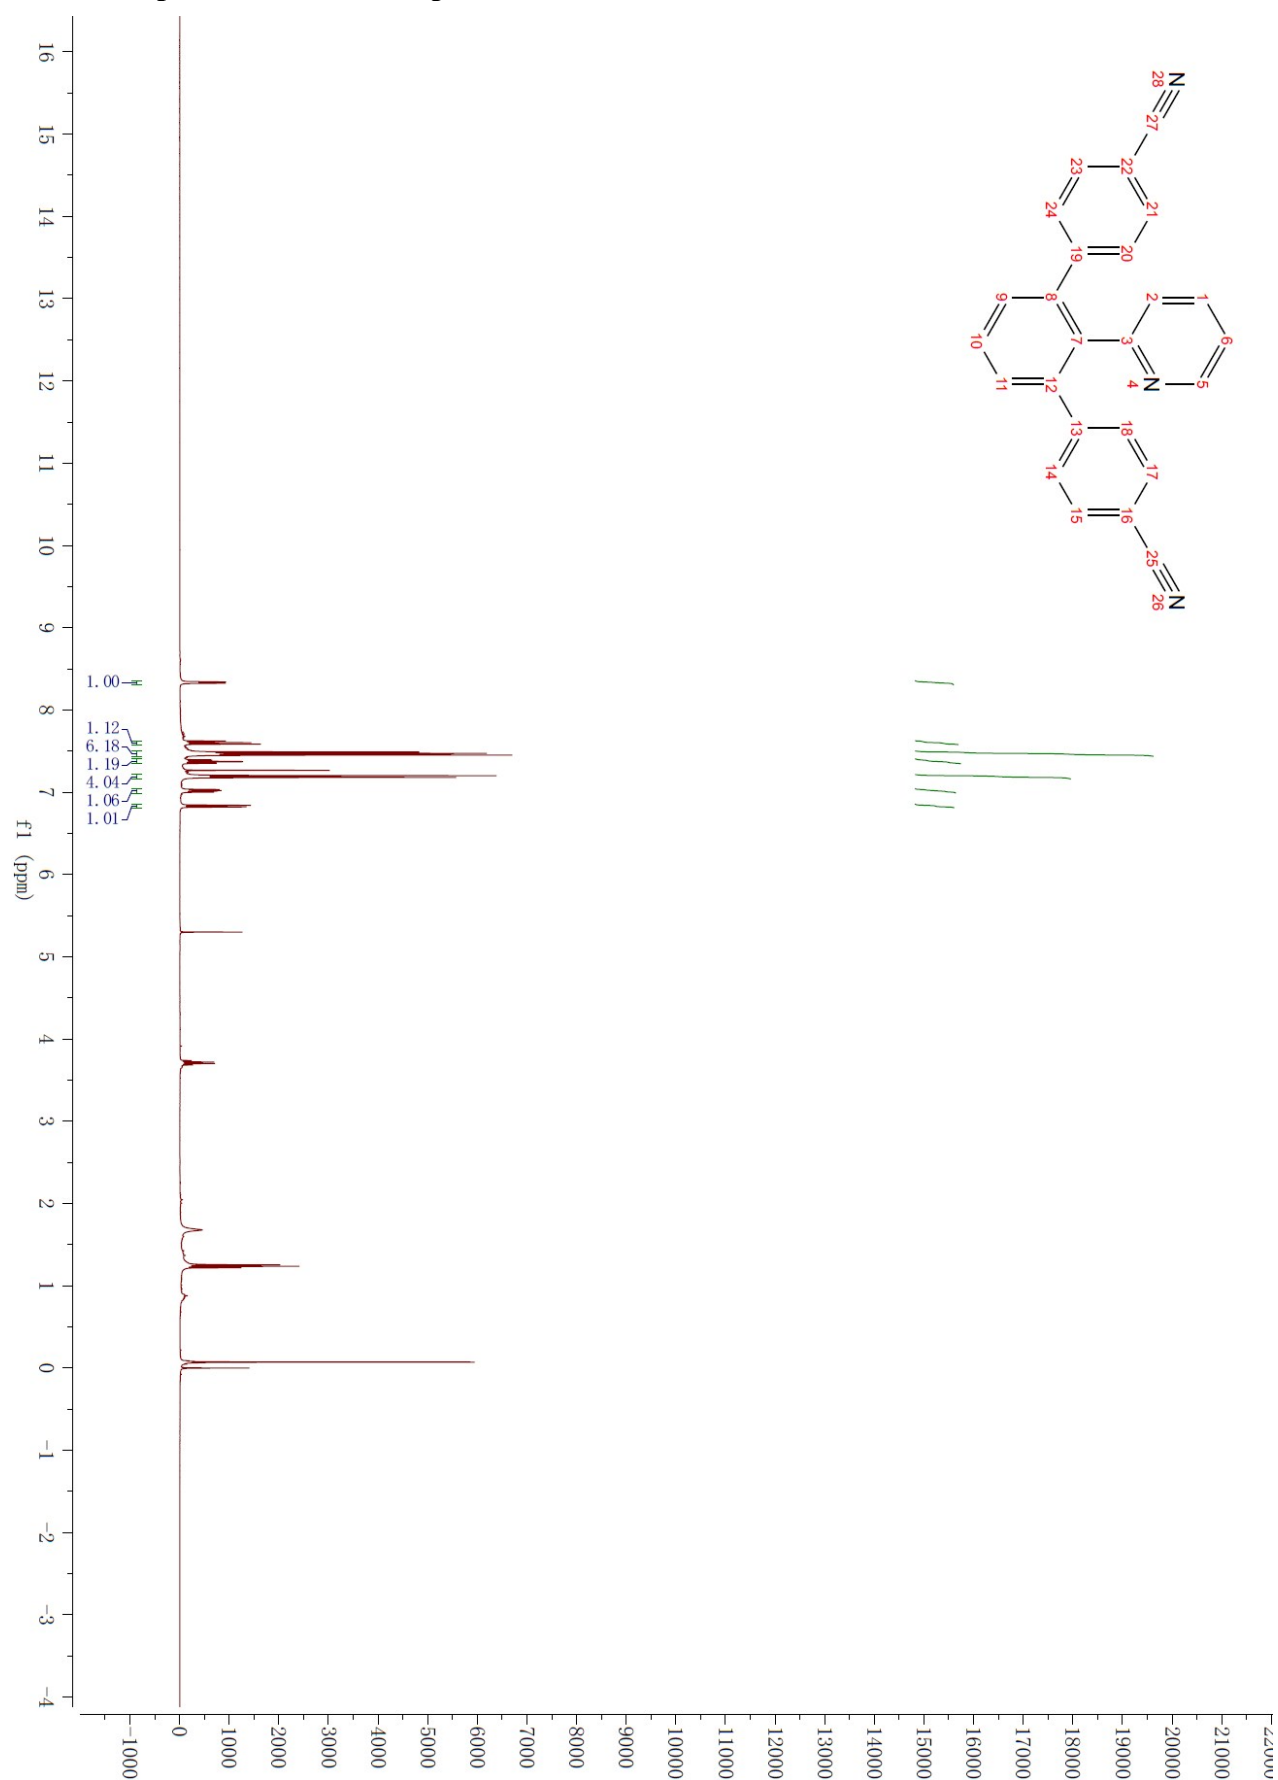

# <sup>13</sup>C NMR Spectrum of the Compound 4au

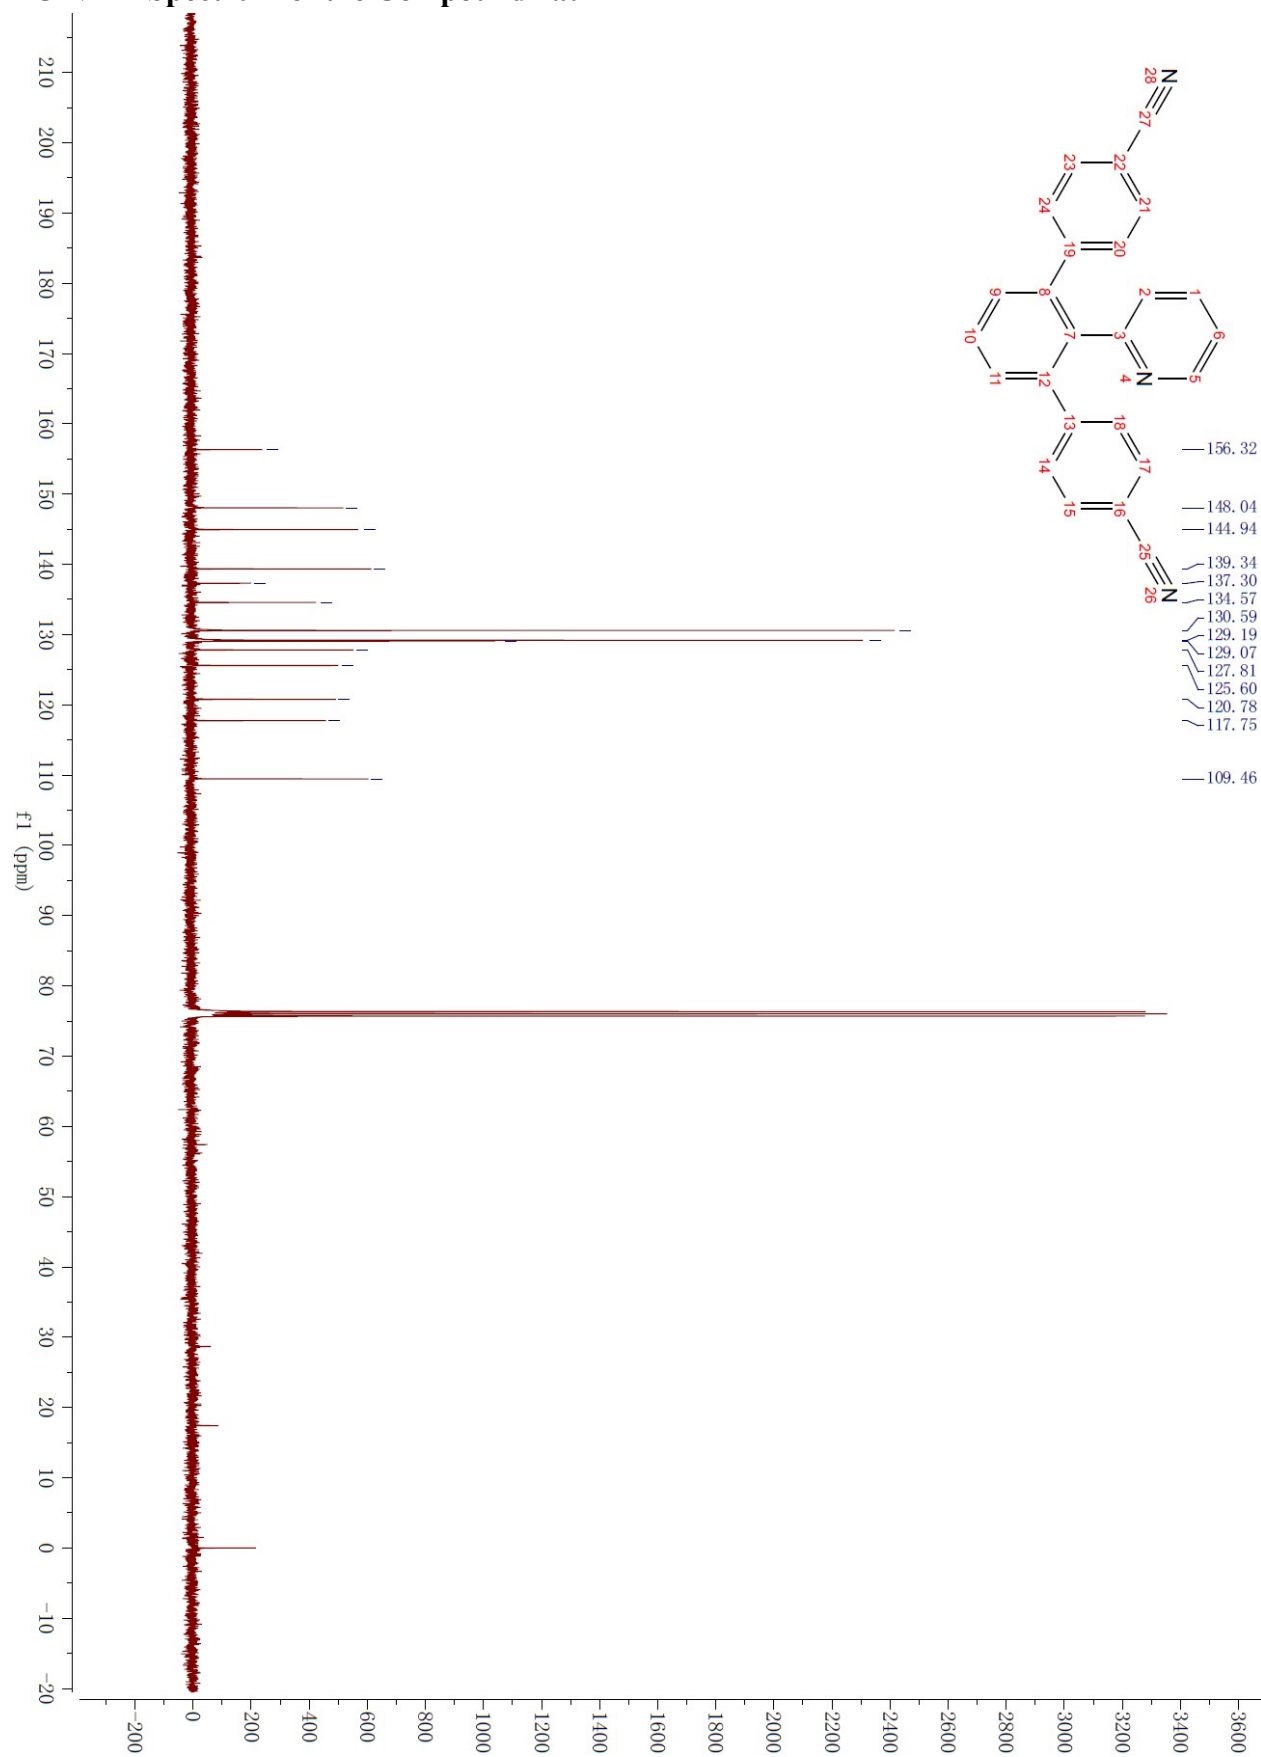

# <sup>1</sup>H NMR Spectrum of the Compound 3gm

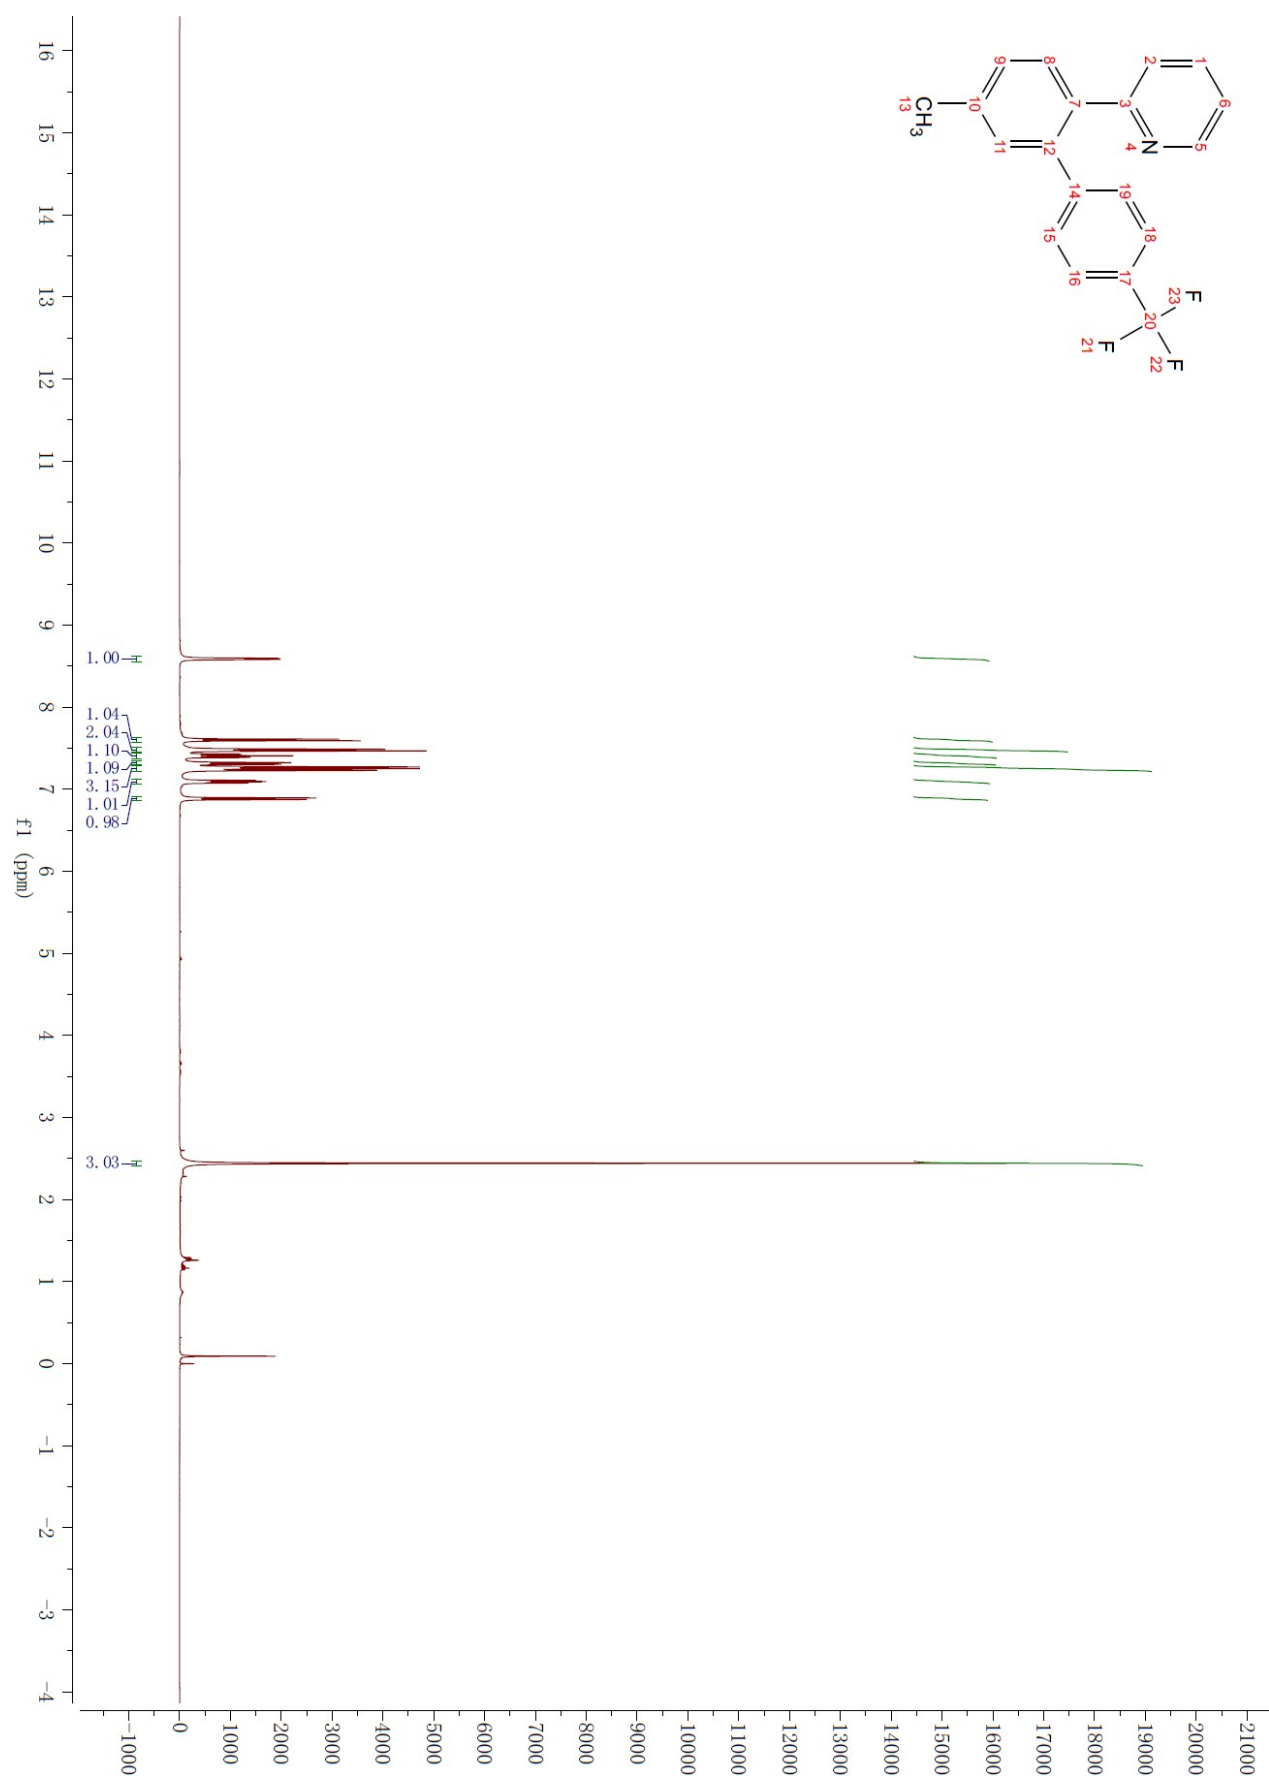



# <sup>13</sup>C NMR Spectrum of the Compound 3gm

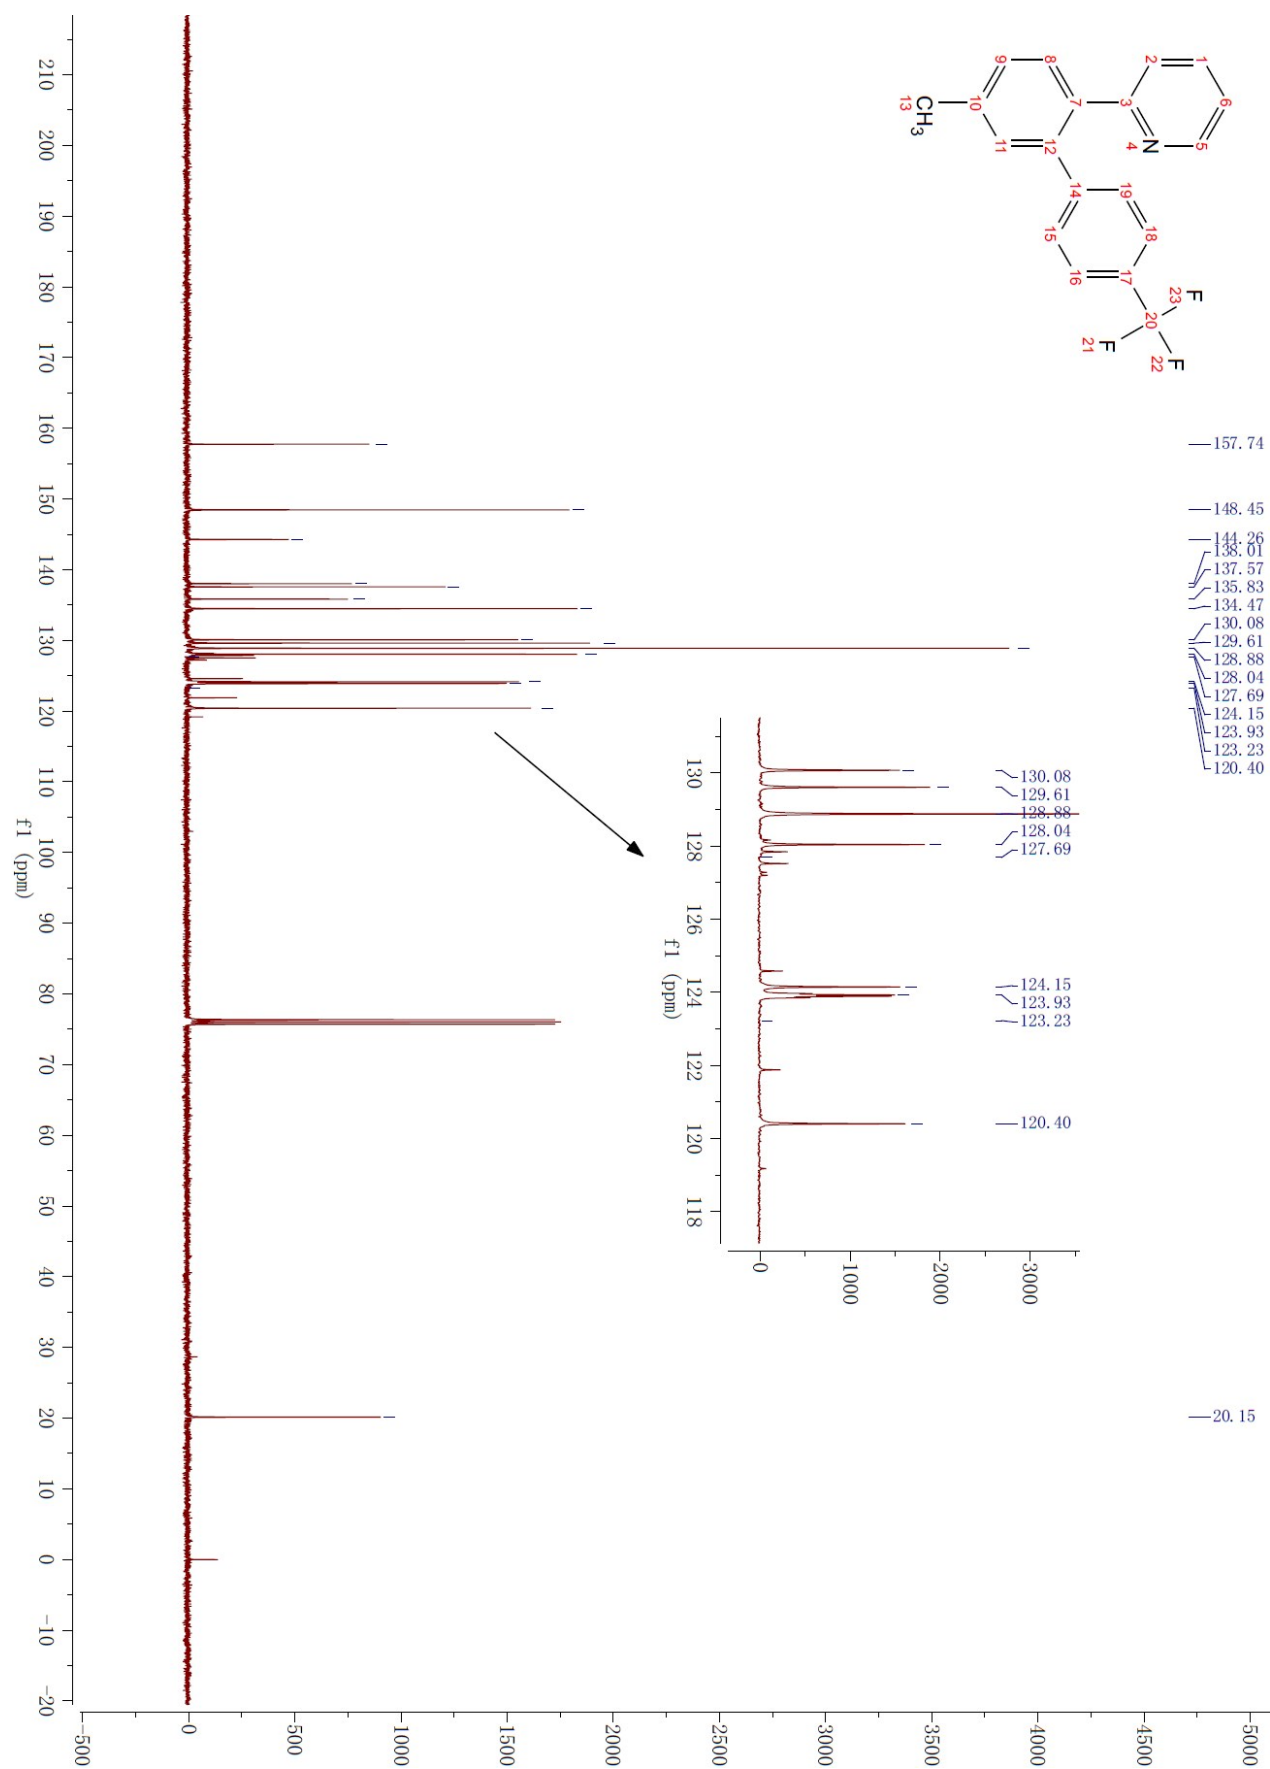

# <sup>1</sup>H NMR Spectrum of the Compound 4gm

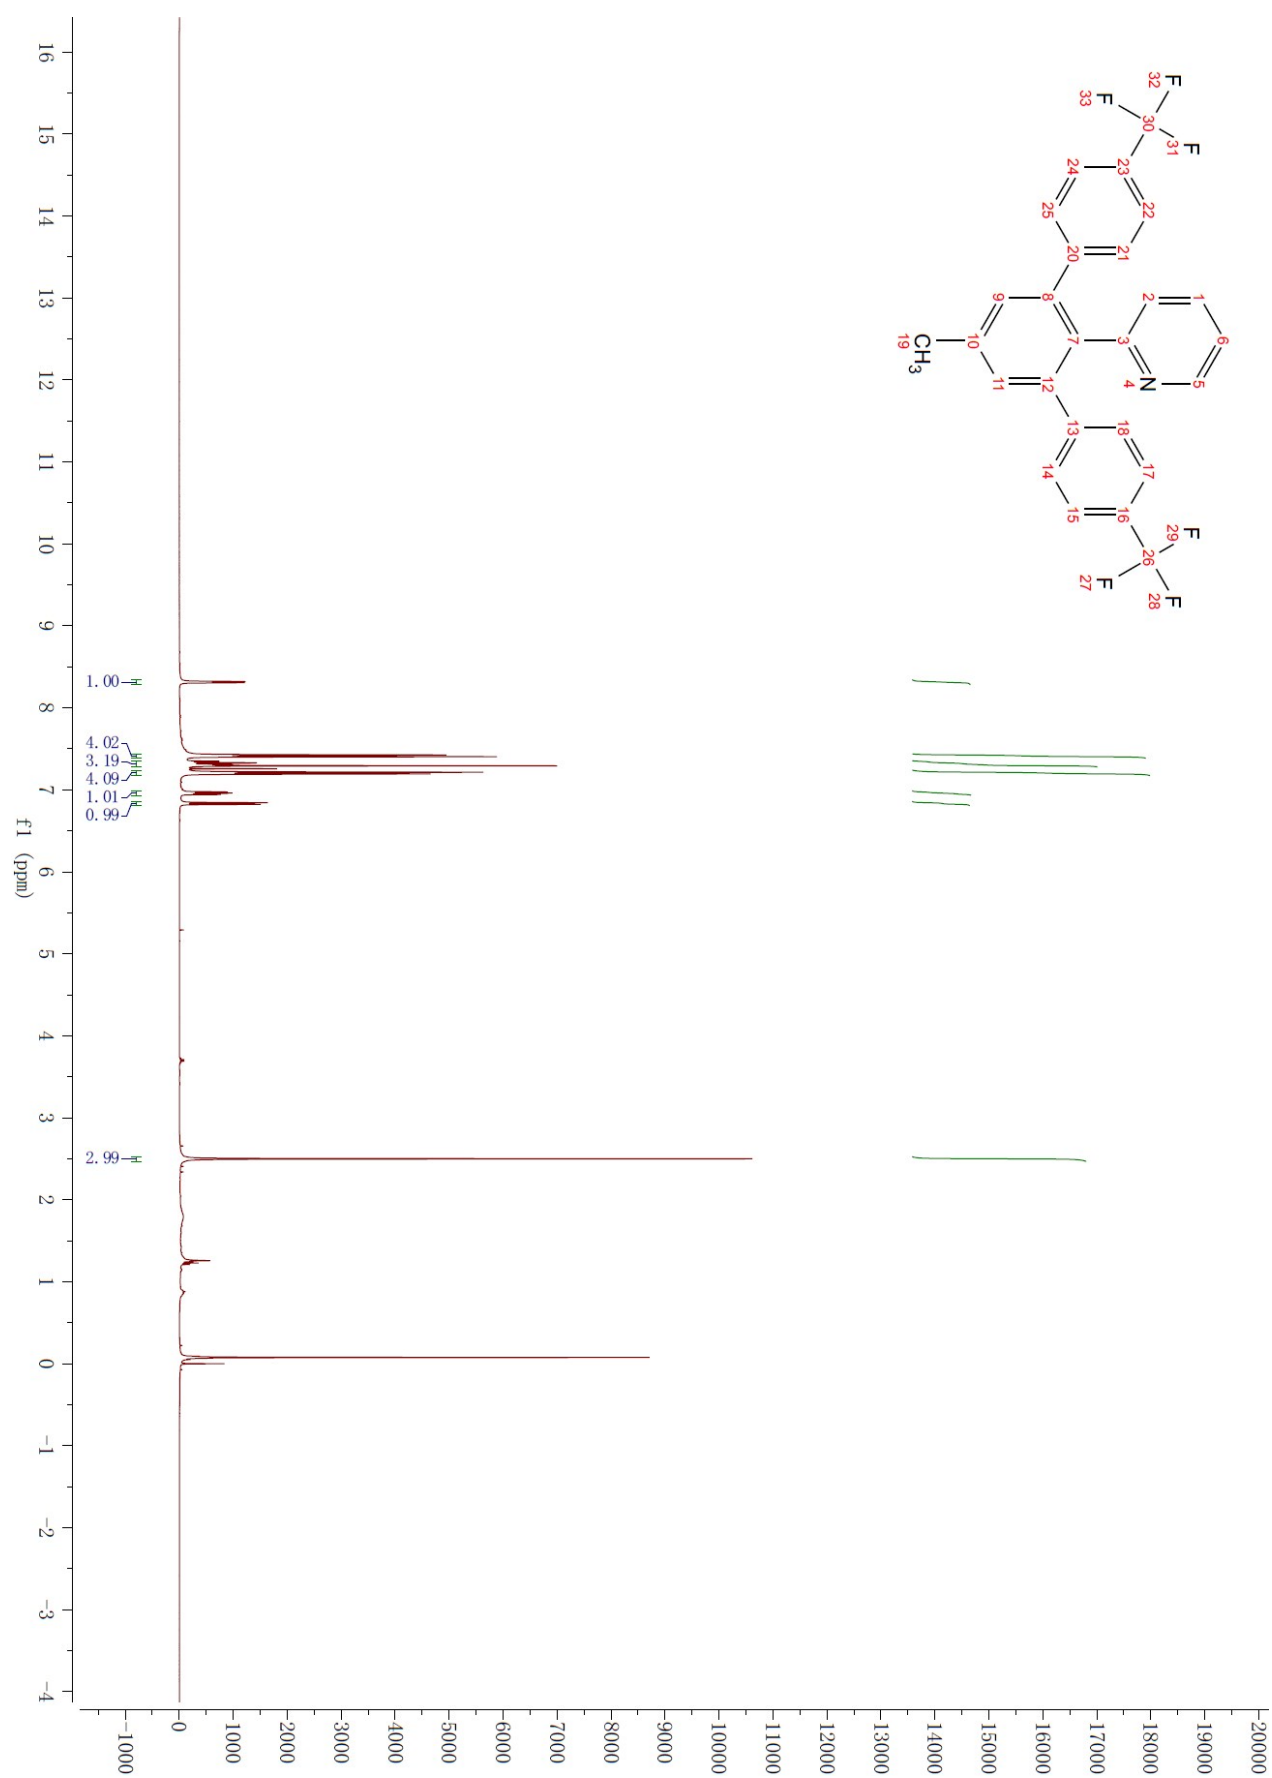

# <sup>13</sup>C NMR Spectrum of the Compound 4gm

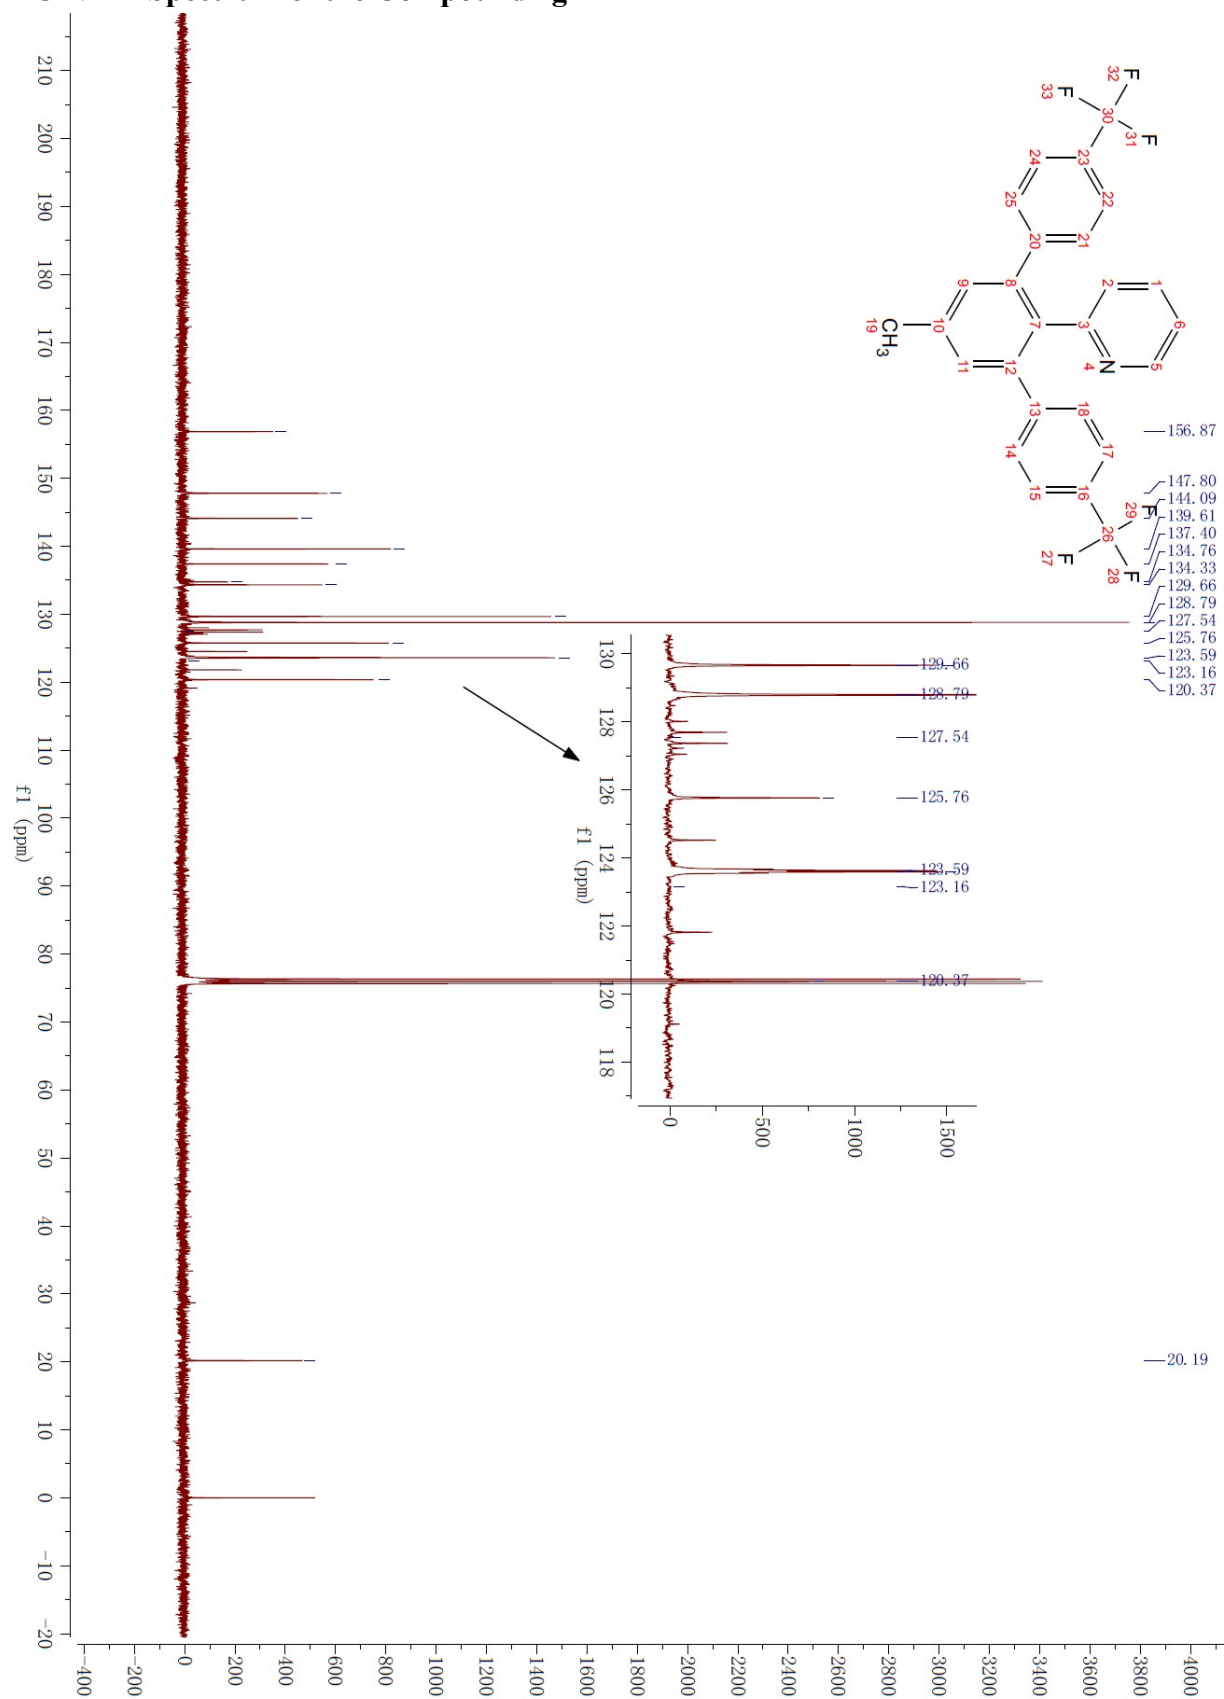

# <sup>1</sup>H NMR Spectrum of the Compound hm

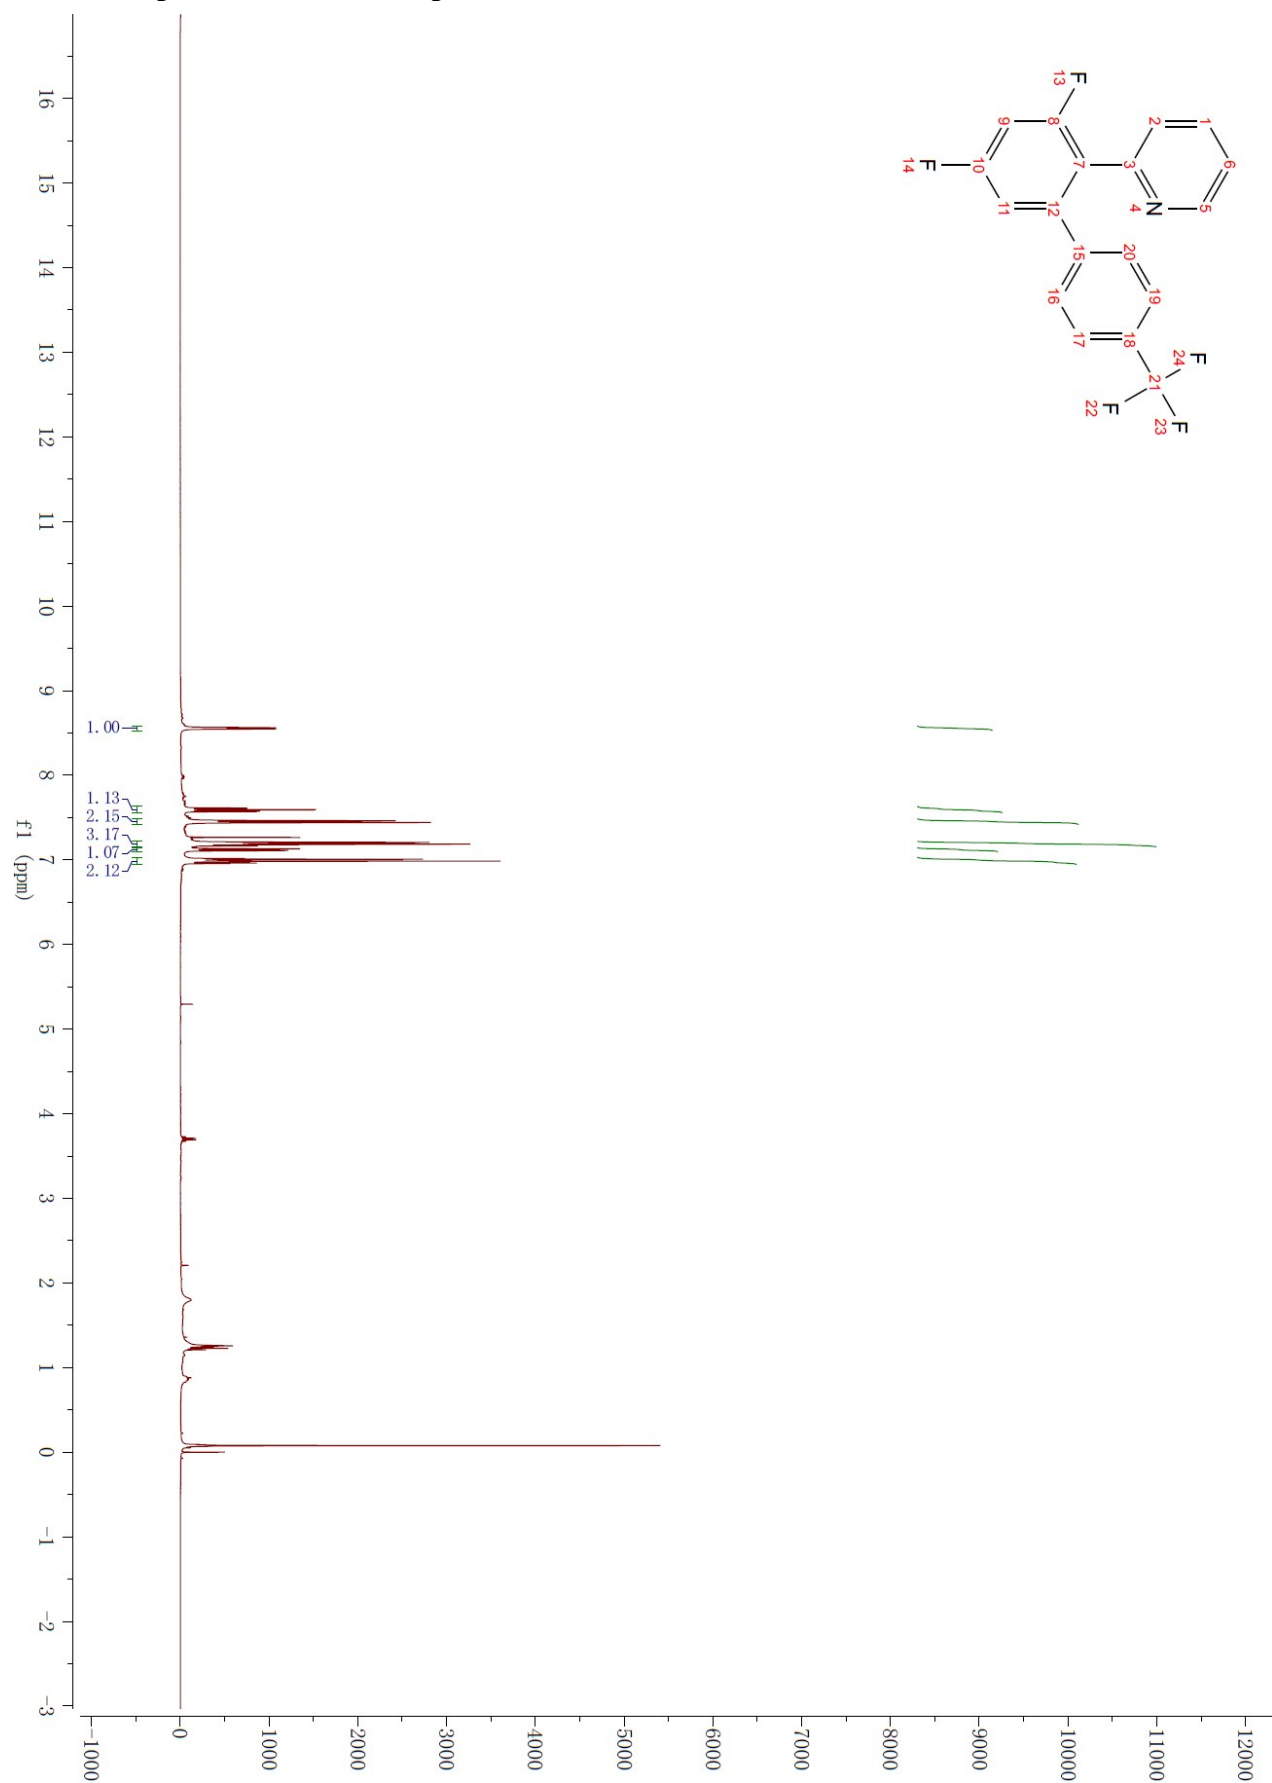

# <sup>13</sup>C NMR Spectrum of the Compound hm

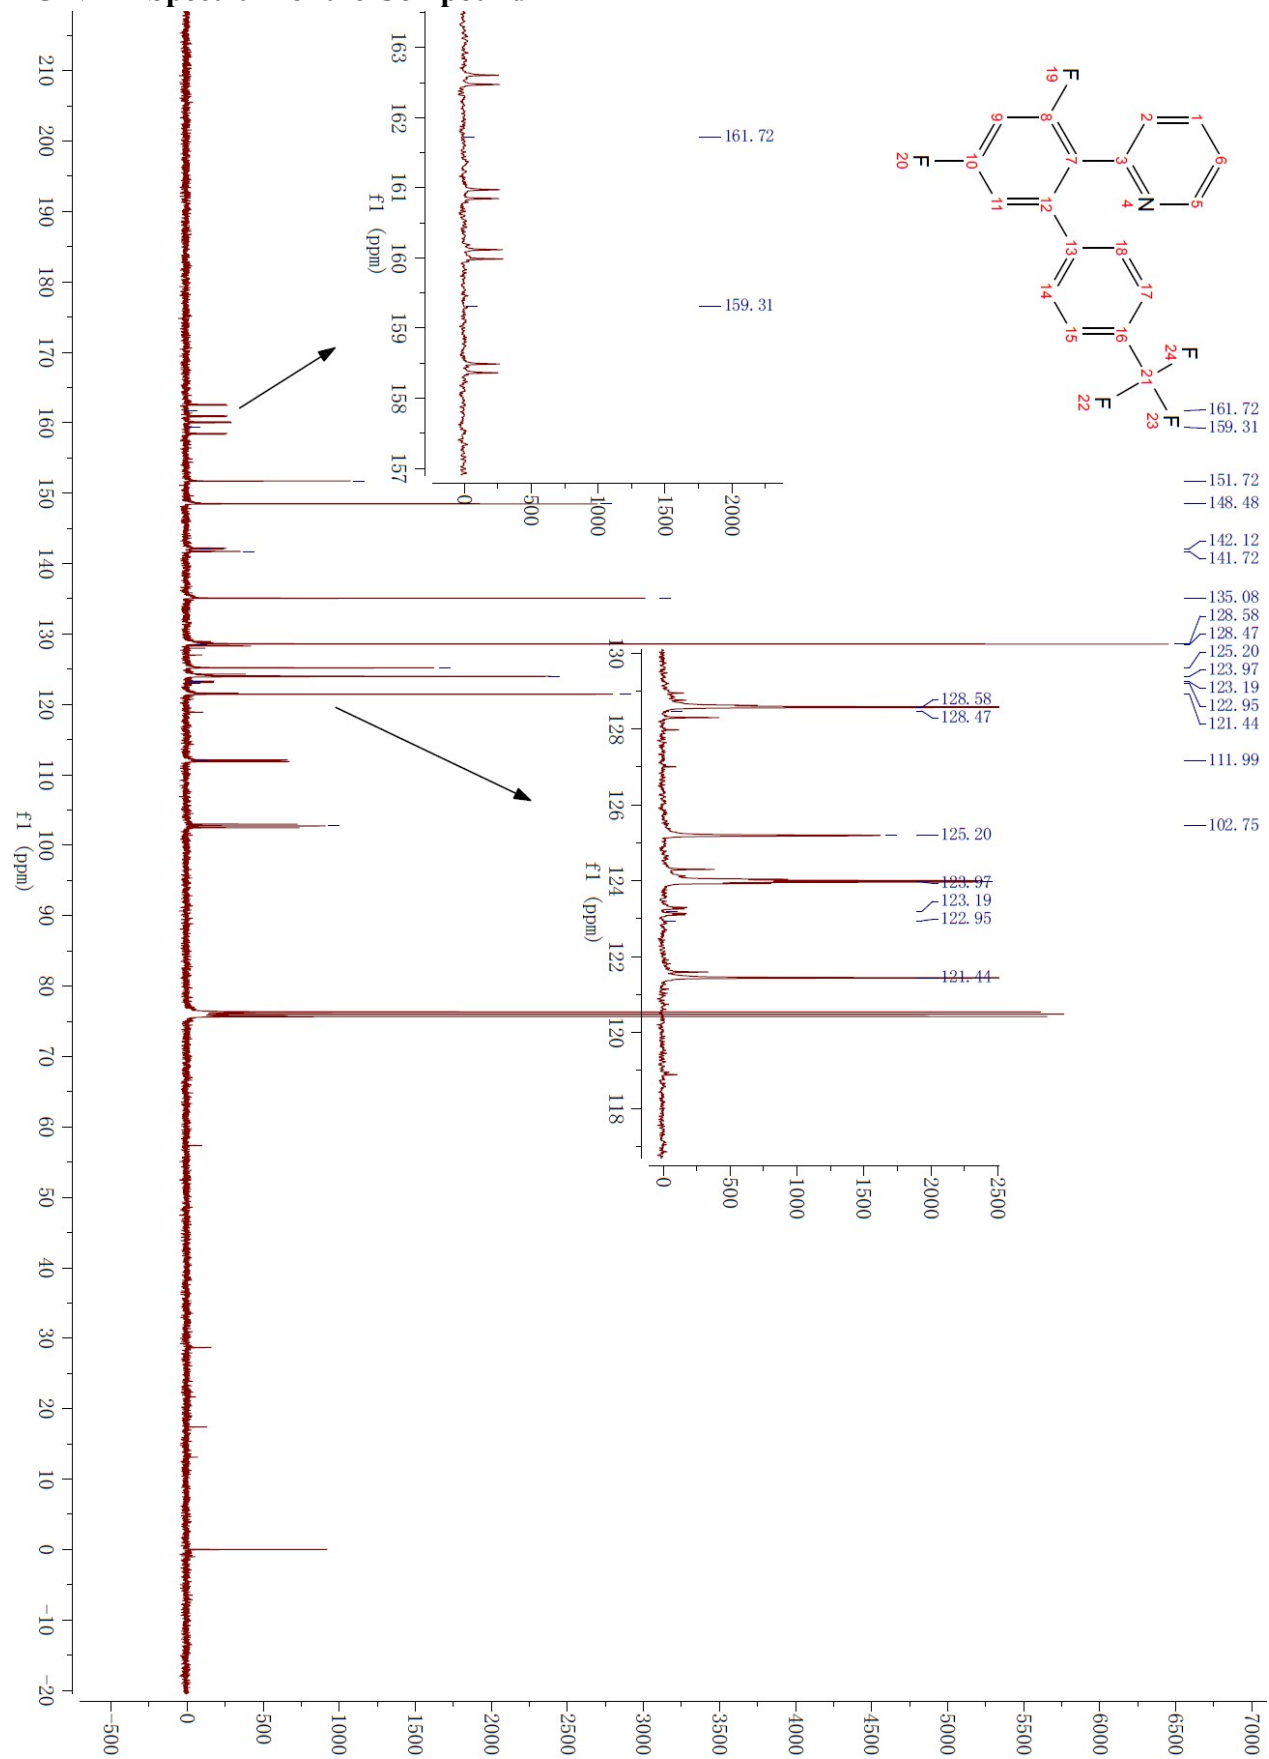

Supplement: c7ra02638b1.pdf [file c7ra02638b1.pdf]
